# Supplementary material for: A scoping review of tropical pioneer trees’ roles for restoration and conservation management: Harungana madagascariensis (Hypericaceae) a widespread African species as a model
Source: PeerJ. 2025 May 23;13:e19458. doi: 10.7717/peerj.19458 (PMC12105622; doi:10.7717/peerj.19458)
Supplement: Supplemental Information 2 — Each data line represents a record included in the final analysis and all data extracted are included in columns. [file peerj-13-19458-s002.xlsx]

## Sheet: Sheet1
title of publication	author	year	interaction_type	potential_for_restoration	topic_raw	interaction	pioneer/succession	growth	accessed	Country	habitat	Nb of wet season	Nb of dry season	strata	min pluviometry	max pluviometry	annual evaporation (mm)	pluviometry	temperature	humidity	altitude	catchment	HAMA presence	frugivore	part eaten	Eligibility	BA (cm3/ha)	Mean DBH	Density	Soil type	flowering	fruiting	Document type
24 INVASIVE WEEDS IN THE WET TROPICS	Goosem, Stephen	2009			invasive	habitat - invasive			yes	Australia																yes_final							Book chapter
27. The Ecology of Maesopsis Invasion and Dynamics of the Evergreen Forest of the East Usambaras, and their Implications for Forest Conservation and Forestry Practices	Binggeli, Pierre	1989			seed bank, habitat	habitat			yes	Tanzania	Maesopsis plantation			undercanopy												yes_final							Book chapter
29. Seed Banks in the Forest Soils	Binggeli, P and Ruffo, CK and Taylor, D	1989			forest succession	habitat	yes		yes	Tanzania	submontane forest										960					yes_final							Book chapter
A 23,000 yr pollen record from Lake Rukwa (8 S, SW Tanzania): new data on vegetation dynamics and climate in Central Eastern Africa	Vincens, Annie and Buchet, Guillaume and Williamson, David and Taieb, Maurice	2005			pollen, habitat	habitat			yes	Tanzania		1 (Nov-Apr)				1500	2000	995								yes_final							Journal article
A behaviorally plastic response to forest composition and logging disturbance by Varecia variegata variegata in Ranomafana National Park, Madagascar	Balko, Elizabeth Anne	1998	Predation or mutualism (Frugivory); Predation (Folivory)		herbivory, DBH, crown, phenology	herbivory		yes	yes	Madagascar	unlogged forest, moderately disturbed forest and heavily disturbed forest													Varecia variegata variegata	fruits and young leaves	yes_final							PhD thesis
A checklist of the flora of Budongo Forest Reserve, Uganda, with notes on ecology and phenology	Synnott, T	1985			habitat	habitat			yes	Uganda	forest edge, wooded grassland and secondary forest	2 (apr-may; sept-oct)	1 (dec-feb)				1600				1050					yes_final					sept-dec	dec	Book
A checklist of the flora of edaphic grasslands in the rainforest belts of Edo and Delta states of Nigeria	Obadoni, BO and Edema, NE and Erheni, H and Ogie-Odia, E and Amukali, O	2009			habitat	habitat			yes	Nigeria	grassland															yes_final							Journal article
A first plant checklist for Mt. Namuli, northern Mozambique	Timberlake, JONATHAN	2021			habitat	habitat			yes	Mozambique	forest margin										1250-1940					yes_final							Journal article
A fruit diet rather than invertebrate diet maintains a robust innate immunity in an omnivorous tropical songbird	Nwaogu, Chima J and Galema, Annabet and Cresswell, Will and Dietz, Maurine W and Tieleman, B Irene	2020	Predation or mutualism (Frugivory)		herbivory	herbivory			yes	Nigeria														Pycnonotus barbatus	fruits	yes_final							Journal article
A new species of Philoscirtus (Orthoptera: Phaneropteridae: Mecopodinae) from the West Usambara Mountains of Tanzania and its conservation status	Hemp, Claudia and Heller, Klaus-Gerhard and Warcha<c5><82>owska-<c5><9a>liwa, El<c5><bc>bieta and Hemp, Andreas	2015			habitat	habitat			yes	Tanzania	intermediate forest										1200-1300					yes_final							Journal article
A preliminary account of the plant ecology of the Chimanimani Mountains	Phipps, JB and Goodier, R	1962			habitat, pioneer	habitat	yes		yes	Zimbabwe	dry montane evergreen forest, Bracken scrub' (Crook 1956)			shrub layer	741	2997					1500-1800					yes_final							Journal article
A preliminary list of chimpanzees' alimentation at Bossou, Guinea	Sugiyama, Yukimaru and Koman, Jeremy	1987	Predation or mutualism (Frugivory); Predation (Florivory)		herbivory	herbivory			yes	Guinea	secondary forest													chimpanzee	bud and fruit	yes_final							Journal article
A reconstruction of Atlantic Central African biomes and forest succession stages derived from modern pollen data and plant functional types	Lebamba, J and Ngomanda, A and Vincens, A and Jolly, D and Favier, C and Elenga, H and Bentaleb, I	2009			pollen, forest succession	habitat	yes		yes	Central Africa	lowland forest regrowth										400					yes_final							Journal article
A review of wetlands and coastal resources of the Niger Delta: Potentials, Challenges and Prospects	Nwankwoala, HO and Okujagu, DC	2014			habitat	habitat			yes	Nigeria	freshwater forest	1 (july-sept)	1 (dec-feb)		3000	4500			27							yes_final							Journal article
A revision of Afrotropical Thrinchostoma de Saussure, 1890 (Hymenoptera: Apoidea: Halictidae)	Pauly, Alain and Eardley, CD	2013	Undefined		insect host	insect host			yes	Gabon																yes_final							Journal article
A structural and floristic analysis of woody fallow vegetation near Ibadan, Nigeria	Hall, John B and Okali, DUU	1979			forest succession, pioneer	habitat	yes		yes	Nigeria	woody fallow		1 (nov-march)					1280			190-230					yes_final				predominantly Ferric Luvisol			Journal article
A study of the dynamic ecology of Zambian vegetation	Lawton, RM	1978			habitat, strata	habitat			yes	Zambia	evergreen forest	1 (nov-apr)	1 (may-oct)	undercanopy	1000	1270					1000-1680					yes_final				sols ferralitique			Journal article
A synecological study of Usambara, Tanganyika Territory, with particular reference to birds	Moreau, RE	1935			habitat	habitat			yes	Tanzania	Intermediate Dry Evergreen Forest, fallows															yes_final							Journal article
Abondance et distribution des abeilles du genre Xylocopa Latreille, 1802 (Hymenoptera: Apoidea) du Burundi	Ndayikeza, Longin and Nzigidahera, Beno<c3><ae>t and Mpawenimana, Alexis and Habonimana, B	2014	Undefined		insect host	insect host			yes	Burundi																yes_final							Journal article
ACTIVITES ET MODELE DE DISPERSION DE Daubentonia madagascariensis (Gmelin, 1788) MALE DANS LA FORET CLASSEE DE KIANJAVATO, SUD-EST DE MADAGASCAR	Dom<c3><a9>nico, RANDIMBIHARINIRINA Roger and Freddy, Monsieur RANAIVOARISOA Jean	2015			habitat	habitat			yes	Madagascar	degraded forest (savoka)	1 (nov-apr)	1 (may-oct)					1916.4	23.3	85						yes_final							Master thesis
Additions to the genus Xenidiocercus (coelomycetes) from Ghana	Wu, Wenping and Sutton, Brian C.	1995	Predation (parasitism)		host for fungus	fungus host			yes	Ghana																yes_final							Journal article
Agonistic and affiliative relationships in a blue monkey group	CORDS, MARINA	2000	Predation or mutualism (Frugivory)		herbivory	herbivory			yes															C. mitis stuhlmanni	fruits	yes_final							Book
Ambendrana: un territoire d'entre-deux	Blanc-Pamard, CHANTAL and Ralaivita, MBININTSOA	2004			pioneer	habitat	yes		yes	Madagascar	forêt dense ombrophile de moyenne altitude				1300	1400			16		1100-1400					yes_final				sols ferralitique			Project report
Analyse de la dynamique spatio-temporelle du paysage forestier à l'échelle écorégionale de Madagascar	WAEBER, Monsieur PATRICK	2015			habitat	habitat			yes	Madagascar	degraded humid forest				1046	3677			20.9-23.7							yes_final				sols ferralitique et hydromorphe			Master thesis
Analyse de la flore des jachères du Burundi	Bangirinama, Fr<c3><a9>d<c3><a9>ric and Bigendako, Marie-Jos<c3><a9> and Havyarimana, Fran<c3><a7>ois and Bogaert, Jan	2011			habitat	habitat			yes	Burundi	jacheres															yes_final							Journal article
Analyse de la fragmentation forestiere et du gradient specifique des fragments: cas du massif forestier dÁmbohitantely	Salomon, AMONJISOA Bruno and Mihajamanana, ENILALANA Fetra and Samuel, AZANAKA and Chrysostome, ANDRIAMBOAVONJY Jean and Marie, A Larissa	2015		Heliophilous pioneer trait and rapid growth	restoration	restoration			yes	Madagascar																yes_final							Master thesis
Analyse des Métaux par la Technique ICP-OES dans les Plantes. Hyperaccumulation de Nickel dans les Zones d’Exploitation Minière d’Ambatovy et Potentiel de Phytoremediation	Hamy, RAMAMONJY Anjaramalala and les membres de Jury, Devant	2016		Phytoremediation potential	restoration	restoration			yes	Madagascar																yes_final							Master thesis
Analyse floristique et phytogéographique de la forêt de la Djoumouna (République du Congo)	Miabangana, Edmond Sylvestre and Lubini Ayingweu, Constantin and Malaisse, Fran<c3><a7>ois	2016			distribution	distribution			yes	Congo	riverine forest	1 (oct-May)	1 (june-sept)													yes_final				sols ferralitiques			Journal article
Analyse palynologique de divers sondages du secteur haute altitude du Parc National de Kahuzi-Biega: Paleoenvironnements et paleoclimats au Pleistocène supérieur et à l'Holocène.	Kabonyi Nzabandora, Chantal	2012			habitat, forest succession	habitat	yes		yes	Congo	Forêt mésophile de montagne, swamp										2000-2260					yes_final							PhD thesis
Analyse systématique et phytogéographique de la forêt classée de la Bamo (Côte d’Ivoire)	ADINGRA, Odette MMA and KASSI, Justin N<e2><80><99>Dja and YONGO, Olga Diane	2014			pioneer	forest succession	yes		yes	Cote d'Ivoire	jacheres de foret							1585	26.7							yes_final				sols ferralitiques et hydromorphes			Journal article
Ants response to mining prospection disturbances across vegetation zones in tropical mountain chains of Mount Nimba, Guinea, West Africa	Yeo, Kolo and Kouakou, Lombart Mesmer Maurice and Touao, Martine Kah and Gauze, Epouse and Ouattara, Kaly and Soro, Ang<c3><a8>le Nicodenin	2019			habitat	habitat			yes	Guinea	transition savannahs							2800								yes_final		18-33		sols ferralitiques			Journal article
Aperçu de la phytodynamique holocène du milieu montagnard sur la chaîne volcanique des Virunga (Nord du Rwanda)	ROCHE, Emile and NZABANDORA, Chantal KABONYI and NTAGANDA, Charles	2015			habitat	habitat			yes	Rwanda	savannah										1500-1700					yes_final							Synthesis report
Apis mellifera unicolor (Latreille, 1804, Hymenoptera: Apidae) et Varrroa destructor (Anderson and Trueman, 2000, Acari : Varroidae) à Madagascar : diversité génétique, impact et comportement hygiénique	Rasolofoarivao, Henriette	2014	Mutualism (potential) - Flower visitation (potential pollination)		flowering, melliferous	flower visitation			yes	Madagascar																yes_final							PhD thesis
Ecotourism development in Ikogosi Warmspring, Ekiti State, Nigeria: Implication on woody species composition and structure	Olaniyi, OE and Ogunjemite, BG	2015			habitat	habitat			yes	Nigeria	undevelopped area	1 (apr-oct)	1 (nov-mar)						21-28							yes_final							Journal article
Are Primates Ecosystem Engineers?	Chapman, Colin A. and Bonnell, Tyler R. and Gogarten, Jan F. and Lambert, Joanna E. and Omeja, Patrick A. and Twinomugisha, Dennis and Wasserman, Michael D. and Rothman, Jessica M.	2013	Predation (Florivory)		herbivory	herbivory			yes	Uganda															leaves	yes_final							Journal article
Assaying techniques to improve dry season plantings in eastern Madagascar	Logan, Chris M and Hill, D Matthew and Solofoniaina Fidy, Jean F and Robertho, Jean C and Reid, J Leighton	2022		High survival rate of seedling	restoration	restoration			yes	Madagascar																yes_final							Journal article
Assessing Floristic Diversity and Ecological Characteristics of Mount Mbapit Savannah, Western Highlands of Cameroon	Baudoin, Wouokoue Taffo Junior and Flore, Nnanga Jeanne and Clovis, Kengne Olivier and Elodie, Mafouo Tchinda and Severin, Kenfack Feukeng Samuel and Jonathan, Ngnignindiwou Mouncharou and Eric, Ndonmou Cantona and Bleriot, Fomekong Tane Alex and Louise, Avana Tientcheu Marie and Theophile, Fonkou	2023			habitat	habitat			yes	Cameroun	savannah	1 (mar-nov)	1 (dec-feb)	shrub				2500	21							yes_final				vitric andosols			Journal article
Assessment of Key Biodiversity Areas in the Lofa-Gola-Mano & Nimba complexes (West Africa) using Ecosystem Criteria	Senterre, Bruno and Bidault, Ehoarn and St<c3><a9>vart, Tariq and Lowry II, Porter P	2020			habitat	habitat			yes	West Africa	West African Mesic forest of the Montane tropical perhumid moist evergreen rainforest zone (mountain forest), dwarf forest on rocky slope on shallow soil															yes_final							Report
Assessment of soil seed bank from six different vegetation types in Kakamega forest, Western Kenya	Mukhongo, Jennifer N and Kinyamario, JI and Chira, RM and Musila, W	2011			seed bank, habitat	habitat			yes	Kenya	plantation forest of Cypress trees, Cupressus lusitanica							1960			1500-1700					yes_final							Journal article
Assessment of street tree diversity, structure and protection in planned and unplanned neighborhoods of Lubumbashi City (DR Congo)	Useni Sikuzani, Yannick and Mpibwe Kalenga, Alex and Yona Mleci, Jonas and N<e2><80><99>Tambwe Nghonda, Dieudonn<c3><a9> and Malaisse, Fran<c3><a7>ois and Bogaert, Jan	2022			habitat, frequency	habitat		yes	yes	RDC	street borders	1 (nov-mar)	1 (may-sept)						20.1		1200-1300					yes_final				feralsols (yellow and red)			Journal article
Assessment of Tree Diversity of Riparian Forest Fragments in Omo Biosphere Reserve, Ogun State, Nigeria	Olatidoye, Olatidoye OR and Isichei, Isichei AO and OYELOWO, OYELOWO OJ and Koyejo, Koyejo OA and Kambi, Kambi C and Jeminiwa, Jeminiwa OR	2023			habitat, dbh, density	habitat		yes	yes	Nigeria	riparian forest															yes_final	1.056	16.9					Journal article
Atlas pollinique des régions montagneuses bordières du Lac Kivu	NZABANDORA, Chantal KABONYI	2016			habitat, distribution	habitat			yes	Congo	formations secondaires dans les forêts de montagne ; recrûs forestiers				1600	2400										yes_final							Journal article
Bee diversity along a forest regeneration gradient in Western Kenya	Gikungu, Mary and Wittmann, Dieter and Irungu, David and Kraemer, Manfred	2011	Mutualism (potential); Flower visitation (potential pollination); Competition	Competition with other heliphilous species	restoration, pioneer, pollinator, nectarivor	flower visitation and restoration	yes		yes	Kenya	secondary forest															yes_final							Journal article
Bee diversity and some aspects of their ecological interactions with plants in a successional tropical community	Gikungu, Mary Wanjiku	2006	Mutualism (potential); Flower visitation (potential pollination)		bees, insect, succession	flower visitation and insect	yes		yes	Kenya	secondary forests													13 species of bees	pollen	yes_final							PhD thesis
Belowground carbon storage in coffee agroforestry systems: A strategy to mitigate climate change	Cossa, Maria T and Massad, Tara J and Fangueiro, David and Ribeiro, Natasha S and Coutinho, Jo<c3><a3>o and Fraga, Irene and Ribeiro-Barros, Ana I	2023			habitat	habitat			yes	Mozambique	forest fragment							2006.6								yes_final				sols ferralitic			Journal article
Bettle fauna of agro and forest ecosystems in a tropical rainforest habitat, Nigeria	Ewuim, Chima Sylvanus	2008			habitat	habitat			yes	Nigeria	secondary regrowth forest															yes_final							Journal article
BIOCULTURAL LANDSCAPE DIVERSITY SHAPED BY AGRICULTURAL SYSTEMS	DISTRICT, VAVATENINA	2022			habitat	habitat			yes	Madagascar	post-agricultural regrowths (savoka)	1 (oct-mar)	1(june-sept)					3000			20-340					yes_final				yellow-red hydromorph ferralitic soil			Journal article
Biodiversity and ecosystem dynamics of the Cameroon mountains during the last 20 000 years: pollen analysis from Lake Bambili	Assi-Kaudjhis, Chimene	2011			pollen, habitat	habitat			yes	Cameroun	fro-montagnard ; forêt de montagne ; forêt sub-montagnarde; forêt dense humide										400-2273					yes_final							PhD thesis
Biodiversity, carbon stock and market value assessment for the SGSOC project area, Southwest region, Cameroon	Kupsch, Denis and Serge, Bobo Kadiri and Waltert, Matthias and Chia, Ntumwel Bonito and Brice, Beukou Choumbou Ghislain and Abdoulaye, Djoda and Kalagan, Djafsia	2014			habitat, basal area	habitat		yes	yes	Cameroun	NA															yes_final							Report
Birding in Ghana, West Africa	Moyer, David	1996	Predation or mutualism (Frugivory)		herbivory	herbivory			yes	Ghana														Slender-billed Andropadus gracilirostris , YellowwhiskeredA. latirostri, s CamerounSombreA. curvirostris, LittleA. virens, Ansorgeâ€™sA. ansorgei, White-tailed Thescelocichla leucopleura, Golden Calyptocichla senna, and Honeyguide	fruits	yes_final							Journal article
Botanical Diversity of the Pleistocene Forest Refuge	Doudou, Monts	2004			habitat	habitat			yes	Gabon	NA															yes_final							Master thesis
Boundary Edge Effects in Bwindi Impenetrable National Park	Olupot, William	2004			habitat, edge effect	habitat			yes	Uganda	disturbed forest										1160-1650					yes_final							Report
Bridging restoration and multi-functionality in degraded forest landscapes of Eastern Africa and Indian Ocean islands. Third Reporting Period of FOREAIM. Scientific Report. Partner 3-CEH. Report on activities. Third reporting period: 1st June 2007-31st May 2008	Cavers, Stephen and Wilson, Julia and Dick, Janet and Ingleby, Kevin and Munro, Robert	2008			pioneer, forest succession	habitat	yes		yes	Madagascar	savannah, savoka (abandonned agricultural land)															yes_final							Project report
Broadening the resource base: Shortened fallows in southern Cameroon	Ngobo, Martine	2009			habitat	habitat			yes	Cameroun	forest fallow				1510	1820			22.9-25							yes_final				yellow-red ferralitic soil			Journal article
Can management improve the value of shade plantations for the endemic species of São Tomé Island?	De Lima, Ricardo F and Viegas, Leonel and Sol<c3><a9>, Nelson and Soares, Estev<c3><a3>o and Dallimer, Martin and Atkinson, Philip W and Barlow, Jos	2014			habitat	habitat			yes	Sao Tome	shade plantation and forest															yes_final							Journal article
Caractérisation de la mosaïque forestière et identification des espèces indicatrices en forêt tropicale humide d’Ipassa, Gabon	Engone, JP Obame and Legendre, P and B<c3><a9>langer, L and Borcard, D and Assame, BS	2018			pioneer, forest succession	habitat	yes		yes	Gabon	chablis et les jachères forestières	2	2					1700	23.9	85						yes_final				Ferrasols xanthiques (sols ferralitiques)			Journal article
Caractérisation des communautés végétales d'une réserve de Miombo en relation avec la faune (Lubumbashi, RDC)	Muyle, Margaux	2012			habitat, abundance	habitat		yes	yes	RDC	forest and secondary forest							1200	2028-11-01		1140-1220					yes_final							Master thesis
CARACTERISATION ECOLOGIQUE ET EVALUATION DE LA PRODUCTION DE Ravenala madagascariensis Sonn. DANS LE SAVOKA DE RANOMAFANA-EST ET DE SES ENVIRONS (DISTRICT DE BRICKAVILLE)	ENVIRONS, RESTETDE	2018			habitat	habitat			yes	Madagascar	savoka							2828	23.5		53-487					yes_final							Master thesis
Cartographie de l'occupation du sol et des pâturages naturels des trois provinces septentrionales du Cameroun: notice explicative	Forgiarini, Giordano and Klein, Henri Dominique	2004			habitat	habitat			yes	Cameroun	degraded savannah, herbaceous savannah, facies arbore, foret claire															yes_final							Project report
Central African biomes and forest succession stages derived from modern pollen data and plant functional types	Lebamba, J and Ngomanda, A and Vincens, A and Jolly, D and Favier, C and Elenga, H and Bentaleb, Ilham	2009			forest succession	habitat	yes		yes	Central Africa	savannah, tropical forest regrowth, young secondary forest										400					yes_final							Journal article
Changes in carbon stocks and tree diversity in agro-ecosystems in south western Uganda: what role for carbon sequestration payments?	Nakakaawa, C and Aune, J and Vedeld, P	2010		Carbon sequestration	carbon sequestration	restoration			yes	Uganda																yes_final							Journal article
Chapter 4 - Agroforestry and the Mitigation of Land Degradation in the Humid and Sub-Humid Tropics of Africa: This chapter was previously published in Cooper, P.J.M., Leakey, R.R.B., Rao, M.R., Reynolds, L., 1996. Experimental Agriculture, 32, 235Ã¢â‚¬â€œ290, with permission of Cambridge University Press	Leakey, Roger R.B.	2017		Improve/indicate soil fertility	soil fertility	restoration			yes	Africa																yes_final							Journal article
Characterization of Martap Woody Vegetation, Adamaoua-Cameroon	Sago, Ibrahima Wani<c3><a9> and Clovis, Kengne Olivier and Djallo, Djoulaiyatou and Dieudonn<c3><a9>, Ranava and Adamou, Ibrahima	2023			habitat	habitat			yes	Cameroun	wooded savannahs, protected savannahs,							1479	21							yes_final				ferralitic soil brown or red			Journal article
Chemical control of harungana (Harungana madagascariensis) shrubs in Queensland	Vitelli, Joseph and van Haaren, Peter	2001			control, invasive	habitat - invasive			yes	Australia																yes_final							Journal article
Chimpanzee Behavior in the Wild	Nishida, Toshisada and Zamma, Koichiro and Matsusaka, Takahisa and Inaba, Agumi and McGrew, William C.	2010	Predation or mutualism (Frugivory)		herbivory	herbivory			yes															chimpanzee	fruits	yes_final							Book
Chipya in Kasanka National Park, Zambia: floristics, soils and dynamics	Smith, Paul P and Fisher, Robert	2001			habitat	habitat			yes	Zambia	closed dry evergreen forest	1(nov-apr)			1000	1600										yes_final				utisols andoxisolsfrom non-basic rock			Journal article
Combining local ecological knowledge and field investigations to assess diet composition and feeding habit of forest elephants in Campo-Maan National Park, Southern Cameroon	Djoko, Isaac Blaise and Weladji, Robert Bertrand and Par<c3><a9>, Patrick	2022	Predation (Florivory and Stem damage)		herbivory, predation	herbivory, predation			yes	Cameroun														elephant	stem and leaves	yes_final							Journal article
COMPARATIVE STUDY OF SOIL SEED STOCK AT Hevea brasiliensis PLANTATION AND SWAMPY SOIL OF RIVER ANYA AT UMUDIKE, NIGERIA	Dike, MC and Ezeigbo, EU	2011			seed bank, habitat	habitat			yes	Nigeria	Hevea brasiliensis plantation	1 (mar-nov)	1 (nov-mar)		1500	3000			19-35							yes_final							Journal article
Comparisons between original and current composition of indigenous tree species around Mount Kenya	Kindt, Roeland and Lilleso, JP and Van Breugel, Paulo	2007			habitat	habitat			yes	Kenya	moist intermediate forest, moist montane forest															yes_final							Journal article
Complementarity of native and introduced tree species	Lavialle, J and Carri<c3><a8>re, SM and Miandrimanana, C and Tilahimena, A and Birkinshaw, CR and Aronson, J	2015		Improve/indicate soil fertility	pioneer, soil fertility	restoration	yes		yes	Madagascar	Savoka															yes_final							Journal article
Composition, spatial heterogeneity and seasonal turnover of plant-pollinator communities in an agriculture-forest-mosaic	Hagen, Melanie	2008	Mutualism (potential) - Flower visitation (potential pollination)		pollinator, bees	flower visitation			yes	Kenya																yes_final							Master thesis
agroforestry and biodiversity conservation in tropical landscapes	Schroth, G<c3><b6>tz and Da Fonseca, Gustavo AB and Harvey, Celia A and Gascon, Claude and Vasconcelos, Heraldo L and Izac, Anne-Marie N and Angelsen, Arild and Finegan, Bryan and Kaimowitz, David and Krauss, Ulrike	2004			pioneer	habitat	yes		yes	Tropical Africa	fallows															yes_final							Book
Contrasting growth and mortality responses of different species lead to shifts in tropical montane tree community composition in a warmer climate	Ntirugulirwa, Bonaventure and Zibera, Etienne and Epaphrodite, Nkuba and Manishimwe, Aloysie and Nsabimana, Donat and Uddling, Johan and Wallin, G<c3><b6>ran	2023			pioneer	habitat	yes		yes	Rwanda	transitional forest										1600-2000					yes_final							Journal article
Contribution à l’étude biogéographique des petits mammifères non-volants des Hautes Terres Malgaches	Loetitia, SOARIMALALA RÃƒÂ©gis AngÃƒÂ©line	2007			habitat, forest succession	habitat	yes		yes	Madagascar	Savoka															yes_final				Mention only			PhD thesis
Contribution à l’étude de la mycoflore ectomycorhizienne associée aux plantations d’essences exotiques du Burundi	Nkengurutse, Jacques and MEERTS, Pierre Jacques	2012			indicator of disturbance, habitat	habitat	yes		yes	Burundi	disturbed forest															yes_final							Master thesis
Contribution to the study of the microfungi in the saprotrophic specialization in tropical forest litter	Mulas, B and Rambelli, A	1995	Commensalism		host for fungus	host for fungus			yes	Cote d'Ivoire																yes_final							Journal article
Control of invasive alien weeds averts imminent plant extinction	Baider, Cl<c3><a1>udia and Florens, F. B. Vincent	2011			pioneer	habitat	yes		yes	Mauritius	NA															yes_final							Journal article
Control of Lantana camara L. in Bwindi Impenetrable National Park, south‐western Uganda	Safari, Chrispine and Byarugaba, Dominic	2008			pioneer	habitat	yes		yes	Uganda																yes_final							Journal article
De l’espèce au territoire. La gestion locale de la biodiversité en Guinée Maritime	Leciak, Elisabeth	2006	Predation or mutualism (Frugivory)		pioneer, herbivory	herbivory	yes		yes	Guinea maritime														chimpanzee	fruits	yes_final							PhD thesis
Decision support tools for management of miombo woodlands	Mugasha, Wilson Ancelm	2017			habitat	habitat			yes	Central Africa	NA															yes_final							PhD thesis
Deep phylogenetic divergence between Scolytoplatypus and Remansus, a new genus of Scolytoplatypodini from Madagascar (Coleoptera, Curculionidae, Scolytinae)	Jordal, Bjarte H	2013	Undefined		insect host	insect host			yes	Madagascar																yes_final							Journal article
Définition d'un état zero et mise en place d'un système de suivi écologique permanent de l'arboretum de la station forestière de Mandraka	Robisoa, Mirana Arilala and Rajoelison, Lalanirina Gabrielle and Rabenilalana, Fetra Mihajamanana and Rakoto Ratsimba, Harifidy	2008			habitat	habitat			yes	Madagascar	secondary forest							2300.28	17.5							yes_final				ferralitic soil			Master thesis
Deforestation et systemes agraires a Madagascar: les dynamiques des tavy sur la cote orientale	Aubert, Sigrid and Razafiarison, Serge and Bertrand, Alain	2003			habitat, forest succession	habitat	yes		yes	Madagascar																yes_final							Book
Degrading uplands in the rainforest region of Madagascar: Fallow biomass, nutrient stocks, and soil nutrient availability	Styger, Erika and Fernandes, Erick C. M. and Rakotondramasy, Harivelo M. and Rajaobelinirina, Eric	2009			habitat, forest succession	habitat	yes		yes	Madagascar	fallow				2000	3500			17-21.5		350-1200					yes_final				Inceptisols and Ultisols with acid surface soils			Journal article
Deriving species richness, endemism, and threatened species patterns from incomplete distribution data in the Bioko Island, Equatorial Guinea	Zafra-Calvo, Noelia and Lobo, Jorge Miguel and de Albuquerque, Fabio Suzart and Cabezas, Francisco and Espigares, T<c3><ad>scar and Olalla-T<c3><a1>rraga, Miguel <c3><81>ngel and del Val, Jaime P<c3><a9>rez and Rueda, Marta and Velayos, Mauricio and Rodr<c3><ad>guez, Miguel <c3><81>ngel	2010			habitat	habitat			yes	Bioko island, Equatorial guinea		1 (apr-oct)	1 (nov-mar)		1557	10934		1557-10934	12-26.5							yes_final							Journal article
Description and Tree Species Composition for Woodland and Wooded Grassland Potential Natural Vegetation Types	Kindt, R and van Breugel, P and Lilles<c3><b8>, JPB and Bingham, M and Demissew, Sebsebe and Dudley, C and Friis, I and Gachathi, F and Kalema, J and Mbago, F	2011			habitat	habitat			yes	Kenya, Uganda	wooded grassland															yes_final							Report
Detection and analysis of land cover dynamics in moist tropical rainforest of South Cameroon	Shu, G Neba	2003			habitat	habitat			yes	Cameroun	NA	2 (sept-nov; apr-may)	2 (dec-mar; june-aug)		1719	22836			25		0-500					yes_final				deep moderately drained yellowish brown tropical clay soils (Ultisols), deep well drained, reddish brown tropical clay soils (Oxisols), and grayish alluvial soils restricted to alluvial plains and valley bottoms (Inceptisols)			Master thesis
Determinants of vegetation composition and diversity of a moist forest-savanna boundary in south-eastern Zimbabwe	Mapaure, Isaac	2012			habitat	habitat			yes	Zimbabwe	Savannah															yes_final							Journal article
Development of a soil and terrain map/database	Beernaert, FR	1999			habitat	habitat			yes	RDC	secondary forest															yes_final							Report
Diet composition of the invasive red-whiskered bulbul Pycnonotus jocosus in Mauritius	Linnebjerg, Jannie Fries and Hansen, Dennis M and Bunbury, Nancy and Olesen, Jens M	2010	Predation or mutualism (Frugivory)		herbivory	herbivory			yes	Mauritius														Pycnonotus jocosus	fruits	yes_final							Journal article
Diet of Grauer's gorillas (Gorilla beringei graueri) in a low-elevation forest	van der Hoek, Yntze and Pazo, Wadika Dumbo and Binyinyi, Escobar and Ngobobo, Urbain and Stoinski, Tara S and Caillaud, Damien	2021	Predation (herbivory)		herbivory	herbivory			yes	RDC								2100-2500	20-27		500-1000			Grauer's gorilla	unknown	yes_final							Journal article
Diet of the brown mouse lemur (Microcebus rufus) in Ranomafana National Park, Madagascar	Atsalis, Sylvia	1999	Predation or mutualism (Frugivory)		herbivory, fruit content	herbivory			yes	Madagascar														Microcebus rufus, lemurs, birds	fruits	yes_final							Journal article
Diet of the Silvery-cheeked Hornbill Bycanistes brevis during the breeding season in the East Usambara Mountains, Tanzania	Cordeiro, Norbert J and Campbell, Joshua T and Ndangalasi, Henry J	2016	Predation or mutualism (Frugivory)		herbivory	herbivory			yes	Tanzania														Bycanistes brevis	fruits	yes_final							Journal article
Dietary responses to fruit scarcity of wild chimpanzees at Bossou, Guinea: possible implications for ecological importance of tool use	Yamakoshi, Gen	1998	Predation or mutualism (Frugivory)		phenology, herbivory	herbivory			yes	Guinea														chimpanzee	fruits	yes_final							Journal article
Dietary Variability in Redtail Monkeys (Cercopithecus ascanius schmidti) of Kibale National Park, Uganda: the Role of Time, Space, and Hybridization	Struhsaker, Thomas T.	2017	Predation or mutualism (Frugivory)		herbivory	herbivory			yes	Uganda														Cercopithecus ascanius schmidti	ripe fruits	yes_final							Journal article
Differences in forest structure in relation to energy-efficient cookstoves in the Kakamega forest, Kenya	Edenborg, Fanny	2020			pioneer	habitat	yes		yes	Kenya	NA															yes_final							PhD thesis
Distribution, behavioural biology, rearing and pollination efficiency of five stingless bee species (Apidae: meliponinae) in Kakamega Forest, Kenya	Kiatoko, Nkoba	2012	Mutualism (potential) - Flower visitation (potential pollination)		pollinator, bees	flower visitation			yes	Kenya																yes_final							Journal article
DIVERSITE BIOLOGIQUE DE LA COTE D’IVOIRE	Avit, Jean-Baptiste LF and Pedia, Patrick L<c3><a9>on and Sankar<c3><a9>, Yacouba	1999			distribution	distribution			yes	Cote d'Ivoire	NA															yes_final							Synthesis report
Diversité Floristique Des Ligneux Et Structure Des Formations À Garcinia Kola Heckel Dans Les Régions Du Centre Et De l’Est, Cameroun	Borel, Kamga Yanick and Fran<c3><a7>ois, Nguetsop Victor and Caroline, Momo Solefack Marie and Bernard, Riera	2018			habitat	habitat			yes	Cameroun	Garcinia kola formation	2 (mar-jun, aug-nov)	2 (nov-feb, june-aug)		1500	2000			18-30							yes_final				sols ferallitiques rouge et jaune			Journal article
Diversite floristique sous canopee en plantation forestiere de Mangombe-Edea (Cameroun)	Ngueguim, Jules Romain and Zapfack, Louis and Youmbi, Emmanuel and Riera, Bernard and Onana, Joseph and Foahom, Bernard and Makombu, Judith G	2010			habitat, forest succession	habitat	yes		yes	Cameroun	forest plantation										30					yes_final							Journal article
Diversity and Altitudinal Distribution of Understorey Corticolous Lichens in a Tropical Montane Forest in Kenya (East Africa)	Kirika, Paul M and Ndiritu, George G and Mugambi, George and Newton, Leonard E and Lumbsch, Thorsten	2017			habitat	habitat			yes	Kenya	Supratropical mountain forest										1827					yes_final							Journal article
Diversity And Biomass Variation In Masinde Muliro University Of Science And Technology	Agevi, Humphrey and Wabusya, Moses and Kigen, Charles	2016			habitat	habitat			yes	Kenya	Anthropogenic habitat (botanical garden)										1561					yes_final				dystro-mollic Nitisols			Journal article
Diversity of vascular plants on Ssese islands in Lake Victoria, central Uganda	Ssegawa, Paul and Nkuutu, David N	2006			habitat	habitat			yes	Uganda	forest							>2000	18		0-1260					yes_final							Journal article
Diversity, above-ground biomass, and vegetation patterns in a tropical dry forest in Kimbi-Fungom National Park, Cameroon	Sainge, Moses N. and Nchu, Felix and Townsend Peterson, A.	2020			habitat, abundance	habitat		yes	yes	Cameroun	gallery forest, grassland/woody savannah, secondary forest	1 (apr-oct)	1 (nov-mar)		1824	1958			21-24		429-928					yes_final				ferruginous, brown to gray in color [17], and with an acidity of around pH 5.6			Journal article
Diversity, Ecology, and Conservation of Mauritius Orchids	Baider, Cl<c3><a1>udia and Florens, FB Vincent	2021	Commensalism		epiphyte, habitat	epiphyte			yes	Mauritius	secondary forest															yes_final							Journal article
DNA sequencing reveals high arbuscular mycorrhizal fungi diversity in the rhizosphere soil of Prunus africana trees in fragmented Afromontane forests	Tchiechoua, Yves H and Odee, David W and Ngonkeu, Eddy LM and Kinyua, Johnson and Ngumi, Victoria W and Machuka, Eunice M and Waweru, Bernice and Le Roux, Marcellous and Pelle, Roger	2023			habitat	habitat			yes	Cameroun and Kenya	afromontane			undergrowth							1968					yes_final							Journal article
Does forest tenure influence forest vegetation characteristics? A comparative analysis of private, local and central government forest reserves in central Uganda	Turyahabwe, N and Tweheyo, M	2010			habitat	habitat			yes	Uganda	tropical moist evergreen forests	2 (mar-may, sept-oct)						1320	11-33.3		1110-1250					yes_final							Journal article
Donnees sur la repartition geographique du genre Ravenala et sur son role dans la dynamique forestiere a Madagascar	Hladik, Annette and Blanc, Patrick and Dumetz, Nicolas and Jeannoda, Vololoniaina and Rabenandrianina, Nelson and Hladik, Claude Marcel	2000			habitat, forest succession	habitat	yes		yes	Madagascar	jacheres (savoka)															yes_final							Master thesis
Drivers and Consequences of Animal Foraging Behavior on Seed Dispersal and Plant Community Composition	Luciano, Jadelys	2021	Predation or mutualism (Frugivory)		herbivory	herbivory			yes	Madagascar														Eulemur rubriventer	fruits	yes_final							PhD thesis
Dynamique De La Végétation De Bamo Et Stocks De Carbone Dans La Mosaïque De Végétation	Anobla, Adingra Odette Marie M and N'Dja, Justin Kassi	2016			habitat, forest succession	habitat	yes		yes	Cote d'Ivoire	jacheres															yes_final							Journal article
Dynamique et croissance de l'Okoumé en zone côtière du Gabon	Fuhr, Marc and Del<c3><a8>gue, Marie-Anne and Nasi, Robert and Minkou<c3><a9>, Jean-Marie	1998			habitat, forest succession	habitat	yes		yes	Gabon	savannah, jachere		1 (june-sept)					1745								yes_final				sols pauvres, largement désaturés (somme des bases échangeables < 0,5 meq / 100 g de sol), de pH acide			Synthesis report
Dynamique post-culturale de la végétation dans la presqu'île d'Ampasindava, Domaine du Sambirano, Nord-ouest de Madagascar	Rasoanaivo, N and Tahinarivony, Jacquis A and Ranirison, Patrick and Roger, Edmond and Gautier, Laurent	2015			forest succession	habitat	yes		yes	Madagascar	0-10yrs fallows										323-730					yes_final							Journal article
Early growth improvement on endemic tree species by soil mycorrhizal management in Madagascar	Ramanankierana, H and Baohanta, R and Thioulouse, J and Prin, Y and Randriambanona, H and Baudoin, E and Rakotoarimanga, N and Galiana, A and Rajaonarimamy, E and Lebrun, M	2013	Mutualism (Mycorrhizal association)	Heliophilous pioneer trait and rapid growth	mycorrhize, restoration	mutualism, restoration			yes	Madagascar																yes_final							Book chapter
Early secondary succession on abandoned shifting cultivator's plots in the miombo of South Central Africa	Stromgaard, Peter	1986			forest succession	habitat	yes		yes	Zambia	savannahs, fallow				1000	1400					1300					yes_final				Orthicferralsol (The Food and Agriculture of theUnitedNations)Ustox or Ortho			Journal article
Early succession in the tropical forest in southern Cameroon, Central Africa	Tchiengue, B and Neumann, K and R<c3><bc>diger, W	2020			habitat, pioneer, forest succession	habitat	yes		yes	Cameroun	forest fallow	2 (mar-may, aug-nov)	2 (jun-july, dec-feb)						25							yes_final							Journal article
Early succession on cleared forest land in Ghana	Swaine, Michael D and Hall, John B	1983			pioneer, growth rate	habitat	yes	yes	yes	Ghana	secondary forest							2200	21		750					yes_final							Journal article
Ecological Diversity and Seasonal Adaptations of Mouse Lemurs (Microcebus spp.)	Radespiel, Ute	2006	Predation or mutualism (Frugivory)		herbivory	herbivory			yes	Madagascar															fruits	yes_final							Book chapter
Ecological manipulation of Psidium guajava to facilitate secondary forest succession in tropical forests	Otuoma, John and Nyongesah, John Maina and Owino, Jesse and Onyango, Alice Adongo and Okello, Victor Samuel	2020	Competition	Competition with other heliphilous species	restoration	restoration			yes	Kenya																yes_final							Journal article
Ecological restoration and reforestation of fragmented forests in Kianjavato, Madagascar	Manjaribe, Christophe and Frasier, Cynthia L and Rakouth, Bakolimalala and Louis, Edward E	2013		Heliophilous pioneer trait and rapid growth	pioneer, restoration	restoration	yes		yes	Madagascar	NA							1800	23.4 (16.1-30.7)		52-571					yes_final							Journal article
Ecological restoration in a developing island nation: how useful is the science?	Florens, FB Vincent and Baider, Cl<c3><a1>udia	2013		Heliophilous pioneer trait and rapid growth; nurse tree potential	restoration	restoration			yes	Mauritius																yes_final							Journal article
Ecological studies on the rain forest of Southern Nigeria: III. Secondary succession in the Shasha Forest Reserve	Ross, R	1954			forest succession	habitat	yes		yes	Nigeria	secondary forest (5y)															yes_final							Journal article
Écologie de l’abeille, Apis mellifera unicolor Latreille, dansles écosystèmesforestiers naturels de Ranomafana (Madagascar) et Mare Longue (Réunion) : étude du comportement de butinage et de l’utilisation des ressourcesflorales par approche mélissopalynologique	Rasoloarijao, Tsiory Mampionona	2018	Mutualism (potential) - Flower visitation (potential pollination)		pollinator, bees	flower visitation			yes	Madagascar																yes_final							PhD thesis
Ecologie du paysage en Afrique subsaharienne	Bogaert, Jan and Andre, Marie and Capitale, R<c3><a9>gion Bruxelles	2013			habitat	habitat			yes	RDC	jachere	2 (mar-mai, sept-nov)	2 (dec-fev, june-aout)													yes_final							Journal article
ecologie et population de Rousettus madagascariensis G. Grandidier, 1928 (Pteropodidae)	Andrianaivoarivelo, Radosoa A	2012			pioneer	habitat	yes		yes	Madagascar	forest		1 (june-oct)					2000	14-24		930-1040					yes_final							Journal article
ECOLOGY AND BEHAVIOUR OF THE VERVET MONKEY CERCOPITHECUS AETHIOPS PYGERYTHRUS LOLUI ISLAND, LAKE VICTORIA, UGANDA	LAN, JS GART	1966	Predation or mutualism (Frugivory); Predation (Folivory)		herbivory, herbivory	herbivory			yes	Uganda, Lolui island	forest edge and grassland													Cercopithecus aethiops pygerythrus	fruit and young leaves	yes_final							Journal article
Ecology of Angola: Terrestrial Biomes and Ecoregions	Huntley, Brian John	2023			pioneer	habitat	yes		yes	Angola	disturbed forest															yes_final							Book
Ecology of vascular epiphytes in West African rain forest	Johansson, Dick	1974			habitat	habitat			yes	West Africa	secondary forest										525					yes_final							PhD thesis
Ecosystem services provided by a large endangered primate in a forest-savanna mosaic landscape	Trolliet, Franck and Serckx, Adeline and Forget, Pierre-Michel and Beudels-Jamar, Roseline C and Huynen, Marie-Claude and Hambuckers, Alain	2016	Predation or mutualism (Frugivory)		herbivory, seed characteristics	herbivory			yes	RDC														bonobo	fruits	yes_final							Journal article
Edge effects on the density of Cheirogaleus major	Lehman, Shawn M and Rajaonson, Andry and Day, Sabine	2006			pioneer, habitat	habitat	yes		yes	Madagascar	fallow															yes_final							Journal article
Edible caterpillars and their food plants in Kongo Central Province, Democratic Republic of Congo	Latham, Paul	2021	Undefined		insect host	insect host			yes	RDC																yes_final							Book
Effects of anthropogenic disturbance on the diversity of foliicolous lichens in tropical rainforests of East Africa: Godere (Ethiopia), Budongo (Uganda) and Kakamega (Kenya)	Yeshitela, Kumelachew	2008			habitat	habitat			yes	Uganda, Kenya	young forest stage															yes_final							PhD thesis
EFFECTS OF SAVANNAH CONSERVATION ON THE FLORISTIC DIVERSITY AND STRUCTURE OF SPECIES CHARACTERISTICS OF THE SAVANNAS OF MANZONZI IN DEMOCRATIC REPUBLIC OF CONGO	Mbangilwa, MM and Malotie, JM and Kasoro, RF and Jiang, LC	2020			habitat	habitat			yes	RDC	savannah															yes_final							Journal article
Effects of selective logging on advanced regeneration of timber species in the Asenanyo river forest reserve, Ghana	Boateng, Enoch Owusu	2015			habitat	habitat			yes	Ghana	5 yrs logged forest areas															yes_final							Master thesis
Effets des pratiques culturales sur la banqu de graine du sol dans les recrus post-agricoles d'origine forestiere (RAF) en lisiere ouest du corridor Ranomafana-Andringitra (Fianarantsoa)	Randraimalala, RJ and Randriamboavonjy, JC and Herv<c3><a9>, Dominique and Carri<c3><a8>re, St<c3><a9>phanie M	2014			habitat	habitat			yes	Madagascar	Jacheres de foret							1370	17.7		1100-1250					yes_final				sols ferralitiques rouge et jaune			Book chapter
Enhancing the weaver ant, Oecophylla smaragdina (Hymenoptera: Formicidae), for biological control of a shoot borer, Hypsipyla robusta (Lepidoptera: Pyralidae), in Malaysian mahogany plantations	Lim, Grace T	2007	Undefined		insect host	insect host			yes	Zanzibar																yes_final							PhD thesis
Enriching the landscape: social history and the management of transition ecology in the forest-savanna mosaic of the Republic of Guinea	Fairhead, James and Leach, Melissa	1996			pioneer	habitat	yes		yes	Guinea	secondary forest thicket															yes_final							Journal article
Environmental weeds of the wet tropics bioregion: risk assessment & priority ranking	Werren, Garry L	2001			invasive	habitat - invasive			yes	Australia																yes_final							Report
Espaces forestiers, système de production agraire et dégradation des forêts à Madagascar : L'importance des logiques économiques dans l'aménagement des terroirs.	Salomon, RAMAMONJISOA Bruno	2018			pioneer	habitat	yes		yes	Madagascar	NA															yes_final							Report
Estimation des domaines vitaux et influences des paramètres bioclimatiques sur la distribution spatiale du carnivore endémique Galidia elegans (Geoffroy Saint Hilaire, 1837) au sein d’un fragment de forêt humide de la commune rurale de Kianjavato (Sud-Est de Madagascar).	RASOAMAMPIONONA, Madame Noromalala RAMINOSOA and RAKOTOMANANA, Monsieur Hajanirina and RAZAFINDRAIBE, Madame Hanta and RAKOTONDRAVONY, Monsieur Daniel	2015			habitat	habitat			yes	Madagascar	forest fallow				2527	2566			23							yes_final							Master thesis
Estimation of aboveground biomass and carbon in a tropical rain forest in Gabon using remote sensing and GPS data	Go<c3><af>ta, Kalifa and Mouloungou, Jacques and B<c3><a9>ni<c3><a9>, Goze Bertin	2019			pioneer	habitat	yes		yes	Gabon	NA															yes_final							Journal article
Ethogram and ethnography of Mahale chimpanzees	Nishida, Toshisada and Kano, Takayoshi and Goodall, Jane and McGrew, William C and Nakamura, Michio	1999	Predation or mutualism (Frugivory)		herbivory	herbivory			yes	Tanzania														chimpanzee	fruits	yes_final							Journal article
ETUDE DE LA DIVERSITE ET DETERMINANTS DES STRUCTURES ET CORTEGES D’ESPECES PRESENTS SUR LES PARCELLES AGROFORESTIERES DE GIROFLIERS DU VILLAGE DE VOHIBARY AU NORD-EST DE MADAGASCAR	Roura, Nicolas	2019			habitat	habitat			yes	Madagascar	agroforestry system (girofle plantation)															yes_final							Master thesis
ETUDE DE LA TRAJECTOIRE DE LA SUCCESSION VEGETALE NATURELLE D’AMBATOVY EN VUE DE METTRE EN PLACE UN PLAN DE RESTAURATION FORESTIERE	Michelle, RAMANANTSARA Faranirina Nadine	2008		Heliophilous pioneer trait and rapid growth; Improve/indicate soil fertility	forest succession, restoration	restoration	yes		yes	Madagascar																yes_final							Master thesis
Étude de la végétation d’un canal artificiel de navigation soumis aux pressions anthropiques, la rivière Assinie, Côte d’Ivoire	OUATTARA, M<c3><a9>vanly and TI<c3><89>BR<c3><89>, Marie-Solange and N<e2><80><99>GUESSAN, Kouakou Edouard	2017			habitat	habitat			yes	Cote d'Ivoire	foret ripicole				1800	2000										yes_final							Journal article
Etude des pluies polliniques de la Région Boeny et des autres formations végétales malgaches	DEA, MEMOIRE DE DIPLOME DÃ¢â‚¬â„¢ETUDES APPROFONDIES	2015			habitat	habitat			yes	Madagascar	savoka															yes_final							Master thesis
ETUDE DES SUCCESSIONS VEGETALES DES FORETS BRULEES DU TAMPOKETSA D’ANKAZOBE POUR LA RESTAURATION DE LA FORET D’ANKAFOBE	Arilala, ROBISOA Mirana	2010		Heliophilous pioneer trait and rapid growth	pioneer, restoration	restoration	yes		yes	Madagascar																yes_final							Master thesis
Étude du comportement de Baillonella toxisperma Pierre (moabi) dans les trouées d'abattage enrichies	Kouadio, Yao Lambert and Doucet, Jean-Louis	2009	Competition	Heliophilous pioneer trait and rapid growth; Competition with other heliphilous species	habitat, growth, competition	restoration		yes	yes	Cameroun	forest plantation of B. toxisperma	2 (aug-nov, mar-june)	2 (dec-feb, july)					1650			600-760					yes_final				sols ferrallitiques rouges ou jaunes typiques (sols pauvres, acides et fragiles)			Journal article
ETUDE ET MODELISATION DE LA PRODUCTIVITE DES SYSTEMES DE CULTURE BASES SUR LE SEMIS DIRECT SOUS COUVERT VEGETAL DANS LA SAVANE DU SUD-OUEST DE LA REPUBLIQUE DEMOCRATIQUE DU CONGO, “ CAS DE MVUAZI ”	Khonde, Gertrude Pongi	2021			habitat	habitat			yes	RDC	jachere forestiere								24							yes_final							PhD thesis
Etude floristique et diversite de la foret des Marais Tanoe-Ehy (Sud-Est de la Cote d'Ivoire)	Missa, Koffi and Ouattara, DoudjoN and Kon<c3><a9>, Moussa and Bakayoko, Adama	2015			habitat	habitat			yes	Cote d'Ivoire	Swamp forest							1400-1600	22-30 (26 average)		10-12m		yes			yes_final				hydromorphic soil			Journal article
ETUDES ECOLOGIQUES DE SIX ESPECES ENDEMIQUES ET MENACEES (Dalbergia baronii Baker., D. monticola Bosser & Rabev., D. chapelieri Baill., D. orientalis Bosser & Rabev., Masoala kona Beentje et Ravenea dransfieldii Beentje) DANS LA PARTIE ORIENTALE DU CORRIDOR (RANOMAFANA-ANDRINGITRA)	Zo, RAMAMONJY Hary and Raymond, Ing<c3><a9>nieur RABEVOHITRA	2006			habitat	habitat			yes	Madagascar	secondary forest															yes_final							Master thesis
Evaluation and flora diversity of Gashaka Gumti National Park-1, Gashaka Sector, Taraba State, Nigeria	Akinsoji, A and Adeonipekun, PA and Adeniyi, TA and Oyebanji, OO and Eluwole, TA	2016			habitat	habitat			yes	Nigeria	lowland and submontane forest							1973								yes_final							Journal article
Evaluation of land reclamation practices at Anglogold Ashanti, Iduapriem Mine Ltd, Tarkwa	Tetteh, Erasmus Narteh	2010			habitat, pioneer	habitat	yes		yes	Nigeria	secondary forest															yes_final							PhD thesis
Evolution des paramètres floristiques au cours de la dynamique post culturale dans les jachères du site Bibara dans le Parc National de la Ruvubu (Burundi)	Bangirinama, Fr<c3><a9>d<c3><a9>ric and Masharabu, Tatien and Bigendako, Marie-Jos<c3><a9> and Lejoly, Jean and De Canni<c3><a8>re, Charles and Bogaert, Jan	2009			forest succession	habitat	yes		yes	Burundi	jachere							1367	19.5		1600					yes_final							Journal article
Évolution naturelle des savanes mises en défens à Ibi-village, sur le plateau des Bateke, en République Démocratique du Congo	Lubalega, TolÃƒÂ©rant	2016			forest succession	habitat	yes		yes	RDC	savannah							1500	24.5	80						yes_final				sols ferrallitiques			PhD thesis
Exotic guavas are foci of forest regeneration in Kenyan farmland	Berens, Dana Gertrud and Farwig, Nina and Schaab, Gertrud and B<c3><b6>hning<e2><80><90>Gaese, Katrin	2008	Competition	Competition with other heliphilous species	pioneer, competition invasive	restoration	yes		yes	Kenya	NA															yes_final							Journal article
Farmer managed natural regeneration in Kenya	Wanjira, ERICK OTIENO and Muriuki, JONATHAN and Ojuok, IRENE	2020			habitat	habitat			yes	Kenya	afromontane rain forest															yes_final							Report
Farmers' perceptions about the utilities of trees associated with coffee farms in central province, Kenya	Elliott, LC	2009		Bio-control agent; Economic potential (e.g. honey production)	biocontrol agent, retoration benefit	restoration			yes	Kenya																yes_final							Master thesis
Fecal bacterial diversity of human-habituated wild chimpanzees (Pan troglodytes schweinfurthii) at Mahale Mountains National Park, Western Tanzania	Szekely, Brian A and Singh, Jatinder and Marsh, Terence L and Hagedorn, Charles and Werre, Stephen R and Kaur, Taranjit	2010	Predation or mutualism (Frugivory); Predation (Folivory)		herbivory, herbivory	herbivory			yes	Tanzania														chimpanzee	fruits or leaves	yes_final							Journal article
Flora of Sango Bay and Minziro, two important plant areas on the Uganda/Tanzania	Luke, Quentin and Vollesen, Kaj and Festo, Lenin and Beentje, Henk and Kalema, James and Richards, Sophie L	2023			habitat, pioneer	habitat	yes		yes	Uganda, Tanzania	forest margin															yes_final							Book
Floral Resources of key Afromontane Tree Species Predict Sunbird Distribution and Abundance in Ngel Nyaki Forest, Taraba State-Nigeria	Nsor, Charles Ayuk and Chapman, Hazel M and Godsoe, William and Aliyu, Amina Haruna	2021	Mutualism (potential) - Flower visitation (potential pollination)		nectarivorous	flower visitation			yes	Nigeria																yes_final							Journal article
Floristic and phytogeographycal analysis of coastal and subcoastal vegetation in the Kouilou Department (Republic of Congo)	Miabangana, Edmond Sylvestre and Nsongola, Gilbert and Orban, Ben and Van Rooyen, Margaretha and Van Rooyen, Noel and Gaugris, Jerome Yves	2017			distribution	distribution			yes	RDC																yes_final							Journal article
Floristic and structural characteristics of remnant littoral forest sites in the Tolagnaro area	Rabenantoandro, Johny and Randriatafika, Faly and Lowry, PP	2007			habitat	habitat			yes	Madagascar	littoral forest (dense, low–elevation evergreen humid forest)															yes_final							Report
Floristic and structure of fallow vegetation	Ubom, RM and Ogbemudia, FO and Ita, RE	2012			forest succession, crown	forest succession, crown			yes	Nigeria	fallow	1 (may-oct)	1 (nov-apr)		2000	3000			25.6-28	75-85						yes_final							Journal article
Floristic Composition and Diversity in a Restored Community-Based Forest, Otun Ekiti, Ekiti State, Nigeria	Olajuyigbe, SO and Omole, KO and Bankole, PO	NA			habitat, basal area, density	habitat, basal area, density			yes	Nigeria	forest	1 (apr-oct)	1 (nov-mar)						21-28		300-450					yes_final							Journal article
Floristic composition, diversity and structure of the rainforest in the mayoko district, republic of Congo	van Rooyen, Margaretha W and van Rooyen, Noel and Miabangana, Edmond S and Nsongola, Gilbert and Gaugris, Caroline Vasicek and Gaugris, J<c3><a9>r<c3><b4>me Y	2019			habitat, forest succession	habitat, forest succession			yes	Congo	degraded forest, young secondary forest, swamp forest, forest fallow	2 (sept-june, dec-jan)	1 (june-sept)					1800	22							yes_final							Journal article
Floristic diversity under anthropogenic activities in the protected forests of Duekou and Scio in southwestern Cote dIvoire	KOUAME, Francois Nguessan and AHIMIN, Olivier Adje and BORAUD, Maxime Ntakpe Kama and NGUESSAN, Edouard Kouakou	2015			pioneer	pioneer			yes	Cote d'Ivoire	plantation				1600			1600-1800	25							yes_final							Journal article
Floristic study of Lwampango relict forest in Kaziba chiefdom, South Kivu Province, DR Congo	Mubembe, Senior Diop Ndeko and Karhagomba, Innocent Balagizi and Fakage, John Nihoreye and Bararunyeretse, Prudence and Ntiharirizwa, Seconde and Mihingano, Eric Mushagalusa and Masharabu, Tatien and Nkengurutse, Jacques	2021			habitat, dbh, density	habitat, dbh, density			yes	RDC		1 (Sept-may)	1 (june-aug)				2300-2700	1500	17-18							yes_final							Journal article
Floristics of Gabon's Batéké Plateaux: Guineo-Congolian plants on Kalahari Sands	Walters, GRETCHEN and Bradley, ADAM and Niangadouma, RAOUL	2006			habitat, forest succession	habitat, forest succession			yes	Gabon	grassland-forest transition															yes_final							Journal article
Forest fragmentation and its associated edge-effects reduce tree species diversity, size, and structural diversity in Madagascar's transitional forests	Hending, Daniel and Randrianarison, Heriniaina and Andriamavosoloarisoa, Niaina Nirina Mahefa and Ranohatra-Hending, Christina and Holderied, Marc and McCabe, Grainne and Cotton, Sam	2023		Heliophilous pioneer trait and rapid growth	heliophilous	heliophilous			yes	Madagascar	forest edge															yes_final							Journal article
Forest land use and native trees diversity conservation in Togolese mega hotspot, Upper Guinean, West Africa	Adjossou, Kossi and Ay<c3><83>, Fifonsi and Abotsi, Komla Elikplim and Koda, Donko Koudzo and Guelly, Atsu Kudzo and Kokou, Kouami	2019			pioneer	pioneer			yes	Togo	fallow, coffee plantation, rare in forest relict				1250	1900			21-25							yes_final							Journal article
Forest progression modes in littoral Congo, central atlantic Africa	Favier, Charly and De Namur, Christian and Dubois, Marc<e2><80><90>Antoine	2004			habitat	habitat			yes	Congo	savannah	1 (oct-apr)	1 (may-june)					1200	25		60-130					yes_final							Journal article
Forest restoration in Eastern Madagascar: Post-fire survival of select Malagasy tree species	Hill, Donald Matthew	2018		Highly resilient species (to fire, grazing, etc.)	restoration	restoration			yes	Madagascar																yes_final							Master thesis
Forest type influences population densities of nocturnal lemurs in Manompana, northeastern Madagascar	Miller, Alex and Mills, Harriet and Ralantoharijaona, Tantely and Volasoa, Nicole Andriaholinirina and Misandeau, Chantal and Chikhi, Loun<c3><a8>s and Bencini, Roberta and Salmona, Jordi	2018	Predation or mutualism (Frugivory)		herbivory, forest succession, habitat	herbivory, forest succession, habitat			yes	Madagascar	young and old savoka (3-4. 15y), regenerating secondary forest													Avahi laniger	fruits	yes_final							Journal article
Fragments and food: red-tailed monkey abundance in privately owned forest fragments of Central Uganda	Baranga, Deborah and Chapman, Colin A and Mucunguzi, Patrick and Reyna-Hurtado, Rafael	2013			herbivory	herbivory			yes	Uganda														Cercopithecus ascanius	NA	yes_final							Journal article
Frugivores, seed dispersal and tree regeneration along a human disturbance gradient in East African tropical rainforests	Kirika, Jasper Mbae	2007			herbivory, pioneer	herbivory, pioneer			yes	Uganda, Kenya	disturbed forest (selectively logged)							1200-2100			1100-1650			animal	NA	yes_final							PhD thesis
Gestion des feux de brousse sur le versant guineen des monts Nimba.	Poilecot, Pierre	2008			pioneer	pioneer			yes	Guinea																yes_final							Project report
Gestion environnementale de la foret classee de Missahoe au Togo	SEBABE, Agoro	2004			pioneer, forest succession	pioneer, forest succession			yes	Togo								1750	22.6-26.3	40-99	400-800					yes_final							Report
Global Reforestation Assessment: A Case Study of Reforestation and Species Survival in a Southeastern Madagascar Community	King, Eleanor	2023		High survival rate of seedling	restoration	restoration			yes	Madagascar																yes_final							PhD thesis
Grassland trees and the common bulbul Pycnonotus barbatus promote Afromontane forest restoration	Jaafar, Ridwan and Yadok, Biplang G and Elisha, Emmanuel B and Chapman, Hazel M	2021	Predation or mutualism (Frugivory)	Nurse tree potential	herbivory, restoration	herbivory, restoration			yes	Nigeria														Pycnonotus barbatus	fruits	yes_final							Journal article
Ground-based validation of the MODIS leaf area index product for east African rain forest ecosystems	Kraus, Tanja	2008			habitat	habitat			yes	Uganda, Kenya	young secondary forest															yes_final							Master thesis
Habitat and host-plant genotype effects on seasonal dynamics of a neotropical predatory mite on cassava in the mid-altitudes of Cameroon	ZUNDEL, Christine and NAGEL, Peter and HANNA, Rachid and KORNER, Fr<c3><a4>nzi and SCHEIDEGGER, Urs	2007			habitat	habitat			yes	Cameroun	riparian forest															yes_final							Journal article
Habitat et régénération des espèces ligneuses les plus utilisées par la communauté Zafimaniry	les membres de Jury, Devant	2015			habitat	habitat			yes	Madagascar	savoka															yes_final							Master thesis
Habitats du Parc National de la Ruvubu au Burundi	Nzigidahera, Beno<c3><ae>t and Mbarushimana, D and Habonimana, B and Habiyaremye, F	2020			habitat	habitat			yes	Burundi	bosquet, foret claire, gallery forest															yes_final							Report
High bird species diversity in structurally heterogeneous farmland in western Kenya	Mulwa, Ronald K and B<c3><b6>hning<e2><80><90>Gaese, Katrin and Schleuning, Matthias	2012			habitat	habitat			yes	Kenya	secondary forest							2007	10.6-27.7							yes_final							Journal article
Impact de la gestion de la matière organique sur le statut minéral des sols et des récoltes dans les savanes soudano-guinéennes de Ngaoundéré, Cameroun	Ibrahima, Adamou and Fanta, Chimene Abib and Ndjouenkeu, Robert and Ntoupka, Mama	2009			forest succession	forest succession			yes	Cameroun	jachere							1400	23	70	1000					yes_final							Colloquium article
Impact of habitat disturbance in the wetland forests of East Usambara, Tanzania	Senzota, Ramadhani and Mbago, Frank	2010			habitat, density	habitat, density			yes	Tanzania	wetland forest			shrub							990-1082					yes_final							Journal article
Impact of Land Use Changes on Diversity, Community Structure and Natural Regeneration of Woody Plant Species in a Moist Semi-Deciduous Forest	Nartey, Akwetey Okoe	2013			habitat	habitat			yes	Ghana	disturbed forest and abandonned mined site															yes_final							Master thesis
Impacts de l'urbanisation sur quelques écosystèmes forestiers de la ville de Douala	Nganmo, Ivant Stevy and Priso, Richard Jules	2022			habitat	habitat			yes	Cameroun	NA	1 (mar-nov)	1 (dec-feb)					4000	26		10					yes_final							Journal article
Impacts of trees species and functional traits on birds visitation in a Nigerian montane forest: Implications for conservation: Trees Functional Traits and Birds Visitation	Buba, Toma and Jaafar, Ridwan Muhammad	2021	Predation or mutualism (Frugivory)		herbivory	herbivory			yes	Nigeria														African stonechat, Baglafecht weaver, Black bee-eater, Common bulbul, green-headed sunbird, Red-eyed dove, Viellot's black weaver, Village weaver, Yellow bishop (4 frugivores)	fruits	yes_final							Journal article
Individual based networks reveal the highly skewed interactions of a frugivore mutualist with individual plants in a diverse community	Tonos, Jadelys and Razafindratsima, Onja H and Fenosoa, Zo Samuel Ella and Dunham, Amy E	2022	Predation or mutualism (Frugivory)		herbivory	herbivory			yes	Madagascar														Eulemur rubrivente	fruits	yes_final							Journal article
INFLUENCE DE L’AGROFORESTERIE SUR LA SÉQUESTRATION DU CARBONE ET LA DYNAMIQUE DE L’AZOTE ET DU PHOSPHORE DISPONIBLES DES SOLS FERRALLITIQUES : CAS DES REGIONS ITASY, ALAOTRA-MANGORO ET ANALANJIROFO DE MADAGASCAR	NathanaÃƒÂ«l, Fitahiana	2021			habitat	habitat			yes	Madagascar	Clove plantation															yes_final							PhD thesis
Influence des pratiques culturales et du milieu sur la diversité des jachères d'origine forestière (Hautes-Terres, Madagascar)	Randriamalala, RJ and Serpanti<c3><a9>, Georges and Carri<c3><a8>re, St<c3><a9>phanie M	2007			pioneer, forest succession	pioneer, forest succession			yes	Madagascar	recrus arbustif, recrus arbores	1 (nov-mar)						1370	17.7		1100-1250					yes_final				sols ferralitiques rouge et jaune sur rouge			Journal article
Influence of anthropogenic disturbance on the diversity of flora and vegetation of Cyamudongo rainforest, the adjacent forestry plots and the Western Nyungwe main forest block	Nsanzurwimo, Aimable	2021			distribution	distribution			yes	Rwanda	NA															yes_final							PhD thesis
Influence of vegetation characteristics on nutrient loss in the rainforest belt of Agoi-Ekpo, Cross River State, Nigeria	Iwara, AI and Njar, GN and Ogundele, FO and Tokula, AE	2018			forest succession	forest succession			yes	Nigeria	fallow 3y															yes_final							Journal article
Installation des placettes permanentes à but pédagogique pour le suivi de la croissance des peuplements forestiers d’Okoumé : Analyse des résultats préliminaires	Mengome Ango, Armand Yvon	2007			habitat	habitat			yes	Gabon	NA				3000	3500			25		0-41					yes_final				sols très sablonneux, de couleur grise, profonds, et de fertilité médiocre. acides et déssaturés avec tendance à la podzolisation.			Master thesis
Installation d'un couvert forestier dans les jachères de savane au sud-ouest Togo	Guelly, Kutzo-Atsu and Roussel, Bernard and Guyot, Michel	1993			pioneer, forest succession	pioneer, forest succession			yes	Togo	jachere from savannah and forest (4-6 yrs mostly) decreasing afterwards	1 (mar-oct)	1 (nov-feb)		1400	1600										yes_final							Journal article
Integrated taxonomic revision of Afrotropical Xyleborinus (Curculionidae: Scolytinae) reveals high diversity after recent colonization of Madagascar	Eliassen, Jonas M and Jordal, Bjarte H	2021	Undefined		insect host	insect host			yes	Madagascar																yes_final							Journal article
Integrating remote sensing data and rapid appraisals for land?cover change analyses in Uganda	Vogt, Nathan and Bahati, Joseph and Unruh, Jon and Green, Glen and Banana, Abwoli and Gombya<e2><80><90>Ssembajjwe, William and Sweeney, Sean	2006			pioneer	pioneer			yes	Uganda	cleared grassland															yes_final							Journal article
Integration of Biodiversity into the Forestry Sector in the Democratic Republic of Congo (DRC)	Luhunu Kitsidikiti, S and Kiyulu N<e2><80><99>yanga-Nzo, J	2001			habitat	habitat			yes	RDC	secondary forest															yes_final							Conference paper
Interactions between ants and non-myrmecochorous diaspores in a West African montane landscape	Agaldo, Jennifer A and Christianini, Alexander V and Chapman, Hazel M	2021	Mutualism (Myrmecochory)		insect, seed dispersal	insect, seed dispersal			yes	Nigeria																yes_final							Journal article
Interactions between people and forest elephants (Loxodonta cyclotis): the case of Campo-Ma'an National Park, southern Cameroon	Djoko, Isaac Blaise	2022	Predation (Florivory and Stem damage)		herbivory	herbivory			yes	Cameroun															leaves and stem	yes_final							PhD thesis
Introduced and invasive plants	Binggeli, Pierre	2003			pioneer	pioneer			yes	Madagascar	NA															yes_final							Journal article
Inventaire floristique de la forêt sacrée de Wuya dans la province du Kongo-central en République Démocratique du Congo	KITOKO, Ruffin NSIELOLO and NZO, Bernadin Jo<c3><a9>l KIYULU N<e2><80><99>YANGA and MUKWELA, Rodrique NDUNGU	2020			habitat, forest succession	habitat, forest succession			yes	RDC	jachere et lisiere							1100-1612	25		604					yes_final							Journal article
Inventory of the vegetation structure and food availability for the Western chimpanzee (Pan troglodytes verus) in the Boé region, Guinea-Bissau.	WU, Ignas Heitk<c3><b6>nig and Goedmakers, Annemarie	2014	Predation or mutualism (Frugivory)		herbivory	herbivory			yes	Guinea-bissau														Pan troglodytes verus	fruits	yes_final							Internship report
LA GESTION DES ECOSYSTEMES FORESTIERS DU CAMEROUN A L’AUBE DE L’AN 2000	NEMBOT, Timoth<c3><a9>e FOMETE and TCHANOU, Zach<c3><a9>e	1998			pioneer	pioneer			yes	Cameroun	NA															yes_final							Report
La gestion du risque érosif cyclonique par les Tanala (Madagascar). Opportunités et limites des techniques traditionnelles pour l’adaptation au changement climatique	Serpanti<c3><a9>, Georges and RAKOTONIRINA, Lovatiana Albert	2012			soil fertility	soil fertility			yes	Madagascar																yes_final							Journal article
La reconstitution de la foret tropicale humide sud-ouest de la Cote d'Ivoire	Kahn, Francis	1982			forest succession	forest succession			yes	Cote d'Ivoire	NA															yes_final							Book
LA REGENERATION PAR GRAINES ET PAR MULTIPLICATION VEGETATIVE A FAIBLE COÛT (DRAGEONS ET BOUTURES DE SEGMENTS DE RACINE)	Bellefontaine, Ronald	2018		Low-cost restoration potential	restoration	restoration			yes																	yes_final							Report
La reserve de Conkouati, Congo: le secteur sud-ouest	Doumenge, Charles	1992			habitat, forest succession	habitat, forest succession			yes	Congo	secondary forest, recrus forestiers, border savannah-forest															yes_final							Book
La structure de la forêt galerie de la vallée de la cascade de Dindéféllo, Sud-est du Sénégal	Goudiaby, Assane and Sambou, Bienvenu and B<c3><a2>, Amadou Tidiane and Mbow, Cheikh	2004			habitat, forest succession	habitat, forest succession			yes	Senegal	gallery forest							1200			220-400					yes_final							Journal article
Land classification for management planning in the Luangwa Valley of Zambia	Astle, WL and Webster, R and Lawrance, CJ	1969			habitat	habitat			yes	Zambia	riparian forest							832	25		400-1000					yes_final				reddish-brown fersiallitic			Journal article
Land cover changes of Atewa Range Forest Reserve, a biodiversity hotspot in Ghana	Amponsah, A and Nasare, L.I. and Tom-Dery, D and Baatuuwie, B.N.	2022			habitat	habitat			yes	Ghana	upland evergreen forest				1200	1600			24-29		500-750					yes_final							Journal article
Land crisis on the Mambila plateau of Nigeria, West Africa	Hurault, Jean	1998		Highly resilient species (to fire, grazing, etc.)	pioneer, forest succession	pioneer, forest succession, restoration			yes	Nigeria	NA															yes_final							Journal article
Land-use Management and the Conversation of Endemic Species in the Island of São Tomé	de Lima, Ricardo Faustino	2012			habitat	habitat			yes	Sao Tome	secondary forest and shade plantations															yes_final							PhD thesis
LE CHOIX DES PLANTES NOURRICIÈRES ET LA SPÉCIALISATION TROPHIQUE CHEZ LES ACRIDOIDEA (ORTHOPTERES)	Philippe, LE	1989	Undefined		insect host	insect host			yes	Cote d'Ivoire	lisiere et plantations															yes_final							Journal article
Les abeilles du genre Xylocopa Latreille (Hymenoptera: Apoidea: Apidae) au Burundi, de bons pollinisateurs des legumineuses	Pauly, Alain and Nzigidahera, Beno<c3><ae>t and Eardley, Connal and NDAYIKEZA, Longin and MPAWENIMANA, Alexis and HABONIMANA, Bernadette	2015	Mutualism (potential); Flower visitation (potential pollination)		pollination, insect host	pollination, insect host			yes	Burundi																yes_final							Journal article
Les agro-forêts à girofle de Madagascar : une construction récente, autour d’espèces végétales introduites	Fawbush, F and JM, Leong Pock Tsy	2019			habitat, forest succession	habitat, forest succession			yes	Madagascar	systeme agroforestier, girofle plantation															yes_final							Conference paper
LES AGROfORÊTS MVAE ET YASSA DU CAMEROUN LITTORAL: fonctions socioculturelles, structure et composition floristique	Dounias, Edmond and Hladik, Claude Marcel	1996			habitat, forest succession	habitat, forest succession			yes	Cameroun	agroforest															yes_final							Book chapter
Les Arbres, Arbustes el Arbrisseaux conservés comme Ombrage naturel dans les plantations de Caféiers indigènes de la Région de Macenta (Guinée …	Porteres, Roland	1949	Predation or mutualism (Frugivory)		herbivory, habitat, invasive, pioneer	herbivory, habitat, invasive, pioneer			yes	Guinea	savannah, cultures, jacheres													Birds	fruits	yes_final							Journal article
Les bois de tapia de Madagascar: approches phytogeographique, floristique et ecologique	Rakotoniaina, Naritiana and RakotondRasoa, Olivia L and RatsimBa, Harifidy R	2013	Undefined		insect host	insect host			yes	Madagascar																yes_final							Book chapter
Les formations a Harungana madagascariensis dans les jacheres du plateau Akposso (Togo)	Guelly, KA and Puig, Henri and Woegan, Agbelessessi Y and KOUKOU, K	2000			forest succession	forest succession			yes	Togo	jacheres de foret (18-72 months) et de savannes (20-144 months)							1400-1600			>500					yes_final							Journal article
Les indicateurs de la dynamique post-culturale de la végétation des jachères dans la partie savane de la réserve naturelle forestière de Kigwena (Burundi)	Bangirinama, Fr<c3><a9>d<c3><a9>ric and Bigendako, Marie Jos<c3><a9> and Lejoly, Jean and Noret, Nausicaa and De Canni<c3><a8>re, Charles and Bogaert, Jan	2010			habitat, forest succession	habitat, forest succession			yes	Burundi	jacheres of 5yrs (evolved in shrubby savannah), savannah															yes_final							Journal article
Les jachères de savane sur le plateau Akposso au sud-ouest du Togo	GUELLY, Kudzo Atsu	1993			forest succession	forest succession			yes	Togo	jacheres (young abandonned savannahs 4-6yrs)							1400-1600			>500					yes_final							Journal article
Les peuplements d'okoumés au Gabon. Leur dynamique et croissance en zone côtière	Nasi, Robert	1997			habitat, forest succession	habitat, forest succession			yes	Gabon	abandonned farmland, savannah															yes_final							Journal article
LES PRODUITS FORESTIERS NON LIGNEUX : CONTRIBUTION AUX ÉCONOMIES NATIONALES ET STRATÉGIES POUR UNE GESTION DURABLE	Ingram, Verina and Ndoye, Ousseynou and Iponga, Donald Midoko and Tieguhong, Julius Chupezi and Nasi, Robert	2010			habitat	habitat			yes	Cameroun	Forêts denses humides de basse altitude															yes_final							Book chapter
Linking historical land use to present vegetation and soil characteristics under slash-and-burn cultivation in Madagascar	Randrianarison, Andry and Schlaepfer, Rodolphe and Mills, Robert and Herv<c3><a9>, Dominique and Razanaka, Samuel and Rakotoarimanana, Vonjison and Carri<c3><a8>re, St<c3><a9>phanie M and Buttler, Alexandre	2016			habitat, forest succession	habitat, forest succession			yes	Madagascar	fallow 0-10y	1 (oct-mar)	1 (1apr-sept)		1600	2000			17.7-28		579-1269					yes_final							Journal article
Long-term permanent plot observations of vegetation dynamics in Budongo, a Ugandan rain forest	Sheil, Douglas and Jennings, Stephen and Savill, Peter	2000			forest succession	forest succession			yes	Uganda	early successional forest	2 (Sept-nov, Mar-may)			1200	1800					1000-1100					yes_final							Journal article
Lowland vegetation on the 1922 lava flow, Cameroons Mountain	Keay, Ronald William John	1959			forest succession	forest succession			yes	Cameroun	early successional forest, abandonned farmland							9495	21.5-30.5		0-30					yes_final							Journal article
Maesopsis eminii and its status in the East Usambara Mountains	Hall, John B	1995		Heliophilous pioneer trait and rapid growth; nurse tree potential	restoration	restoration			yes	Tanzania																yes_final							Technical report
Maintaining the Conservation Value of Shifting Cultivation Landscapes Requires Spatially Explicit Interventions	Robiglio, Valentina and Sinclair, Fergus	2011			disturbance indicator, habitat	disturbance indicator, habitat			yes	Cameroun	grassland, herbaceous fallow															yes_final							Journal article
Malaxideae (Orchidaceae) in Madagascar, the Mascarenes, Seychelles and Comoro Islands	Hermans, Johan and Verlynde, Simon and Cribb, Phillip and Ramandimbisoa, Brigitte and Hervouet, Jean-Michel and Bernet, Patrice	2020	Commensalism		epiphyte, habitat	epiphyte, habitat			yes	Madagascar, Mascarene, Seychelles and Comoros																yes_final							Journal article
Mapping habitat-types within the Hummingbird site at Dugbe (Liberia, West Africa)	Senterre, Bruno	2014			habitat	habitat			yes	Liberia	Post-cultural secondary vegetation															yes_final							Report
Mauritius since the last glacial: environmental and climatic reconstruction of the last 38 000 years from Kanaka Crater	Van Der Plas, Geert W and De Boer, Erik J and Hooghiemstra, Henry and Vincent Florens, FB and Baider, Claudia and Van Der Plicht, Johannes	2012			habitat	habitat			yes	Mauritius	Moist forest				2000	2600					400-850					yes_final							Journal article
MECHANISMS OF LAND-COVER CHANGE IN UGANDA: LONGER-TERM ANALYSES OF THE ROLE OF INSTITUTIONAL ARRANGEMENTS	Vogt, Nathan D and Gombya-Ssembajjwe, William and Banana, Abwoli and Bahati, Joseph	2005			forest succession, basal area	forest succession, basal area			yes	Uganda	cleared grassland															yes_final							PhD thesis
Mise en place d'un état de référence et d'un plan de suivi écologique permanent des vestiges de forêt primaire de la station forestière de Mandraka	Rajaonera, Mirana Lolontiana and Rajoelison, Lalanirina Gabrielle and Rabenilalana, Fetra Mihajamanana and Rakoto Ratsimba, Harifidy	2008			habitat	habitat			yes	Madagascar	secondary forest															yes_final							Master thesis
Misreading the African landscape: society and ecology in a forest-savanna mosaic	Fairhead, James and Leach, Melissa	1996			habitat, pioneer, forest succession	habitat, pioneer, forest succession			yes		secondary forest thicket, transition woodland between forest and savannah															yes_final							Book
Mistletoes and their diversity in the Bwindi Impenetrable National Park, Uganda	Kamusiime, Emilly and Sheil, Douglas	2021	Predation (parasitism)		parasite host, epiphyte	parasite host, epiphyte			yes	Uganda																yes_final							Journal article
Mobilizing Farmers’ Knowledge of the Soil	Rakotoson, Domoina J. and Rakotonirina, Lovatiana A. and Serpanti<c3><a9>, Georges	2010		Improve/indicate soil fertility	soil fertility	restoration, soil fertility			yes	Madagascar																yes_final							Book chapter
Modelling diameter growth, mortality and recruitment of trees in miombo woodlands of Tanzania	Mugasha, Wilson A and Eid, Tron and Bollands<c3><a5>s, Ole M and Mbwambo, Lawrence	2017			growth, habitat	growth, habitat			yes	Tanzania	NA															yes_final							Journal article
Modern pollen-vegetation relationships in Ghana, tropical West Africa	Julier, Adele Charlotte Mary	2018			habitat	habitat			yes	ghana	Guineo Congolian short forest and shrub forest, Secondary Guineo Congolian rain forest				1200	2000										yes_final							PhD thesis
MUTATIONS SOCIO-ÉCONOMIQUES ET GESTION DURABLE DU MASSIF FORESTIER DE NGOYLA - MINTOM	Tagne, Claude Tatuebu	2019			pioneer	pioneer			yes	Cameroun	jachere															yes_final							PhD thesis
Mycorrhizal Fungi and Reforestation in an Eastern Lowland Rainforest of Madagascar	Gibby, Sophia	2023	Mutualism (Mycorrhizal association)		mycorrhize, restoration	mycorrhize, restoration			yes	Madagasscar																yes_final							Master thesis
Mycorrhizal status of native trees and shrubs from eastern Madagascar littoral forests with special emphasis on one new ectomycorrhizal endemic family, the Asteropeiaceae	Ducousso, Marc and Ramanankierana, Heriniaina and Duponnois, Robin and Rab<c3><a9>vohitra, Raymond and Randrihasipara, Laurent and Vincelette, Manon and Dreyfus, Bernard and Prin, Yves	2008	Mutualism (Mycorrhizal association)		mycorrhize, restoration	mycorrhize, restoration			yes	Madagascar																yes_final							Journal article
National weeds program, potential environmental weeds in Australia, Candidate species for preventative control	Csurhes, S and Edwards, R	1998			invasive	invasive			yes	Australia																yes_final							Report
Natural and experimental establishment of trees in the edges of a fragmented forest, Ambohitantely Forest Reserve, Madagascar	Pareliussen, Ingar	2004		Heliophilous pioneer trait and rapid growth	restoration, habitat, forest succession	restoration, habitat, forest succession			yes	Madagascar	forest edge and grassland							1823	16.5 (13.5-23.7)		1300-1650					yes_final							Journal article
Natural plant revegetation on three reclaimed gold mined sites in South Western Ghana	Essandoh, Paul K. and Bryant, Isaac Mbir and Takase, Mohammed	2023			pioneer, abundance	pioneer, abundance			yes	Ghana	reclaimed gold mine sites under restoration							1870	26-30							yes_final							Journal article
Nutrient composition of foodstuffs available to wild lemurs living in the Analamazaotra Special Reserve, eastern Madagascar, and a survey of diets fed to captive black-and-white ruffed lemurs at United States zoological institutions	Donadeo, Brett	2013	Predation or mutualism (Frugivory); Predation (Folivory)		herbivory	herbivory			yes	Madagascar														Varecia variegata	fruits and leaves	yes_final							Master thesis
Observations on the pilot control of Senna spectabilis, an invasive exotic tree in the Mahale Mountains National park, Western Tanzania	Wakibara, James V	1998			pioneer	pioneer			yes	Tanzania	NA															yes_final							Journal article
Old Timber Plantations and Secondary Forests Attain Levels of Plant Diversity and Structure Similar to Primary Forests	Brown, Hugh C Adokwei and Appiah, Mark and Berninger, Frank	2022			pioneer	pioneer			yes	Ghana	NA										<300		no			yes_final							Journal article
Oligocene niche shift, Miocene diversification – cold tolerance and accelerated speciation rates in the St. John’s Worts (Hypericum, Hypericaceae) - additional file	N<c3><bc>rk, Nicolai M and Uribe-Convers, Simon and Gehrke, Berit and Tank, David C and Blattner, Frank R	2015			phylogeny, distribution	phylogeny, distribution			yes	NA	NA															yes_final							Journal article
Origin and propagation of Chromolaena odorata (L.) king and robinson (Asteraceae) between Mabele and Meiganga in the North of Cameroon	Didier, Dibong Siegfried and Zenabou, Ndiang and Marie, Ondoua Joseph and Paul, Bilong	2011			habitat	habitat			yes	Cameroun	shrubby savannah															yes_final							Journal article
Pattern of nectariferous plant diversity of African honeybee (Apis mellifera adansonii L.) in Awka and Agulu Environs, Southeast Nigeria	Akunne, CE and Akpan, AU and Ononye, BU	2016	Mutualism (potential) - Flower visitation (potential pollination)	Economic potential (e.g. honey prodution)	nectariferous, melliferous, bees	nectariferous, melliferous, bees, restoration			yes	Nigeria	NA			NA	NA			NA	NA	NA	NA	NA	yes			yes_final							Journal article
Patterns of woody plant species richness, diversity and structure along a disturbance gradient in the Atiwa range Forest Reserve, Eastern Region, Ghana	Kpontsu, Elizabeth Afua	2011			habitat, abundance	habitat, abundance			yes	Ghana	non disturbed forest															yes_final							Master thesis
Perspectives de mise en place de la Régénération Naturelle Assistée pour l'amélioration de jachères apicoles, en périphérie de la Réserve de Biosphère de Luki (RDC)	Dejace, Dorian	2019			melliferous, phenology	melliferous, phenology			yes	RDC	NA															yes_final							Master thesis
Phylogeny of the Ammobatini and revision of the Afrotropical genera (Hymenoptera: Apidae: Nomadinae)	Eardley, CONNAL D and Brothers, DENIS J	1997	Undefined		insect host	insect host			yes	NA																yes_final							Journal article
Phylogeny of the clusioid clade (Malpighiales): evidence from the plastid and mitochondrial genomes	Ruhfel, Brad R and Bittrich, Volker and Bove, Claudia P and Gustafsson, Mats HG and Philbrick, C Thomas and Rutishauser, Rolf and Xi, Zhenxiang and Davis, Charles C	2011			phylogeny, distribution	phylogeny, distribution			yes	NA																yes_final							Journal article
Plant recovery on the 1922 and 1959 lava flows on Mount Cameroon, Cameroon	Ndam, Nouhou and Healey, John and Cheek, Martin and Fraser, Penny	2001			pioneer, habitat	pioneer, habitat			yes	Cameroun	early successional forest				30303	12449					40-200					yes_final							Journal article
Pollen-rain-vegetation relationships along a forest-savanna transect in southeastern Cameroon	Vincens, A and Dubois, M.A and Guillet, B and Achoundong, G and Buchet, G and Kamgang Kabeyene Beyala, V and de Namur, C and Riera, B	2000			forest succession	forest succession			yes	Cameroun	NA							1600	23.8		640					yes_final							Journal article
Population structure and regeneration status of woody species in a remnant tropical forest: A case study of South Nandi forest, Kenya	Maua, James Odhiambo and MugatsiaTsingalia, Harrison and Cheboiwo, Joshua and Odee, David	2020			habitat	habitat			yes	Kenya	Guineoe Congolian moist rainforest				1600	1900			17-20		1700-2000					yes_final				well drained, extremely deep dark to reddish brown with friable clay and thick humic top layer			Journal article
Possible control of Senna spectabilis (Caesalpiniaceae), an invasive tree in Mahale mountains National Park, Tanzania	Wakibara, James V and Mnaya, Bakari J	2002		Heliophilous pioneer trait and rapid growth	pioneer, restoration	pioneer, restoration			yes	Tanzania	NA	1 (nov-may)	1 (june-oct)		1500	2300										yes_final							Journal article
Post fire regeneration of indigenous plant species in the Pugu Forest Reserve, Tanzania	Mligo, C	2019			habitat, pioneer	habitat, pioneer			yes	Tanzania	burned forest	2 (mar-jun, oct-dec)						1160								yes_final				thick-mantled Arenosols			Journal article
Potential Natural Vegetation of Eastern Africa (Ethiopia, Kenya, Malawi, Rwanda, Tanzania, Uganda and Zambia) Volume 9. Atlas and Tree Species Composition for Rwanda	Kindt, R and Van Breugel, P and Lilles<c3><b8>, JPB and Minani, V and Ruffo, CK and Gapusi, J and Jamnadass, R and Graudal, L	2014			habitat	habitat			yes	Tanzania, Kenya, Rwanda, Malawi, Ouganda, Zambia	Afromontane rain forest, Lake Victoria transitional rain forest															yes_final							Book
Predictive mapping of tree species assemblages in an African montane rainforest	Babaasa, Dennis and Finn, John T and Schweik, Charles M and Fuller, Todd K and Sheil, Douglas	2023			habitat, pioneer	habitat, pioneer			yes	Uganda	montane forest										1,416 – 2,467					yes_final							Journal article
Promiscuous pollinators—Evidence from an Afromontane sunbird–plant pollen transport network.	Nsor, Charles A and Godsoe, William and Chapman, Hazel M	2019	Mutualism (potential) - Flower visitation (potential pollination)		pollination, sunbird	pollination, sunbird			yes	Nigeria																yes_final							Journal article
Qualite et distribution des savanes montagnardes du Nimba	Senterre, Bruno and Paradis, Anne-H<c3><a9>l<c3><a8>ne and Bidault, Ehoarn and St<c3><a9>vart, Tariq and Lowry II, Porter P	2022			habitat	habitat			yes	Guinea	Savanes progressives arbustives montagnardes															yes_final							Project report
Quaternary forest associations in lowland tropical West Africa	Miller, Charlotte S. and Gosling, William D.	2014			pioneer	pioneer			yes		Guinean montane forest (Tropical and Subtropical - Moist Broadleaf Forests)										>800					yes_final							Journal article
Rainforest change analysis in Eastern Africa: a new multisourced, semi-quantitative approach to investigating more than 100 years of forest cover disturbance	Mitchell, Nicholas	2011			habitat	habitat			yes	Uganda	secondary forest															yes_final							Master thesis
Ranging behavior of Mahale chimpanzees: a 16 year study	Nakamura, Michio and Corp, Nadia and Fujimoto, Mariko and Fujita, Shiho and Hanamura, Shunkichi and Hayaki, Hitoshige and Hosaka, Kazuhiko and Huffman, Michael A. and Inaba, Agumi and Inoue, Eiji and Itoh, Noriko and Kutsukake, Nobuyuki and Kiyono-Fuse, Mieko and Kooriyama, Takanori and Marchant, Linda F. and Matsumoto-Oda, Akiko and Matsusaka, Takahisa and McGrew, William C. and Mitani, John C. …	2013	Predation or mutualism (Frugivory)		herbivory	herbivory			yes	Tanzania														Pan troglodytes	fruits	yes_final							Journal article
Rate of forest recovery after fire exclusion on anthropogenic savannas in the Democratic Republic of Congo	Deklerck, Victor and De Mil, Tom and Ilondea, BA and Nsenga, Laurent and De Caluw<c3><a9>, C and Van den Bulcke, Jan and Van Acker, Joris and Beeckman, H and Hubau, Wannes	2019			habitat, density	habitat, density			yes	RDC	savannah-forest transition							1180	24.6							yes_final							Journal article
Reconnaissance Survey of the Wildlife Sanctuary of Stubb's Creek Forest Reserve, Akwa Ibom State, Nigeria	Popoola, L and Jimoh, SO and Alarape, AA	2004			habitat	habitat			yes	Nigeria	oil palm bush															yes_final							Report
Reconquête forestière sur le plateau akposso (Togo): stratégies paysannes, caractéristiques botaniques et écologiques	Guelly, Kudzo	1994			habitat, forest succession, growth, phenology	habitat, forest succession, growth, phenology			yes	Togo	jachere de savanne															yes_final							Journal article
Recovery of Kakamega tropical rainforest from anthropogenic disturbances	Mutiso, Festus M and Hitimana, J and Kiyiapi, JL and Sang, FK and Eboh, E	2013			habitat, density, pioneer	habitat, density, pioneer			yes	Kenya	Guineo-congolean tropical rain forest (disturbed and undisturbed)							2000	28-32		1580					yes_final							Journal article
Recovery of plant species richness and composition after slash-and-burn agriculture in a tropical rainforest in Madagascar	Klanderud, Kari and Mbolatiana, Hery Zo Hasiniaina and Vololomboahangy, Manjato Nadiah and Radimbison, Marie Agnes and Roger, Edmond and Totland, <c3><98>rjan and Rajeriarison, Charlotte	2010		Heliophilous pioneer trait and rapid growth	restoration	restoration			yes	Madagascar																yes_final							Journal article
Red, far red wavelength, the ratio red to far red, temperature and vegetation at a secondary forest regrowth and under the crowns of three plantation tree species at Umudike, Nigeria	Dike, MC	2009			habitat, photosynthesis	habitat, photosynthesis			yes	Nigeria	abandonned farmland and under canopy of plantation forest of Treculia africana															yes_final							Journal article
Reduced abundance of late-successional trees but not of seedlings in heavily compared with lightly logged sites of three East African tropical forests	Kirika, Jasper Mbae and B<c3><b6>hning-Gaese, Katrin and Dumbo, Bonny and Farwig, Nina	2010			forest succession	forest succession			yes	Uganda, Kenya	disturbed Congo–Guinean rain-forest medium altitude semi decidous (logged)	2 (apr-may, aug-oct)			1410	1910					1100-1650					yes_final							Journal article
Regeneration potentials of the tree species at bc 32/4 in Sakponba Forest Reserve, Edo State, Nigeria	Ada, Osamionayi R and Ureigho, Ufuoma N and Okunomo, Kehinde	2020			forest succession	forest succession			yes	Nigeria	NA															yes_final							Journal article
Relations aire-espèces dans les jachères du périmètre de la réserve naturelle de Kigwena (Burundi)	Bangirinama, Fr<c3><a9>d<c3><a9>ric and Bigendako, Marie Jos<c3><a9> and Lejoly, Jean	2009			habitat	habitat			yes	Burundi	fallow							1172	23.86		820					yes_final				sol noir profond, humique, fertile et à bonne rétention d’eau.			Journal article
Relations cultures vivrières - cultures de rente et dynamiques agraires au Burundi : une étude de cas à partir de trois régions agro-écologiques (Buyenzi, Imbo-sud et Mugamba-sud)	Prudence, NDAYISHIMIYE	NA			habitat	habitat			yes	Burundi	savane à Brachystegia				1000	1200			24							yes_final							PhD thesis
Rice, weeds and shifting cultivation in a tropical rain forest	De Rouw, Anneke	1991			pioneer, forest succession	pioneer, forest succession			yes	Cote d'Ivoire	rice field and abandonned rice field							1800-2100	26							yes_final							Book
Rôle de la banque de graines du sol dans la régénération des forêts denses humides d’Afrique centrale	Douh, Chauvelin	2018			seed bank, pioneer	seed bank, pioneer			yes	Congo	moist tropical forest (transitional forest between the semi-deciduous and evergreen)							1670	24		430-530					yes_final				sandy soils			PhD thesis
Root Distribution in Relation to Vegetation and Soil Type in the Forests of the East Usambaras	Taylor, David	1989			habitat, pioneer, growth	habitat, pioneer, growth			yes	Tanzania	submontane forest, secondary forest															yes_final				bare humus soil			Book
Sanaga gas project biodiversity assessment	Ekstrom, Jonathan	2008			habitat	habitat			yes	Cameroun	NA							2950	25							yes_final							Report
Selection precoce des especes forestieres et potentiel mycorhizien arbusculaire en vue de la reforestation de la foret claire degradee du Haut-Katanga, en Republique Democratique du Congo.	Kaumbu, Jean Marc Kyalamakasa	2021	Mutualism (Mycorrhizal association)		pioneer, restoration, mycorrhize	pioneer, restoration, mycorrhize			yes	RDC	NA							1200	17-26		1192-1286					yes_final				ferralsols, acides avec des teneurs élevées en aluminium et fer (Bauman et al., 2016). Ils sont également pauvres en éléments nutritifs tels que l’azote, le phosphore			PhD thesis
Secondary succession and soil fertility restoration in South-Western Nigeria: I. succession	Aweto, Albert O	1981			forest succession	forest succession			yes	Nigeria	fallow 10y															yes_final							Journal article
Secondary successions after shifting cultivation in a dense tropical forest of southern Cameroon (Central Africa)	TchienguÃƒÂ©, BarthÃƒÂ©lemy	2013			forest succession	forest succession			yes	Cameroun	forest fallows															yes_final							PhD thesis
Secondary vegetation and the transition to savanna near Ibadan, Nigeria	Clayton, WD	1958			habitat, forest succession	habitat, forest succession			yes	Nigeria	fallow															yes_final							Journal article
Seed dispersal by tantalus monkeys (Chlorocebus tantalus tantalus) in a Nigerian montane forest	Agmen, Fiona L and Chapman, Hazel M and Bawuro, Musa	2010	Predation or mutualism (Frugivory)		herbivory, germination	herbivory, germination			yes	Nigeria														Chlorocebus tantalus tantalus	fruits	yes_final							Journal article
Seeds in a rainforest soil and their relation to shifting cultivation in the Ivory Coast	De Rouw, Anneke and van OERS, CATHARINA	1988			pioneer, habitat	pioneer, habitat			yes	Cote d'Ivoire	secondary forest							1900								yes_final				acid, thoroughly leached and chemically poor, with a high clay content			Journal article
Sociocognitive development in chimpanzees: a synthesis of laboratory work and fieldwork	Matsuzawa, Tetsuro	2006			forest succession	forest succession			yes	Guinea	NA															yes_final							Book chapter
Soil seed bank dynamics and regeneration in three different physiognomies in Shasha forest reserve in southwestern Nigeria	Akinyemi, DS and Oke, SO	2013			seed bank, habitat	seed bank, habitat			yes	Nigeria	cultivated land, natural regrowth secondary forest, Gmelina arborea plantation							1421			122					yes_final							Journal article
Soil Seed Bank Dynamics of a Riparian Forest and its Adjacent Upland Vegetation	OLALOYE, Omowumi Omotoyosi and OKE, Samson Olajide	2016			seed bank, habitat	seed bank, habitat			yes	Nigeria	riparian forest and the adjacent upland vegetation							1400								yes_final							Journal article
SOIL SEED BANK, FLORA SPECTRUM AND CARBON STOCK IN A COPPICED TEAK (Tectona grandis LINN. F.) PLANTATION IN GAMBARI FOREST RESERVE, IBADAN, NIGERIA	DJIBO, Bassirou IBRAHIMA	2021			seed bank, habitat	seed bank, habitat			yes	Nigeria	teak plantation															yes_final							PhD thesis
Soil water- and overland flow dynamics in a tropical catchment subject to long-term slash-and-burn agriculture	Zwartendijk, B.W. and van Meerveld, H.J. and Ghimire, C.P. and Ravelona, M. and Lahitiana, J. and Bruijnzeel, L.A.	2020			forest succession	forest succession			yes	Madagascar	fallow <15y				<100/month			1625	15-22		940-1000	yes				yes_final							Journal article
Some Honeybee Plants of Bas-Congo Province, Democratic Republic of Congo	Latham, Paul and Konda ku Mbuta, A	2011	Mutualism (potential) - Flower visitation (potential pollination)		melliferous, general description	melliferous, general description			yes	RDC																yes_final							Report
Spatial and temporal distribution of call activities of two Gephyromantis species (Mantellidae) along forest-farmbush habitat in Ranomafana, Madagascar	Ramamonjisoa, Noelikanto and Rakotonoely, Harisoa and Thomas, Hannah	2013			habitat, frequency	habitat, frequency			yes	Madagascar	secondary forest															yes_final							Journal article
Spatial and temporal fluctuations in bird communities along a forest-farmland gradient in western Kenya	Mulwa, Ronald K	2012			habitat	habitat			yes	Kenya	secondary forests and farmland							2000	10.6-27.7		1520-1680					yes_final							Journal article
Spatial variations in Eulemur fulvus rufus and Lepilemur mustelinus densities in Madagascar	Lehman, Shawn M	2006			pioneer	pioneer			yes	Madagascar	NA															yes_final							Journal article
Spatio-ecological Assessment of Urban Plants in the Government Reserved Areas (GRAs) in Some Selected Capital Cities in South-south Region of Nigeria	Ita-Nya, EP and Obafemi, AA and Ndukwu, BC	2019			habitat	habitat			yes	Nigeria	NA															yes_final							Journal article
Spatio-temporal invasion dynamics of maesopsis eminii in Amani nature forest reserve, Tanzania	Mwendwa, Beatus A and Kaaya, Omega E and Kilawe, Charles J and Treydte, Anna C	2020			habitat	habitat			yes	Tanzania	NA			NA	NA			600-3000	15-23	NA	190-1130	yes				yes_final							Journal article
Species Composition	Delang, Claudio O. and Li, Wing Man	2013			forest succession	forest succession			yes		fallows															yes_final							Book chapter
Species composition and stand structure of secondary and plantation forests in a Kenyan rainforest	Otuoma, John and George Ouma, George and Okeyo, David and Anyango, Beatrice	2014			forest succession	forest succession			yes	Kenya	ten year-old young secondary forest from mid-elevation tropical rainforest – an eastern relic of the African equatorial rainforest				1500	2000			25		1600					yes_final							Journal article
Species diversity of Amphibia, Reptilia and Lipotyphla (Mammalia) at Ambolokopatrika, a rainforest between the Anjanaharibe-Sud and Marojejy massifs, NE Madagascar	Andreone, Franco and Randrianirina, Jasmin E. and Jenkins, Paula D. and Aprea, Gennaro	2000			habitat	habitat			yes	Madagascar	savoka															yes_final							Journal article
Strategies for empowering the local people to participate in forest restoration	Galabuzi, Charles and Eilu, Gerald and Mulugo, Lucy and Kakudidi, Esezah and Tabuti, John Robert Stephen and Sibelet, Nicole	2014		Economic potential (e.g. honey prodution)	restoration	restoration			yes	Uganda																yes_final							Journal article
Structure des peuplements ligneux des formations végétales d’un paysage protégé en zone périurbaine de la ville de Lubumbashi (RD Congo)	SIKUZANI, Yannick USENI and MUTEYA, H<c3><a9>ritier KHOJI and LANGUNU, Serge and ALIPADE, J<c3><a9>r<c3><b4>me EBUY and KANKUMBI, Fran<c3><a7>ois MUNYEMBA	2020			habitat	habitat			yes	RDC	woody savannah										1200-1300					yes_final							Journal article
Structure spatiale et dispersion des communautés d'arbres en forêt tropicale humide du Gabon: rôle des facteurs édaphiques et du gradient de chablis	Obame Engone, Jean-Paul	2015			habitat	habitat			yes	Gabon	forest gap		2					1700	23.9 (21.6-25.3)	85	520					yes_final				Ferrasols xanthiques			PhD thesis
Structure, composition and diversity of restored forest ecosystems on mine-spoils in South-Western Ghana	Nero, Bertrand Festus	2021			habitat	habitat			yes	Ghana	secondary forest (Following mining)							1874	23-35							yes_final				Haplic Alisols			Journal article
Succession floristique de forêts secondaires humides du sud-est de Madagascar Floristic succession in secondary rain forests of South-eastern Madagascar	RANDRIANARISON, A and RAZANAKA, S and RAKOTOARIMANANA, V and BUTTLER, A and CARRI<c3><88>RE, SM and HERV<c3><89>, D	2015			forest succession	forest succession			yes	Madagascar	NA															yes_final							Report
Successional dynamics of tree species during forest recovery in the southeast of Cote d'Ivoire	VROH, Bi Tra Aim<c3><a9> and Yao, Constant Yves Adou	2018			forest succession	forest succession			yes	Cote d'Ivoire	fallows (0-10y)							1500-2000								yes_final							Journal article
Sunbird pollination and the fate of strong contributors to a mutualistic network in a West African Montane Forest	Nsor, Charles Ayuk	2014	Mutualism (potential) - Flower visitation (potential pollination)		pollination, sunbird	pollination, sunbird			yes	Nigeria																yes_final							PhD thesis
Survival and growth of seedlings of 19 native tree and shrub species planted in degraded forest as part of a forest restoration project in Madagascar's highlands	Birkinshaw, Chris and Andrianjafy, Mamisoa and Rasolofonirina, Jean-Jacques	2009		High survival rate of seedling	restoration, frugivory, pioneer	restoration, frugivory, pioneer			yes	Madagascar	humid evergreen secondary forest fragment	1 (nov-apr)	1 (may-oct)					1850	13.5-27		1475					yes_final							Journal article
Systematics and biogeography of the clusioid clade (Malpighiales)	Ruhfel, Brad R	2011			phylogeny, distribution	phylogeny, distribution			yes		NA															yes_final							Book
Systematics of Cheilolejeunea (Spruce) Schiffn.(Lejeuneaceae) in continental Africa and its ecological significance in conservation of Kakamega and Budongo rainforests	Malombe, Itambo	2009	Commensalism		briophyte host, epiphyte	briophyte host, epiphyte			yes	Kenya, Uganda																yes_final							PhD thesis
Systematics, biogeography, and species delimitation of the malagasy Psorospermum (Hypericaceae)	Ranarivelo, Heritiana S	2017			phylogeny, distribution	phylogeny, distribution			yes	Madagascar	NA															yes_final							Journal article
Taxonomy and phylogeny of hyaline-spored coelomycetes	Li, Wen-Jing and McKenzie, Eric H. C. and Liu, Jian-Kui (Jack) and Bhat, D. Jayarama and Dai, Dong-Qin and Camporesi, Erio and Tian, Qing and Maharachchikumbura, Sajeewa S. N. and Luo, Zong-Long and Shang, Qiu-Ju and Zhang, Jin-Feng and Tangthirasunun, Narumon and Karunarathna, Samantha C. and Xu, Jian-Chu and Hyde, Kevin D.	2020	Predation (parasitism)		host for fungus	host for fungus			yes	NA																yes_final				leaf fungus			Journal article
The afromontane region	White, Frank	1978			pioneer	pioneer			yes	tropical Africa	lowland forest															yes_final							Book chapter
The antiquity of Madagascar's grasslands and the rise of C4 grassy biomes	Bond, William J and Silander Jr, John A and Ranaivonasy, Jeannin and Ratsirarson, Joelisoa	2008			pioneer, forest succession	pioneer, forest succession			yes	Madagascar	grassland															yes_final							Journal article
The avifauna and forest vegetation of Mt. Mabu, northern Mozambique, with notes on mammals	Dowsett-Lemaire, Fran<c3><a7>oise and Dowsett, Robert J	2009			habitat	habitat			yes	Mozambique	Lowland rain (riparian) forest (edge)										400-500					yes_final							Report
THE CHIMANIMANI MOUNTAINS: AN UPDATED CHECKLIST	WURSTEN, BART and TIMBERLAKE, JONATHAN and DARBYSHIRE, IAIN	2017			habitat	habitat			yes	Zimbabwe	NA										>1200					yes_final							Journal article
THE EFFECT OF LAND USE CHA PATTE	OGUNDELE, FO	2022			habitat	habitat			yes	Nigeria	fallow (5y)				1524	2699			27	80						yes_final				Alfisols			Journal article
The effect of land use on the community structure distribution and abundance of ground beetles (Insecta: Coleoptera) in a guinea savanna in Nigeria	Ewuim, Sylvanus Chima	2008			habitat	habitat			yes	Nigeria	secondary regrowth forest fringe															yes_final							Journal article
The effects of climate and edaphic factors on plant colonisation of lava flows on Mount Cameroon	Fonge, BA and Focho, DA and Egbe, EA and Tening, AS and Fongod, AN and Neba, GA and Mvondo, Ze A	2011			habitat	habitat			yes	Cameroun	secondary forest (on lava flow)				3303	12449		8392								yes_final							Journal article
The effects of herbivory, land-use and climate change on seedling establishment in southern Africa	Fijamo, Valdemar Rodrigu<c3><aa>s and Ribeiro, Natasha and Massad, Tara Joy	2023			habitat	habitat			yes	Mozambique	disturbed forest for agriculture							2007	22.9		940					yes_final							Journal article
The flora and fauna of Lolui Island, Lake Victoria: A study of vegetation, men and monkeys	Jackson, G and Gartlan, JS	1965	Predation or mutualism (Frugivory)		forest succession, herbivory	forest succession, herbivory			yes	Uganda	thicket margin, grassland				1525	1650			16-27.5					monkeys	fruits	yes_final							Journal article
The floristic diversity and the carbon stock evaluationin some periphery sites of the douala-edea wildlife reserve in cameroon	ANGONI, Hyacinthe and Melingui, Jean Baptiste NGODO and Essimi, Achile ZINGA	2018			habitat	habitat			yes	Cameroun	NA							3000-4000								yes_final							Journal article
The forest vegetation of Mt Mulanje (Malawi): a floristic and chorological study along an altitudinal gradient (650-1950 m)	Dowsett-Lemaire, F	1988			habitat	habitat			yes	Malawi	lowland and mid altitude transition forest										650-950, 900-1350					yes_final							Journal article
The growing of Mvule in Uganda	Brasnett, NV	1944		Grass suppression	restoration	restoration			yes	Uganda																yes_final							Journal article
The Guineo-Congolian Rain Forest Biome	Huntley, Brian John	2023			pioneer	pioneer			yes	Angola	disturbed forest															yes_final							Journal article
The impact of introduced animals and plants on São Tomé seed-dispersal network	Mendes, Filipa dos Santos	2017			frugivory	frugivory			yes	Sao Tome																yes_final							Master thesis
The integration of browse plants within pastoral and agropastoral systems in Africa	Boudet, GC and Toutain, B	1980			pioneer	pioneer			yes		NA															yes_final							Book
The one hundred tree species prioritized for planting in the tropics and subtropics as indicated by database mining	Kindt, Roeland and Dawson, Ian K and Lilles<c3><b8>, Jens-Peter B and Muchugi, Alice and Pedercini, Fabio and Roshetko, J and van Noordwijk, Meine and Graudal, Lars and Jamnadass, Ramni	2021		No specific reason	restoration	restoration			yes	NA																yes_final							Report
The potential conservation value of anthropogenically modified habitat for the Endangered moor macaque Macaca maura in Sulawesi, Indonesia	Riley, Erin P and Albani, Alessandro and Zak, Alison A and Germani, Lavinia and Rothman, Jessica M and Carosi, Monica and Ngakan, Putu Oka	2023		Beneficial for widlife; Economic potential (e.g. honey production)	restoration, pioneer, use outside native range	restoration, pioneer, use outside native range			yes	Indonesia	NA															yes_final							Journal article
THE PROTECTION OF SAVANNAS AND ITS EFFECTS ON THE VOLUME OF WOOD, BIOMASS AND CARBON SEQUESTRATION	Mbangilwa, MM and Malotie, JM and Mbayu, MF and Kasoro, RF and Jiang, LC	2020			habitat	habitat			yes	RDC	savannah															yes_final							Journal article
The role of ants in seed dispersal and regeneration in a degraded West African montane forest-grassland landscape, Ngel Nyaki Forest Reserve, Nigeria	Agaldo, Jennifer Arubemi	2017	Mutualism (Myrmecochory)		seed dispersal, insect	seed dispersal, insect			yes	Nigeria																yes_final							PhD thesis
The Role Of Fruit Bat Eidolon Helvum And Avian Frugivores In Guava Seed Dispersal And Tree Establishment In Agricultural Landscapes In Vihiga, Western Kenya	Makau, Rogers K	2016			habitat	habitat			yes	Kenya	NA															yes_final							Master thesis
The role of negative density dependence in shaping species distributions in Tropical Afromontane Forest	Abiem, Iveren	2020			habitat, growth, edge effect	habitat, growth, edge effect			yes	Nigeria	Afromontane forest							1800	19		1400-1600					yes_final				volcanic and has a high clay content and a pH ranging between 6 and 6.5			PhD thesis
The role of the tantalus monkey (Chlorocebus tantalus tantalus) in forest restoration via seed dispersal in a West African montane forest	Grassham, Abigail Michelle	2012	Predation or mutualism (Frugivory)		herbivory	herbivory			yes	Nigeria														Chlorocebus tantalus tantalus	fruits	yes_final							Master thesis
The soils and geography of the Boliland Region of Sierra Leone	Stobbs, AR and Bakshi, TS	1963			habitat	habitat			yes	Sierra Leone	forest and savannah															yes_final							Book
The Sudano-Zambezian Region	Werger, M. J. A. and Coetzee, B. J.	1978			habitat	habitat			yes	Sudan, Zambia	Brachystegia spicijormis woodland			undergrowth	1200	1800										yes_final				red, compact, ferralitic clay			Book chapter
The vegetation and soils of Chishinga Ranch, Luapula Province, Zambia	Astle, WL	1968			habitat	habitat			yes	Zambia	woodland															yes_final				3 flowering periods			Journal article
The vegetation of Mafia island, Tanzania	Greenway, PJ and Rodgers, WA and Wingfield, RJ and Mwasumbi, LB	1988			habitat	habitat			yes	Tanzania	wooded lake bank				1460			2000			0-60					yes_final							Journal article
The vegetation of the Imatong mountains, Sudan	Jackson, J Kenneth	1956			habitat, pioneer	habitat, pioneer			yes	Sudan	intermediate altitude forest, savannah woodland			canopy, edge							1200-1500					yes_final							Journal article
TIMBER PLANTING IN THE" TERMINALIA" WOODLAND OF NORTHERN UGANDA	Dawkins, HC	1949		Grass suppression	restoration	restoration			yes	Uganda																yes_final							Journal article
Timbers 2	Lemmens, RHMJ and Louppe, D and Oteng-Amoako, AA	2012		Nurse tree potential	restoration, nurse tree	restoration, nurse tree			yes																	yes_final							Book
To plant or protect: Evaluating forest recovery dynamics under natural and aided regeneration in western Kenya	Otuoma, John and Ongugo, Paul and Kemboi, Damaris and Mairura, Franklin and Akinyi, Fiona	2013		Heliophilous pioneer trait and rapid growth	restoration, growth, forest succession	restoration, growth, forest succession			yes	Kenya	NA															yes_final							Conference paper
Transpiration and stomatal conductance in a young secondary tropical montane forest: contrasts between native trees and invasive understorey shrubs	Ghimire, Chandra Prasad and Bruijnzeel, L Adrian and Lubczynski, Maciek W and Zwartendijk, Bob W and Odongo, Vincent Omondi and Ravelona, Maafaka and Van Meerveld, HJ	2018			habitat	habitat			yes	Madagascar	young secondary forest (6y)							1625	15-22	85-94	990					yes_final							Journal article
Tree condition and natural regeneration in disturbed sites of Bwindi Impenetrable Forest National Park, southwestern Uganda	Eilu, Gerald and Obua, Joseph	2005			habitat	habitat			yes	Uganda	undisturbed and disturbed forest															yes_final							Journal article
Tree diversity and alien encroachment in the native forest of Black River Gorges National Park, Mauritius	Ragen, Parmananda	2007		Competition with native species	invasive	restoration			yes	Mauritius																yes_final							Master thesis
Tree species composition, richness and diversity in the northern forest-savanna ecotone of Ghana	Attua, Emmanuel M and Pabi, Opoku	2013			habitat, abundance	habitat, abundance			yes	Ghana	NA															yes_final							Journal article
Tree structural and species diversities in Okwangwo forest, cross river state, Nigeria	Adeyemi, AA and Ibe, AE and Okedimma, FC	2015			habitat	habitat			yes	Nigeria	NA							4280								yes_final							Journal article
TREES SPECIES DIVERSITY AND SOIL PHYSIOCHEMICAL PROPERTIES IN UKPON FOREST RESERVE, CROSS RIVER STATE, NIGERIA	RIVER, CROSS	2023			habitat, abundance	habitat, abundance			yes	Nigeria	riverine forest															yes_final							Journal article
Typologie de la végétation rémanente en vue d’une restauration écologique. Cas du site d’Ankafobe – Tampoketsa d’Ankazobe - Hautes terres centrales de Madagascar	Hajamanalina, RAJEMISON Andraina and de Neupomusc<c3><a8>ne, Pr RAKOTOZANDRINY Jean and Gabrielle, Pr RAJOELISON Lalanirina and Chris, BIRKINSHAW and Lala, RAZAFY FARA	2010			pioneer, habitat	pioneer, habitat			yes	Madagascar	degraded forest															yes_final							Master thesis
Typologie des habitats en fonction du gradient altitudinal: Cas du Parc National de Marojejy	Tahinarivony, Jacquis A	2023			habitat	habitat			yes	Madagascar	secondary forest and shrub															yes_final							Book chapter
Un environnement en grande partie préservé : le milieu «naturel» centrafricain. In: Pratiques de gestion de l’environnement dans les pays tropicaux	Boulvert, Yves	1997			pioneer	pioneer			yes	Republic Centre Africaine	NA															yes_final							Journal article
Uncovering the complex relationship between plant diversity, soil properties, and mycorrhizal inoculum potential in threatened miombo woodlands	Kaumbu, Jean-Marc Kyalamakasa and Sene, Godar and Stefani, Franck and Khasa, Damase P	2023	Mutualism (Mycorrhizal association)		mycorrhize, restoration	mycorrhize, restoration			yes	RDC								1200	20	68	1192					yes_final							Journal article
Usages, perception et gestion des jacheres: comparaison entre une region seche et une region humide de l'Afrique de l'Ouest	Roussel, Bernard	1994			forest succession	forest succession			yes	Togo	jachere (0-6y)															yes_final							Journal article
USAID/West Africa Biodiversity and Climate Change (WA BiCC) program. (2020, July). Building resilience to climate change in the Fresco coastal landscape: Analysis and recommendations for management of Port Gauthier and Okromoudou classified forests,	Amin, Ariane and Kouakou, Gilbert	2020			habitat, pioneer	habitat, pioneer			yes		NA															yes_final							Report
Use of gallery and non-gallery forest by ungulates inhabiting the Loma Mountains Non-hunting Forest Reserve, Sierra Leone, West Africa	Kortenhoven, Aaron Peter	2009			pioneer	pioneer			yes	Sierra Leone	NA															yes_final							Report
Using utilitarian plants for lemur conservation	Konersmann, Cathlin and Noromiarilanto, Fanambinantsoa and Ratovonamana, Yedidya R and Brinkmann, Katja and Jensen, Kai and Kobbe, Susanne and Koehl, Michael and Kuebler, Daniel and Lahann, Petra and Steffens, Kim JE	2021			herbivory	herbivory			yes	Madagascar														Lemurs	NA	yes_final							Journal article
UTILISATION DE L’OUTIL ISOTOPIQUE 13C POUR EVALUER LA DYNAMIQUE DE CARBONE DU SOL SUIVANT LES MODES D’USAGE DES TERRES DU CORRIDOR ANKENIHENY-ZAHAMENA (Est-Madagascar)	Onjaniaina, ANDRIANOME	2017			habitat, forest succession	habitat, forest succession			yes	Madagascar	shrub fallow															yes_final							Master thesis
Vascular plant diversity and community structure of Nandi forests, western Kenya	Girma, Adane and Fischer, Eberhard and Dumbo, Bonny	2015			habitat	habitat			yes	Kenya	NA				1600	1900			17-20		1700-2145					yes_final				humic Nitosols			Journal article
Vegetation and soil status on an 80 year old lava flow of Mt. Cameroon, West Africa	Fonge, BA and Yinda, GS and Focho, DA and Fongod, AGN and Bussmann, RW	2005			pioneer	pioneer			yes	Cameroun	secondary forest on lava flow															yes_final							Journal article
Vegetation assessment of Takamanda forest reserve, Cameroon	Sunderland, Terry CH and Comiskey, James A and Besong, Simon and Mboh, Hyacinth and Fonwebon, John and Dione, Mercy Abwe	2003			habitat, density, basal area	habitat, density, basal area			yes	Cameroun	secondary forest (post cultivation), montane forest										800-1500					yes_final							Journal article
Vegetation change analysis and ecological recovery of the Copperbelt Miombo woodland of Zambia	Syampungani, Stephen	2009			habitat, forest succession	habitat, forest succession			yes	Zambia	fallow 2-3y															yes_final							PhD thesis
Végétation des jachères et succession post-culturale en Afrique tropicale	Foumier, Anne and Floret, Christian and Gnahoua, Guy-Modeste	2001			forest succession	forest succession			yes	tropical Africa	jachere de foret et savanne (up to 18y)				1400	1900										yes_final							Journal article
VEGETATION DYNAMICS IN FALLOW GENEALOGICAL CYCLES IN PART OF THE CROSS RIVER RAINFOREST, SOUTH-SOUTHERN NIGERIA	Offiong, RA and Iwara, AI and Ekpe, IA	2016			forest succession	forest succession			yes	Nigeria	fallow (3-5th generation)															yes_final							Journal article
Végétation forestière des savanes centrafricaines	Boulvert, Yves	1980			habitat, pioneer	habitat, pioneer			yes	Republic Centre Africaine	foret dense semi-humide, savanne anthropique															yes_final							Journal article
Vegetation of Pande and Kiono coastal forests, Tanzania	Mwasumbi, LB and Burgess, ND and Clarke, GP	1994			habitat	habitat			yes	Tanzania	coastal forest								25.5-26		250					yes_final							Journal article
Vegetation patterns and environmental gradients in Benin: implications for biogeography and conservation	Adomou, Aristide Cossi	2005			habitat	habitat			yes	Benin	Swamp and semideciduous forest							1100-1300								yes_final				hydromorphic soil			PhD thesis
Vegetation response to the "African Humid Period" termination in Central Cameroon (7° N) – new pollen insight from Lake Mbalang	Vincens, Annie and Buchet, Guillaume and Servant, Michel	2010			pioneer, pollen, habitat	pioneer, pollen, habitat			yes	Cameroun	NA															yes_final							Journal article
Vegetation Survey of Mount Gorongosa	M<c3><bc>ller, Tom and Mapaura, Anthony and Wursten, Bart and Chapano, Christopher and Ballings, Petra and Wild, Robin	2012			habitat	habitat			yes	Mozambique	inselberg, in woodland and grasslands regenerating										700-1863					yes_final							Report
Vegetative propagation at low cost: A method to restore degraded lands	Bellefontaine, Ronald and Malagnoux, Michel	2008		Low-cost restoration potential	restoration	restoration			yes	NA																yes_final							Conference paper
Weeds of rainforests and associated ecosystems	Grice, AC and Setter, MJ	2002			invasive	invasive			yes	Australia																yes_final							Workshop proceedings
Woody plants recovery in abandoned farms of different ages in the Mount Cameroon region	Ndam, Nouhou and Healey, John	2001			pioneer, forest succession	pioneer, forest succession			yes	Cameroun	fallows (<10y)							3000	25		800					yes_final							Journal article
COMMUNAUTES MYCORHIZIENNES : STRUCTURE ET FONCTIONNEMENT SELON L’ETAT DE DEGRADATION DES ECOSYSTEMES FORESTIERS DU HAUT PLATEAU ET DE LA RÉGION EST DE MADAGASCAR	Ramanankierana, H and Randriambanona, H and Baohanta, R and Sanon, A and Andrianandrasana, DM and Rajaonarimamy, E and Duponnois, Robin	2013	Mutualism (Mycorrhizal association)		mycorrhize, restoration	mycorrhize, restoration			yes	Madagascar																yes_final							Report
ETUDE PRELIMINAIRE DES EFFETS DE LISIERE SUR QUATRE ESPECES DE RONGEURS DANS LA RESERVE FORESTIERE DE MASAKO (Kisangani, R.D. Congo)	Kisangani, RD	2009			habitat	habitat			yes	RDC	lisiere															yes_final							Journal article
Ferns and fern allies: bio indicators of changes occurred in the structure of the mountain forests within the Kahuzi-Biega National Park in eastern DR Congo	Mangambu Mokoso, Jean de Dieu and Muhashy, Fran<c3><a7>ois and Robbrecht, Elmar and Janssen, Thomas and Ntahobavuka Habimana, Honorine and van Diggelen, Ruurd	2015	Commensalism		epiphyte, habitat	epiphyte, habitat			yes	RDC																yes_final							Journal article
Tree recruitment from on-site versus off-site propagule sources during tropical forest succession	DUNCAN, R SCOT	2006			forest succession	forest succession			yes	Uganda	conifer plantation							1543								yes_final							Journal article
Carbon of Chaillu forests based on a phytosociological analysis in Republic of Congo, more than meets the eye?	Van Rooyen	2023		Carbon sequestration	restoration, carbon	restoration, carbon			yes	Republic of Congo	early successional forest							1800	22							yes_final							Journal article
Plantes-hôtes et bionomie de quelques Cerambycidae africains (Coleoptera )		1993	Undefined		insect host	insect host			yes	Republique centrafricaine														Phrosyme brevicornis	dead branch	yes_final							Journal article
Partitioning of understorey light and dry-season soil moisture gradients among seedlings of four rain-forest tree species in Madagascar	De Gouvenain	2007		Heliophilous pioneer trait and rapid growth	restoration	restoration			yes	Madagascar																yes_final							Journal article
Sur les cochenilles de la région de Taï (Côte d'Ivoire), recensées dans les cultures et en forêt dense, (Homoptera, Coccoidea)		1986	Undefined		insect host	insect host			yes	Cote d'Ivoire																yes_final							Journal article
Contribution à l'étude des aleurodes africains (4e note)		1967	Undefined		insect host	insect host			yes	NA																yes_final							Scientific note
Mauritius is putting Conservation at Risk	Florens	1998				restoration			yes	Mauritius																yes_final							Journal article
Seedlings, saplings and tree temperaments : potential for agroforestry in the African rain forest		1996			forest succession	forest succession			yes	Gabon																yes_final							Book chapter
Diversity and Phorophyte Preference of Vascular Epiphytic Flora on Avenues within the University of Port Harcourt, Nigeria		2021	Commensalism		epiphyte	epiphyte			yes	Nigeria																yes_final							Journal article
An overview of invasive woody plants in the tropics.		1998			invasive	invasive			yes	NA																yes_final							Report
Lasioglossum		2023	Undefined		insect host	insect host			yes	Tropical Africa																yes_final							web transcript
Plantes nourricières des Phasmes des Mascareignes : Maurice, Réunion, Rodrigues (Phasmatodea)		2007	Undefined		insect host	insect host			yes	Mascarene islands																yes_final							Journal article
Silk moths inventory in their natural tapia forest habitat (Madagascar): diversity, population dynamics and host plants		2013	Undefined; Predation (Folivory)		insect host	insect host			yes	Madagascar																yes_final							Journal article
Contribution a l'Étude Morphologique et Biologique des Stictococcinae [Hom. Coccoidea]		1971	Undefined		insect host	insect host			yes	Republic Centre Africaine																yes_final							Journal article
La fidélité à l'arbre hôte chez un acridien sédentaire Stenocrobylus festivus (Orthoptera, Acridoidea)		1996	Undefined		insect host	insect host			yes	Cote d'Ivoire																yes_final							Journal article
Description de neuf nouvelles especes afrotropicales de Popillia Servill~ 1825 (Coleoptera, Scarabaeoidea, Melolonthidae, Rutelinae, Anomalini)		2008	Undefined		insect host	insect host			yes	Cameroun																yes_final							Journal article
The behavioural ecology of host selection in <i>Anopheles implexus</i> (Theobald) (Diptera, Culicidae)		1976	Undefined		insect host	insect host			yes	Uganda																yes_final							Journal article
Plant–frugivore networks are less specialized and more robust at forest–farmland edges than in the interior of a tropical forest		2012			herbivory	herbivory			yes	Kenya															NA	yes_final							Journal article
Notes sur les espèces exotiques de phasmes à Madagascar (Insecta : Phasmatodea)		2012	Undefined		insect host	insect host			yes	Madagascar																yes_final							Journal article
Nouvelles espèces remarquables de Pachyhalictus Cockerell, avec un catalogue des espèces du genre (Hymenoptera : Halictidae)		2007	Undefined		insect host	insect host			yes	Gabon																yes_final							Journal article
Forests of Mount Kenya: First Phytosociological and Ecological Data	Bussmann, Rainer and Beck, Erwin	NA			NA	NA	NA	NA	yes	NA	NA	NA	NA	NA	NA	NA	NA	NA	NA	NA	NA	NA	NA	NA	Google Scholar.ris	Forests of Mount Kenya: First Phytosociological and Ecological Data	no mention	yes	Kenya				Journal article															no
Germination of important East African mountain forest trees	Bussmann, RW and Lange, S	2000			89	NA	NA	1026-1613	yes	NA	NA	NA	101-111	NA	2000///	NA	NA	Journal of East African Natural History	NA	NA	NA	NA	NA	NA	Google Scholar.ris	Germination of important East African mountain forest trees	germination	yes	Kenya	mountain forest			Journal article															no
