# Supplementary material for: A scoping review of tropical pioneer trees’ roles for restoration and conservation management: Harungana madagascariensis (Hypericaceae) a widespread African species as a model
Source: PeerJ. 2025 May 23;13:e19458. doi: 10.7717/peerj.19458 (PMC12105622; doi:10.7717/peerj.19458)
Supplement: Supplemental Information 3 [file peerj-13-19458-s003.xlsx]

## Sheet: occurrence
gbifID	accessRights	bibliographicCitation	language	license	modified	publisher	references	rightsHolder	type	institutionID	collectionID	datasetID	institutionCode	collectionCode	datasetName	ownerInstitutionCode	basisOfRecord	informationWithheld	dataGeneralizations	dynamicProperties	occurrenceID	catalogNumber	recordNumber	recordedBy	recordedByID	individualCount	organismQuantity	organismQuantityType	sex	lifeStage	reproductiveCondition	behavior	establishmentMeans	degreeOfEstablishment	pathway	georeferenceVerificationStatus	occurrenceStatus	preparations	disposition	associatedOccurrences	associatedReferences	associatedSequences	associatedTaxa	otherCatalogNumbers	occurrenceRemarks	organismID	organismName	organismScope	associatedOrganisms
912527560				CC_BY_4_0									K	Herbarium			PRESERVED_SPECIMEN				http://specimens.kew.org/herbarium/K000673485	K000673485	229	Darbyshire, I.													PRESENT								Sheet 1/5; Additional collector(s): Piggot, Peiris, Njume, Etuge, Ronsted; Associated carpological material
912320490				CC_BY_4_0									K	Herbarium			PRESERVED_SPECIMEN				http://specimens.kew.org/herbarium/K000381366	K000381366	3	Kwangue, A.													PRESENT								Sheet 1/3
912320431				CC_BY_4_0									K	Herbarium			PRESERVED_SPECIMEN				http://specimens.kew.org/herbarium/K000381347	K000381347	183	Ndam, N.													PRESENT								Sheet 1/3; Additional collector(s): Cheek M.
912290103				CC_BY_4_0									K	Herbarium			PRESERVED_SPECIMEN				http://specimens.kew.org/herbarium/K000337600	K000337600	906	Munyenyembe, P.													PRESENT								Sheet 1/4; Additional collector(s): Mbago F., Ndagalasi H., Lem P., Siraj, M
912216015				CC_BY_4_0	2004-05-25T09:15:45.260Z								K	Herbarium			PRESERVED_SPECIMEN				http://specimens.kew.org/herbarium/K000240001	K000240001	2687	Pkerlot, R.													PRESENT								Label in french
912216002				CC_BY_4_0	2004-05-25T09:50:12.307Z								K	Herbarium			PRESERVED_SPECIMEN				http://specimens.kew.org/herbarium/K000240003	K000240003	4282	Robyns.													PRESENT								Label not in English
912179629				CC_BY_4_0									K	Herbarium			PRESERVED_SPECIMEN				http://specimens.kew.org/herbarium/K000197846	K000197846	4700	Etuge, M.													PRESENT								Sheet 1/4; Additional collector(s): Christo, Raza, Freedy, Gosline, babla, Fonji
912151000				CC_BY_4_0									K	Herbarium			PRESERVED_SPECIMEN				http://specimens.kew.org/herbarium/K000105192	K000105192	216	Nemba, J.													PRESENT								Sheet 1/2; Additional collector(s): Thomas, D.W....
912150989				CC_BY_4_0									K	Herbarium			PRESERVED_SPECIMEN				http://specimens.kew.org/herbarium/K000105198	K000105198	1719	Maitland, T.D.													PRESENT
912150988				CC_BY_4_0									K	Herbarium			PRESERVED_SPECIMEN				http://specimens.kew.org/herbarium/K000105194	K000105194	15	Migeod, F.													PRESENT
912150987				CC_BY_4_0									K	Herbarium			PRESERVED_SPECIMEN				http://specimens.kew.org/herbarium/K000105196	K000105196	1183	Mann, G.													PRESENT
912150980				CC_BY_4_0									K	Herbarium			PRESERVED_SPECIMEN				http://specimens.kew.org/herbarium/K000105197	K000105197	245	Maitland, T.D.													PRESENT
912150971				CC_BY_4_0									K	Herbarium			PRESERVED_SPECIMEN				http://specimens.kew.org/herbarium/K000105199	K000105199	1242	Brunt, M.A.													PRESENT
912150968				CC_BY_4_0									K	Herbarium			PRESERVED_SPECIMEN				http://specimens.kew.org/herbarium/K000105191	K000105191	1229	Manning, S.D.													PRESENT								Sheet 1/2
912150958				CC_BY_4_0									K	Herbarium			PRESERVED_SPECIMEN				http://specimens.kew.org/herbarium/K000105193	K000105193	2315	Thomas, D.W.													PRESENT								Sheet 1/2
912150950				CC_BY_4_0									K	Herbarium			PRESERVED_SPECIMEN				http://specimens.kew.org/herbarium/K000105190	K000105190	TFM 379	Mbenkum, T.													PRESENT								Sheet 1/3
912150926				CC_BY_4_0									K	Herbarium			PRESERVED_SPECIMEN				http://specimens.kew.org/herbarium/K000105195	K000105195	15	Migeod, F.													PRESENT
912143001				CC_BY_4_0									K	Herbarium			PRESERVED_SPECIMEN				http://specimens.kew.org/herbarium/K000094652	K000094652	316	Etuge, M.													PRESENT								Sheet 1/2; Additional collector(s): Thomas, D.W....
912142997				CC_BY_4_0									K	Herbarium			PRESERVED_SPECIMEN				http://specimens.kew.org/herbarium/K000094651	K000094651	10312	Leeuwenberg, A.J.M.													PRESENT								Sheet 1/2
912142992				CC_BY_4_0									K	Herbarium			PRESERVED_SPECIMEN				http://specimens.kew.org/herbarium/K000094653	K000094653	241	Etuge, M.													PRESENT								Sheet 1/2; Additional collector(s): Thomas, D.W....
912095866				CC_BY_4_0									K	Herbarium			PRESERVED_SPECIMEN				http://specimens.kew.org/herbarium/K000026987	K000026987	2449	Etuge, M.													PRESENT								Sheet 1/8
912095864				CC_BY_4_0									K	Herbarium			PRESERVED_SPECIMEN				http://specimens.kew.org/herbarium/K000026990	K000026990	111	Gosline, G.													PRESENT								Sheet 1/2; Additional collector(s): Diangha, Musila
912095859				CC_BY_4_0									K	Herbarium			PRESERVED_SPECIMEN				http://specimens.kew.org/herbarium/K000026991	K000026991	550 A	Onana, J.-M.													PRESENT								Sheet 1/4; Additional collector(s): Gosline, Ghogue, Tadjouteu, Crouch-Smith, Murray, Jones, Wanbugu, Mbale
912095854				CC_BY_4_0									K	Herbarium			PRESERVED_SPECIMEN				http://specimens.kew.org/herbarium/K000026986	K000026986	15	Ghogue, J.-P.													PRESENT								Sheet 1/4; Additional collector(s): Mackinder, Barlow, Nwaga, Ndong Bass, Nana,
912095833				CC_BY_4_0									K	Herbarium			PRESERVED_SPECIMEN				http://specimens.kew.org/herbarium/K000026988	K000026988	9573	Cheek, M.													PRESENT								Common name: Ngelle; Language: Bakossi; Sheet 1/4; Additional collector(s): Sowah, Mujaju, Tchiengue, Chiatoh, Gosline, Pollard, Edmundo, Njume, Ebong Max
912095812				CC_BY_4_0									K	Herbarium			PRESERVED_SPECIMEN				http://specimens.kew.org/herbarium/K000026989	K000026989	325	Kenfack, D.													PRESENT								Sheet 1/3; Additional collector(s): Burger, Mwasumbe, Leonard, Metuge, Nede
912077618				CC_BY_4_0									K	Spirit Collection			PRESERVED_SPECIMEN				http://specimens.kew.org/herbarium/9052.000	9052	3683	Troupin, G.													PRESENT
912067844				CC_BY_4_0									K	Spirit Collection			PRESERVED_SPECIMEN				http://specimens.kew.org/herbarium/698.000	698	4778	Troupin, G.													PRESENT
912067823				CC_BY_4_0									K	Spirit Collection			PRESERVED_SPECIMEN				http://specimens.kew.org/herbarium/697.000	697	4299	Troupin, G.													PRESENT
912018099				CC_BY_4_0									K	Spirit Collection			PRESERVED_SPECIMEN				http://specimens.kew.org/herbarium/21842.000	21842	49	Bryce, Mr.													PRESENT
893316003				CC0_1_0									HNB	ABC			PRESERVED_SPECIMEN				870	185221		A. AkoÃ¨gninou, P. Agbani, H. YÃ©domonhan													PRESENT
883348359				CC0_1_0									Laboratoire des Sciences ForestiÃ¨res (LSF/UAC)	UAC			OCCURRENCE				4368	4368															PRESENT
813387378				CC_BY_NC_4_0					Collection				IICT	LISC			PRESERVED_SPECIMEN				urn:lsid:iict.pt:LISC:LISC043085	LISC043085	5384	Torre, A.R.							fruto						PRESENT	folha de herbÃ¡rio							Ãrvore de copa larga.
813387377				CC_BY_NC_4_0					Collection				IICT	LISC			PRESERVED_SPECIMEN				urn:lsid:iict.pt:LISC:LISC043084	LISC043084	5073	Torre, A.R.													PRESENT	folha de herbÃ¡rio							Pequena Ã¡rvore. Flores esbranquiÃ§adas.
813387376				CC_BY_NC_4_0					Collection				IICT	LISC			PRESERVED_SPECIMEN				urn:lsid:iict.pt:LISC:LISC043083	LISC043083	4810	Torre, A.R.													PRESENT	folha de herbÃ¡rio							Ãrvore de 7 m. Flores brancas.
813387375				CC_BY_NC_4_0					Collection				IICT	LISC			PRESERVED_SPECIMEN				urn:lsid:iict.pt:LISC:LISC043082	LISC043082	5481	Torre, A.R.							fruto						PRESENT	folha de herbÃ¡rio, cÃ¡psula							Ãrvore de copa larga.
813387374				CC_BY_NC_4_0					Collection				IICT	LISC			PRESERVED_SPECIMEN				urn:lsid:iict.pt:LISC:LISC043081	LISC043081	2655	MendonÃ§a, F.A.							fruto						PRESENT	folha de herbÃ¡rio							Ãrvore.
813387373				CC_BY_NC_4_0					Collection				IICT	LISC			PRESERVED_SPECIMEN				urn:lsid:iict.pt:LISC:LISC043080	LISC043080	2436	MendonÃ§a, F.A.													PRESENT	folha de herbÃ¡rio							Ãrvore de 10 m.
813387372				CC_BY_NC_4_0					Collection				IICT	LISC			PRESERVED_SPECIMEN				urn:lsid:iict.pt:LISC:LISC043079	LISC043079	528	Garcia, J.G.													PRESENT	folha de herbÃ¡rio							Ãrvore de 6 m. Flores branco-amareladas.
813387371				CC_BY_NC_4_0					Collection				IICT	LISC			PRESERVED_SPECIMEN				urn:lsid:iict.pt:LISC:LISC043078	LISC043078	3599	MendonÃ§a, F.A.													PRESENT	folha de herbÃ¡rio							Arbusto de 3 m.
813387370				CC_BY_NC_4_0					Collection				IICT	LISC			PRESERVED_SPECIMEN				urn:lsid:iict.pt:LISC:LISC043077	LISC043077	3599	MendonÃ§a, F.A.													PRESENT	folha de herbÃ¡rio							Arbusto de 3 m.
813387369				CC_BY_NC_4_0					Collection				IICT	LISC			PRESERVED_SPECIMEN				urn:lsid:iict.pt:LISC:LISC043076	LISC043076	4008	Torre, A.R.													PRESENT	folha de herbÃ¡rio							Arbusto de 4 a 5 m. Flores brancas.
813387368				CC_BY_NC_4_0					Collection				IICT	LISC			PRESERVED_SPECIMEN				urn:lsid:iict.pt:LISC:LISC043075	LISC043075	3399	Torre, A.R.							fruto						PRESENT	folha de herbÃ¡rio, cÃ¡psula							Ãrvore 5 a 7 m.
813387367				CC_BY_NC_4_0					Collection				IICT	LISC			PRESERVED_SPECIMEN				urn:lsid:iict.pt:LISC:LISC043074	LISC043074	3073	Torre, A.R.							fruto						PRESENT	cÃ¡psula, folha de herbÃ¡rio							Arbusto de 4 m.
813387366				CC_BY_NC_4_0					Collection				IICT	LISC			PRESERVED_SPECIMEN				urn:lsid:iict.pt:LISC:LISC043073	LISC043073	2954	Torre, A.R.							fruto						PRESENT	folha de herbÃ¡rio, cÃ¡psula							Arbusto ou pequena Ã¡rvore. Frutos alaranjados.
813366207				CC_BY_NC_4_0					Collection				IICT	LISC			PRESERVED_SPECIMEN				urn:lsid:iict.pt:LISC:LISC019405	LISC019405	8199	Gossweiler, J.													PRESENT	folha de herbÃ¡rio						LISJC 00721	Ãrvore muito comum lembrando um arbusto por ser ainda nova.
813366206				CC_BY_NC_4_0					Collection				IICT	LISC			PRESERVED_SPECIMEN				urn:lsid:iict.pt:LISC:LISC019404	LISC019404	8199	Gossweiler, J.													PRESENT	folha de herbÃ¡rio						LISJC 00728	Ãrvore muito comum lembrando um arbusto por ser ainda nova.
813366205				CC_BY_NC_4_0					Collection				IICT	LISC			PRESERVED_SPECIMEN				urn:lsid:iict.pt:LISC:LISC019403	LISC019403	8199	Gossweiler, J.													PRESENT	folha de herbÃ¡rio						LISJC 00727	Ãrvore muito comum lembrando um arbusto por ser ainda nova.
813366204				CC_BY_NC_4_0					Collection				IICT	LISC			PRESERVED_SPECIMEN				urn:lsid:iict.pt:LISC:LISC019402	LISC019402	8199	Gossweiler, J.													PRESENT	folha de herbÃ¡rio						LISJC 00726	Ãrvore muito comum lembrando um arbusto por ser ainda nova.
813366203				CC_BY_NC_4_0					Collection				IICT	LISC			PRESERVED_SPECIMEN				urn:lsid:iict.pt:LISC:LISC019401	LISC019401	8199	Gossweiler, J.													PRESENT	folha de herbÃ¡rio						LISJC 00729	Ãrvore muito comum lembrando um arbusto por ser ainda nova.
813366202				CC_BY_NC_4_0					Collection				IICT	LISC			PRESERVED_SPECIMEN				urn:lsid:iict.pt:LISC:LISC019400	LISC019400	8199	Gossweiler, J.													PRESENT	folha de herbÃ¡rio						LISJC 00722	Ãrvore muito comum lembrando um arbusto por ser ainda nova.
813366201				CC_BY_NC_4_0					Collection				IICT	LISC			PRESERVED_SPECIMEN				urn:lsid:iict.pt:LISC:LISC019399	LISC019399	8199	Gossweiler, J.													PRESENT	folha de herbÃ¡rio						LISJC 00724	Ãrvore muito comum lembrando um arbusto por ser ainda nova.
813366200				CC_BY_NC_4_0					Collection				IICT	LISC			PRESERVED_SPECIMEN				urn:lsid:iict.pt:LISC:LISC019398	LISC019398	8199	Gossweiler, J.													PRESENT	folha de herbÃ¡rio						LISJC 00723	Ãrvore muito comum lembrando um arbusto por ser ainda nova.
813366199				CC_BY_NC_4_0					Collection				IICT	LISC			PRESERVED_SPECIMEN				urn:lsid:iict.pt:LISC:LISC019397	LISC019397	8199	Gossweiler, J.													PRESENT	folha de herbÃ¡rio						LISJC 00725	Ãrvore muito comum lembrando um arbusto por ser ainda nova.
813366198				CC_BY_NC_4_0					Collection				IICT	LISC			PRESERVED_SPECIMEN				urn:lsid:iict.pt:LISC:LISC019396	LISC019396	7849	Gossweiler, J.													PRESENT	folha de herbÃ¡rio						LISJC 00720	Trepadeira lenhosa com tronco delgado ascendente, flexÃ­vel, atingindo 30 m de altura, ramos numerosos sarmentosos. Flores em panÃ­culas terminais de corola branca. Seiva avermelhada.
813366197				CC_BY_NC_4_0					Collection				IICT	LISC			PRESERVED_SPECIMEN				urn:lsid:iict.pt:LISC:LISC019395	LISC019395	7849	Gossweiler, J.													PRESENT	folha de herbÃ¡rio						LISJC 00712	Trepadeira lenhosa com tronco delgado ascendente, flexÃ­vel, atingindo 30 m de altura, ramos numerosos sarmentosos. Flores em panÃ­culas terminais de corola branca. Seiva avermelhada.
813366196				CC_BY_NC_4_0					Collection				IICT	LISC			PRESERVED_SPECIMEN				urn:lsid:iict.pt:LISC:LISC019394	LISC019394	7849	Gossweiler, J.													PRESENT	folha de herbÃ¡rio						LISJC 00713	[dub] Trepadeira lenhosa com tronco delgado ascendente, flexÃ­vel, atingindo 30 m de altura, ramos numerosos sarmentosos. Flores em panÃ­culas terminais de corola branca. Seiva avermelhada.// Trepadeira de 20,0 m de altura, ramos virgados, flores brancas.
813366195				CC_BY_NC_4_0					Collection				IICT	LISC			PRESERVED_SPECIMEN				urn:lsid:iict.pt:LISC:LISC019393	LISC019393	7849	Gossweiler, J.													PRESENT	folha de herbÃ¡rio						LISJC 00714	Trepadeira lenhosa com tronco delgado ascendente, flexÃ­vel, atingindo 30 m de altura, ramos numerosos sarmentosos. Flores em panÃ­culas terminais de corola branca. Seiva avermelhada.
813366194				CC_BY_NC_4_0					Collection				IICT	LISC			PRESERVED_SPECIMEN				urn:lsid:iict.pt:LISC:LISC019392	LISC019392	7849	Gossweiler, J.													PRESENT	folha de herbÃ¡rio						LISJC 00716	[dub] Trepadeira lenhosa com tronco delgado ascendente, flexÃ­vel, atingindo 30 m de altura, ramos numerosos sarmentosos. Flores em panÃ­culas terminais de corola branca. Seiva avermelhada.// Trepadeira de 20,0 m de altura, tronco delgado, ramos virgados.
813366193				CC_BY_NC_4_0					Collection				IICT	LISC			PRESERVED_SPECIMEN				urn:lsid:iict.pt:LISC:LISC019391	LISC019391	7849	Gossweiler, J.													PRESENT	folha de herbÃ¡rio						LISJC 00717	Trepadeira lenhosa com tronco delgado ascendente, flexÃ­vel, atingindo 30 m de altura, ramos numerosos sarmentosos. Flores em panÃ­culas terminais de corola branca. Seiva avermelhada.
813366192				CC_BY_NC_4_0					Collection				IICT	LISC			PRESERVED_SPECIMEN				urn:lsid:iict.pt:LISC:LISC019390	LISC019390	7849	Gossweiler, J.													PRESENT	folha de herbÃ¡rio						LISJC 00718	Trepadeira lenhosa com tronco delgado ascendente, flexÃ­vel, atingindo 30 m de altura, ramos numerosos sarmentosos. Flores em panÃ­culas terminais de corola branca. Seiva avermelhada.
813366191				CC_BY_NC_4_0					Collection				IICT	LISC			PRESERVED_SPECIMEN				urn:lsid:iict.pt:LISC:LISC019389	LISC019389	7849	Gossweiler, J.													PRESENT	folha de herbÃ¡rio						LISJC 00719	Trepadeira lenhosa com tronco delgado ascendente, flexÃ­vel, atingindo 30 m de altura, ramos numerosos sarmentosos. Flores em panÃ­culas terminais de corola branca. Seiva avermelhada.
813366190				CC_BY_NC_4_0					Collection				IICT	LISC			PRESERVED_SPECIMEN				urn:lsid:iict.pt:LISC:LISC019388	LISC019388	7849	Gossweiler, J.													PRESENT	folha de herbÃ¡rio						LISJC 00715	Trepadeira lenhosa com tronco delgado ascendente, flexÃ­vel, atingindo 30 m de altura, ramos numerosos sarmentosos. Flores em panÃ­culas terminais de corola branca. Seiva avermelhada.
813366189				CC_BY_NC_4_0					Collection				IICT	LISC			PRESERVED_SPECIMEN				urn:lsid:iict.pt:LISC:LISC019387	LISC019387	9188	Barbosa, L.A.G., Henriques, C.													PRESENT	folha de herbÃ¡rio							Arbusto de 2-3 m. Flores brancas. Frutos amarelo-alaranjados.
813365954				CC_BY_NC_4_0					Collection				IICT	LISC			PRESERVED_SPECIMEN				urn:lsid:iict.pt:LISC:LISC019143	LISC019143	613	Cameira, F.J.M.													PRESENT	folha de herbÃ¡rio
813365953				CC_BY_NC_4_0					Collection				IICT	LISC			PRESERVED_SPECIMEN				urn:lsid:iict.pt:LISC:LISC019142	LISC019142	141	AraÃºjo, V.P.													PRESENT	folha de herbÃ¡rio						LUA 13180	Pequena Ã¡rvore de 5 a 6 m de altura de tronco estreito, mais ou menos direito, copada, por vezes com fÃ¡cies de arbusto. Flores em umbelas brancas pequenas, levemente pintalgadas, pubescentes, perfumadas.
813365952				CC_BY_NC_4_0					Collection				IICT	LISC			PRESERVED_SPECIMEN				urn:lsid:iict.pt:LISC:LISC019141	LISC019141	141	AraÃºjo, V.P.													PRESENT	folha de herbÃ¡rio							Pequena Ã¡rvore de 5 a 6 m de altura de tronco estreito, mais ou menos direito, copada, por vezes com fÃ¡cies de arbusto. Flores em umbelas brancas pequenas, levemente pintalgadas, pubescentes, perfumadas.
813365951				CC_BY_NC_4_0					Collection				IICT	LISC			PRESERVED_SPECIMEN				urn:lsid:iict.pt:LISC:LISC019140	LISC019140	ANG.VI.54. - 47	Machado, A.B.							fruto						PRESENT	folha de herbÃ¡rio
813365950				CC_BY_NC_4_0					Collection				IICT	LISC			PRESERVED_SPECIMEN				urn:lsid:iict.pt:LISC:LISC019139	LISC019139	ANG. VEG. 165	Machado, A.B.							fruto						PRESENT	folha de herbÃ¡rio
813365949				CC_BY_NC_4_0					Collection				IICT	LISC			PRESERVED_SPECIMEN				urn:lsid:iict.pt:LISC:LISC019138	LISC019138	8199	Gossweiler, J.													PRESENT	folha de herbÃ¡rio						LISJC 00705
813365948				CC_BY_NC_4_0					Collection				IICT	LISC			PRESERVED_SPECIMEN				urn:lsid:iict.pt:LISC:LISC019137	LISC019137	8199	Gossweiler, J.													PRESENT	folha de herbÃ¡rio						LISJC 00704	Ãrvore de 4,0 m de altura; Derubadas.
813365947				CC_BY_NC_4_0					Collection				IICT	LISC			PRESERVED_SPECIMEN				urn:lsid:iict.pt:LISC:LISC019136	LISC019136	8199	Gossweiler, J.													PRESENT	folha de herbÃ¡rio						LISJC 00703
813365946				CC_BY_NC_4_0					Collection				IICT	LISC			PRESERVED_SPECIMEN				urn:lsid:iict.pt:LISC:LISC019135	LISC019135															PRESENT	folha de herbÃ¡rio						LISJC 00706
813365945				CC_BY_NC_4_0					Collection				IICT	LISC			PRESERVED_SPECIMEN				urn:lsid:iict.pt:LISC:LISC019134	LISC019134															PRESENT	folha de herbÃ¡rio						LISJC 00707
813365944				CC_BY_NC_4_0					Collection				IICT	LISC			PRESERVED_SPECIMEN				urn:lsid:iict.pt:LISC:LISC019133	LISC019133	8199	Gossweiler, J.													PRESENT	folha de herbÃ¡rio						LISJC 00708
813365943				CC_BY_NC_4_0					Collection				IICT	LISC			PRESERVED_SPECIMEN				urn:lsid:iict.pt:LISC:LISC019132	LISC019132	5745														PRESENT	folha de herbÃ¡rio						LISJC 00701	Arbusto de 3,0 m de altura, ramos em verticilasto.
813365942				CC_BY_NC_4_0					Collection				IICT	LISC			PRESERVED_SPECIMEN				urn:lsid:iict.pt:LISC:LISC019131	LISC019131	7845	Gossweiler, J.													PRESENT	folha de herbÃ¡rio						LISJC 00702
813365941				CC_BY_NC_4_0					Collection				IICT	LISC			PRESERVED_SPECIMEN				urn:lsid:iict.pt:LISC:LISC019130	LISC019130	697	Almeida, V.													PRESENT	folha de herbÃ¡rio
813365940				CC_BY_NC_4_0					Collection				IICT	LISC			PRESERVED_SPECIMEN				urn:lsid:iict.pt:LISC:LISC019129	LISC019129	697	Almeida, V.													PRESENT	folha de herbÃ¡rio
813365939				CC_BY_NC_4_0					Collection				IICT	LISC			PRESERVED_SPECIMEN				urn:lsid:iict.pt:LISC:LISC019128	LISC019128	718	M.E.F.A.,													PRESENT	folha de herbÃ¡rio						LISJC 40163	Ãrvore de cerca de 15 m. com flores brancas, em cachos. Folhas com coloraÃ§Ã£o amarelo-acastanhado na pÃ¡gina inferior.| | A madeira Ã© usada pelos indÃ­genas em carpintaria e o latex de cor de iodo, para tratamentos de ferid
813365938				CC_BY_NC_4_0					Collection				IICT	LISC			PRESERVED_SPECIMEN				urn:lsid:iict.pt:LISC:LISC019127	LISC019127	718	M.E.F.A.,													PRESENT	folha de herbÃ¡rio						LISJC 40164	Ãrvore de cerca de 15 m. com flores brancas, em cachos. Folhas com coloraÃ§Ã£o amarelo-acastanhado na pÃ¡gina inferior.|A madeira Ã© usada pelos indÃ­genas em carpintaria e o latex de cor de iodo, para tratamentos de ferid | A madeira Ã© usada pelos indÃ­genas em carpintaria e o latex de cor de iodo, para tratamentos de ferid
813365937				CC_BY_NC_4_0					Collection				IICT	LISC			PRESERVED_SPECIMEN				urn:lsid:iict.pt:LISC:LISC019126	LISC019126	304	M.E.F.A.,													PRESENT	folha de herbÃ¡rio						LISJC 38632	Ãrvore de 10-15 m. de altura com inflorescÃªncia branco-amarelada.
813365936				CC_BY_NC_4_0					Collection				IICT	LISC			PRESERVED_SPECIMEN				urn:lsid:iict.pt:LISC:LISC019125	LISC019125	304	M.E.F.A.,													PRESENT	folha de herbÃ¡rio						LISJC 38632	Ãrvore de 10-15 m. de altura com inflorescÃªncia branco-amarelada.
813365935				CC_BY_NC_4_0					Collection				IICT	LISC			PRESERVED_SPECIMEN				urn:lsid:iict.pt:LISC:LISC019124	LISC019124	304	M.E.F.A.,													PRESENT	folha de herbÃ¡rio						LISJC 38633	Ãrvore de 10-15 m. de altura com inflorescÃªncia branco-amarelada.
813365934				CC_BY_NC_4_0					Collection				IICT	LISC			PRESERVED_SPECIMEN				urn:lsid:iict.pt:LISC:LISC019123	LISC019123	507	M.E.F.A.,							flor e fruto						PRESENT	folha de herbÃ¡rio						LISJC 33926	Ãrvore de 10-15 m. Folhas grandes opostas. Flores em inflorescÃªncias grupadas e frutos pequenos, amarelos.| | Os indÃ­genas usam o latex para curar as infecÃ§Ãµes das feridas.
813365933				CC_BY_NC_4_0					Collection				IICT	LISC			PRESERVED_SPECIMEN				urn:lsid:iict.pt:LISC:LISC019122	LISC019122	507	M.E.F.A.,							flor e fruto						PRESENT	folha de herbÃ¡rio						LISJC 38927	Ãrvore de 10-15 m. Folhas grandes opostas. Flores em inflorescÃªncias grupadas e frutos pequenos, amarelos.|Os indÃ­genas usam o latex para curar as infecÃ§Ãµes das feridas. | Os indÃ­genas usam o latex para curar as infecÃ§Ãµes das feridas.
813365932				CC_BY_NC_4_0					Collection				IICT	LISC			PRESERVED_SPECIMEN				urn:lsid:iict.pt:LISC:LISC019121	LISC019121	507	M.E.F.A.,							flor e fruto						PRESENT	folha de herbÃ¡rio						LISJC 38926	Ãrvore de 10-15 m. Folhas grandes opostas. Flores em inflorescÃªncias grupadas e frutos pequenos, amarelos.|Os indÃ­genas usam o latex para curar as infecÃ§Ãµes das feridas. | Os indÃ­genas usam o latex para curar as infecÃ§Ãµes das feridas.
813365931				CC_BY_NC_4_0					Collection				IICT	LISC			PRESERVED_SPECIMEN				urn:lsid:iict.pt:LISC:LISC019120	LISC019120	507	M.E.F.A.,							flor e fruto						PRESENT	folha de herbÃ¡rio						LISJC 38927	Ãrvore de 10-15 m. Folhas grandes opostas. Flores em inflorescÃªncias grupadas e frutos pequenos, amarelos.|Os indÃ­genas usam o latex para curar as infecÃ§Ãµes das feridas. | Os indÃ­genas usam o latex para curar as infecÃ§Ãµes das feridas.
813365930				CC_BY_NC_4_0					Collection				IICT	LISC			PRESERVED_SPECIMEN				urn:lsid:iict.pt:LISC:LISC019119	LISC019119	606	Exell, A.W., MendonÃ§a, F.A.													PRESENT	folha de herbÃ¡rio
813365929				CC_BY_NC_4_0					Collection				IICT	LISC			PRESERVED_SPECIMEN				urn:lsid:iict.pt:LISC:LISC019118	LISC019118	95	Andrada, E.C.													PRESENT	folha de herbÃ¡rio							Arbusto de 4-5 m de altura.
813365928				CC_BY_NC_4_0					Collection				IICT	LISC			PRESERVED_SPECIMEN				urn:lsid:iict.pt:LISC:LISC019117	LISC019117	253	Cameira, F.J.M.													PRESENT	folha de herbÃ¡rio
813365927				CC_BY_NC_4_0					Collection				IICT	LISC			PRESERVED_SPECIMEN				urn:lsid:iict.pt:LISC:LISC019116	LISC019116	253	Cameira, F.J.M.													PRESENT	folha de herbÃ¡rio
813365926				CC_BY_NC_4_0					Collection				IICT	LISC			PRESERVED_SPECIMEN				urn:lsid:iict.pt:LISC:LISC019115	LISC019115	107	Cameira, F.J.M.													PRESENT	folha de herbÃ¡rio
813365925				CC_BY_NC_4_0					Collection				IICT	LISC			PRESERVED_SPECIMEN				urn:lsid:iict.pt:LISC:LISC019114	LISC019114	107	Cameira, F.J.M.													PRESENT	folha de herbÃ¡rio
813365924				CC_BY_NC_4_0					Collection				IICT	LISC			PRESERVED_SPECIMEN				urn:lsid:iict.pt:LISC:LISC019113	LISC019113	363	Pinto, H.V.							fruto						PRESENT	folha de herbÃ¡rio
813365923				CC_BY_NC_4_0					Collection				IICT	LISC			PRESERVED_SPECIMEN				urn:lsid:iict.pt:LISC:LISC019112	LISC019112	363	Pinto, H.V.							fruto						PRESENT	folha de herbÃ¡rio
813365922				CC_BY_NC_4_0					Collection				IICT	LISC			PRESERVED_SPECIMEN				urn:lsid:iict.pt:LISC:LISC019111	LISC019111	289	Monteiro, R.F.R., Santos, R.M., Murta, F.													PRESENT	folha de herbÃ¡rio							Ãrvore de porte mÃ©dio.
813365921				CC_BY_NC_4_0					Collection				IICT	LISC			PRESERVED_SPECIMEN				urn:lsid:iict.pt:LISC:LISC019110	LISC019110	19	Murta, F.							flor e fruto						PRESENT	folha de herbÃ¡rio							Ãrvore de 4-5 m., podendo atingir 10 m., flores brancas.
813365920				CC_BY_NC_4_0					Collection				IICT	LISC			PRESERVED_SPECIMEN				urn:lsid:iict.pt:LISC:LISC019109	LISC019109	1871	Monteiro, R.F.R., Murta, F.							fruto						PRESENT	folha de herbÃ¡rio							Ãrvore de 3 metros, com flores amareladas, frutos esfÃ©ricos, pequenos, com o Ã¡pice avermelhado quando se paroxima da maturaÃ§Ã£o.
813365919				CC_BY_NC_4_0					Collection				IICT	LISC			PRESERVED_SPECIMEN				urn:lsid:iict.pt:LISC:LISC019108	LISC019108	599	Cameira, F.J.M.							fruto						PRESENT	folha de herbÃ¡rio
813365918				CC_BY_NC_4_0					Collection				IICT	LISC			PRESERVED_SPECIMEN				urn:lsid:iict.pt:LISC:LISC019107	LISC019107	599	Cameira, F.J.M.							fruto						PRESENT	folha de herbÃ¡rio
813365917				CC_BY_NC_4_0					Collection				IICT	LISC			PRESERVED_SPECIMEN				urn:lsid:iict.pt:LISC:LISC019106	LISC019106	1405	Santos, R.M.													PRESENT	folha de herbÃ¡rio							Pequena Ã¡rvore de 5-6 m.; flores branco sujo.
813365916				CC_BY_NC_4_0					Collection				IICT	LISC			PRESERVED_SPECIMEN				urn:lsid:iict.pt:LISC:LISC019105	LISC019105	7588	Teixeira, J.M.L.B., Pedro,							fruto						PRESENT	folha de herbÃ¡rio							Ãrvore muito ramificada formando uma copa achatada. Tronco acastanhado com pequenos sulcos longitudinais. Folhas mais claras no verso e feltrosas.
813365915				CC_BY_NC_4_0					Collection				IICT	LISC			PRESERVED_SPECIMEN				urn:lsid:iict.pt:LISC:LISC019104	LISC019104	1646	Santos, R.M.							fruto						PRESENT	folha de herbÃ¡rio
813365914				CC_BY_NC_4_0					Collection				IICT	LISC			PRESERVED_SPECIMEN				urn:lsid:iict.pt:LISC:LISC019103	LISC019103	1569	Gouveia, A.C.P.													PRESENT	folha de herbÃ¡rio							Arbusto com cerca de 5 m. Flores minusculas brancas.
813365913				CC_BY_NC_4_0					Collection				IICT	LISC			PRESERVED_SPECIMEN				urn:lsid:iict.pt:LISC:LISC019102	LISC019102	1871	Monteiro, R.F.R., Murta, F.							flor e fruto						PRESENT	folha de herbÃ¡rio							Ãrvore de 3 metros, com flores amareladas, frutos esfÃ©ricos, pequenos, com o Ã¡pice avermelhado quando se aproxima da maturaÃ§Ã£o.
813365912				CC_BY_NC_4_0					Collection				IICT	LISC			PRESERVED_SPECIMEN				urn:lsid:iict.pt:LISC:LISC019101	LISC019101	2737	Silva, M.													PRESENT	folha de herbÃ¡rio							Ãrvore com cerca de 12 m de altura; com os ramos patentes.
813365911				CC_BY_NC_4_0					Collection				IICT	LISC			PRESERVED_SPECIMEN				urn:lsid:iict.pt:LISC:LISC019100	LISC019100	2274	Silva, M.													PRESENT	folha de herbÃ¡rio							Ãrvore de cerca de 7 m de altura, muito ramosa na parte superor, formando copa larga.
813365910				CC_BY_NC_4_0					Collection				IICT	LISC			PRESERVED_SPECIMEN				urn:lsid:iict.pt:LISC:LISC019099	LISC019099	7515	Teixeira, J.M.L.B., Gerez, A.G.							fruto						PRESENT	folha de herbÃ¡rio							Arbusto.| | O lÃ­quido leitoso extraÃ­do do tronco Ã© utilizado pelos indÃ­genas para cicatrizar feridas.
813365909				CC_BY_NC_4_0					Collection				IICT	LISC			PRESERVED_SPECIMEN				urn:lsid:iict.pt:LISC:LISC019098	LISC019098	303	Raimundo, A.F., Matos, G.C., Figueira, J.M.							fruto						PRESENT	folha de herbÃ¡rio							Arbusto de 3 a 4 m de altura. Rebentos novos e nervuras das folhas na pÃ¡gina inferior cobertos de indumento ferruginoso. Frutos em cachos, globosos, pequenos.
813365908				CC_BY_NC_4_0					Collection				IICT	LISC			PRESERVED_SPECIMEN				urn:lsid:iict.pt:LISC:LISC019097	LISC019097	88a	Raimundo, A.F., Matos, G.C., Sousa, J.B.N.B.													PRESENT	folha de herbÃ¡rio							Arbusto muito ramificado de 3,5 a 5 m de altura folhas e raminhos com indumento ferruginoso. Flores brancas.
813365907				CC_BY_NC_4_0					Collection				IICT	LISC			PRESERVED_SPECIMEN				urn:lsid:iict.pt:LISC:LISC019096	LISC019096	1413	Dechamps, R., Murta, F., Silva, M.													PRESENT	folha de herbÃ¡rio							Petit arbre de 7 m. de haut, tronc de 3 m. et 25 cm. de diam.
813343856				CC_BY_NC_4_0					Collection				IICT	LISC			PRESERVED_SPECIMEN				urn:lsid:iict.pt:LISC:LISC000593	LISC000593	4365	LÃ©onard, A.													PRESENT	folha de herbÃ¡rio							Liana de 3-4 cm de diÃ¢metro.
731781260				CC_BY_4_0						http://grbio.org/institution/museum-national-dhistoire-naturelle			MNHN	P			PRESERVED_SPECIMEN				http://coldb.mnhn.fr/catalognumber/mnhn/p/p04897825	P04897825															PRESENT	hb
731733595				CC_BY_4_0						http://grbio.org/institution/museum-national-dhistoire-naturelle			MNHN	P			PRESERVED_SPECIMEN				http://coldb.mnhn.fr/catalognumber/mnhn/p/p04898456	P04898456															PRESENT	hb
731726004				CC_BY_4_0						http://grbio.org/institution/museum-national-dhistoire-naturelle			MNHN	P			PRESERVED_SPECIMEN				http://coldb.mnhn.fr/catalognumber/mnhn/p/p04899049	P04899049															PRESENT	hb
731688171				CC_BY_4_0						http://grbio.org/institution/museum-national-dhistoire-naturelle			MNHN	P			PRESERVED_SPECIMEN				http://coldb.mnhn.fr/catalognumber/mnhn/p/p04899101	P04899101															PRESENT	hb
731688030				CC_BY_4_0						http://grbio.org/institution/museum-national-dhistoire-naturelle			MNHN	P			PRESERVED_SPECIMEN				http://coldb.mnhn.fr/catalognumber/mnhn/p/p04898205	P04898205															PRESENT	hb
731687931				CC_BY_4_0						http://grbio.org/institution/museum-national-dhistoire-naturelle			MNHN	P			PRESERVED_SPECIMEN				http://coldb.mnhn.fr/catalognumber/mnhn/p/p04898615	P04898615															PRESENT	hb
731687670				CC_BY_4_0						http://grbio.org/institution/museum-national-dhistoire-naturelle			MNHN	P			PRESERVED_SPECIMEN				http://coldb.mnhn.fr/catalognumber/mnhn/p/p04898879	P04898879															PRESENT	hb
731687406				CC_BY_4_0						http://grbio.org/institution/museum-national-dhistoire-naturelle			MNHN	P			PRESERVED_SPECIMEN				http://coldb.mnhn.fr/catalognumber/mnhn/p/p04899050	P04899050															PRESENT	hb
731570513				CC_BY_4_0						http://grbio.org/institution/museum-national-dhistoire-naturelle			MNHN	P			PRESERVED_SPECIMEN				http://coldb.mnhn.fr/catalognumber/mnhn/p/p05478688	P05478688															PRESENT	hb
731569885				CC_BY_4_0						http://grbio.org/institution/museum-national-dhistoire-naturelle			MNHN	P			PRESERVED_SPECIMEN				http://coldb.mnhn.fr/catalognumber/mnhn/p/p05602400	P05602400															PRESENT	hb
731493447				CC_BY_4_0						http://grbio.org/institution/museum-national-dhistoire-naturelle			MNHN	P			PRESERVED_SPECIMEN				http://coldb.mnhn.fr/catalognumber/mnhn/p/p05602399	P05602399															PRESENT	hb
731492433				CC_BY_4_0						http://grbio.org/institution/museum-national-dhistoire-naturelle			MNHN	P			PRESERVED_SPECIMEN				http://coldb.mnhn.fr/catalognumber/mnhn/p/p04899404	P04899404															PRESENT	hb
731366199				CC_BY_4_0						http://grbio.org/institution/museum-national-dhistoire-naturelle			MNHN	P			PRESERVED_SPECIMEN				http://coldb.mnhn.fr/catalognumber/mnhn/p/p04899406	P04899406															PRESENT	hb
731366197				CC_BY_4_0						http://grbio.org/institution/museum-national-dhistoire-naturelle			MNHN	P			PRESERVED_SPECIMEN				http://coldb.mnhn.fr/catalognumber/mnhn/p/p04899405	P04899405															PRESENT	hb
731366195				CC_BY_4_0						http://grbio.org/institution/museum-national-dhistoire-naturelle			MNHN	P			PRESERVED_SPECIMEN				http://coldb.mnhn.fr/catalognumber/mnhn/p/p04899403	P04899403															PRESENT	hb
731362300				CC_BY_4_0						http://grbio.org/institution/museum-national-dhistoire-naturelle			MNHN	P			PRESERVED_SPECIMEN				http://coldb.mnhn.fr/catalognumber/mnhn/p/p04898442	P04898442															PRESENT	hb
731362297				CC_BY_4_0						http://grbio.org/institution/museum-national-dhistoire-naturelle			MNHN	P			PRESERVED_SPECIMEN				http://coldb.mnhn.fr/catalognumber/mnhn/p/p04898441	P04898441															PRESENT	hb
731362013				CC_BY_4_0						http://grbio.org/institution/museum-national-dhistoire-naturelle			MNHN	P			PRESERVED_SPECIMEN				http://coldb.mnhn.fr/catalognumber/mnhn/p/p04897831	P04897831															PRESENT	hb
731362012				CC_BY_4_0						http://grbio.org/institution/museum-national-dhistoire-naturelle			MNHN	P			PRESERVED_SPECIMEN				http://coldb.mnhn.fr/catalognumber/mnhn/p/p04897830	P04897830															PRESENT	hb
731362011				CC_BY_4_0						http://grbio.org/institution/museum-national-dhistoire-naturelle			MNHN	P			PRESERVED_SPECIMEN				http://coldb.mnhn.fr/catalognumber/mnhn/p/p04897829	P04897829															PRESENT	hb
731362009				CC_BY_4_0						http://grbio.org/institution/museum-national-dhistoire-naturelle			MNHN	P			PRESERVED_SPECIMEN				http://coldb.mnhn.fr/catalognumber/mnhn/p/p04897828	P04897828															PRESENT	hb
731362007				CC_BY_4_0						http://grbio.org/institution/museum-national-dhistoire-naturelle			MNHN	P			PRESERVED_SPECIMEN				http://coldb.mnhn.fr/catalognumber/mnhn/p/p04897827	P04897827															PRESENT	hb
731362005				CC_BY_4_0						http://grbio.org/institution/museum-national-dhistoire-naturelle			MNHN	P			PRESERVED_SPECIMEN				http://coldb.mnhn.fr/catalognumber/mnhn/p/p04897826	P04897826															PRESENT	hb
731362002				CC_BY_4_0						http://grbio.org/institution/museum-national-dhistoire-naturelle			MNHN	P			PRESERVED_SPECIMEN				http://coldb.mnhn.fr/catalognumber/mnhn/p/p04897824	P04897824															PRESENT	hb
731362000				CC_BY_4_0						http://grbio.org/institution/museum-national-dhistoire-naturelle			MNHN	P			PRESERVED_SPECIMEN				http://coldb.mnhn.fr/catalognumber/mnhn/p/p04897823	P04897823															PRESENT	hb
731361998				CC_BY_4_0						http://grbio.org/institution/museum-national-dhistoire-naturelle			MNHN	P			PRESERVED_SPECIMEN				http://coldb.mnhn.fr/catalognumber/mnhn/p/p04897822	P04897822															PRESENT	hb
731361997				CC_BY_4_0						http://grbio.org/institution/museum-national-dhistoire-naturelle			MNHN	P			PRESERVED_SPECIMEN				http://coldb.mnhn.fr/catalognumber/mnhn/p/p04897821	P04897821															PRESENT	hb
731361995				CC_BY_4_0						http://grbio.org/institution/museum-national-dhistoire-naturelle			MNHN	P			PRESERVED_SPECIMEN				http://coldb.mnhn.fr/catalognumber/mnhn/p/p04897820	P04897820															PRESENT	hb
731361993				CC_BY_4_0						http://grbio.org/institution/museum-national-dhistoire-naturelle			MNHN	P			PRESERVED_SPECIMEN				http://coldb.mnhn.fr/catalognumber/mnhn/p/p04897819	P04897819															PRESENT	hb
731361992				CC_BY_4_0						http://grbio.org/institution/museum-national-dhistoire-naturelle			MNHN	P			PRESERVED_SPECIMEN				http://coldb.mnhn.fr/catalognumber/mnhn/p/p04897814	P04897814															PRESENT	hb
731361991				CC_BY_4_0						http://grbio.org/institution/museum-national-dhistoire-naturelle			MNHN	P			PRESERVED_SPECIMEN				http://coldb.mnhn.fr/catalognumber/mnhn/p/p04897813	P04897813															PRESENT	hb
731361989				CC_BY_4_0						http://grbio.org/institution/museum-national-dhistoire-naturelle			MNHN	P			PRESERVED_SPECIMEN				http://coldb.mnhn.fr/catalognumber/mnhn/p/p04897812	P04897812															PRESENT	hb
731361986				CC_BY_4_0						http://grbio.org/institution/museum-national-dhistoire-naturelle			MNHN	P			PRESERVED_SPECIMEN				http://coldb.mnhn.fr/catalognumber/mnhn/p/p04897811	P04897811															PRESENT	hb
731361985				CC_BY_4_0						http://grbio.org/institution/museum-national-dhistoire-naturelle			MNHN	P			PRESERVED_SPECIMEN				http://coldb.mnhn.fr/catalognumber/mnhn/p/p04897810	P04897810															PRESENT	hb
731358989				CC_BY_4_0						http://grbio.org/institution/museum-national-dhistoire-naturelle			MNHN	P			PRESERVED_SPECIMEN				http://coldb.mnhn.fr/catalognumber/mnhn/p/p04898917	P04898917															PRESENT	hb
731358987				CC_BY_4_0						http://grbio.org/institution/museum-national-dhistoire-naturelle			MNHN	P			PRESERVED_SPECIMEN				http://coldb.mnhn.fr/catalognumber/mnhn/p/p04898916	P04898916															PRESENT	hb
731358985				CC_BY_4_0						http://grbio.org/institution/museum-national-dhistoire-naturelle			MNHN	P			PRESERVED_SPECIMEN				http://coldb.mnhn.fr/catalognumber/mnhn/p/p04898915	P04898915															PRESENT	hb
731358983				CC_BY_4_0						http://grbio.org/institution/museum-national-dhistoire-naturelle			MNHN	P			PRESERVED_SPECIMEN				http://coldb.mnhn.fr/catalognumber/mnhn/p/p04898914	P04898914															PRESENT	hb
731358981				CC_BY_4_0						http://grbio.org/institution/museum-national-dhistoire-naturelle			MNHN	P			PRESERVED_SPECIMEN				http://coldb.mnhn.fr/catalognumber/mnhn/p/p04898913	P04898913															PRESENT	hb
731358979				CC_BY_4_0						http://grbio.org/institution/museum-national-dhistoire-naturelle			MNHN	P			PRESERVED_SPECIMEN				http://coldb.mnhn.fr/catalognumber/mnhn/p/p04898912	P04898912															PRESENT	hb
695174477				CC_BY_4_0	2003-12-03T00:00:00Z								RMCA-Metafro-Infosys	Xylarium			PRESERVED_SPECIMEN					S06023															PRESENT
695174474				CC_BY_4_0	2003-12-03T00:00:00Z								RMCA-Metafro-Infosys	Xylarium			PRESERVED_SPECIMEN					S06022															PRESENT
695174260				CC_BY_4_0	2003-12-03T00:00:00Z								RMCA-Metafro-Infosys	Xylarium			PRESERVED_SPECIMEN					S13171															PRESENT
694845941				CC_BY_4_0						http://grbio.org/institution/museum-national-dhistoire-naturelle			MNHN	P			PRESERVED_SPECIMEN				http://coldb.mnhn.fr/catalognumber/mnhn/p/p04667701	P04667701															PRESENT	hb
694845940				CC_BY_4_0						http://grbio.org/institution/museum-national-dhistoire-naturelle			MNHN	P			PRESERVED_SPECIMEN				http://coldb.mnhn.fr/catalognumber/mnhn/p/p04667699	P04667699															PRESENT	hb
694845939				CC_BY_4_0						http://grbio.org/institution/museum-national-dhistoire-naturelle			MNHN	P			PRESERVED_SPECIMEN				http://coldb.mnhn.fr/catalognumber/mnhn/p/p04667697	P04667697															PRESENT	hb
694845938				CC_BY_4_0						http://grbio.org/institution/museum-national-dhistoire-naturelle			MNHN	P			PRESERVED_SPECIMEN				http://coldb.mnhn.fr/catalognumber/mnhn/p/p04667693	P04667693															PRESENT	hb
694845937				CC_BY_4_0						http://grbio.org/institution/museum-national-dhistoire-naturelle			MNHN	P			PRESERVED_SPECIMEN				http://coldb.mnhn.fr/catalognumber/mnhn/p/p04667687	P04667687															PRESENT	hb
694845936				CC_BY_4_0						http://grbio.org/institution/museum-national-dhistoire-naturelle			MNHN	P			PRESERVED_SPECIMEN				http://coldb.mnhn.fr/catalognumber/mnhn/p/p04667684	P04667684															PRESENT	hb
694845935				CC_BY_4_0						http://grbio.org/institution/museum-national-dhistoire-naturelle			MNHN	P			PRESERVED_SPECIMEN				http://coldb.mnhn.fr/catalognumber/mnhn/p/p04667679	P04667679															PRESENT	hb
694845934				CC_BY_4_0						http://grbio.org/institution/museum-national-dhistoire-naturelle			MNHN	P			PRESERVED_SPECIMEN				http://coldb.mnhn.fr/catalognumber/mnhn/p/p04667665	P04667665															PRESENT	hb
694845933				CC_BY_4_0						http://grbio.org/institution/museum-national-dhistoire-naturelle			MNHN	P			PRESERVED_SPECIMEN				http://coldb.mnhn.fr/catalognumber/mnhn/p/p04667661	P04667661															PRESENT	hb
694845748				CC_BY_4_0						http://grbio.org/institution/museum-national-dhistoire-naturelle			MNHN	P			PRESERVED_SPECIMEN				http://coldb.mnhn.fr/catalognumber/mnhn/p/p04667581	P04667581															PRESENT	hb
694845747				CC_BY_4_0						http://grbio.org/institution/museum-national-dhistoire-naturelle			MNHN	P			PRESERVED_SPECIMEN				http://coldb.mnhn.fr/catalognumber/mnhn/p/p04667571	P04667571															PRESENT	hb
694845746				CC_BY_4_0						http://grbio.org/institution/museum-national-dhistoire-naturelle			MNHN	P			PRESERVED_SPECIMEN				http://coldb.mnhn.fr/catalognumber/mnhn/p/p04667567	P04667567															PRESENT	hb
694845745				CC_BY_4_0						http://grbio.org/institution/museum-national-dhistoire-naturelle			MNHN	P			PRESERVED_SPECIMEN				http://coldb.mnhn.fr/catalognumber/mnhn/p/p04667565	P04667565															PRESENT	hb
694845744				CC_BY_4_0						http://grbio.org/institution/museum-national-dhistoire-naturelle			MNHN	P			PRESERVED_SPECIMEN				http://coldb.mnhn.fr/catalognumber/mnhn/p/p04667526	P04667526															PRESENT	hb
694845660				CC_BY_4_0						http://grbio.org/institution/museum-national-dhistoire-naturelle			MNHN	P			PRESERVED_SPECIMEN				http://coldb.mnhn.fr/catalognumber/mnhn/p/p04667649	P04667649															PRESENT	hb
694845659				CC_BY_4_0						http://grbio.org/institution/museum-national-dhistoire-naturelle			MNHN	P			PRESERVED_SPECIMEN				http://coldb.mnhn.fr/catalognumber/mnhn/p/p04667643	P04667643															PRESENT	hb
694845658				CC_BY_4_0						http://grbio.org/institution/museum-national-dhistoire-naturelle			MNHN	P			PRESERVED_SPECIMEN				http://coldb.mnhn.fr/catalognumber/mnhn/p/p04667599	P04667599															PRESENT	hb
694845657				CC_BY_4_0						http://grbio.org/institution/museum-national-dhistoire-naturelle			MNHN	P			PRESERVED_SPECIMEN				http://coldb.mnhn.fr/catalognumber/mnhn/p/p04667598	P04667598															PRESENT	hb
694845656				CC_BY_4_0						http://grbio.org/institution/museum-national-dhistoire-naturelle			MNHN	P			PRESERVED_SPECIMEN				http://coldb.mnhn.fr/catalognumber/mnhn/p/p04667596	P04667596															PRESENT	hb
694845655				CC_BY_4_0						http://grbio.org/institution/museum-national-dhistoire-naturelle			MNHN	P			PRESERVED_SPECIMEN				http://coldb.mnhn.fr/catalognumber/mnhn/p/p04667591	P04667591															PRESENT	hb
694845654				CC_BY_4_0						http://grbio.org/institution/museum-national-dhistoire-naturelle			MNHN	P			PRESERVED_SPECIMEN				http://coldb.mnhn.fr/catalognumber/mnhn/p/p04667587	P04667587															PRESENT	hb
694845303				CC_BY_4_0						http://grbio.org/institution/museum-national-dhistoire-naturelle			MNHN	P			PRESERVED_SPECIMEN				http://coldb.mnhn.fr/catalognumber/mnhn/p/p04667307	P04667307															PRESENT	hb
694845200				CC_BY_4_0						http://grbio.org/institution/museum-national-dhistoire-naturelle			MNHN	P			PRESERVED_SPECIMEN				http://coldb.mnhn.fr/catalognumber/mnhn/p/p04667366	P04667366															PRESENT	hb
694845199				CC_BY_4_0						http://grbio.org/institution/museum-national-dhistoire-naturelle			MNHN	P			PRESERVED_SPECIMEN				http://coldb.mnhn.fr/catalognumber/mnhn/p/p04667365	P04667365															PRESENT	hb
694845198				CC_BY_4_0						http://grbio.org/institution/museum-national-dhistoire-naturelle			MNHN	P			PRESERVED_SPECIMEN				http://coldb.mnhn.fr/catalognumber/mnhn/p/p04667360	P04667360															PRESENT	hb
694845197				CC_BY_4_0						http://grbio.org/institution/museum-national-dhistoire-naturelle			MNHN	P			PRESERVED_SPECIMEN				http://coldb.mnhn.fr/catalognumber/mnhn/p/p04667342	P04667342															PRESENT	hb
694845196				CC_BY_4_0						http://grbio.org/institution/museum-national-dhistoire-naturelle			MNHN	P			PRESERVED_SPECIMEN				http://coldb.mnhn.fr/catalognumber/mnhn/p/p04667334	P04667334															PRESENT	hb
694845195				CC_BY_4_0						http://grbio.org/institution/museum-national-dhistoire-naturelle			MNHN	P			PRESERVED_SPECIMEN				http://coldb.mnhn.fr/catalognumber/mnhn/p/p04667327	P04667327															PRESENT	hb
694845194				CC_BY_4_0						http://grbio.org/institution/museum-national-dhistoire-naturelle			MNHN	P			PRESERVED_SPECIMEN				http://coldb.mnhn.fr/catalognumber/mnhn/p/p04667320	P04667320															PRESENT	hb
694845193				CC_BY_4_0						http://grbio.org/institution/museum-national-dhistoire-naturelle			MNHN	P			PRESERVED_SPECIMEN				http://coldb.mnhn.fr/catalognumber/mnhn/p/p04667315	P04667315															PRESENT	hb
694845192				CC_BY_4_0						http://grbio.org/institution/museum-national-dhistoire-naturelle			MNHN	P			PRESERVED_SPECIMEN				http://coldb.mnhn.fr/catalognumber/mnhn/p/p04667311	P04667311															PRESENT	hb
694844988				CC_BY_4_0						http://grbio.org/institution/museum-national-dhistoire-naturelle			MNHN	P			PRESERVED_SPECIMEN				http://coldb.mnhn.fr/catalognumber/mnhn/p/p04667299	P04667299															PRESENT	hb
694844987				CC_BY_4_0						http://grbio.org/institution/museum-national-dhistoire-naturelle			MNHN	P			PRESERVED_SPECIMEN				http://coldb.mnhn.fr/catalognumber/mnhn/p/p04667291	P04667291															PRESENT	hb
694844986				CC_BY_4_0						http://grbio.org/institution/museum-national-dhistoire-naturelle			MNHN	P			PRESERVED_SPECIMEN				http://coldb.mnhn.fr/catalognumber/mnhn/p/p04667279	P04667279															PRESENT	hb
694844631				CC_BY_4_0						http://grbio.org/institution/museum-national-dhistoire-naturelle			MNHN	P			PRESERVED_SPECIMEN				http://coldb.mnhn.fr/catalognumber/mnhn/p/p05154070	P05154070															PRESENT	hb
694844630				CC_BY_4_0						http://grbio.org/institution/museum-national-dhistoire-naturelle			MNHN	P			PRESERVED_SPECIMEN				http://coldb.mnhn.fr/catalognumber/mnhn/p/p05154069	P05154069															PRESENT	hb
694844629				CC_BY_4_0						http://grbio.org/institution/museum-national-dhistoire-naturelle			MNHN	P			PRESERVED_SPECIMEN				http://coldb.mnhn.fr/catalognumber/mnhn/p/p05154067	P05154067															PRESENT	hb
694844628				CC_BY_4_0						http://grbio.org/institution/museum-national-dhistoire-naturelle			MNHN	P			PRESERVED_SPECIMEN				http://coldb.mnhn.fr/catalognumber/mnhn/p/p05154063	P05154063															PRESENT	hb
694844577				CC_BY_4_0						http://grbio.org/institution/museum-national-dhistoire-naturelle			MNHN	P			PRESERVED_SPECIMEN				http://coldb.mnhn.fr/catalognumber/mnhn/p/p05154135	P05154135															PRESENT	hb
694844555				CC_BY_4_0						http://grbio.org/institution/museum-national-dhistoire-naturelle			MNHN	P			PRESERVED_SPECIMEN				http://coldb.mnhn.fr/catalognumber/mnhn/p/p05154128	P05154128															PRESENT	hb
694844554				CC_BY_4_0						http://grbio.org/institution/museum-national-dhistoire-naturelle			MNHN	P			PRESERVED_SPECIMEN				http://coldb.mnhn.fr/catalognumber/mnhn/p/p05154127	P05154127															PRESENT	hb
694844553				CC_BY_4_0						http://grbio.org/institution/museum-national-dhistoire-naturelle			MNHN	P			PRESERVED_SPECIMEN				http://coldb.mnhn.fr/catalognumber/mnhn/p/p05154122	P05154122															PRESENT	hb
694844552				CC_BY_4_0						http://grbio.org/institution/museum-national-dhistoire-naturelle			MNHN	P			PRESERVED_SPECIMEN				http://coldb.mnhn.fr/catalognumber/mnhn/p/p05154121	P05154121															PRESENT	hb
694844551				CC_BY_4_0						http://grbio.org/institution/museum-national-dhistoire-naturelle			MNHN	P			PRESERVED_SPECIMEN				http://coldb.mnhn.fr/catalognumber/mnhn/p/p05154118	P05154118															PRESENT	hb
694844550				CC_BY_4_0						http://grbio.org/institution/museum-national-dhistoire-naturelle			MNHN	P			PRESERVED_SPECIMEN				http://coldb.mnhn.fr/catalognumber/mnhn/p/p05154114	P05154114															PRESENT	hb
694844549				CC_BY_4_0						http://grbio.org/institution/museum-national-dhistoire-naturelle			MNHN	P			PRESERVED_SPECIMEN				http://coldb.mnhn.fr/catalognumber/mnhn/p/p05154104	P05154104															PRESENT	hb
694844548				CC_BY_4_0						http://grbio.org/institution/museum-national-dhistoire-naturelle			MNHN	P			PRESERVED_SPECIMEN				http://coldb.mnhn.fr/catalognumber/mnhn/p/p05154092	P05154092															PRESENT	hb
694844547				CC_BY_4_0						http://grbio.org/institution/museum-national-dhistoire-naturelle			MNHN	P			PRESERVED_SPECIMEN				http://coldb.mnhn.fr/catalognumber/mnhn/p/p05154091	P05154091															PRESENT	hb
694844546				CC_BY_4_0						http://grbio.org/institution/museum-national-dhistoire-naturelle			MNHN	P			PRESERVED_SPECIMEN				http://coldb.mnhn.fr/catalognumber/mnhn/p/p05154089	P05154089															PRESENT	hb
694844545				CC_BY_4_0						http://grbio.org/institution/museum-national-dhistoire-naturelle			MNHN	P			PRESERVED_SPECIMEN				http://coldb.mnhn.fr/catalognumber/mnhn/p/p05153623	P05153623															PRESENT	hb
694844544				CC_BY_4_0						http://grbio.org/institution/museum-national-dhistoire-naturelle			MNHN	P			PRESERVED_SPECIMEN				http://coldb.mnhn.fr/catalognumber/mnhn/p/p05153605	P05153605															PRESENT	hb
694844543				CC_BY_4_0						http://grbio.org/institution/museum-national-dhistoire-naturelle			MNHN	P			PRESERVED_SPECIMEN				http://coldb.mnhn.fr/catalognumber/mnhn/p/p05153597	P05153597															PRESENT	hb
694844542				CC_BY_4_0						http://grbio.org/institution/museum-national-dhistoire-naturelle			MNHN	P			PRESERVED_SPECIMEN				http://coldb.mnhn.fr/catalognumber/mnhn/p/p05153591	P05153591															PRESENT	hb
694844519				CC_BY_4_0						http://grbio.org/institution/museum-national-dhistoire-naturelle			MNHN	P			PRESERVED_SPECIMEN				http://coldb.mnhn.fr/catalognumber/mnhn/p/p05153579	P05153579															PRESENT	hb
694844518				CC_BY_4_0						http://grbio.org/institution/museum-national-dhistoire-naturelle			MNHN	P			PRESERVED_SPECIMEN				http://coldb.mnhn.fr/catalognumber/mnhn/p/p05153577	P05153577															PRESENT	hb
694844490				CC_BY_4_0						http://grbio.org/institution/museum-national-dhistoire-naturelle			MNHN	P			PRESERVED_SPECIMEN				http://coldb.mnhn.fr/catalognumber/mnhn/p/p05153735	P05153735															PRESENT	hb
694844417				CC_BY_4_0						http://grbio.org/institution/museum-national-dhistoire-naturelle			MNHN	P			PRESERVED_SPECIMEN				http://coldb.mnhn.fr/catalognumber/mnhn/p/p05153699	P05153699															PRESENT	hb
694844416				CC_BY_4_0						http://grbio.org/institution/museum-national-dhistoire-naturelle			MNHN	P			PRESERVED_SPECIMEN				http://coldb.mnhn.fr/catalognumber/mnhn/p/p05153692	P05153692															PRESENT	hb
694844401				CC_BY_4_0						http://grbio.org/institution/museum-national-dhistoire-naturelle			MNHN	P			PRESERVED_SPECIMEN				http://coldb.mnhn.fr/catalognumber/mnhn/p/p05153674	P05153674															PRESENT	hb
694844400				CC_BY_4_0						http://grbio.org/institution/museum-national-dhistoire-naturelle			MNHN	P			PRESERVED_SPECIMEN				http://coldb.mnhn.fr/catalognumber/mnhn/p/p05153668	P05153668															PRESENT	hb
694844399				CC_BY_4_0						http://grbio.org/institution/museum-national-dhistoire-naturelle			MNHN	P			PRESERVED_SPECIMEN				http://coldb.mnhn.fr/catalognumber/mnhn/p/p05153665	P05153665															PRESENT	hb
694844398				CC_BY_4_0						http://grbio.org/institution/museum-national-dhistoire-naturelle			MNHN	P			PRESERVED_SPECIMEN				http://coldb.mnhn.fr/catalognumber/mnhn/p/p05153661	P05153661															PRESENT	hb
694844397				CC_BY_4_0						http://grbio.org/institution/museum-national-dhistoire-naturelle			MNHN	P			PRESERVED_SPECIMEN				http://coldb.mnhn.fr/catalognumber/mnhn/p/p05153655	P05153655															PRESENT	hb
694844396				CC_BY_4_0						http://grbio.org/institution/museum-national-dhistoire-naturelle			MNHN	P			PRESERVED_SPECIMEN				http://coldb.mnhn.fr/catalognumber/mnhn/p/p05153638	P05153638															PRESENT	hb
694844330				CC_BY_4_0						http://grbio.org/institution/museum-national-dhistoire-naturelle			MNHN	P			PRESERVED_SPECIMEN				http://coldb.mnhn.fr/catalognumber/mnhn/p/p05153752	P05153752															PRESENT	hb
694844329				CC_BY_4_0						http://grbio.org/institution/museum-national-dhistoire-naturelle			MNHN	P			PRESERVED_SPECIMEN				http://coldb.mnhn.fr/catalognumber/mnhn/p/p05153732	P05153732															PRESENT	hb
694844328				CC_BY_4_0						http://grbio.org/institution/museum-national-dhistoire-naturelle			MNHN	P			PRESERVED_SPECIMEN				http://coldb.mnhn.fr/catalognumber/mnhn/p/p05153707	P05153707															PRESENT	hb
694844327				CC_BY_4_0						http://grbio.org/institution/museum-national-dhistoire-naturelle			MNHN	P			PRESERVED_SPECIMEN				http://coldb.mnhn.fr/catalognumber/mnhn/p/p05153705	P05153705															PRESENT	hb
694844326				CC_BY_4_0						http://grbio.org/institution/museum-national-dhistoire-naturelle			MNHN	P			PRESERVED_SPECIMEN				http://coldb.mnhn.fr/catalognumber/mnhn/p/p05153703	P05153703															PRESENT	hb
694835978				CC_BY_4_0						http://grbio.org/institution/museum-national-dhistoire-naturelle			MNHN	P			PRESERVED_SPECIMEN				http://coldb.mnhn.fr/catalognumber/mnhn/p/p04667703	P04667703															PRESENT	hb
694835977				CC_BY_4_0						http://grbio.org/institution/museum-national-dhistoire-naturelle			MNHN	P			PRESERVED_SPECIMEN				http://coldb.mnhn.fr/catalognumber/mnhn/p/p04667688	P04667688															PRESENT	hb
694835976				CC_BY_4_0						http://grbio.org/institution/museum-national-dhistoire-naturelle			MNHN	P			PRESERVED_SPECIMEN				http://coldb.mnhn.fr/catalognumber/mnhn/p/p04667671	P04667671															PRESENT	hb
694835975				CC_BY_4_0						http://grbio.org/institution/museum-national-dhistoire-naturelle			MNHN	P			PRESERVED_SPECIMEN				http://coldb.mnhn.fr/catalognumber/mnhn/p/p04667667	P04667667															PRESENT	hb
694835974				CC_BY_4_0						http://grbio.org/institution/museum-national-dhistoire-naturelle			MNHN	P			PRESERVED_SPECIMEN				http://coldb.mnhn.fr/catalognumber/mnhn/p/p04667656	P04667656															PRESENT	hb
694835973				CC_BY_4_0						http://grbio.org/institution/museum-national-dhistoire-naturelle			MNHN	P			PRESERVED_SPECIMEN				http://coldb.mnhn.fr/catalognumber/mnhn/p/p04667655	P04667655															PRESENT	hb
694835793				CC_BY_4_0						http://grbio.org/institution/museum-national-dhistoire-naturelle			MNHN	P			PRESERVED_SPECIMEN				http://coldb.mnhn.fr/catalognumber/mnhn/p/p04667576	P04667576															PRESENT	hb
694835792				CC_BY_4_0						http://grbio.org/institution/museum-national-dhistoire-naturelle			MNHN	P			PRESERVED_SPECIMEN				http://coldb.mnhn.fr/catalognumber/mnhn/p/p04667572	P04667572															PRESENT	hb
694835791				CC_BY_4_0						http://grbio.org/institution/museum-national-dhistoire-naturelle			MNHN	P			PRESERVED_SPECIMEN				http://coldb.mnhn.fr/catalognumber/mnhn/p/p04667568	P04667568															PRESENT	hb
694835763				CC_BY_4_0						http://grbio.org/institution/museum-national-dhistoire-naturelle			MNHN	P			PRESERVED_SPECIMEN				http://coldb.mnhn.fr/catalognumber/mnhn/p/p04667523	P04667523															PRESENT	hb
694835704				CC_BY_4_0						http://grbio.org/institution/museum-national-dhistoire-naturelle			MNHN	P			PRESERVED_SPECIMEN				http://coldb.mnhn.fr/catalognumber/mnhn/p/p04667646	P04667646															PRESENT	hb
694835703				CC_BY_4_0						http://grbio.org/institution/museum-national-dhistoire-naturelle			MNHN	P			PRESERVED_SPECIMEN				http://coldb.mnhn.fr/catalognumber/mnhn/p/p04667585	P04667585															PRESENT	hb
694835702				CC_BY_4_0						http://grbio.org/institution/museum-national-dhistoire-naturelle			MNHN	P			PRESERVED_SPECIMEN				http://coldb.mnhn.fr/catalognumber/mnhn/p/p04667584	P04667584															PRESENT	hb
694835353				CC_BY_4_0						http://grbio.org/institution/museum-national-dhistoire-naturelle			MNHN	P			PRESERVED_SPECIMEN				http://coldb.mnhn.fr/catalognumber/mnhn/p/p04667306	P04667306															PRESENT	hb
694835253				CC_BY_4_0						http://grbio.org/institution/museum-national-dhistoire-naturelle			MNHN	P			PRESERVED_SPECIMEN				http://coldb.mnhn.fr/catalognumber/mnhn/p/p04667375	P04667375															PRESENT	hb
694835252				CC_BY_4_0						http://grbio.org/institution/museum-national-dhistoire-naturelle			MNHN	P			PRESERVED_SPECIMEN				http://coldb.mnhn.fr/catalognumber/mnhn/p/p04667368	P04667368															PRESENT	hb
694835251				CC_BY_4_0						http://grbio.org/institution/museum-national-dhistoire-naturelle			MNHN	P			PRESERVED_SPECIMEN				http://coldb.mnhn.fr/catalognumber/mnhn/p/p04667362	P04667362															PRESENT	hb
694835250				CC_BY_4_0						http://grbio.org/institution/museum-national-dhistoire-naturelle			MNHN	P			PRESERVED_SPECIMEN				http://coldb.mnhn.fr/catalognumber/mnhn/p/p04667333	P04667333															PRESENT	hb
694835249				CC_BY_4_0						http://grbio.org/institution/museum-national-dhistoire-naturelle			MNHN	P			PRESERVED_SPECIMEN				http://coldb.mnhn.fr/catalognumber/mnhn/p/p04667316	P04667316															PRESENT	hb
694835063				CC_BY_4_0						http://grbio.org/institution/museum-national-dhistoire-naturelle			MNHN	P			PRESERVED_SPECIMEN				http://coldb.mnhn.fr/catalognumber/mnhn/p/p04667301	P04667301															PRESENT	hb
694835062				CC_BY_4_0						http://grbio.org/institution/museum-national-dhistoire-naturelle			MNHN	P			PRESERVED_SPECIMEN				http://coldb.mnhn.fr/catalognumber/mnhn/p/p04667284	P04667284															PRESENT	hb
694835061				CC_BY_4_0						http://grbio.org/institution/museum-national-dhistoire-naturelle			MNHN	P			PRESERVED_SPECIMEN				http://coldb.mnhn.fr/catalognumber/mnhn/p/p04667278	P04667278															PRESENT	hb
694835025				CC_BY_4_0						http://grbio.org/institution/museum-national-dhistoire-naturelle			MNHN	P			PRESERVED_SPECIMEN				http://coldb.mnhn.fr/catalognumber/mnhn/p/p04667275	P04667275															PRESENT	hb
694834702				CC_BY_4_0						http://grbio.org/institution/museum-national-dhistoire-naturelle			MNHN	P			PRESERVED_SPECIMEN				http://coldb.mnhn.fr/catalognumber/mnhn/p/p05154086	P05154086															PRESENT	hb
694834672				CC_BY_4_0						http://grbio.org/institution/museum-national-dhistoire-naturelle			MNHN	P			PRESERVED_SPECIMEN				http://coldb.mnhn.fr/catalognumber/mnhn/p/p05154058	P05154058															PRESENT	hb
694834614				CC_BY_4_0						http://grbio.org/institution/museum-national-dhistoire-naturelle			MNHN	P			PRESERVED_SPECIMEN				http://coldb.mnhn.fr/catalognumber/mnhn/p/p05154152	P05154152															PRESENT	hb
694834613				CC_BY_4_0						http://grbio.org/institution/museum-national-dhistoire-naturelle			MNHN	P			PRESERVED_SPECIMEN				http://coldb.mnhn.fr/catalognumber/mnhn/p/p05154145	P05154145															PRESENT	hb
694834594				CC_BY_4_0						http://grbio.org/institution/museum-national-dhistoire-naturelle			MNHN	P			PRESERVED_SPECIMEN				http://coldb.mnhn.fr/catalognumber/mnhn/p/p05154130	P05154130															PRESENT	hb
694834593				CC_BY_4_0						http://grbio.org/institution/museum-national-dhistoire-naturelle			MNHN	P			PRESERVED_SPECIMEN				http://coldb.mnhn.fr/catalognumber/mnhn/p/p05154112	P05154112															PRESENT	hb
694834592				CC_BY_4_0						http://grbio.org/institution/museum-national-dhistoire-naturelle			MNHN	P			PRESERVED_SPECIMEN				http://coldb.mnhn.fr/catalognumber/mnhn/p/p05154105	P05154105															PRESENT	hb
694834591				CC_BY_4_0						http://grbio.org/institution/museum-national-dhistoire-naturelle			MNHN	P			PRESERVED_SPECIMEN				http://coldb.mnhn.fr/catalognumber/mnhn/p/p05154096	P05154096															PRESENT	hb
694834590				CC_BY_4_0						http://grbio.org/institution/museum-national-dhistoire-naturelle			MNHN	P			PRESERVED_SPECIMEN				http://coldb.mnhn.fr/catalognumber/mnhn/p/p05153632	P05153632															PRESENT	hb
694834589				CC_BY_4_0						http://grbio.org/institution/museum-national-dhistoire-naturelle			MNHN	P			PRESERVED_SPECIMEN				http://coldb.mnhn.fr/catalognumber/mnhn/p/p05153628	P05153628															PRESENT	hb
694834588				CC_BY_4_0						http://grbio.org/institution/museum-national-dhistoire-naturelle			MNHN	P			PRESERVED_SPECIMEN				http://coldb.mnhn.fr/catalognumber/mnhn/p/p05153624	P05153624															PRESENT	hb
694834587				CC_BY_4_0						http://grbio.org/institution/museum-national-dhistoire-naturelle			MNHN	P			PRESERVED_SPECIMEN				http://coldb.mnhn.fr/catalognumber/mnhn/p/p05153621	P05153621															PRESENT	hb
694834586				CC_BY_4_0						http://grbio.org/institution/museum-national-dhistoire-naturelle			MNHN	P			PRESERVED_SPECIMEN				http://coldb.mnhn.fr/catalognumber/mnhn/p/p05153618	P05153618															PRESENT	hb
694834585				CC_BY_4_0						http://grbio.org/institution/museum-national-dhistoire-naturelle			MNHN	P			PRESERVED_SPECIMEN				http://coldb.mnhn.fr/catalognumber/mnhn/p/p05153611	P05153611															PRESENT	hb
694834584				CC_BY_4_0						http://grbio.org/institution/museum-national-dhistoire-naturelle			MNHN	P			PRESERVED_SPECIMEN				http://coldb.mnhn.fr/catalognumber/mnhn/p/p05153603	P05153603															PRESENT	hb
694834564				CC_BY_4_0						http://grbio.org/institution/museum-national-dhistoire-naturelle			MNHN	P			PRESERVED_SPECIMEN				http://coldb.mnhn.fr/catalognumber/mnhn/p/p05153582	P05153582															PRESENT	hb
694834563				CC_BY_4_0						http://grbio.org/institution/museum-national-dhistoire-naturelle			MNHN	P			PRESERVED_SPECIMEN				http://coldb.mnhn.fr/catalognumber/mnhn/p/p05153576	P05153576															PRESENT	hb
694834537				CC_BY_4_0						http://grbio.org/institution/museum-national-dhistoire-naturelle			MNHN	P			PRESERVED_SPECIMEN				http://coldb.mnhn.fr/catalognumber/mnhn/p/p05153753	P05153753															PRESENT	hb
694834536				CC_BY_4_0						http://grbio.org/institution/museum-national-dhistoire-naturelle			MNHN	P			PRESERVED_SPECIMEN				http://coldb.mnhn.fr/catalognumber/mnhn/p/p05153746	P05153746															PRESENT	hb
694834535				CC_BY_4_0						http://grbio.org/institution/museum-national-dhistoire-naturelle			MNHN	P			PRESERVED_SPECIMEN				http://coldb.mnhn.fr/catalognumber/mnhn/p/p05153734	P05153734															PRESENT	hb
694834489				CC_BY_4_0						http://grbio.org/institution/museum-national-dhistoire-naturelle			MNHN	P			PRESERVED_SPECIMEN				http://coldb.mnhn.fr/catalognumber/mnhn/p/p05155143	P05155143															PRESENT	hb
694834469				CC_BY_4_0						http://grbio.org/institution/museum-national-dhistoire-naturelle			MNHN	P			PRESERVED_SPECIMEN				http://coldb.mnhn.fr/catalognumber/mnhn/p/p05154155	P05154155															PRESENT	hb
694834468				CC_BY_4_0						http://grbio.org/institution/museum-national-dhistoire-naturelle			MNHN	P			PRESERVED_SPECIMEN				http://coldb.mnhn.fr/catalognumber/mnhn/p/p05153698	P05153698															PRESENT	hb
694834467				CC_BY_4_0						http://grbio.org/institution/museum-national-dhistoire-naturelle			MNHN	P			PRESERVED_SPECIMEN				http://coldb.mnhn.fr/catalognumber/mnhn/p/p05153695	P05153695															PRESENT	hb
694834466				CC_BY_4_0						http://grbio.org/institution/museum-national-dhistoire-naturelle			MNHN	P			PRESERVED_SPECIMEN				http://coldb.mnhn.fr/catalognumber/mnhn/p/p05153693	P05153693															PRESENT	hb
694834465				CC_BY_4_0						http://grbio.org/institution/museum-national-dhistoire-naturelle			MNHN	P			PRESERVED_SPECIMEN				http://coldb.mnhn.fr/catalognumber/mnhn/p/p05153690	P05153690															PRESENT	hb
694834443				CC_BY_4_0						http://grbio.org/institution/museum-national-dhistoire-naturelle			MNHN	P			PRESERVED_SPECIMEN				http://coldb.mnhn.fr/catalognumber/mnhn/p/p05153684	P05153684															PRESENT	hb
694834442				CC_BY_4_0						http://grbio.org/institution/museum-national-dhistoire-naturelle			MNHN	P			PRESERVED_SPECIMEN				http://coldb.mnhn.fr/catalognumber/mnhn/p/p05153667	P05153667															PRESENT	hb
694834441				CC_BY_4_0						http://grbio.org/institution/museum-national-dhistoire-naturelle			MNHN	P			PRESERVED_SPECIMEN				http://coldb.mnhn.fr/catalognumber/mnhn/p/p05153663	P05153663															PRESENT	hb
694834440				CC_BY_4_0						http://grbio.org/institution/museum-national-dhistoire-naturelle			MNHN	P			PRESERVED_SPECIMEN				http://coldb.mnhn.fr/catalognumber/mnhn/p/p05153656	P05153656															PRESENT	hb
694834439				CC_BY_4_0						http://grbio.org/institution/museum-national-dhistoire-naturelle			MNHN	P			PRESERVED_SPECIMEN				http://coldb.mnhn.fr/catalognumber/mnhn/p/p05153650	P05153650															PRESENT	hb
694834438				CC_BY_4_0						http://grbio.org/institution/museum-national-dhistoire-naturelle			MNHN	P			PRESERVED_SPECIMEN				http://coldb.mnhn.fr/catalognumber/mnhn/p/p05153644	P05153644															PRESENT	hb
694834357				CC_BY_4_0						http://grbio.org/institution/museum-national-dhistoire-naturelle			MNHN	P			PRESERVED_SPECIMEN				http://coldb.mnhn.fr/catalognumber/mnhn/p/p05153748	P05153748															PRESENT	hb
694834356				CC_BY_4_0						http://grbio.org/institution/museum-national-dhistoire-naturelle			MNHN	P			PRESERVED_SPECIMEN				http://coldb.mnhn.fr/catalognumber/mnhn/p/p05153747	P05153747															PRESENT	hb
694834355				CC_BY_4_0						http://grbio.org/institution/museum-national-dhistoire-naturelle			MNHN	P			PRESERVED_SPECIMEN				http://coldb.mnhn.fr/catalognumber/mnhn/p/p05153743	P05153743															PRESENT	hb
694834354				CC_BY_4_0						http://grbio.org/institution/museum-national-dhistoire-naturelle			MNHN	P			PRESERVED_SPECIMEN				http://coldb.mnhn.fr/catalognumber/mnhn/p/p05153729	P05153729															PRESENT	hb
694834353				CC_BY_4_0						http://grbio.org/institution/museum-national-dhistoire-naturelle			MNHN	P			PRESERVED_SPECIMEN				http://coldb.mnhn.fr/catalognumber/mnhn/p/p05153725	P05153725															PRESENT	hb
694834352				CC_BY_4_0						http://grbio.org/institution/museum-national-dhistoire-naturelle			MNHN	P			PRESERVED_SPECIMEN				http://coldb.mnhn.fr/catalognumber/mnhn/p/p05153706	P05153706															PRESENT	hb
694824933				CC_BY_4_0						http://grbio.org/institution/museum-national-dhistoire-naturelle			MNHN	P			PRESERVED_SPECIMEN				http://coldb.mnhn.fr/catalognumber/mnhn/p/p04667304	P04667304															PRESENT	hb
694824932				CC_BY_4_0						http://grbio.org/institution/museum-national-dhistoire-naturelle			MNHN	P			PRESERVED_SPECIMEN				http://coldb.mnhn.fr/catalognumber/mnhn/p/p04667303	P04667303															PRESENT	hb
694824931				CC_BY_4_0						http://grbio.org/institution/museum-national-dhistoire-naturelle			MNHN	P			PRESERVED_SPECIMEN				http://coldb.mnhn.fr/catalognumber/mnhn/p/p04667300	P04667300															PRESENT	hb
694824930				CC_BY_4_0						http://grbio.org/institution/museum-national-dhistoire-naturelle			MNHN	P			PRESERVED_SPECIMEN				http://coldb.mnhn.fr/catalognumber/mnhn/p/p04667294	P04667294															PRESENT	hb
694824929				CC_BY_4_0						http://grbio.org/institution/museum-national-dhistoire-naturelle			MNHN	P			PRESERVED_SPECIMEN				http://coldb.mnhn.fr/catalognumber/mnhn/p/p04667293	P04667293															PRESENT	hb
694824928				CC_BY_4_0						http://grbio.org/institution/museum-national-dhistoire-naturelle			MNHN	P			PRESERVED_SPECIMEN				http://coldb.mnhn.fr/catalognumber/mnhn/p/p04667292	P04667292															PRESENT	hb
694824927				CC_BY_4_0						http://grbio.org/institution/museum-national-dhistoire-naturelle			MNHN	P			PRESERVED_SPECIMEN				http://coldb.mnhn.fr/catalognumber/mnhn/p/p04667290	P04667290															PRESENT	hb
694824926				CC_BY_4_0						http://grbio.org/institution/museum-national-dhistoire-naturelle			MNHN	P			PRESERVED_SPECIMEN				http://coldb.mnhn.fr/catalognumber/mnhn/p/p04667289	P04667289															PRESENT	hb
694824925				CC_BY_4_0						http://grbio.org/institution/museum-national-dhistoire-naturelle			MNHN	P			PRESERVED_SPECIMEN				http://coldb.mnhn.fr/catalognumber/mnhn/p/p04667288	P04667288															PRESENT	hb
694824924				CC_BY_4_0						http://grbio.org/institution/museum-national-dhistoire-naturelle			MNHN	P			PRESERVED_SPECIMEN				http://coldb.mnhn.fr/catalognumber/mnhn/p/p04667287	P04667287															PRESENT	hb
694824923				CC_BY_4_0						http://grbio.org/institution/museum-national-dhistoire-naturelle			MNHN	P			PRESERVED_SPECIMEN				http://coldb.mnhn.fr/catalognumber/mnhn/p/p04667286	P04667286															PRESENT	hb
694824922				CC_BY_4_0						http://grbio.org/institution/museum-national-dhistoire-naturelle			MNHN	P			PRESERVED_SPECIMEN				http://coldb.mnhn.fr/catalognumber/mnhn/p/p04667285	P04667285															PRESENT	hb
694824921				CC_BY_4_0						http://grbio.org/institution/museum-national-dhistoire-naturelle			MNHN	P			PRESERVED_SPECIMEN				http://coldb.mnhn.fr/catalognumber/mnhn/p/p04667283	P04667283															PRESENT	hb
694824920				CC_BY_4_0						http://grbio.org/institution/museum-national-dhistoire-naturelle			MNHN	P			PRESERVED_SPECIMEN				http://coldb.mnhn.fr/catalognumber/mnhn/p/p04667282	P04667282															PRESENT	hb
694824919				CC_BY_4_0						http://grbio.org/institution/museum-national-dhistoire-naturelle			MNHN	P			PRESERVED_SPECIMEN				http://coldb.mnhn.fr/catalognumber/mnhn/p/p04667281	P04667281															PRESENT	hb
694824918				CC_BY_4_0						http://grbio.org/institution/museum-national-dhistoire-naturelle			MNHN	P			PRESERVED_SPECIMEN				http://coldb.mnhn.fr/catalognumber/mnhn/p/p04667280	P04667280															PRESENT	hb
694824917				CC_BY_4_0						http://grbio.org/institution/museum-national-dhistoire-naturelle			MNHN	P			PRESERVED_SPECIMEN				http://coldb.mnhn.fr/catalognumber/mnhn/p/p04667277	P04667277															PRESENT	hb
694824916				CC_BY_4_0						http://grbio.org/institution/museum-national-dhistoire-naturelle			MNHN	P			PRESERVED_SPECIMEN				http://coldb.mnhn.fr/catalognumber/mnhn/p/p04667276	P04667276															PRESENT	hb
694824915				CC_BY_4_0						http://grbio.org/institution/museum-national-dhistoire-naturelle			MNHN	P			PRESERVED_SPECIMEN				http://coldb.mnhn.fr/catalognumber/mnhn/p/p04667274	P04667274															PRESENT	hb
694824914				CC_BY_4_0						http://grbio.org/institution/museum-national-dhistoire-naturelle			MNHN	P			PRESERVED_SPECIMEN				http://coldb.mnhn.fr/catalognumber/mnhn/p/p04667273	P04667273															PRESENT	hb
694824913				CC_BY_4_0						http://grbio.org/institution/museum-national-dhistoire-naturelle			MNHN	P			PRESERVED_SPECIMEN				http://coldb.mnhn.fr/catalognumber/mnhn/p/p04667272	P04667272															PRESENT	hb
694824912				CC_BY_4_0						http://grbio.org/institution/museum-national-dhistoire-naturelle			MNHN	P			PRESERVED_SPECIMEN				http://coldb.mnhn.fr/catalognumber/mnhn/p/p04667271	P04667271															PRESENT	hb
694824911				CC_BY_4_0						http://grbio.org/institution/museum-national-dhistoire-naturelle			MNHN	P			PRESERVED_SPECIMEN				http://coldb.mnhn.fr/catalognumber/mnhn/p/p04667270	P04667270															PRESENT	hb
694813901				CC_BY_4_0						http://grbio.org/institution/museum-national-dhistoire-naturelle			MNHN	P			PRESERVED_SPECIMEN				http://coldb.mnhn.fr/catalognumber/mnhn/p/p05155139	P05155139															PRESENT	hb
694813900				CC_BY_4_0						http://grbio.org/institution/museum-national-dhistoire-naturelle			MNHN	P			PRESERVED_SPECIMEN				http://coldb.mnhn.fr/catalognumber/mnhn/p/p05155138	P05155138															PRESENT	hb
694812892				CC_BY_4_0						http://grbio.org/institution/museum-national-dhistoire-naturelle			MNHN	P			PRESERVED_SPECIMEN				http://coldb.mnhn.fr/catalognumber/mnhn/p/p05153751	P05153751															PRESENT	hb
694812891				CC_BY_4_0						http://grbio.org/institution/museum-national-dhistoire-naturelle			MNHN	P			PRESERVED_SPECIMEN				http://coldb.mnhn.fr/catalognumber/mnhn/p/p05153750	P05153750															PRESENT	hb
694812890				CC_BY_4_0						http://grbio.org/institution/museum-national-dhistoire-naturelle			MNHN	P			PRESERVED_SPECIMEN				http://coldb.mnhn.fr/catalognumber/mnhn/p/p05153738	P05153738															PRESENT	hb
694812889				CC_BY_4_0						http://grbio.org/institution/museum-national-dhistoire-naturelle			MNHN	P			PRESERVED_SPECIMEN				http://coldb.mnhn.fr/catalognumber/mnhn/p/p05153733	P05153733															PRESENT	hb
694812888				CC_BY_4_0						http://grbio.org/institution/museum-national-dhistoire-naturelle			MNHN	P			PRESERVED_SPECIMEN				http://coldb.mnhn.fr/catalognumber/mnhn/p/p05153730	P05153730															PRESENT	hb
694812887				CC_BY_4_0						http://grbio.org/institution/museum-national-dhistoire-naturelle			MNHN	P			PRESERVED_SPECIMEN				http://coldb.mnhn.fr/catalognumber/mnhn/p/p05153723	P05153723															PRESENT	hb
694812886				CC_BY_4_0						http://grbio.org/institution/museum-national-dhistoire-naturelle			MNHN	P			PRESERVED_SPECIMEN				http://coldb.mnhn.fr/catalognumber/mnhn/p/p05153718	P05153718															PRESENT	hb
694812885				CC_BY_4_0						http://grbio.org/institution/museum-national-dhistoire-naturelle			MNHN	P			PRESERVED_SPECIMEN				http://coldb.mnhn.fr/catalognumber/mnhn/p/p05153717	P05153717															PRESENT	hb
694812479				CC_BY_4_0						http://grbio.org/institution/museum-national-dhistoire-naturelle			MNHN	P			PRESERVED_SPECIMEN				http://coldb.mnhn.fr/catalognumber/mnhn/p/p05154087	P05154087															PRESENT	hb
694812478				CC_BY_4_0						http://grbio.org/institution/museum-national-dhistoire-naturelle			MNHN	P			PRESERVED_SPECIMEN				http://coldb.mnhn.fr/catalognumber/mnhn/p/p05154085	P05154085															PRESENT	hb
694812477				CC_BY_4_0						http://grbio.org/institution/museum-national-dhistoire-naturelle			MNHN	P			PRESERVED_SPECIMEN				http://coldb.mnhn.fr/catalognumber/mnhn/p/p05154084	P05154084															PRESENT	hb
694812476				CC_BY_4_0						http://grbio.org/institution/museum-national-dhistoire-naturelle			MNHN	P			PRESERVED_SPECIMEN				http://coldb.mnhn.fr/catalognumber/mnhn/p/p05154083	P05154083															PRESENT	hb
694812475				CC_BY_4_0						http://grbio.org/institution/museum-national-dhistoire-naturelle			MNHN	P			PRESERVED_SPECIMEN				http://coldb.mnhn.fr/catalognumber/mnhn/p/p05154082	P05154082															PRESENT	hb
694812474				CC_BY_4_0						http://grbio.org/institution/museum-national-dhistoire-naturelle			MNHN	P			PRESERVED_SPECIMEN				http://coldb.mnhn.fr/catalognumber/mnhn/p/p05154081	P05154081															PRESENT	hb
694812473				CC_BY_4_0						http://grbio.org/institution/museum-national-dhistoire-naturelle			MNHN	P			PRESERVED_SPECIMEN				http://coldb.mnhn.fr/catalognumber/mnhn/p/p05154080	P05154080															PRESENT	hb
694812472				CC_BY_4_0						http://grbio.org/institution/museum-national-dhistoire-naturelle			MNHN	P			PRESERVED_SPECIMEN				http://coldb.mnhn.fr/catalognumber/mnhn/p/p05154079	P05154079															PRESENT	hb
694812471				CC_BY_4_0						http://grbio.org/institution/museum-national-dhistoire-naturelle			MNHN	P			PRESERVED_SPECIMEN				http://coldb.mnhn.fr/catalognumber/mnhn/p/p05154078	P05154078															PRESENT	hb
694812470				CC_BY_4_0						http://grbio.org/institution/museum-national-dhistoire-naturelle			MNHN	P			PRESERVED_SPECIMEN				http://coldb.mnhn.fr/catalognumber/mnhn/p/p05154077	P05154077															PRESENT	hb
694812469				CC_BY_4_0						http://grbio.org/institution/museum-national-dhistoire-naturelle			MNHN	P			PRESERVED_SPECIMEN				http://coldb.mnhn.fr/catalognumber/mnhn/p/p05154076	P05154076															PRESENT	hb
694812468				CC_BY_4_0						http://grbio.org/institution/museum-national-dhistoire-naturelle			MNHN	P			PRESERVED_SPECIMEN				http://coldb.mnhn.fr/catalognumber/mnhn/p/p05154075	P05154075															PRESENT	hb
694812467				CC_BY_4_0						http://grbio.org/institution/museum-national-dhistoire-naturelle			MNHN	P			PRESERVED_SPECIMEN				http://coldb.mnhn.fr/catalognumber/mnhn/p/p05154074	P05154074															PRESENT	hb
694812466				CC_BY_4_0						http://grbio.org/institution/museum-national-dhistoire-naturelle			MNHN	P			PRESERVED_SPECIMEN				http://coldb.mnhn.fr/catalognumber/mnhn/p/p05154073	P05154073															PRESENT	hb
694812465				CC_BY_4_0						http://grbio.org/institution/museum-national-dhistoire-naturelle			MNHN	P			PRESERVED_SPECIMEN				http://coldb.mnhn.fr/catalognumber/mnhn/p/p05154072	P05154072															PRESENT	hb
694812464				CC_BY_4_0						http://grbio.org/institution/museum-national-dhistoire-naturelle			MNHN	P			PRESERVED_SPECIMEN				http://coldb.mnhn.fr/catalognumber/mnhn/p/p05154071	P05154071															PRESENT	hb
694812463				CC_BY_4_0						http://grbio.org/institution/museum-national-dhistoire-naturelle			MNHN	P			PRESERVED_SPECIMEN				http://coldb.mnhn.fr/catalognumber/mnhn/p/p05154068	P05154068															PRESENT	hb
694812462				CC_BY_4_0						http://grbio.org/institution/museum-national-dhistoire-naturelle			MNHN	P			PRESERVED_SPECIMEN				http://coldb.mnhn.fr/catalognumber/mnhn/p/p05154066	P05154066															PRESENT	hb
694812461				CC_BY_4_0						http://grbio.org/institution/museum-national-dhistoire-naturelle			MNHN	P			PRESERVED_SPECIMEN				http://coldb.mnhn.fr/catalognumber/mnhn/p/p05154065	P05154065															PRESENT	hb
694812460				CC_BY_4_0						http://grbio.org/institution/museum-national-dhistoire-naturelle			MNHN	P			PRESERVED_SPECIMEN				http://coldb.mnhn.fr/catalognumber/mnhn/p/p05154064	P05154064															PRESENT	hb
694812459				CC_BY_4_0						http://grbio.org/institution/museum-national-dhistoire-naturelle			MNHN	P			PRESERVED_SPECIMEN				http://coldb.mnhn.fr/catalognumber/mnhn/p/p05154062	P05154062															PRESENT	hb
694812458				CC_BY_4_0						http://grbio.org/institution/museum-national-dhistoire-naturelle			MNHN	P			PRESERVED_SPECIMEN				http://coldb.mnhn.fr/catalognumber/mnhn/p/p05154061	P05154061															PRESENT	hb
694812457				CC_BY_4_0						http://grbio.org/institution/museum-national-dhistoire-naturelle			MNHN	P			PRESERVED_SPECIMEN				http://coldb.mnhn.fr/catalognumber/mnhn/p/p05154060	P05154060															PRESENT	hb
694812456				CC_BY_4_0						http://grbio.org/institution/museum-national-dhistoire-naturelle			MNHN	P			PRESERVED_SPECIMEN				http://coldb.mnhn.fr/catalognumber/mnhn/p/p05154059	P05154059															PRESENT	hb
694812358				CC_BY_4_0						http://grbio.org/institution/museum-national-dhistoire-naturelle			MNHN	P			PRESERVED_SPECIMEN				http://coldb.mnhn.fr/catalognumber/mnhn/p/p05154151	P05154151															PRESENT	hb
694812357				CC_BY_4_0						http://grbio.org/institution/museum-national-dhistoire-naturelle			MNHN	P			PRESERVED_SPECIMEN				http://coldb.mnhn.fr/catalognumber/mnhn/p/p05154150	P05154150															PRESENT	hb
694812356				CC_BY_4_0						http://grbio.org/institution/museum-national-dhistoire-naturelle			MNHN	P			PRESERVED_SPECIMEN				http://coldb.mnhn.fr/catalognumber/mnhn/p/p05154149	P05154149															PRESENT	hb
694812355				CC_BY_4_0						http://grbio.org/institution/museum-national-dhistoire-naturelle			MNHN	P			PRESERVED_SPECIMEN				http://coldb.mnhn.fr/catalognumber/mnhn/p/p05154148	P05154148															PRESENT	hb
694812354				CC_BY_4_0						http://grbio.org/institution/museum-national-dhistoire-naturelle			MNHN	P			PRESERVED_SPECIMEN				http://coldb.mnhn.fr/catalognumber/mnhn/p/p05154147	P05154147															PRESENT	hb
694812353				CC_BY_4_0						http://grbio.org/institution/museum-national-dhistoire-naturelle			MNHN	P			PRESERVED_SPECIMEN				http://coldb.mnhn.fr/catalognumber/mnhn/p/p05154146	P05154146															PRESENT	hb
694812352				CC_BY_4_0						http://grbio.org/institution/museum-national-dhistoire-naturelle			MNHN	P			PRESERVED_SPECIMEN				http://coldb.mnhn.fr/catalognumber/mnhn/p/p05154144	P05154144															PRESENT	hb
694812351				CC_BY_4_0						http://grbio.org/institution/museum-national-dhistoire-naturelle			MNHN	P			PRESERVED_SPECIMEN				http://coldb.mnhn.fr/catalognumber/mnhn/p/p05154143	P05154143															PRESENT	hb
694812350				CC_BY_4_0						http://grbio.org/institution/museum-national-dhistoire-naturelle			MNHN	P			PRESERVED_SPECIMEN				http://coldb.mnhn.fr/catalognumber/mnhn/p/p05154142	P05154142															PRESENT	hb
694812349				CC_BY_4_0						http://grbio.org/institution/museum-national-dhistoire-naturelle			MNHN	P			PRESERVED_SPECIMEN				http://coldb.mnhn.fr/catalognumber/mnhn/p/p05154141	P05154141															PRESENT	hb
694812348				CC_BY_4_0						http://grbio.org/institution/museum-national-dhistoire-naturelle			MNHN	P			PRESERVED_SPECIMEN				http://coldb.mnhn.fr/catalognumber/mnhn/p/p05154140	P05154140															PRESENT	hb
694812347				CC_BY_4_0						http://grbio.org/institution/museum-national-dhistoire-naturelle			MNHN	P			PRESERVED_SPECIMEN				http://coldb.mnhn.fr/catalognumber/mnhn/p/p05154139	P05154139															PRESENT	hb
694812346				CC_BY_4_0						http://grbio.org/institution/museum-national-dhistoire-naturelle			MNHN	P			PRESERVED_SPECIMEN				http://coldb.mnhn.fr/catalognumber/mnhn/p/p05154138	P05154138															PRESENT	hb
694812345				CC_BY_4_0						http://grbio.org/institution/museum-national-dhistoire-naturelle			MNHN	P			PRESERVED_SPECIMEN				http://coldb.mnhn.fr/catalognumber/mnhn/p/p05154137	P05154137															PRESENT	hb
694812344				CC_BY_4_0						http://grbio.org/institution/museum-national-dhistoire-naturelle			MNHN	P			PRESERVED_SPECIMEN				http://coldb.mnhn.fr/catalognumber/mnhn/p/p05154136	P05154136															PRESENT	hb
694812343				CC_BY_4_0						http://grbio.org/institution/museum-national-dhistoire-naturelle			MNHN	P			PRESERVED_SPECIMEN				http://coldb.mnhn.fr/catalognumber/mnhn/p/p05154134	P05154134															PRESENT	hb
694812342				CC_BY_4_0						http://grbio.org/institution/museum-national-dhistoire-naturelle			MNHN	P			PRESERVED_SPECIMEN				http://coldb.mnhn.fr/catalognumber/mnhn/p/p05154133	P05154133															PRESENT	hb
694812341				CC_BY_4_0						http://grbio.org/institution/museum-national-dhistoire-naturelle			MNHN	P			PRESERVED_SPECIMEN				http://coldb.mnhn.fr/catalognumber/mnhn/p/p05154132	P05154132															PRESENT	hb
694812340				CC_BY_4_0						http://grbio.org/institution/museum-national-dhistoire-naturelle			MNHN	P			PRESERVED_SPECIMEN				http://coldb.mnhn.fr/catalognumber/mnhn/p/p05154131	P05154131															PRESENT	hb
694812339				CC_BY_4_0						http://grbio.org/institution/museum-national-dhistoire-naturelle			MNHN	P			PRESERVED_SPECIMEN				http://coldb.mnhn.fr/catalognumber/mnhn/p/p05154129	P05154129															PRESENT	hb
694812227				CC_BY_4_0						http://grbio.org/institution/museum-national-dhistoire-naturelle			MNHN	P			PRESERVED_SPECIMEN				http://coldb.mnhn.fr/catalognumber/mnhn/p/p05154126	P05154126															PRESENT	hb
694812226				CC_BY_4_0						http://grbio.org/institution/museum-national-dhistoire-naturelle			MNHN	P			PRESERVED_SPECIMEN				http://coldb.mnhn.fr/catalognumber/mnhn/p/p05154125	P05154125															PRESENT	hb
694812225				CC_BY_4_0						http://grbio.org/institution/museum-national-dhistoire-naturelle			MNHN	P			PRESERVED_SPECIMEN				http://coldb.mnhn.fr/catalognumber/mnhn/p/p05154124	P05154124															PRESENT	hb
694812224				CC_BY_4_0						http://grbio.org/institution/museum-national-dhistoire-naturelle			MNHN	P			PRESERVED_SPECIMEN				http://coldb.mnhn.fr/catalognumber/mnhn/p/p05154123	P05154123															PRESENT	hb
694812223				CC_BY_4_0						http://grbio.org/institution/museum-national-dhistoire-naturelle			MNHN	P			PRESERVED_SPECIMEN				http://coldb.mnhn.fr/catalognumber/mnhn/p/p05154120	P05154120															PRESENT	hb
694812222				CC_BY_4_0						http://grbio.org/institution/museum-national-dhistoire-naturelle			MNHN	P			PRESERVED_SPECIMEN				http://coldb.mnhn.fr/catalognumber/mnhn/p/p05154119	P05154119															PRESENT	hb
694812221				CC_BY_4_0						http://grbio.org/institution/museum-national-dhistoire-naturelle			MNHN	P			PRESERVED_SPECIMEN				http://coldb.mnhn.fr/catalognumber/mnhn/p/p05154117	P05154117															PRESENT	hb
694812220				CC_BY_4_0						http://grbio.org/institution/museum-national-dhistoire-naturelle			MNHN	P			PRESERVED_SPECIMEN				http://coldb.mnhn.fr/catalognumber/mnhn/p/p05154116	P05154116															PRESENT	hb
694812219				CC_BY_4_0						http://grbio.org/institution/museum-national-dhistoire-naturelle			MNHN	P			PRESERVED_SPECIMEN				http://coldb.mnhn.fr/catalognumber/mnhn/p/p05154115	P05154115															PRESENT	hb
694812218				CC_BY_4_0						http://grbio.org/institution/museum-national-dhistoire-naturelle			MNHN	P			PRESERVED_SPECIMEN				http://coldb.mnhn.fr/catalognumber/mnhn/p/p05154113	P05154113															PRESENT	hb
694812217				CC_BY_4_0						http://grbio.org/institution/museum-national-dhistoire-naturelle			MNHN	P			PRESERVED_SPECIMEN				http://coldb.mnhn.fr/catalognumber/mnhn/p/p05154111	P05154111															PRESENT	hb
694812216				CC_BY_4_0						http://grbio.org/institution/museum-national-dhistoire-naturelle			MNHN	P			PRESERVED_SPECIMEN				http://coldb.mnhn.fr/catalognumber/mnhn/p/p05154110	P05154110															PRESENT	hb
694812215				CC_BY_4_0						http://grbio.org/institution/museum-national-dhistoire-naturelle			MNHN	P			PRESERVED_SPECIMEN				http://coldb.mnhn.fr/catalognumber/mnhn/p/p05154109	P05154109															PRESENT	hb
694812214				CC_BY_4_0						http://grbio.org/institution/museum-national-dhistoire-naturelle			MNHN	P			PRESERVED_SPECIMEN				http://coldb.mnhn.fr/catalognumber/mnhn/p/p05154108	P05154108															PRESENT	hb
694812213				CC_BY_4_0						http://grbio.org/institution/museum-national-dhistoire-naturelle			MNHN	P			PRESERVED_SPECIMEN				http://coldb.mnhn.fr/catalognumber/mnhn/p/p05154107	P05154107															PRESENT	hb
694812212				CC_BY_4_0						http://grbio.org/institution/museum-national-dhistoire-naturelle			MNHN	P			PRESERVED_SPECIMEN				http://coldb.mnhn.fr/catalognumber/mnhn/p/p05154106	P05154106															PRESENT	hb
694812211				CC_BY_4_0						http://grbio.org/institution/museum-national-dhistoire-naturelle			MNHN	P			PRESERVED_SPECIMEN				http://coldb.mnhn.fr/catalognumber/mnhn/p/p05154103	P05154103															PRESENT	hb
694812210				CC_BY_4_0						http://grbio.org/institution/museum-national-dhistoire-naturelle			MNHN	P			PRESERVED_SPECIMEN				http://coldb.mnhn.fr/catalognumber/mnhn/p/p05154102	P05154102															PRESENT	hb
694812209				CC_BY_4_0						http://grbio.org/institution/museum-national-dhistoire-naturelle			MNHN	P			PRESERVED_SPECIMEN				http://coldb.mnhn.fr/catalognumber/mnhn/p/p05154101	P05154101															PRESENT	hb
694812208				CC_BY_4_0						http://grbio.org/institution/museum-national-dhistoire-naturelle			MNHN	P			PRESERVED_SPECIMEN				http://coldb.mnhn.fr/catalognumber/mnhn/p/p05154100	P05154100															PRESENT	hb
694812207				CC_BY_4_0						http://grbio.org/institution/museum-national-dhistoire-naturelle			MNHN	P			PRESERVED_SPECIMEN				http://coldb.mnhn.fr/catalognumber/mnhn/p/p05154099	P05154099															PRESENT	hb
694812206				CC_BY_4_0						http://grbio.org/institution/museum-national-dhistoire-naturelle			MNHN	P			PRESERVED_SPECIMEN				http://coldb.mnhn.fr/catalognumber/mnhn/p/p05154098	P05154098															PRESENT	hb
694812205				CC_BY_4_0						http://grbio.org/institution/museum-national-dhistoire-naturelle			MNHN	P			PRESERVED_SPECIMEN				http://coldb.mnhn.fr/catalognumber/mnhn/p/p05154097	P05154097															PRESENT	hb
694812204				CC_BY_4_0						http://grbio.org/institution/museum-national-dhistoire-naturelle			MNHN	P			PRESERVED_SPECIMEN				http://coldb.mnhn.fr/catalognumber/mnhn/p/p05154095	P05154095															PRESENT	hb
694812203				CC_BY_4_0						http://grbio.org/institution/museum-national-dhistoire-naturelle			MNHN	P			PRESERVED_SPECIMEN				http://coldb.mnhn.fr/catalognumber/mnhn/p/p05154094	P05154094															PRESENT	hb
694812202				CC_BY_4_0						http://grbio.org/institution/museum-national-dhistoire-naturelle			MNHN	P			PRESERVED_SPECIMEN				http://coldb.mnhn.fr/catalognumber/mnhn/p/p05154093	P05154093															PRESENT	hb
694812201				CC_BY_4_0						http://grbio.org/institution/museum-national-dhistoire-naturelle			MNHN	P			PRESERVED_SPECIMEN				http://coldb.mnhn.fr/catalognumber/mnhn/p/p05154090	P05154090															PRESENT	hb
694812200				CC_BY_4_0						http://grbio.org/institution/museum-national-dhistoire-naturelle			MNHN	P			PRESERVED_SPECIMEN				http://coldb.mnhn.fr/catalognumber/mnhn/p/p05154088	P05154088															PRESENT	hb
694812199				CC_BY_4_0						http://grbio.org/institution/museum-national-dhistoire-naturelle			MNHN	P			PRESERVED_SPECIMEN				http://coldb.mnhn.fr/catalognumber/mnhn/p/p05153634	P05153634															PRESENT	hb
694812198				CC_BY_4_0						http://grbio.org/institution/museum-national-dhistoire-naturelle			MNHN	P			PRESERVED_SPECIMEN				http://coldb.mnhn.fr/catalognumber/mnhn/p/p05153633	P05153633															PRESENT	hb
694812197				CC_BY_4_0						http://grbio.org/institution/museum-national-dhistoire-naturelle			MNHN	P			PRESERVED_SPECIMEN				http://coldb.mnhn.fr/catalognumber/mnhn/p/p05153631	P05153631															PRESENT	hb
694812196				CC_BY_4_0						http://grbio.org/institution/museum-national-dhistoire-naturelle			MNHN	P			PRESERVED_SPECIMEN				http://coldb.mnhn.fr/catalognumber/mnhn/p/p05153630	P05153630															PRESENT	hb
694812195				CC_BY_4_0						http://grbio.org/institution/museum-national-dhistoire-naturelle			MNHN	P			PRESERVED_SPECIMEN				http://coldb.mnhn.fr/catalognumber/mnhn/p/p05153629	P05153629															PRESENT	hb
694812194				CC_BY_4_0						http://grbio.org/institution/museum-national-dhistoire-naturelle			MNHN	P			PRESERVED_SPECIMEN				http://coldb.mnhn.fr/catalognumber/mnhn/p/p05153627	P05153627															PRESENT	hb
694812193				CC_BY_4_0						http://grbio.org/institution/museum-national-dhistoire-naturelle			MNHN	P			PRESERVED_SPECIMEN				http://coldb.mnhn.fr/catalognumber/mnhn/p/p05153626	P05153626															PRESENT	hb
694812192				CC_BY_4_0						http://grbio.org/institution/museum-national-dhistoire-naturelle			MNHN	P			PRESERVED_SPECIMEN				http://coldb.mnhn.fr/catalognumber/mnhn/p/p05153625	P05153625															PRESENT	hb
694812191				CC_BY_4_0						http://grbio.org/institution/museum-national-dhistoire-naturelle			MNHN	P			PRESERVED_SPECIMEN				http://coldb.mnhn.fr/catalognumber/mnhn/p/p05153622	P05153622															PRESENT	hb
694812190				CC_BY_4_0						http://grbio.org/institution/museum-national-dhistoire-naturelle			MNHN	P			PRESERVED_SPECIMEN				http://coldb.mnhn.fr/catalognumber/mnhn/p/p05153620	P05153620															PRESENT	hb
694812189				CC_BY_4_0						http://grbio.org/institution/museum-national-dhistoire-naturelle			MNHN	P			PRESERVED_SPECIMEN				http://coldb.mnhn.fr/catalognumber/mnhn/p/p05153619	P05153619															PRESENT	hb
694812188				CC_BY_4_0						http://grbio.org/institution/museum-national-dhistoire-naturelle			MNHN	P			PRESERVED_SPECIMEN				http://coldb.mnhn.fr/catalognumber/mnhn/p/p05153617	P05153617															PRESENT	hb
694812187				CC_BY_4_0						http://grbio.org/institution/museum-national-dhistoire-naturelle			MNHN	P			PRESERVED_SPECIMEN				http://coldb.mnhn.fr/catalognumber/mnhn/p/p05153616	P05153616															PRESENT	hb
694812186				CC_BY_4_0						http://grbio.org/institution/museum-national-dhistoire-naturelle			MNHN	P			PRESERVED_SPECIMEN				http://coldb.mnhn.fr/catalognumber/mnhn/p/p05153615	P05153615															PRESENT	hb
694812185				CC_BY_4_0						http://grbio.org/institution/museum-national-dhistoire-naturelle			MNHN	P			PRESERVED_SPECIMEN				http://coldb.mnhn.fr/catalognumber/mnhn/p/p05153614	P05153614															PRESENT	hb
694812184				CC_BY_4_0						http://grbio.org/institution/museum-national-dhistoire-naturelle			MNHN	P			PRESERVED_SPECIMEN				http://coldb.mnhn.fr/catalognumber/mnhn/p/p05153613	P05153613															PRESENT	hb
694812183				CC_BY_4_0						http://grbio.org/institution/museum-national-dhistoire-naturelle			MNHN	P			PRESERVED_SPECIMEN				http://coldb.mnhn.fr/catalognumber/mnhn/p/p05153612	P05153612															PRESENT	hb
694812182				CC_BY_4_0						http://grbio.org/institution/museum-national-dhistoire-naturelle			MNHN	P			PRESERVED_SPECIMEN				http://coldb.mnhn.fr/catalognumber/mnhn/p/p05153610	P05153610															PRESENT	hb
694812181				CC_BY_4_0						http://grbio.org/institution/museum-national-dhistoire-naturelle			MNHN	P			PRESERVED_SPECIMEN				http://coldb.mnhn.fr/catalognumber/mnhn/p/p05153609	P05153609															PRESENT	hb
694812180				CC_BY_4_0						http://grbio.org/institution/museum-national-dhistoire-naturelle			MNHN	P			PRESERVED_SPECIMEN				http://coldb.mnhn.fr/catalognumber/mnhn/p/p05153608	P05153608															PRESENT	hb
694812179				CC_BY_4_0						http://grbio.org/institution/museum-national-dhistoire-naturelle			MNHN	P			PRESERVED_SPECIMEN				http://coldb.mnhn.fr/catalognumber/mnhn/p/p05153607	P05153607															PRESENT	hb
694812178				CC_BY_4_0						http://grbio.org/institution/museum-national-dhistoire-naturelle			MNHN	P			PRESERVED_SPECIMEN				http://coldb.mnhn.fr/catalognumber/mnhn/p/p05153606	P05153606															PRESENT	hb
694812177				CC_BY_4_0						http://grbio.org/institution/museum-national-dhistoire-naturelle			MNHN	P			PRESERVED_SPECIMEN				http://coldb.mnhn.fr/catalognumber/mnhn/p/p05153604	P05153604															PRESENT	hb
694812176				CC_BY_4_0						http://grbio.org/institution/museum-national-dhistoire-naturelle			MNHN	P			PRESERVED_SPECIMEN				http://coldb.mnhn.fr/catalognumber/mnhn/p/p05153602	P05153602															PRESENT	hb
694812175				CC_BY_4_0						http://grbio.org/institution/museum-national-dhistoire-naturelle			MNHN	P			PRESERVED_SPECIMEN				http://coldb.mnhn.fr/catalognumber/mnhn/p/p05153601	P05153601															PRESENT	hb
694812174				CC_BY_4_0						http://grbio.org/institution/museum-national-dhistoire-naturelle			MNHN	P			PRESERVED_SPECIMEN				http://coldb.mnhn.fr/catalognumber/mnhn/p/p05153600	P05153600															PRESENT	hb
694812073				CC_BY_4_0						http://grbio.org/institution/museum-national-dhistoire-naturelle			MNHN	P			PRESERVED_SPECIMEN				http://coldb.mnhn.fr/catalognumber/mnhn/p/p05154157	P05154157															PRESENT	hb
694812072				CC_BY_4_0						http://grbio.org/institution/museum-national-dhistoire-naturelle			MNHN	P			PRESERVED_SPECIMEN				http://coldb.mnhn.fr/catalognumber/mnhn/p/p05154156	P05154156															PRESENT	hb
694812071				CC_BY_4_0						http://grbio.org/institution/museum-national-dhistoire-naturelle			MNHN	P			PRESERVED_SPECIMEN				http://coldb.mnhn.fr/catalognumber/mnhn/p/p05154154	P05154154															PRESENT	hb
694812070				CC_BY_4_0						http://grbio.org/institution/museum-national-dhistoire-naturelle			MNHN	P			PRESERVED_SPECIMEN				http://coldb.mnhn.fr/catalognumber/mnhn/p/p05154153	P05154153															PRESENT	hb
694812069				CC_BY_4_0						http://grbio.org/institution/museum-national-dhistoire-naturelle			MNHN	P			PRESERVED_SPECIMEN				http://coldb.mnhn.fr/catalognumber/mnhn/p/p05153697	P05153697															PRESENT	hb
694812068				CC_BY_4_0						http://grbio.org/institution/museum-national-dhistoire-naturelle			MNHN	P			PRESERVED_SPECIMEN				http://coldb.mnhn.fr/catalognumber/mnhn/p/p05153696	P05153696															PRESENT	hb
694812067				CC_BY_4_0						http://grbio.org/institution/museum-national-dhistoire-naturelle			MNHN	P			PRESERVED_SPECIMEN				http://coldb.mnhn.fr/catalognumber/mnhn/p/p05153694	P05153694															PRESENT	hb
694812066				CC_BY_4_0						http://grbio.org/institution/museum-national-dhistoire-naturelle			MNHN	P			PRESERVED_SPECIMEN				http://coldb.mnhn.fr/catalognumber/mnhn/p/p05153691	P05153691															PRESENT	hb
694812065				CC_BY_4_0						http://grbio.org/institution/museum-national-dhistoire-naturelle			MNHN	P			PRESERVED_SPECIMEN				http://coldb.mnhn.fr/catalognumber/mnhn/p/p05153689	P05153689															PRESENT	hb
694812064				CC_BY_4_0						http://grbio.org/institution/museum-national-dhistoire-naturelle			MNHN	P			PRESERVED_SPECIMEN				http://coldb.mnhn.fr/catalognumber/mnhn/p/p05153688	P05153688															PRESENT	hb
694812063				CC_BY_4_0						http://grbio.org/institution/museum-national-dhistoire-naturelle			MNHN	P			PRESERVED_SPECIMEN				http://coldb.mnhn.fr/catalognumber/mnhn/p/p05153687	P05153687															PRESENT	hb
694812062				CC_BY_4_0						http://grbio.org/institution/museum-national-dhistoire-naturelle			MNHN	P			PRESERVED_SPECIMEN				http://coldb.mnhn.fr/catalognumber/mnhn/p/p05153599	P05153599															PRESENT	hb
694812061				CC_BY_4_0						http://grbio.org/institution/museum-national-dhistoire-naturelle			MNHN	P			PRESERVED_SPECIMEN				http://coldb.mnhn.fr/catalognumber/mnhn/p/p05153598	P05153598															PRESENT	hb
694812060				CC_BY_4_0						http://grbio.org/institution/museum-national-dhistoire-naturelle			MNHN	P			PRESERVED_SPECIMEN				http://coldb.mnhn.fr/catalognumber/mnhn/p/p05153596	P05153596															PRESENT	hb
694812059				CC_BY_4_0						http://grbio.org/institution/museum-national-dhistoire-naturelle			MNHN	P			PRESERVED_SPECIMEN				http://coldb.mnhn.fr/catalognumber/mnhn/p/p05153595	P05153595															PRESENT	hb
694812058				CC_BY_4_0						http://grbio.org/institution/museum-national-dhistoire-naturelle			MNHN	P			PRESERVED_SPECIMEN				http://coldb.mnhn.fr/catalognumber/mnhn/p/p05153594	P05153594															PRESENT	hb
694812057				CC_BY_4_0						http://grbio.org/institution/museum-national-dhistoire-naturelle			MNHN	P			PRESERVED_SPECIMEN				http://coldb.mnhn.fr/catalognumber/mnhn/p/p05153593	P05153593															PRESENT	hb
694812056				CC_BY_4_0						http://grbio.org/institution/museum-national-dhistoire-naturelle			MNHN	P			PRESERVED_SPECIMEN				http://coldb.mnhn.fr/catalognumber/mnhn/p/p05153592	P05153592															PRESENT	hb
694812055				CC_BY_4_0						http://grbio.org/institution/museum-national-dhistoire-naturelle			MNHN	P			PRESERVED_SPECIMEN				http://coldb.mnhn.fr/catalognumber/mnhn/p/p05153590	P05153590															PRESENT	hb
694812054				CC_BY_4_0						http://grbio.org/institution/museum-national-dhistoire-naturelle			MNHN	P			PRESERVED_SPECIMEN				http://coldb.mnhn.fr/catalognumber/mnhn/p/p05153589	P05153589															PRESENT	hb
694812053				CC_BY_4_0						http://grbio.org/institution/museum-national-dhistoire-naturelle			MNHN	P			PRESERVED_SPECIMEN				http://coldb.mnhn.fr/catalognumber/mnhn/p/p05153588	P05153588															PRESENT	hb
694812052				CC_BY_4_0						http://grbio.org/institution/museum-national-dhistoire-naturelle			MNHN	P			PRESERVED_SPECIMEN				http://coldb.mnhn.fr/catalognumber/mnhn/p/p05153587	P05153587															PRESENT	hb
694812051				CC_BY_4_0						http://grbio.org/institution/museum-national-dhistoire-naturelle			MNHN	P			PRESERVED_SPECIMEN				http://coldb.mnhn.fr/catalognumber/mnhn/p/p05153586	P05153586															PRESENT	hb
694812050				CC_BY_4_0						http://grbio.org/institution/museum-national-dhistoire-naturelle			MNHN	P			PRESERVED_SPECIMEN				http://coldb.mnhn.fr/catalognumber/mnhn/p/p05153585	P05153585															PRESENT	hb
694812049				CC_BY_4_0						http://grbio.org/institution/museum-national-dhistoire-naturelle			MNHN	P			PRESERVED_SPECIMEN				http://coldb.mnhn.fr/catalognumber/mnhn/p/p05153584	P05153584															PRESENT	hb
694812048				CC_BY_4_0						http://grbio.org/institution/museum-national-dhistoire-naturelle			MNHN	P			PRESERVED_SPECIMEN				http://coldb.mnhn.fr/catalognumber/mnhn/p/p05153583	P05153583															PRESENT	hb
694812047				CC_BY_4_0						http://grbio.org/institution/museum-national-dhistoire-naturelle			MNHN	P			PRESERVED_SPECIMEN				http://coldb.mnhn.fr/catalognumber/mnhn/p/p05153581	P05153581															PRESENT	hb
694812046				CC_BY_4_0						http://grbio.org/institution/museum-national-dhistoire-naturelle			MNHN	P			PRESERVED_SPECIMEN				http://coldb.mnhn.fr/catalognumber/mnhn/p/p05153580	P05153580															PRESENT	hb
694812045				CC_BY_4_0						http://grbio.org/institution/museum-national-dhistoire-naturelle			MNHN	P			PRESERVED_SPECIMEN				http://coldb.mnhn.fr/catalognumber/mnhn/p/p05153578	P05153578															PRESENT	hb
694811980				CC_BY_4_0						http://grbio.org/institution/museum-national-dhistoire-naturelle			MNHN	P			PRESERVED_SPECIMEN				http://coldb.mnhn.fr/catalognumber/mnhn/p/p05153686	P05153686															PRESENT	hb
694811979				CC_BY_4_0						http://grbio.org/institution/museum-national-dhistoire-naturelle			MNHN	P			PRESERVED_SPECIMEN				http://coldb.mnhn.fr/catalognumber/mnhn/p/p05153685	P05153685															PRESENT	hb
694811978				CC_BY_4_0						http://grbio.org/institution/museum-national-dhistoire-naturelle			MNHN	P			PRESERVED_SPECIMEN				http://coldb.mnhn.fr/catalognumber/mnhn/p/p05153683	P05153683															PRESENT	hb
694811977				CC_BY_4_0						http://grbio.org/institution/museum-national-dhistoire-naturelle			MNHN	P			PRESERVED_SPECIMEN				http://coldb.mnhn.fr/catalognumber/mnhn/p/p05153682	P05153682															PRESENT	hb
694811976				CC_BY_4_0						http://grbio.org/institution/museum-national-dhistoire-naturelle			MNHN	P			PRESERVED_SPECIMEN				http://coldb.mnhn.fr/catalognumber/mnhn/p/p05153681	P05153681															PRESENT	hb
694811975				CC_BY_4_0						http://grbio.org/institution/museum-national-dhistoire-naturelle			MNHN	P			PRESERVED_SPECIMEN				http://coldb.mnhn.fr/catalognumber/mnhn/p/p05153680	P05153680															PRESENT	hb
694811974				CC_BY_4_0						http://grbio.org/institution/museum-national-dhistoire-naturelle			MNHN	P			PRESERVED_SPECIMEN				http://coldb.mnhn.fr/catalognumber/mnhn/p/p05153679	P05153679															PRESENT	hb
694811973				CC_BY_4_0						http://grbio.org/institution/museum-national-dhistoire-naturelle			MNHN	P			PRESERVED_SPECIMEN				http://coldb.mnhn.fr/catalognumber/mnhn/p/p05153678	P05153678															PRESENT	hb
694811972				CC_BY_4_0						http://grbio.org/institution/museum-national-dhistoire-naturelle			MNHN	P			PRESERVED_SPECIMEN				http://coldb.mnhn.fr/catalognumber/mnhn/p/p05153677	P05153677															PRESENT	hb
694811971				CC_BY_4_0						http://grbio.org/institution/museum-national-dhistoire-naturelle			MNHN	P			PRESERVED_SPECIMEN				http://coldb.mnhn.fr/catalognumber/mnhn/p/p05153676	P05153676															PRESENT	hb
694811970				CC_BY_4_0						http://grbio.org/institution/museum-national-dhistoire-naturelle			MNHN	P			PRESERVED_SPECIMEN				http://coldb.mnhn.fr/catalognumber/mnhn/p/p05153675	P05153675															PRESENT	hb
694811969				CC_BY_4_0						http://grbio.org/institution/museum-national-dhistoire-naturelle			MNHN	P			PRESERVED_SPECIMEN				http://coldb.mnhn.fr/catalognumber/mnhn/p/p05153673	P05153673															PRESENT	hb
694811968				CC_BY_4_0						http://grbio.org/institution/museum-national-dhistoire-naturelle			MNHN	P			PRESERVED_SPECIMEN				http://coldb.mnhn.fr/catalognumber/mnhn/p/p05153672	P05153672															PRESENT	hb
694811967				CC_BY_4_0						http://grbio.org/institution/museum-national-dhistoire-naturelle			MNHN	P			PRESERVED_SPECIMEN				http://coldb.mnhn.fr/catalognumber/mnhn/p/p05153671	P05153671															PRESENT	hb
694811966				CC_BY_4_0						http://grbio.org/institution/museum-national-dhistoire-naturelle			MNHN	P			PRESERVED_SPECIMEN				http://coldb.mnhn.fr/catalognumber/mnhn/p/p05153670	P05153670															PRESENT	hb
694811965				CC_BY_4_0						http://grbio.org/institution/museum-national-dhistoire-naturelle			MNHN	P			PRESERVED_SPECIMEN				http://coldb.mnhn.fr/catalognumber/mnhn/p/p05153669	P05153669															PRESENT	hb
694811964				CC_BY_4_0						http://grbio.org/institution/museum-national-dhistoire-naturelle			MNHN	P			PRESERVED_SPECIMEN				http://coldb.mnhn.fr/catalognumber/mnhn/p/p05153666	P05153666															PRESENT	hb
694811963				CC_BY_4_0						http://grbio.org/institution/museum-national-dhistoire-naturelle			MNHN	P			PRESERVED_SPECIMEN				http://coldb.mnhn.fr/catalognumber/mnhn/p/p05153664	P05153664															PRESENT	hb
694811962				CC_BY_4_0						http://grbio.org/institution/museum-national-dhistoire-naturelle			MNHN	P			PRESERVED_SPECIMEN				http://coldb.mnhn.fr/catalognumber/mnhn/p/p05153662	P05153662															PRESENT	hb
694811961				CC_BY_4_0						http://grbio.org/institution/museum-national-dhistoire-naturelle			MNHN	P			PRESERVED_SPECIMEN				http://coldb.mnhn.fr/catalognumber/mnhn/p/p05153660	P05153660															PRESENT	hb
694811960				CC_BY_4_0						http://grbio.org/institution/museum-national-dhistoire-naturelle			MNHN	P			PRESERVED_SPECIMEN				http://coldb.mnhn.fr/catalognumber/mnhn/p/p05153659	P05153659															PRESENT	hb
694811959				CC_BY_4_0						http://grbio.org/institution/museum-national-dhistoire-naturelle			MNHN	P			PRESERVED_SPECIMEN				http://coldb.mnhn.fr/catalognumber/mnhn/p/p05153658	P05153658															PRESENT	hb
694811958				CC_BY_4_0						http://grbio.org/institution/museum-national-dhistoire-naturelle			MNHN	P			PRESERVED_SPECIMEN				http://coldb.mnhn.fr/catalognumber/mnhn/p/p05153657	P05153657															PRESENT	hb
694811957				CC_BY_4_0						http://grbio.org/institution/museum-national-dhistoire-naturelle			MNHN	P			PRESERVED_SPECIMEN				http://coldb.mnhn.fr/catalognumber/mnhn/p/p05153654	P05153654															PRESENT	hb
694811956				CC_BY_4_0						http://grbio.org/institution/museum-national-dhistoire-naturelle			MNHN	P			PRESERVED_SPECIMEN				http://coldb.mnhn.fr/catalognumber/mnhn/p/p05153653	P05153653															PRESENT	hb
694811955				CC_BY_4_0						http://grbio.org/institution/museum-national-dhistoire-naturelle			MNHN	P			PRESERVED_SPECIMEN				http://coldb.mnhn.fr/catalognumber/mnhn/p/p05153652	P05153652															PRESENT	hb
694811954				CC_BY_4_0						http://grbio.org/institution/museum-national-dhistoire-naturelle			MNHN	P			PRESERVED_SPECIMEN				http://coldb.mnhn.fr/catalognumber/mnhn/p/p05153651	P05153651															PRESENT	hb
694811953				CC_BY_4_0						http://grbio.org/institution/museum-national-dhistoire-naturelle			MNHN	P			PRESERVED_SPECIMEN				http://coldb.mnhn.fr/catalognumber/mnhn/p/p05153649	P05153649															PRESENT	hb
694811952				CC_BY_4_0						http://grbio.org/institution/museum-national-dhistoire-naturelle			MNHN	P			PRESERVED_SPECIMEN				http://coldb.mnhn.fr/catalognumber/mnhn/p/p05153648	P05153648															PRESENT	hb
694811951				CC_BY_4_0						http://grbio.org/institution/museum-national-dhistoire-naturelle			MNHN	P			PRESERVED_SPECIMEN				http://coldb.mnhn.fr/catalognumber/mnhn/p/p05153647	P05153647															PRESENT	hb
694811950				CC_BY_4_0						http://grbio.org/institution/museum-national-dhistoire-naturelle			MNHN	P			PRESERVED_SPECIMEN				http://coldb.mnhn.fr/catalognumber/mnhn/p/p05153646	P05153646															PRESENT	hb
694811949				CC_BY_4_0						http://grbio.org/institution/museum-national-dhistoire-naturelle			MNHN	P			PRESERVED_SPECIMEN				http://coldb.mnhn.fr/catalognumber/mnhn/p/p05153645	P05153645															PRESENT	hb
694811948				CC_BY_4_0						http://grbio.org/institution/museum-national-dhistoire-naturelle			MNHN	P			PRESERVED_SPECIMEN				http://coldb.mnhn.fr/catalognumber/mnhn/p/p05153643	P05153643															PRESENT	hb
694811947				CC_BY_4_0						http://grbio.org/institution/museum-national-dhistoire-naturelle			MNHN	P			PRESERVED_SPECIMEN				http://coldb.mnhn.fr/catalognumber/mnhn/p/p05153642	P05153642															PRESENT	hb
694811946				CC_BY_4_0						http://grbio.org/institution/museum-national-dhistoire-naturelle			MNHN	P			PRESERVED_SPECIMEN				http://coldb.mnhn.fr/catalognumber/mnhn/p/p05153641	P05153641															PRESENT	hb
694811945				CC_BY_4_0						http://grbio.org/institution/museum-national-dhistoire-naturelle			MNHN	P			PRESERVED_SPECIMEN				http://coldb.mnhn.fr/catalognumber/mnhn/p/p05153640	P05153640															PRESENT	hb
694811944				CC_BY_4_0						http://grbio.org/institution/museum-national-dhistoire-naturelle			MNHN	P			PRESERVED_SPECIMEN				http://coldb.mnhn.fr/catalognumber/mnhn/p/p05153639	P05153639															PRESENT	hb
694811943				CC_BY_4_0						http://grbio.org/institution/museum-national-dhistoire-naturelle			MNHN	P			PRESERVED_SPECIMEN				http://coldb.mnhn.fr/catalognumber/mnhn/p/p05153637	P05153637															PRESENT	hb
694811942				CC_BY_4_0						http://grbio.org/institution/museum-national-dhistoire-naturelle			MNHN	P			PRESERVED_SPECIMEN				http://coldb.mnhn.fr/catalognumber/mnhn/p/p05153636	P05153636															PRESENT	hb
694811941				CC_BY_4_0						http://grbio.org/institution/museum-national-dhistoire-naturelle			MNHN	P			PRESERVED_SPECIMEN				http://coldb.mnhn.fr/catalognumber/mnhn/p/p05153635	P05153635															PRESENT	hb
694811818				CC_BY_4_0						http://grbio.org/institution/museum-national-dhistoire-naturelle			MNHN	P			PRESERVED_SPECIMEN				http://coldb.mnhn.fr/catalognumber/mnhn/p/p05153749	P05153749															PRESENT	hb
694811817				CC_BY_4_0						http://grbio.org/institution/museum-national-dhistoire-naturelle			MNHN	P			PRESERVED_SPECIMEN				http://coldb.mnhn.fr/catalognumber/mnhn/p/p05153745	P05153745															PRESENT	hb
694811816				CC_BY_4_0						http://grbio.org/institution/museum-national-dhistoire-naturelle			MNHN	P			PRESERVED_SPECIMEN				http://coldb.mnhn.fr/catalognumber/mnhn/p/p05153744	P05153744															PRESENT	hb
694811815				CC_BY_4_0						http://grbio.org/institution/museum-national-dhistoire-naturelle			MNHN	P			PRESERVED_SPECIMEN				http://coldb.mnhn.fr/catalognumber/mnhn/p/p05153742	P05153742															PRESENT	hb
694811814				CC_BY_4_0						http://grbio.org/institution/museum-national-dhistoire-naturelle			MNHN	P			PRESERVED_SPECIMEN				http://coldb.mnhn.fr/catalognumber/mnhn/p/p05153741	P05153741															PRESENT	hb
694811813				CC_BY_4_0						http://grbio.org/institution/museum-national-dhistoire-naturelle			MNHN	P			PRESERVED_SPECIMEN				http://coldb.mnhn.fr/catalognumber/mnhn/p/p05153740	P05153740															PRESENT	hb
694811812				CC_BY_4_0						http://grbio.org/institution/museum-national-dhistoire-naturelle			MNHN	P			PRESERVED_SPECIMEN				http://coldb.mnhn.fr/catalognumber/mnhn/p/p05153739	P05153739															PRESENT	hb
694811811				CC_BY_4_0						http://grbio.org/institution/museum-national-dhistoire-naturelle			MNHN	P			PRESERVED_SPECIMEN				http://coldb.mnhn.fr/catalognumber/mnhn/p/p05153737	P05153737															PRESENT	hb
694811810				CC_BY_4_0						http://grbio.org/institution/museum-national-dhistoire-naturelle			MNHN	P			PRESERVED_SPECIMEN				http://coldb.mnhn.fr/catalognumber/mnhn/p/p05153736	P05153736															PRESENT	hb
694811809				CC_BY_4_0						http://grbio.org/institution/museum-national-dhistoire-naturelle			MNHN	P			PRESERVED_SPECIMEN				http://coldb.mnhn.fr/catalognumber/mnhn/p/p05153731	P05153731															PRESENT	hb
694811808				CC_BY_4_0						http://grbio.org/institution/museum-national-dhistoire-naturelle			MNHN	P			PRESERVED_SPECIMEN				http://coldb.mnhn.fr/catalognumber/mnhn/p/p05153728	P05153728															PRESENT	hb
694811807				CC_BY_4_0						http://grbio.org/institution/museum-national-dhistoire-naturelle			MNHN	P			PRESERVED_SPECIMEN				http://coldb.mnhn.fr/catalognumber/mnhn/p/p05153727	P05153727															PRESENT	hb
694811806				CC_BY_4_0						http://grbio.org/institution/museum-national-dhistoire-naturelle			MNHN	P			PRESERVED_SPECIMEN				http://coldb.mnhn.fr/catalognumber/mnhn/p/p05153726	P05153726															PRESENT	hb
694811805				CC_BY_4_0						http://grbio.org/institution/museum-national-dhistoire-naturelle			MNHN	P			PRESERVED_SPECIMEN				http://coldb.mnhn.fr/catalognumber/mnhn/p/p05153724	P05153724															PRESENT	hb
694811804				CC_BY_4_0						http://grbio.org/institution/museum-national-dhistoire-naturelle			MNHN	P			PRESERVED_SPECIMEN				http://coldb.mnhn.fr/catalognumber/mnhn/p/p05153722	P05153722															PRESENT	hb
694811803				CC_BY_4_0						http://grbio.org/institution/museum-national-dhistoire-naturelle			MNHN	P			PRESERVED_SPECIMEN				http://coldb.mnhn.fr/catalognumber/mnhn/p/p05153721	P05153721															PRESENT	hb
694811802				CC_BY_4_0						http://grbio.org/institution/museum-national-dhistoire-naturelle			MNHN	P			PRESERVED_SPECIMEN				http://coldb.mnhn.fr/catalognumber/mnhn/p/p05153720	P05153720															PRESENT	hb
694811801				CC_BY_4_0						http://grbio.org/institution/museum-national-dhistoire-naturelle			MNHN	P			PRESERVED_SPECIMEN				http://coldb.mnhn.fr/catalognumber/mnhn/p/p05153719	P05153719															PRESENT	hb
694811800				CC_BY_4_0						http://grbio.org/institution/museum-national-dhistoire-naturelle			MNHN	P			PRESERVED_SPECIMEN				http://coldb.mnhn.fr/catalognumber/mnhn/p/p05153716	P05153716															PRESENT	hb
694811799				CC_BY_4_0						http://grbio.org/institution/museum-national-dhistoire-naturelle			MNHN	P			PRESERVED_SPECIMEN				http://coldb.mnhn.fr/catalognumber/mnhn/p/p05153715	P05153715															PRESENT	hb
694811798				CC_BY_4_0						http://grbio.org/institution/museum-national-dhistoire-naturelle			MNHN	P			PRESERVED_SPECIMEN				http://coldb.mnhn.fr/catalognumber/mnhn/p/p05153714	P05153714															PRESENT	hb
694811797				CC_BY_4_0						http://grbio.org/institution/museum-national-dhistoire-naturelle			MNHN	P			PRESERVED_SPECIMEN				http://coldb.mnhn.fr/catalognumber/mnhn/p/p05153713	P05153713															PRESENT	hb
694811796				CC_BY_4_0						http://grbio.org/institution/museum-national-dhistoire-naturelle			MNHN	P			PRESERVED_SPECIMEN				http://coldb.mnhn.fr/catalognumber/mnhn/p/p05153712	P05153712															PRESENT	hb
694811795				CC_BY_4_0						http://grbio.org/institution/museum-national-dhistoire-naturelle			MNHN	P			PRESERVED_SPECIMEN				http://coldb.mnhn.fr/catalognumber/mnhn/p/p05153711	P05153711															PRESENT	hb
694811794				CC_BY_4_0						http://grbio.org/institution/museum-national-dhistoire-naturelle			MNHN	P			PRESERVED_SPECIMEN				http://coldb.mnhn.fr/catalognumber/mnhn/p/p05153710	P05153710															PRESENT	hb
694811793				CC_BY_4_0						http://grbio.org/institution/museum-national-dhistoire-naturelle			MNHN	P			PRESERVED_SPECIMEN				http://coldb.mnhn.fr/catalognumber/mnhn/p/p05153709	P05153709															PRESENT	hb
694811792				CC_BY_4_0						http://grbio.org/institution/museum-national-dhistoire-naturelle			MNHN	P			PRESERVED_SPECIMEN				http://coldb.mnhn.fr/catalognumber/mnhn/p/p05153708	P05153708															PRESENT	hb
694811707				CC_BY_4_0						http://grbio.org/institution/museum-national-dhistoire-naturelle			MNHN	P			PRESERVED_SPECIMEN				http://coldb.mnhn.fr/catalognumber/mnhn/p/p05153704	P05153704															PRESENT	hb
694811706				CC_BY_4_0						http://grbio.org/institution/museum-national-dhistoire-naturelle			MNHN	P			PRESERVED_SPECIMEN				http://coldb.mnhn.fr/catalognumber/mnhn/p/p05153702	P05153702															PRESENT	hb
694811705				CC_BY_4_0						http://grbio.org/institution/museum-national-dhistoire-naturelle			MNHN	P			PRESERVED_SPECIMEN				http://coldb.mnhn.fr/catalognumber/mnhn/p/p05153701	P05153701															PRESENT	hb
694811704				CC_BY_4_0						http://grbio.org/institution/museum-national-dhistoire-naturelle			MNHN	P			PRESERVED_SPECIMEN				http://coldb.mnhn.fr/catalognumber/mnhn/p/p05153700	P05153700															PRESENT	hb
694811008				CC_BY_4_0						http://grbio.org/institution/museum-national-dhistoire-naturelle			MNHN	P			PRESERVED_SPECIMEN				http://coldb.mnhn.fr/catalognumber/mnhn/p/p04667374	P04667374															PRESENT	hb
694811007				CC_BY_4_0						http://grbio.org/institution/museum-national-dhistoire-naturelle			MNHN	P			PRESERVED_SPECIMEN				http://coldb.mnhn.fr/catalognumber/mnhn/p/p04667373	P04667373															PRESENT	hb
694811006				CC_BY_4_0						http://grbio.org/institution/museum-national-dhistoire-naturelle			MNHN	P			PRESERVED_SPECIMEN				http://coldb.mnhn.fr/catalognumber/mnhn/p/p04667372	P04667372															PRESENT	hb
694811005				CC_BY_4_0						http://grbio.org/institution/museum-national-dhistoire-naturelle			MNHN	P			PRESERVED_SPECIMEN				http://coldb.mnhn.fr/catalognumber/mnhn/p/p04667371	P04667371															PRESENT	hb
694811004				CC_BY_4_0						http://grbio.org/institution/museum-national-dhistoire-naturelle			MNHN	P			PRESERVED_SPECIMEN				http://coldb.mnhn.fr/catalognumber/mnhn/p/p04667370	P04667370															PRESENT	hb
694811003				CC_BY_4_0						http://grbio.org/institution/museum-national-dhistoire-naturelle			MNHN	P			PRESERVED_SPECIMEN				http://coldb.mnhn.fr/catalognumber/mnhn/p/p04667369	P04667369															PRESENT	hb
694811002				CC_BY_4_0						http://grbio.org/institution/museum-national-dhistoire-naturelle			MNHN	P			PRESERVED_SPECIMEN				http://coldb.mnhn.fr/catalognumber/mnhn/p/p04667367	P04667367															PRESENT	hb
694811001				CC_BY_4_0						http://grbio.org/institution/museum-national-dhistoire-naturelle			MNHN	P			PRESERVED_SPECIMEN				http://coldb.mnhn.fr/catalognumber/mnhn/p/p04667364	P04667364															PRESENT	hb
694811000				CC_BY_4_0						http://grbio.org/institution/museum-national-dhistoire-naturelle			MNHN	P			PRESERVED_SPECIMEN				http://coldb.mnhn.fr/catalognumber/mnhn/p/p04667363	P04667363															PRESENT	hb
694810999				CC_BY_4_0						http://grbio.org/institution/museum-national-dhistoire-naturelle			MNHN	P			PRESERVED_SPECIMEN				http://coldb.mnhn.fr/catalognumber/mnhn/p/p04667361	P04667361															PRESENT	hb
694810998				CC_BY_4_0						http://grbio.org/institution/museum-national-dhistoire-naturelle			MNHN	P			PRESERVED_SPECIMEN				http://coldb.mnhn.fr/catalognumber/mnhn/p/p04667359	P04667359															PRESENT	hb
694810997				CC_BY_4_0						http://grbio.org/institution/museum-national-dhistoire-naturelle			MNHN	P			PRESERVED_SPECIMEN				http://coldb.mnhn.fr/catalognumber/mnhn/p/p04667358	P04667358															PRESENT	hb
694810996				CC_BY_4_0						http://grbio.org/institution/museum-national-dhistoire-naturelle			MNHN	P			PRESERVED_SPECIMEN				http://coldb.mnhn.fr/catalognumber/mnhn/p/p04667357	P04667357															PRESENT	hb
694810995				CC_BY_4_0						http://grbio.org/institution/museum-national-dhistoire-naturelle			MNHN	P			PRESERVED_SPECIMEN				http://coldb.mnhn.fr/catalognumber/mnhn/p/p04667356	P04667356															PRESENT	hb
694810994				CC_BY_4_0						http://grbio.org/institution/museum-national-dhistoire-naturelle			MNHN	P			PRESERVED_SPECIMEN				http://coldb.mnhn.fr/catalognumber/mnhn/p/p04667355	P04667355															PRESENT	hb
694810993				CC_BY_4_0						http://grbio.org/institution/museum-national-dhistoire-naturelle			MNHN	P			PRESERVED_SPECIMEN				http://coldb.mnhn.fr/catalognumber/mnhn/p/p04667354	P04667354															PRESENT	hb
694810992				CC_BY_4_0						http://grbio.org/institution/museum-national-dhistoire-naturelle			MNHN	P			PRESERVED_SPECIMEN				http://coldb.mnhn.fr/catalognumber/mnhn/p/p04667353	P04667353															PRESENT	hb
694810991				CC_BY_4_0						http://grbio.org/institution/museum-national-dhistoire-naturelle			MNHN	P			PRESERVED_SPECIMEN				http://coldb.mnhn.fr/catalognumber/mnhn/p/p04667352	P04667352															PRESENT	hb
694810990				CC_BY_4_0						http://grbio.org/institution/museum-national-dhistoire-naturelle			MNHN	P			PRESERVED_SPECIMEN				http://coldb.mnhn.fr/catalognumber/mnhn/p/p04667351	P04667351															PRESENT	hb
694810989				CC_BY_4_0						http://grbio.org/institution/museum-national-dhistoire-naturelle			MNHN	P			PRESERVED_SPECIMEN				http://coldb.mnhn.fr/catalognumber/mnhn/p/p04667350	P04667350															PRESENT	hb
694810988				CC_BY_4_0						http://grbio.org/institution/museum-national-dhistoire-naturelle			MNHN	P			PRESERVED_SPECIMEN				http://coldb.mnhn.fr/catalognumber/mnhn/p/p04667349	P04667349															PRESENT	hb
694810987				CC_BY_4_0						http://grbio.org/institution/museum-national-dhistoire-naturelle			MNHN	P			PRESERVED_SPECIMEN				http://coldb.mnhn.fr/catalognumber/mnhn/p/p04667348	P04667348															PRESENT	hb
694810986				CC_BY_4_0						http://grbio.org/institution/museum-national-dhistoire-naturelle			MNHN	P			PRESERVED_SPECIMEN				http://coldb.mnhn.fr/catalognumber/mnhn/p/p04667347	P04667347															PRESENT	hb
694810985				CC_BY_4_0						http://grbio.org/institution/museum-national-dhistoire-naturelle			MNHN	P			PRESERVED_SPECIMEN				http://coldb.mnhn.fr/catalognumber/mnhn/p/p04667346	P04667346															PRESENT	hb
694810984				CC_BY_4_0						http://grbio.org/institution/museum-national-dhistoire-naturelle			MNHN	P			PRESERVED_SPECIMEN				http://coldb.mnhn.fr/catalognumber/mnhn/p/p04667345	P04667345															PRESENT	hb
694810983				CC_BY_4_0						http://grbio.org/institution/museum-national-dhistoire-naturelle			MNHN	P			PRESERVED_SPECIMEN				http://coldb.mnhn.fr/catalognumber/mnhn/p/p04667344	P04667344															PRESENT	hb
694810982				CC_BY_4_0						http://grbio.org/institution/museum-national-dhistoire-naturelle			MNHN	P			PRESERVED_SPECIMEN				http://coldb.mnhn.fr/catalognumber/mnhn/p/p04667343	P04667343															PRESENT	hb
694810981				CC_BY_4_0						http://grbio.org/institution/museum-national-dhistoire-naturelle			MNHN	P			PRESERVED_SPECIMEN				http://coldb.mnhn.fr/catalognumber/mnhn/p/p04667341	P04667341															PRESENT	hb
694810980				CC_BY_4_0						http://grbio.org/institution/museum-national-dhistoire-naturelle			MNHN	P			PRESERVED_SPECIMEN				http://coldb.mnhn.fr/catalognumber/mnhn/p/p04667340	P04667340															PRESENT	hb
694810979				CC_BY_4_0						http://grbio.org/institution/museum-national-dhistoire-naturelle			MNHN	P			PRESERVED_SPECIMEN				http://coldb.mnhn.fr/catalognumber/mnhn/p/p04667339	P04667339															PRESENT	hb
694810978				CC_BY_4_0						http://grbio.org/institution/museum-national-dhistoire-naturelle			MNHN	P			PRESERVED_SPECIMEN				http://coldb.mnhn.fr/catalognumber/mnhn/p/p04667338	P04667338															PRESENT	hb
694810977				CC_BY_4_0						http://grbio.org/institution/museum-national-dhistoire-naturelle			MNHN	P			PRESERVED_SPECIMEN				http://coldb.mnhn.fr/catalognumber/mnhn/p/p04667337	P04667337															PRESENT	hb
694810976				CC_BY_4_0						http://grbio.org/institution/museum-national-dhistoire-naturelle			MNHN	P			PRESERVED_SPECIMEN				http://coldb.mnhn.fr/catalognumber/mnhn/p/p04667336	P04667336															PRESENT	hb
694810975				CC_BY_4_0						http://grbio.org/institution/museum-national-dhistoire-naturelle			MNHN	P			PRESERVED_SPECIMEN				http://coldb.mnhn.fr/catalognumber/mnhn/p/p04667335	P04667335															PRESENT	hb
694810974				CC_BY_4_0						http://grbio.org/institution/museum-national-dhistoire-naturelle			MNHN	P			PRESERVED_SPECIMEN				http://coldb.mnhn.fr/catalognumber/mnhn/p/p04667332	P04667332															PRESENT	hb
694810973				CC_BY_4_0						http://grbio.org/institution/museum-national-dhistoire-naturelle			MNHN	P			PRESERVED_SPECIMEN				http://coldb.mnhn.fr/catalognumber/mnhn/p/p04667331	P04667331															PRESENT	hb
694810972				CC_BY_4_0						http://grbio.org/institution/museum-national-dhistoire-naturelle			MNHN	P			PRESERVED_SPECIMEN				http://coldb.mnhn.fr/catalognumber/mnhn/p/p04667330	P04667330															PRESENT	hb
694810971				CC_BY_4_0						http://grbio.org/institution/museum-national-dhistoire-naturelle			MNHN	P			PRESERVED_SPECIMEN				http://coldb.mnhn.fr/catalognumber/mnhn/p/p04667329	P04667329															PRESENT	hb
694810970				CC_BY_4_0						http://grbio.org/institution/museum-national-dhistoire-naturelle			MNHN	P			PRESERVED_SPECIMEN				http://coldb.mnhn.fr/catalognumber/mnhn/p/p04667328	P04667328															PRESENT	hb
694810969				CC_BY_4_0						http://grbio.org/institution/museum-national-dhistoire-naturelle			MNHN	P			PRESERVED_SPECIMEN				http://coldb.mnhn.fr/catalognumber/mnhn/p/p04667326	P04667326															PRESENT	hb
694810968				CC_BY_4_0						http://grbio.org/institution/museum-national-dhistoire-naturelle			MNHN	P			PRESERVED_SPECIMEN				http://coldb.mnhn.fr/catalognumber/mnhn/p/p04667325	P04667325															PRESENT	hb
694810967				CC_BY_4_0						http://grbio.org/institution/museum-national-dhistoire-naturelle			MNHN	P			PRESERVED_SPECIMEN				http://coldb.mnhn.fr/catalognumber/mnhn/p/p04667324	P04667324															PRESENT	hb
694810966				CC_BY_4_0						http://grbio.org/institution/museum-national-dhistoire-naturelle			MNHN	P			PRESERVED_SPECIMEN				http://coldb.mnhn.fr/catalognumber/mnhn/p/p04667323	P04667323															PRESENT	hb
694810965				CC_BY_4_0						http://grbio.org/institution/museum-national-dhistoire-naturelle			MNHN	P			PRESERVED_SPECIMEN				http://coldb.mnhn.fr/catalognumber/mnhn/p/p04667322	P04667322															PRESENT	hb
694810964				CC_BY_4_0						http://grbio.org/institution/museum-national-dhistoire-naturelle			MNHN	P			PRESERVED_SPECIMEN				http://coldb.mnhn.fr/catalognumber/mnhn/p/p04667321	P04667321															PRESENT	hb
694810963				CC_BY_4_0						http://grbio.org/institution/museum-national-dhistoire-naturelle			MNHN	P			PRESERVED_SPECIMEN				http://coldb.mnhn.fr/catalognumber/mnhn/p/p04667319	P04667319															PRESENT	hb
694810962				CC_BY_4_0						http://grbio.org/institution/museum-national-dhistoire-naturelle			MNHN	P			PRESERVED_SPECIMEN				http://coldb.mnhn.fr/catalognumber/mnhn/p/p04667318	P04667318															PRESENT	hb
694810961				CC_BY_4_0						http://grbio.org/institution/museum-national-dhistoire-naturelle			MNHN	P			PRESERVED_SPECIMEN				http://coldb.mnhn.fr/catalognumber/mnhn/p/p04667317	P04667317															PRESENT	hb
694810960				CC_BY_4_0						http://grbio.org/institution/museum-national-dhistoire-naturelle			MNHN	P			PRESERVED_SPECIMEN				http://coldb.mnhn.fr/catalognumber/mnhn/p/p04667314	P04667314															PRESENT	hb
694810959				CC_BY_4_0						http://grbio.org/institution/museum-national-dhistoire-naturelle			MNHN	P			PRESERVED_SPECIMEN				http://coldb.mnhn.fr/catalognumber/mnhn/p/p04667313	P04667313															PRESENT	hb
694810958				CC_BY_4_0						http://grbio.org/institution/museum-national-dhistoire-naturelle			MNHN	P			PRESERVED_SPECIMEN				http://coldb.mnhn.fr/catalognumber/mnhn/p/p04667312	P04667312															PRESENT	hb
694810957				CC_BY_4_0						http://grbio.org/institution/museum-national-dhistoire-naturelle			MNHN	P			PRESERVED_SPECIMEN				http://coldb.mnhn.fr/catalognumber/mnhn/p/p04667310	P04667310															PRESENT	hb
694810956				CC_BY_4_0						http://grbio.org/institution/museum-national-dhistoire-naturelle			MNHN	P			PRESERVED_SPECIMEN				http://coldb.mnhn.fr/catalognumber/mnhn/p/p04667309	P04667309															PRESENT	hb
694810955				CC_BY_4_0						http://grbio.org/institution/museum-national-dhistoire-naturelle			MNHN	P			PRESERVED_SPECIMEN				http://coldb.mnhn.fr/catalognumber/mnhn/p/p04667308	P04667308															PRESENT	hb
694810954				CC_BY_4_0						http://grbio.org/institution/museum-national-dhistoire-naturelle			MNHN	P			PRESERVED_SPECIMEN				http://coldb.mnhn.fr/catalognumber/mnhn/p/p04667305	P04667305															PRESENT	hb
694810915				CC_BY_4_0						http://grbio.org/institution/museum-national-dhistoire-naturelle			MNHN	P			PRESERVED_SPECIMEN				http://coldb.mnhn.fr/catalognumber/mnhn/p/p04667654	P04667654															PRESENT	hb
694810914				CC_BY_4_0						http://grbio.org/institution/museum-national-dhistoire-naturelle			MNHN	P			PRESERVED_SPECIMEN				http://coldb.mnhn.fr/catalognumber/mnhn/p/p04667653	P04667653															PRESENT	hb
694810913				CC_BY_4_0						http://grbio.org/institution/museum-national-dhistoire-naturelle			MNHN	P			PRESERVED_SPECIMEN				http://coldb.mnhn.fr/catalognumber/mnhn/p/p04667652	P04667652															PRESENT	hb
694810912				CC_BY_4_0						http://grbio.org/institution/museum-national-dhistoire-naturelle			MNHN	P			PRESERVED_SPECIMEN				http://coldb.mnhn.fr/catalognumber/mnhn/p/p04667651	P04667651															PRESENT	hb
694810911				CC_BY_4_0						http://grbio.org/institution/museum-national-dhistoire-naturelle			MNHN	P			PRESERVED_SPECIMEN				http://coldb.mnhn.fr/catalognumber/mnhn/p/p04667650	P04667650															PRESENT	hb
694810910				CC_BY_4_0						http://grbio.org/institution/museum-national-dhistoire-naturelle			MNHN	P			PRESERVED_SPECIMEN				http://coldb.mnhn.fr/catalognumber/mnhn/p/p04667648	P04667648															PRESENT	hb
694810909				CC_BY_4_0						http://grbio.org/institution/museum-national-dhistoire-naturelle			MNHN	P			PRESERVED_SPECIMEN				http://coldb.mnhn.fr/catalognumber/mnhn/p/p04667645	P04667645															PRESENT	hb
694810908				CC_BY_4_0						http://grbio.org/institution/museum-national-dhistoire-naturelle			MNHN	P			PRESERVED_SPECIMEN				http://coldb.mnhn.fr/catalognumber/mnhn/p/p04667644	P04667644															PRESENT	hb
694810907				CC_BY_4_0						http://grbio.org/institution/museum-national-dhistoire-naturelle			MNHN	P			PRESERVED_SPECIMEN				http://coldb.mnhn.fr/catalognumber/mnhn/p/p04667642	P04667642															PRESENT	hb
694810906				CC_BY_4_0						http://grbio.org/institution/museum-national-dhistoire-naturelle			MNHN	P			PRESERVED_SPECIMEN				http://coldb.mnhn.fr/catalognumber/mnhn/p/p04667641	P04667641															PRESENT	hb
694810905				CC_BY_4_0						http://grbio.org/institution/museum-national-dhistoire-naturelle			MNHN	P			PRESERVED_SPECIMEN				http://coldb.mnhn.fr/catalognumber/mnhn/p/p04667640	P04667640															PRESENT	hb
694810904				CC_BY_4_0						http://grbio.org/institution/museum-national-dhistoire-naturelle			MNHN	P			PRESERVED_SPECIMEN				http://coldb.mnhn.fr/catalognumber/mnhn/p/p04667639	P04667639															PRESENT	hb
694810889				CC_BY_4_0						http://grbio.org/institution/museum-national-dhistoire-naturelle			MNHN	P			PRESERVED_SPECIMEN				http://coldb.mnhn.fr/catalognumber/mnhn/p/p04667378	P04667378															PRESENT	hb
694810888				CC_BY_4_0						http://grbio.org/institution/museum-national-dhistoire-naturelle			MNHN	P			PRESERVED_SPECIMEN				http://coldb.mnhn.fr/catalognumber/mnhn/p/p04667377	P04667377															PRESENT	hb
694810887				CC_BY_4_0						http://grbio.org/institution/museum-national-dhistoire-naturelle			MNHN	P			PRESERVED_SPECIMEN				http://coldb.mnhn.fr/catalognumber/mnhn/p/p04667376	P04667376															PRESENT	hb
694810829				CC_BY_4_0						http://grbio.org/institution/museum-national-dhistoire-naturelle			MNHN	P			PRESERVED_SPECIMEN				http://coldb.mnhn.fr/catalognumber/mnhn/p/p04667710	P04667710															PRESENT	hb
694810828				CC_BY_4_0						http://grbio.org/institution/museum-national-dhistoire-naturelle			MNHN	P			PRESERVED_SPECIMEN				http://coldb.mnhn.fr/catalognumber/mnhn/p/p04667709	P04667709															PRESENT	hb
694810827				CC_BY_4_0						http://grbio.org/institution/museum-national-dhistoire-naturelle			MNHN	P			PRESERVED_SPECIMEN				http://coldb.mnhn.fr/catalognumber/mnhn/p/p04667708	P04667708															PRESENT	hb
694810826				CC_BY_4_0						http://grbio.org/institution/museum-national-dhistoire-naturelle			MNHN	P			PRESERVED_SPECIMEN				http://coldb.mnhn.fr/catalognumber/mnhn/p/p04667707	P04667707															PRESENT	hb
694810825				CC_BY_4_0						http://grbio.org/institution/museum-national-dhistoire-naturelle			MNHN	P			PRESERVED_SPECIMEN				http://coldb.mnhn.fr/catalognumber/mnhn/p/p04667706	P04667706															PRESENT	hb
694810824				CC_BY_4_0						http://grbio.org/institution/museum-national-dhistoire-naturelle			MNHN	P			PRESERVED_SPECIMEN				http://coldb.mnhn.fr/catalognumber/mnhn/p/p04667705	P04667705															PRESENT	hb
694810823				CC_BY_4_0						http://grbio.org/institution/museum-national-dhistoire-naturelle			MNHN	P			PRESERVED_SPECIMEN				http://coldb.mnhn.fr/catalognumber/mnhn/p/p04667704	P04667704															PRESENT	hb
694810822				CC_BY_4_0						http://grbio.org/institution/museum-national-dhistoire-naturelle			MNHN	P			PRESERVED_SPECIMEN				http://coldb.mnhn.fr/catalognumber/mnhn/p/p04667702	P04667702															PRESENT	hb
694810821				CC_BY_4_0						http://grbio.org/institution/museum-national-dhistoire-naturelle			MNHN	P			PRESERVED_SPECIMEN				http://coldb.mnhn.fr/catalognumber/mnhn/p/p04667700	P04667700															PRESENT	hb
694810820				CC_BY_4_0						http://grbio.org/institution/museum-national-dhistoire-naturelle			MNHN	P			PRESERVED_SPECIMEN				http://coldb.mnhn.fr/catalognumber/mnhn/p/p04667698	P04667698															PRESENT	hb
694810819				CC_BY_4_0						http://grbio.org/institution/museum-national-dhistoire-naturelle			MNHN	P			PRESERVED_SPECIMEN				http://coldb.mnhn.fr/catalognumber/mnhn/p/p04667696	P04667696															PRESENT	hb
694810818				CC_BY_4_0						http://grbio.org/institution/museum-national-dhistoire-naturelle			MNHN	P			PRESERVED_SPECIMEN				http://coldb.mnhn.fr/catalognumber/mnhn/p/p04667695	P04667695															PRESENT	hb
694810817				CC_BY_4_0						http://grbio.org/institution/museum-national-dhistoire-naturelle			MNHN	P			PRESERVED_SPECIMEN				http://coldb.mnhn.fr/catalognumber/mnhn/p/p04667694	P04667694															PRESENT	hb
694810816				CC_BY_4_0						http://grbio.org/institution/museum-national-dhistoire-naturelle			MNHN	P			PRESERVED_SPECIMEN				http://coldb.mnhn.fr/catalognumber/mnhn/p/p04667692	P04667692															PRESENT	hb
694810815				CC_BY_4_0						http://grbio.org/institution/museum-national-dhistoire-naturelle			MNHN	P			PRESERVED_SPECIMEN				http://coldb.mnhn.fr/catalognumber/mnhn/p/p04667691	P04667691															PRESENT	hb
694810814				CC_BY_4_0						http://grbio.org/institution/museum-national-dhistoire-naturelle			MNHN	P			PRESERVED_SPECIMEN				http://coldb.mnhn.fr/catalognumber/mnhn/p/p04667690	P04667690															PRESENT	hb
694810813				CC_BY_4_0						http://grbio.org/institution/museum-national-dhistoire-naturelle			MNHN	P			PRESERVED_SPECIMEN				http://coldb.mnhn.fr/catalognumber/mnhn/p/p04667689	P04667689															PRESENT	hb
694810812				CC_BY_4_0						http://grbio.org/institution/museum-national-dhistoire-naturelle			MNHN	P			PRESERVED_SPECIMEN				http://coldb.mnhn.fr/catalognumber/mnhn/p/p04667686	P04667686															PRESENT	hb
694810811				CC_BY_4_0						http://grbio.org/institution/museum-national-dhistoire-naturelle			MNHN	P			PRESERVED_SPECIMEN				http://coldb.mnhn.fr/catalognumber/mnhn/p/p04667685	P04667685															PRESENT	hb
694810810				CC_BY_4_0						http://grbio.org/institution/museum-national-dhistoire-naturelle			MNHN	P			PRESERVED_SPECIMEN				http://coldb.mnhn.fr/catalognumber/mnhn/p/p04667683	P04667683															PRESENT	hb
694810809				CC_BY_4_0						http://grbio.org/institution/museum-national-dhistoire-naturelle			MNHN	P			PRESERVED_SPECIMEN				http://coldb.mnhn.fr/catalognumber/mnhn/p/p04667682	P04667682															PRESENT	hb
694810808				CC_BY_4_0						http://grbio.org/institution/museum-national-dhistoire-naturelle			MNHN	P			PRESERVED_SPECIMEN				http://coldb.mnhn.fr/catalognumber/mnhn/p/p04667681	P04667681															PRESENT	hb
694810807				CC_BY_4_0						http://grbio.org/institution/museum-national-dhistoire-naturelle			MNHN	P			PRESERVED_SPECIMEN				http://coldb.mnhn.fr/catalognumber/mnhn/p/p04667680	P04667680															PRESENT	hb
694810806				CC_BY_4_0						http://grbio.org/institution/museum-national-dhistoire-naturelle			MNHN	P			PRESERVED_SPECIMEN				http://coldb.mnhn.fr/catalognumber/mnhn/p/p04667678	P04667678															PRESENT	hb
694810805				CC_BY_4_0						http://grbio.org/institution/museum-national-dhistoire-naturelle			MNHN	P			PRESERVED_SPECIMEN				http://coldb.mnhn.fr/catalognumber/mnhn/p/p04667676	P04667676															PRESENT	hb
694810804				CC_BY_4_0						http://grbio.org/institution/museum-national-dhistoire-naturelle			MNHN	P			PRESERVED_SPECIMEN				http://coldb.mnhn.fr/catalognumber/mnhn/p/p04667675	P04667675															PRESENT	hb
694810803				CC_BY_4_0						http://grbio.org/institution/museum-national-dhistoire-naturelle			MNHN	P			PRESERVED_SPECIMEN				http://coldb.mnhn.fr/catalognumber/mnhn/p/p04667674	P04667674															PRESENT	hb
694810802				CC_BY_4_0						http://grbio.org/institution/museum-national-dhistoire-naturelle			MNHN	P			PRESERVED_SPECIMEN				http://coldb.mnhn.fr/catalognumber/mnhn/p/p04667600	P04667600															PRESENT	hb
694810801				CC_BY_4_0						http://grbio.org/institution/museum-national-dhistoire-naturelle			MNHN	P			PRESERVED_SPECIMEN				http://coldb.mnhn.fr/catalognumber/mnhn/p/p04667597	P04667597															PRESENT	hb
694810800				CC_BY_4_0						http://grbio.org/institution/museum-national-dhistoire-naturelle			MNHN	P			PRESERVED_SPECIMEN				http://coldb.mnhn.fr/catalognumber/mnhn/p/p04667595	P04667595															PRESENT	hb
694810799				CC_BY_4_0						http://grbio.org/institution/museum-national-dhistoire-naturelle			MNHN	P			PRESERVED_SPECIMEN				http://coldb.mnhn.fr/catalognumber/mnhn/p/p04667594	P04667594															PRESENT	hb
694810798				CC_BY_4_0						http://grbio.org/institution/museum-national-dhistoire-naturelle			MNHN	P			PRESERVED_SPECIMEN				http://coldb.mnhn.fr/catalognumber/mnhn/p/p04667593	P04667593															PRESENT	hb
694810797				CC_BY_4_0						http://grbio.org/institution/museum-national-dhistoire-naturelle			MNHN	P			PRESERVED_SPECIMEN				http://coldb.mnhn.fr/catalognumber/mnhn/p/p04667592	P04667592															PRESENT	hb
694810796				CC_BY_4_0						http://grbio.org/institution/museum-national-dhistoire-naturelle			MNHN	P			PRESERVED_SPECIMEN				http://coldb.mnhn.fr/catalognumber/mnhn/p/p04667590	P04667590															PRESENT	hb
694810795				CC_BY_4_0						http://grbio.org/institution/museum-national-dhistoire-naturelle			MNHN	P			PRESERVED_SPECIMEN				http://coldb.mnhn.fr/catalognumber/mnhn/p/p04667589	P04667589															PRESENT	hb
694810794				CC_BY_4_0						http://grbio.org/institution/museum-national-dhistoire-naturelle			MNHN	P			PRESERVED_SPECIMEN				http://coldb.mnhn.fr/catalognumber/mnhn/p/p04667588	P04667588															PRESENT	hb
694810793				CC_BY_4_0						http://grbio.org/institution/museum-national-dhistoire-naturelle			MNHN	P			PRESERVED_SPECIMEN				http://coldb.mnhn.fr/catalognumber/mnhn/p/p04667586	P04667586															PRESENT	hb
694810792				CC_BY_4_0						http://grbio.org/institution/museum-national-dhistoire-naturelle			MNHN	P			PRESERVED_SPECIMEN				http://coldb.mnhn.fr/catalognumber/mnhn/p/p04667583	P04667583															PRESENT	hb
694810791				CC_BY_4_0						http://grbio.org/institution/museum-national-dhistoire-naturelle			MNHN	P			PRESERVED_SPECIMEN				http://coldb.mnhn.fr/catalognumber/mnhn/p/p04667582	P04667582															PRESENT	hb
694810790				CC_BY_4_0						http://grbio.org/institution/museum-national-dhistoire-naturelle			MNHN	P			PRESERVED_SPECIMEN				http://coldb.mnhn.fr/catalognumber/mnhn/p/p04667580	P04667580															PRESENT	hb
694810789				CC_BY_4_0						http://grbio.org/institution/museum-national-dhistoire-naturelle			MNHN	P			PRESERVED_SPECIMEN				http://coldb.mnhn.fr/catalognumber/mnhn/p/p04667579	P04667579															PRESENT	hb
694810788				CC_BY_4_0						http://grbio.org/institution/museum-national-dhistoire-naturelle			MNHN	P			PRESERVED_SPECIMEN				http://coldb.mnhn.fr/catalognumber/mnhn/p/p04667578	P04667578															PRESENT	hb
694810787				CC_BY_4_0						http://grbio.org/institution/museum-national-dhistoire-naturelle			MNHN	P			PRESERVED_SPECIMEN				http://coldb.mnhn.fr/catalognumber/mnhn/p/p04667577	P04667577															PRESENT	hb
694810786				CC_BY_4_0						http://grbio.org/institution/museum-national-dhistoire-naturelle			MNHN	P			PRESERVED_SPECIMEN				http://coldb.mnhn.fr/catalognumber/mnhn/p/p04667575	P04667575															PRESENT	hb
694810785				CC_BY_4_0						http://grbio.org/institution/museum-national-dhistoire-naturelle			MNHN	P			PRESERVED_SPECIMEN				http://coldb.mnhn.fr/catalognumber/mnhn/p/p04667574	P04667574															PRESENT	hb
694810784				CC_BY_4_0						http://grbio.org/institution/museum-national-dhistoire-naturelle			MNHN	P			PRESERVED_SPECIMEN				http://coldb.mnhn.fr/catalognumber/mnhn/p/p04667573	P04667573															PRESENT	hb
694810783				CC_BY_4_0						http://grbio.org/institution/museum-national-dhistoire-naturelle			MNHN	P			PRESERVED_SPECIMEN				http://coldb.mnhn.fr/catalognumber/mnhn/p/p04667570	P04667570															PRESENT	hb
694810782				CC_BY_4_0						http://grbio.org/institution/museum-national-dhistoire-naturelle			MNHN	P			PRESERVED_SPECIMEN				http://coldb.mnhn.fr/catalognumber/mnhn/p/p04667569	P04667569															PRESENT	hb
694810781				CC_BY_4_0						http://grbio.org/institution/museum-national-dhistoire-naturelle			MNHN	P			PRESERVED_SPECIMEN				http://coldb.mnhn.fr/catalognumber/mnhn/p/p04667566	P04667566															PRESENT	hb
694810780				CC_BY_4_0						http://grbio.org/institution/museum-national-dhistoire-naturelle			MNHN	P			PRESERVED_SPECIMEN				http://coldb.mnhn.fr/catalognumber/mnhn/p/p04667564	P04667564															PRESENT	hb
694810779				CC_BY_4_0						http://grbio.org/institution/museum-national-dhistoire-naturelle			MNHN	P			PRESERVED_SPECIMEN				http://coldb.mnhn.fr/catalognumber/mnhn/p/p04667529	P04667529															PRESENT	hb
694810778				CC_BY_4_0						http://grbio.org/institution/museum-national-dhistoire-naturelle			MNHN	P			PRESERVED_SPECIMEN				http://coldb.mnhn.fr/catalognumber/mnhn/p/p04667528	P04667528															PRESENT	hb
694810777				CC_BY_4_0						http://grbio.org/institution/museum-national-dhistoire-naturelle			MNHN	P			PRESERVED_SPECIMEN				http://coldb.mnhn.fr/catalognumber/mnhn/p/p04667527	P04667527															PRESENT	hb
694810776				CC_BY_4_0						http://grbio.org/institution/museum-national-dhistoire-naturelle			MNHN	P			PRESERVED_SPECIMEN				http://coldb.mnhn.fr/catalognumber/mnhn/p/p04667525	P04667525															PRESENT	hb
694810775				CC_BY_4_0						http://grbio.org/institution/museum-national-dhistoire-naturelle			MNHN	P			PRESERVED_SPECIMEN				http://coldb.mnhn.fr/catalognumber/mnhn/p/p04667524	P04667524															PRESENT	hb
694810774				CC_BY_4_0						http://grbio.org/institution/museum-national-dhistoire-naturelle			MNHN	P			PRESERVED_SPECIMEN				http://coldb.mnhn.fr/catalognumber/mnhn/p/p04667522	P04667522															PRESENT	hb
694810715				CC_BY_4_0						http://grbio.org/institution/museum-national-dhistoire-naturelle			MNHN	P			PRESERVED_SPECIMEN				http://coldb.mnhn.fr/catalognumber/mnhn/p/p04667673	P04667673															PRESENT	hb
694810714				CC_BY_4_0						http://grbio.org/institution/museum-national-dhistoire-naturelle			MNHN	P			PRESERVED_SPECIMEN				http://coldb.mnhn.fr/catalognumber/mnhn/p/p04667672	P04667672															PRESENT	hb
694810713				CC_BY_4_0						http://grbio.org/institution/museum-national-dhistoire-naturelle			MNHN	P			PRESERVED_SPECIMEN				http://coldb.mnhn.fr/catalognumber/mnhn/p/p04667670	P04667670															PRESENT	hb
694810712				CC_BY_4_0						http://grbio.org/institution/museum-national-dhistoire-naturelle			MNHN	P			PRESERVED_SPECIMEN				http://coldb.mnhn.fr/catalognumber/mnhn/p/p04667669	P04667669															PRESENT	hb
694810711				CC_BY_4_0						http://grbio.org/institution/museum-national-dhistoire-naturelle			MNHN	P			PRESERVED_SPECIMEN				http://coldb.mnhn.fr/catalognumber/mnhn/p/p04667668	P04667668															PRESENT	hb
694810710				CC_BY_4_0						http://grbio.org/institution/museum-national-dhistoire-naturelle			MNHN	P			PRESERVED_SPECIMEN				http://coldb.mnhn.fr/catalognumber/mnhn/p/p04667666	P04667666															PRESENT	hb
694810709				CC_BY_4_0						http://grbio.org/institution/museum-national-dhistoire-naturelle			MNHN	P			PRESERVED_SPECIMEN				http://coldb.mnhn.fr/catalognumber/mnhn/p/p04667664	P04667664															PRESENT	hb
694810708				CC_BY_4_0						http://grbio.org/institution/museum-national-dhistoire-naturelle			MNHN	P			PRESERVED_SPECIMEN				http://coldb.mnhn.fr/catalognumber/mnhn/p/p04667663	P04667663															PRESENT	hb
694810707				CC_BY_4_0						http://grbio.org/institution/museum-national-dhistoire-naturelle			MNHN	P			PRESERVED_SPECIMEN				http://coldb.mnhn.fr/catalognumber/mnhn/p/p04667662	P04667662															PRESENT	hb
694810706				CC_BY_4_0						http://grbio.org/institution/museum-national-dhistoire-naturelle			MNHN	P			PRESERVED_SPECIMEN				http://coldb.mnhn.fr/catalognumber/mnhn/p/p04667660	P04667660															PRESENT	hb
694810705				CC_BY_4_0						http://grbio.org/institution/museum-national-dhistoire-naturelle			MNHN	P			PRESERVED_SPECIMEN				http://coldb.mnhn.fr/catalognumber/mnhn/p/p04667659	P04667659															PRESENT	hb
694810704				CC_BY_4_0						http://grbio.org/institution/museum-national-dhistoire-naturelle			MNHN	P			PRESERVED_SPECIMEN				http://coldb.mnhn.fr/catalognumber/mnhn/p/p04667658	P04667658															PRESENT	hb
694810703				CC_BY_4_0						http://grbio.org/institution/museum-national-dhistoire-naturelle			MNHN	P			PRESERVED_SPECIMEN				http://coldb.mnhn.fr/catalognumber/mnhn/p/p04667657	P04667657															PRESENT	hb
694764688				CC_BY_4_0						http://grbio.org/institution/museum-national-dhistoire-naturelle			MNHN	P			PRESERVED_SPECIMEN				http://coldb.mnhn.fr/catalognumber/mnhn/p/p05154373	P05154373															PRESENT	hb
694764687				CC_BY_4_0						http://grbio.org/institution/museum-national-dhistoire-naturelle			MNHN	P			PRESERVED_SPECIMEN				http://coldb.mnhn.fr/catalognumber/mnhn/p/p05154370	P05154370															PRESENT	hb
694764686				CC_BY_4_0						http://grbio.org/institution/museum-national-dhistoire-naturelle			MNHN	P			PRESERVED_SPECIMEN				http://coldb.mnhn.fr/catalognumber/mnhn/p/p05154366	P05154366															PRESENT	hb
694764685				CC_BY_4_0						http://grbio.org/institution/museum-national-dhistoire-naturelle			MNHN	P			PRESERVED_SPECIMEN				http://coldb.mnhn.fr/catalognumber/mnhn/p/p05154352	P05154352															PRESENT	hb
694764684				CC_BY_4_0						http://grbio.org/institution/museum-national-dhistoire-naturelle			MNHN	P			PRESERVED_SPECIMEN				http://coldb.mnhn.fr/catalognumber/mnhn/p/p05154340	P05154340															PRESENT	hb
694755979				CC_BY_4_0						http://grbio.org/institution/museum-national-dhistoire-naturelle			MNHN	P			PRESERVED_SPECIMEN				http://coldb.mnhn.fr/catalognumber/mnhn/p/p05154336	P05154336															PRESENT	hb
694755781				CC_BY_4_0						http://grbio.org/institution/museum-national-dhistoire-naturelle			MNHN	P			PRESERVED_SPECIMEN				http://coldb.mnhn.fr/catalognumber/mnhn/p/p05154380	P05154380															PRESENT	hb
694755780				CC_BY_4_0						http://grbio.org/institution/museum-national-dhistoire-naturelle			MNHN	P			PRESERVED_SPECIMEN				http://coldb.mnhn.fr/catalognumber/mnhn/p/p05154377	P05154377															PRESENT	hb
694755779				CC_BY_4_0						http://grbio.org/institution/museum-national-dhistoire-naturelle			MNHN	P			PRESERVED_SPECIMEN				http://coldb.mnhn.fr/catalognumber/mnhn/p/p05154368	P05154368															PRESENT	hb
694755778				CC_BY_4_0						http://grbio.org/institution/museum-national-dhistoire-naturelle			MNHN	P			PRESERVED_SPECIMEN				http://coldb.mnhn.fr/catalognumber/mnhn/p/p05154362	P05154362															PRESENT	hb
694755777				CC_BY_4_0						http://grbio.org/institution/museum-national-dhistoire-naturelle			MNHN	P			PRESERVED_SPECIMEN				http://coldb.mnhn.fr/catalognumber/mnhn/p/p05154358	P05154358															PRESENT	hb
694755776				CC_BY_4_0						http://grbio.org/institution/museum-national-dhistoire-naturelle			MNHN	P			PRESERVED_SPECIMEN				http://coldb.mnhn.fr/catalognumber/mnhn/p/p05154355	P05154355															PRESENT	hb
694755775				CC_BY_4_0						http://grbio.org/institution/museum-national-dhistoire-naturelle			MNHN	P			PRESERVED_SPECIMEN				http://coldb.mnhn.fr/catalognumber/mnhn/p/p05154354	P05154354															PRESENT	hb
694755774				CC_BY_4_0						http://grbio.org/institution/museum-national-dhistoire-naturelle			MNHN	P			PRESERVED_SPECIMEN				http://coldb.mnhn.fr/catalognumber/mnhn/p/p05154353	P05154353															PRESENT	hb
694739314				CC_BY_4_0						http://grbio.org/institution/museum-national-dhistoire-naturelle			MNHN	P			PRESERVED_SPECIMEN				http://coldb.mnhn.fr/catalognumber/mnhn/p/p05154339	P05154339															PRESENT	hb
694739313				CC_BY_4_0						http://grbio.org/institution/museum-national-dhistoire-naturelle			MNHN	P			PRESERVED_SPECIMEN				http://coldb.mnhn.fr/catalognumber/mnhn/p/p05154338	P05154338															PRESENT	hb
694739312				CC_BY_4_0						http://grbio.org/institution/museum-national-dhistoire-naturelle			MNHN	P			PRESERVED_SPECIMEN				http://coldb.mnhn.fr/catalognumber/mnhn/p/p05154337	P05154337															PRESENT	hb
694739311				CC_BY_4_0						http://grbio.org/institution/museum-national-dhistoire-naturelle			MNHN	P			PRESERVED_SPECIMEN				http://coldb.mnhn.fr/catalognumber/mnhn/p/p05154335	P05154335															PRESENT	hb
694739310				CC_BY_4_0						http://grbio.org/institution/museum-national-dhistoire-naturelle			MNHN	P			PRESERVED_SPECIMEN				http://coldb.mnhn.fr/catalognumber/mnhn/p/p05154334	P05154334															PRESENT	hb
694738571				CC_BY_4_0						http://grbio.org/institution/museum-national-dhistoire-naturelle			MNHN	P			PRESERVED_SPECIMEN				http://coldb.mnhn.fr/catalognumber/mnhn/p/p05154658	P05154658															PRESENT	hb
694738457				CC_BY_4_0						http://grbio.org/institution/museum-national-dhistoire-naturelle			MNHN	P			PRESERVED_SPECIMEN				http://coldb.mnhn.fr/catalognumber/mnhn/p/p05154384	P05154384															PRESENT	hb
694738456				CC_BY_4_0						http://grbio.org/institution/museum-national-dhistoire-naturelle			MNHN	P			PRESERVED_SPECIMEN				http://coldb.mnhn.fr/catalognumber/mnhn/p/p05154383	P05154383															PRESENT	hb
694738455				CC_BY_4_0						http://grbio.org/institution/museum-national-dhistoire-naturelle			MNHN	P			PRESERVED_SPECIMEN				http://coldb.mnhn.fr/catalognumber/mnhn/p/p05154382	P05154382															PRESENT	hb
694738454				CC_BY_4_0						http://grbio.org/institution/museum-national-dhistoire-naturelle			MNHN	P			PRESERVED_SPECIMEN				http://coldb.mnhn.fr/catalognumber/mnhn/p/p05154381	P05154381															PRESENT	hb
694738453				CC_BY_4_0						http://grbio.org/institution/museum-national-dhistoire-naturelle			MNHN	P			PRESERVED_SPECIMEN				http://coldb.mnhn.fr/catalognumber/mnhn/p/p05154379	P05154379															PRESENT	hb
694738452				CC_BY_4_0						http://grbio.org/institution/museum-national-dhistoire-naturelle			MNHN	P			PRESERVED_SPECIMEN				http://coldb.mnhn.fr/catalognumber/mnhn/p/p05154378	P05154378															PRESENT	hb
694738451				CC_BY_4_0						http://grbio.org/institution/museum-national-dhistoire-naturelle			MNHN	P			PRESERVED_SPECIMEN				http://coldb.mnhn.fr/catalognumber/mnhn/p/p05154376	P05154376															PRESENT	hb
694738450				CC_BY_4_0						http://grbio.org/institution/museum-national-dhistoire-naturelle			MNHN	P			PRESERVED_SPECIMEN				http://coldb.mnhn.fr/catalognumber/mnhn/p/p05154375	P05154375															PRESENT	hb
694738314				CC_BY_4_0						http://grbio.org/institution/museum-national-dhistoire-naturelle			MNHN	P			PRESERVED_SPECIMEN				http://coldb.mnhn.fr/catalognumber/mnhn/p/p05154374	P05154374															PRESENT	hb
694738313				CC_BY_4_0						http://grbio.org/institution/museum-national-dhistoire-naturelle			MNHN	P			PRESERVED_SPECIMEN				http://coldb.mnhn.fr/catalognumber/mnhn/p/p05154372	P05154372															PRESENT	hb
694738312				CC_BY_4_0						http://grbio.org/institution/museum-national-dhistoire-naturelle			MNHN	P			PRESERVED_SPECIMEN				http://coldb.mnhn.fr/catalognumber/mnhn/p/p05154371	P05154371															PRESENT	hb
694738311				CC_BY_4_0						http://grbio.org/institution/museum-national-dhistoire-naturelle			MNHN	P			PRESERVED_SPECIMEN				http://coldb.mnhn.fr/catalognumber/mnhn/p/p05154369	P05154369															PRESENT	hb
694738310				CC_BY_4_0						http://grbio.org/institution/museum-national-dhistoire-naturelle			MNHN	P			PRESERVED_SPECIMEN				http://coldb.mnhn.fr/catalognumber/mnhn/p/p05154367	P05154367															PRESENT	hb
694738309				CC_BY_4_0						http://grbio.org/institution/museum-national-dhistoire-naturelle			MNHN	P			PRESERVED_SPECIMEN				http://coldb.mnhn.fr/catalognumber/mnhn/p/p05154365	P05154365															PRESENT	hb
694738308				CC_BY_4_0						http://grbio.org/institution/museum-national-dhistoire-naturelle			MNHN	P			PRESERVED_SPECIMEN				http://coldb.mnhn.fr/catalognumber/mnhn/p/p05154364	P05154364															PRESENT	hb
694738307				CC_BY_4_0						http://grbio.org/institution/museum-national-dhistoire-naturelle			MNHN	P			PRESERVED_SPECIMEN				http://coldb.mnhn.fr/catalognumber/mnhn/p/p05154363	P05154363															PRESENT	hb
694738306				CC_BY_4_0						http://grbio.org/institution/museum-national-dhistoire-naturelle			MNHN	P			PRESERVED_SPECIMEN				http://coldb.mnhn.fr/catalognumber/mnhn/p/p05154361	P05154361															PRESENT	hb
694738305				CC_BY_4_0						http://grbio.org/institution/museum-national-dhistoire-naturelle			MNHN	P			PRESERVED_SPECIMEN				http://coldb.mnhn.fr/catalognumber/mnhn/p/p05154360	P05154360															PRESENT	hb
694738304				CC_BY_4_0						http://grbio.org/institution/museum-national-dhistoire-naturelle			MNHN	P			PRESERVED_SPECIMEN				http://coldb.mnhn.fr/catalognumber/mnhn/p/p05154359	P05154359															PRESENT	hb
694738303				CC_BY_4_0						http://grbio.org/institution/museum-national-dhistoire-naturelle			MNHN	P			PRESERVED_SPECIMEN				http://coldb.mnhn.fr/catalognumber/mnhn/p/p05154357	P05154357															PRESENT	hb
694738302				CC_BY_4_0						http://grbio.org/institution/museum-national-dhistoire-naturelle			MNHN	P			PRESERVED_SPECIMEN				http://coldb.mnhn.fr/catalognumber/mnhn/p/p05154356	P05154356															PRESENT	hb
694738301				CC_BY_4_0						http://grbio.org/institution/museum-national-dhistoire-naturelle			MNHN	P			PRESERVED_SPECIMEN				http://coldb.mnhn.fr/catalognumber/mnhn/p/p05154351	P05154351															PRESENT	hb
694738300				CC_BY_4_0						http://grbio.org/institution/museum-national-dhistoire-naturelle			MNHN	P			PRESERVED_SPECIMEN				http://coldb.mnhn.fr/catalognumber/mnhn/p/p05154350	P05154350															PRESENT	hb
694738299				CC_BY_4_0						http://grbio.org/institution/museum-national-dhistoire-naturelle			MNHN	P			PRESERVED_SPECIMEN				http://coldb.mnhn.fr/catalognumber/mnhn/p/p05154349	P05154349															PRESENT	hb
694738298				CC_BY_4_0						http://grbio.org/institution/museum-national-dhistoire-naturelle			MNHN	P			PRESERVED_SPECIMEN				http://coldb.mnhn.fr/catalognumber/mnhn/p/p05154348	P05154348															PRESENT	hb
694738297				CC_BY_4_0						http://grbio.org/institution/museum-national-dhistoire-naturelle			MNHN	P			PRESERVED_SPECIMEN				http://coldb.mnhn.fr/catalognumber/mnhn/p/p05154347	P05154347															PRESENT	hb
694738296				CC_BY_4_0						http://grbio.org/institution/museum-national-dhistoire-naturelle			MNHN	P			PRESERVED_SPECIMEN				http://coldb.mnhn.fr/catalognumber/mnhn/p/p05154346	P05154346															PRESENT	hb
694738295				CC_BY_4_0						http://grbio.org/institution/museum-national-dhistoire-naturelle			MNHN	P			PRESERVED_SPECIMEN				http://coldb.mnhn.fr/catalognumber/mnhn/p/p05154345	P05154345															PRESENT	hb
694738294				CC_BY_4_0						http://grbio.org/institution/museum-national-dhistoire-naturelle			MNHN	P			PRESERVED_SPECIMEN				http://coldb.mnhn.fr/catalognumber/mnhn/p/p05154344	P05154344															PRESENT	hb
694738293				CC_BY_4_0						http://grbio.org/institution/museum-national-dhistoire-naturelle			MNHN	P			PRESERVED_SPECIMEN				http://coldb.mnhn.fr/catalognumber/mnhn/p/p05154343	P05154343															PRESENT	hb
694738292				CC_BY_4_0						http://grbio.org/institution/museum-national-dhistoire-naturelle			MNHN	P			PRESERVED_SPECIMEN				http://coldb.mnhn.fr/catalognumber/mnhn/p/p05154342	P05154342															PRESENT	hb
694738291				CC_BY_4_0						http://grbio.org/institution/museum-national-dhistoire-naturelle			MNHN	P			PRESERVED_SPECIMEN				http://coldb.mnhn.fr/catalognumber/mnhn/p/p05154341	P05154341															PRESENT	hb
694389136				CC_BY_4_0						http://grbio.org/institution/museum-national-dhistoire-naturelle			MNHN	P			PRESERVED_SPECIMEN				http://coldb.mnhn.fr/catalognumber/mnhn/p/p04667677	P04667677															PRESENT	hb
684328001				CC0_1_0									B	Herbarium Berolinense			PRESERVED_SPECIMEN				https://herbarium.bgbm.org/object/BW14392010	B -W 14392 -01 0															PRESENT
684328000				CC0_1_0									B	Herbarium Berolinense			PRESERVED_SPECIMEN				https://herbarium.bgbm.org/object/BW14390010	B -W 14390 -01 0															PRESENT
575320676				CC0_1_0					PhysicalObject		http://biocol.org/urn:lsid:biocol.org:col:15670		E	E	Royal Botanic Garden Edinburgh Herbarium	E	PRESERVED_SPECIMEN				https://data.rbge.org.uk/herb/E00114593	E00114593	7024														PRESENT
47777862				CC_BY_4_0									AU	AAU			PRESERVED_SPECIMEN				AAU-Herbarium-A.Goudiaby239	A.Goudiaby239		A. Goudiaby													PRESENT
47777861				CC_BY_4_0									AU	AAU			PRESERVED_SPECIMEN				AAU-Herbarium-A.Goudiaby208	A.Goudiaby208		A. Goudiaby													PRESENT
4430966818				CC_BY_NC_4_0	2023-10-12T09:19:43Z		https://www.inaturalist.org/observations/187091295	Bart Wursten					iNaturalist	Observations	iNaturalist research-grade observations		HUMAN_OBSERVATION				https://www.inaturalist.org/observations/187091295	187091295		Bart Wursten							no evidence of flowering						PRESENT
4426848680		https://www.thebhs.org/publications/the-herpetological-bulletin/issue-number-139-spring-2017/992-05-natural-history-observations-of-a-dwarf-green-gecko-i-lygodactylus-conraui-i-in-rivers-state-southern-nigeria		CC_BY_NC_4_0				British Herpetological Society							International records of herpetofauna published in the British Herpetological Society's journals		MATERIAL_CITATION				bhs:global:384			Nioking Amadi;Godfrey C. Akani;Nwabueze Ebere;Gbeneme Asumene;Fabio Petrozzi;Edem A. Eniang;Luca Luiselli						Adult							PRESENT
4424601797				CC_BY_NC_4_0	2023-10-05T10:03:45Z		https://www.inaturalist.org/observations/177470185	restauration					iNaturalist	Observations	iNaturalist research-grade observations		HUMAN_OBSERVATION				https://www.inaturalist.org/observations/177470185	177470185		restauration													PRESENT								T2/D27/SD/O/74
4424497729				CC_BY_NC_4_0	2023-10-05T10:04:28Z		https://www.inaturalist.org/observations/177468297	restauration					iNaturalist	Observations	iNaturalist research-grade observations		HUMAN_OBSERVATION				https://www.inaturalist.org/observations/177468297	177468297		restauration													PRESENT								T2/D27/SD/O/29
4424461734				CC_BY_NC_4_0	2023-10-05T10:05:04Z		https://www.inaturalist.org/observations/177468264	restauration					iNaturalist	Observations	iNaturalist research-grade observations		HUMAN_OBSERVATION				https://www.inaturalist.org/observations/177468264	177468264		restauration													PRESENT								T2/D27/SD/O/30
4424461733				CC_BY_NC_4_0	2023-10-05T10:05:50Z		https://www.inaturalist.org/observations/177468165	restauration					iNaturalist	Observations	iNaturalist research-grade observations		HUMAN_OBSERVATION				https://www.inaturalist.org/observations/177468165	177468165		restauration													PRESENT								T2/D27/SD/O/33
4424439828				CC_BY_NC_4_0	2023-10-05T10:05:19Z		https://www.inaturalist.org/observations/177468237	restauration					iNaturalist	Observations	iNaturalist research-grade observations		HUMAN_OBSERVATION				https://www.inaturalist.org/observations/177468237	177468237		restauration													PRESENT								T2/D27/SD/O/31
4424421497				CC_BY_NC_4_0	2023-10-05T09:54:42Z		https://www.inaturalist.org/observations/178330418	restauration					iNaturalist	Observations	iNaturalist research-grade observations		HUMAN_OBSERVATION				https://www.inaturalist.org/observations/178330418	178330418		restauration													PRESENT								T5/D27/Tr/O/259
4424419802				CC_BY_NC_4_0	2023-10-05T10:02:50Z		https://www.inaturalist.org/observations/177470280	restauration					iNaturalist	Observations	iNaturalist research-grade observations		HUMAN_OBSERVATION				https://www.inaturalist.org/observations/177470280	177470280		restauration													PRESENT								T2/D27/SD/O/72
4424407487				CC_BY_NC_4_0	2023-10-05T10:01:59Z		https://www.inaturalist.org/observations/177470449	restauration					iNaturalist	Observations	iNaturalist research-grade observations		HUMAN_OBSERVATION				https://www.inaturalist.org/observations/177470449	177470449		restauration													PRESENT								T2/D27/SD/O/67
4424386584				CC_BY_NC_4_0	2023-10-05T10:03:39Z		https://www.inaturalist.org/observations/177470237	restauration					iNaturalist	Observations	iNaturalist research-grade observations		HUMAN_OBSERVATION				https://www.inaturalist.org/observations/177470237	177470237		restauration													PRESENT								T2/D27/SD/O/73
4424370765				CC_BY_NC_4_0	2023-10-05T10:06:21Z		https://www.inaturalist.org/observations/177468101	restauration					iNaturalist	Observations	iNaturalist research-grade observations		HUMAN_OBSERVATION				https://www.inaturalist.org/observations/177468101	177468101		restauration													PRESENT								T2/D27/SD/O/35
4424249700				CC_BY_NC_4_0	2023-10-05T10:06:43Z		https://www.inaturalist.org/observations/177468010	restauration					iNaturalist	Observations	iNaturalist research-grade observations		HUMAN_OBSERVATION				https://www.inaturalist.org/observations/177468010	177468010		restauration													PRESENT								T2/D27/SD/O/37
4424226793				CC_BY_NC_4_0	2023-10-05T10:04:20Z		https://www.inaturalist.org/observations/177468345	restauration					iNaturalist	Observations	iNaturalist research-grade observations		HUMAN_OBSERVATION				https://www.inaturalist.org/observations/177468345	177468345		restauration													PRESENT								T2/D27/SD/O/28
4424206767				CC_BY_NC_4_0	2023-10-05T10:07:42Z		https://www.inaturalist.org/observations/177467890	restauration					iNaturalist	Observations	iNaturalist research-grade observations		HUMAN_OBSERVATION				https://www.inaturalist.org/observations/177467890	177467890		restauration													PRESENT								T2/D27/SD/O/40
4424200517				CC_BY_NC_4_0	2023-10-05T10:07:28Z		https://www.inaturalist.org/observations/177467918	restauration					iNaturalist	Observations	iNaturalist research-grade observations		HUMAN_OBSERVATION				https://www.inaturalist.org/observations/177467918	177467918		restauration													PRESENT								T2/D27/SD/O/39
4424194724				CC_BY_NC_4_0	2023-10-05T10:01:38Z		https://www.inaturalist.org/observations/177470495	restauration					iNaturalist	Observations	iNaturalist research-grade observations		HUMAN_OBSERVATION				https://www.inaturalist.org/observations/177470495	177470495		restauration													PRESENT								T2/D27/SD/O/66
4424181831				CC_BY_NC_4_0	2023-10-05T10:06:35Z		https://www.inaturalist.org/observations/177468058	restauration					iNaturalist	Observations	iNaturalist research-grade observations		HUMAN_OBSERVATION				https://www.inaturalist.org/observations/177468058	177468058		restauration													PRESENT								T2/D27/SD/O/36
4424132694				CC_BY_NC_4_0	2023-10-05T10:02:33Z		https://www.inaturalist.org/observations/177470342	restauration					iNaturalist	Observations	iNaturalist research-grade observations		HUMAN_OBSERVATION				https://www.inaturalist.org/observations/177470342	177470342		restauration													PRESENT								T2/D27/SD/O/71
4424128817				CC_BY_NC_4_0	2023-10-05T10:05:31Z		https://www.inaturalist.org/observations/177468215	restauration					iNaturalist	Observations	iNaturalist research-grade observations		HUMAN_OBSERVATION				https://www.inaturalist.org/observations/177468215	177468215		restauration													PRESENT								T2/D27/SD/O/32
4424123805				CC_BY_NC_4_0	2023-10-05T09:55:04Z		https://www.inaturalist.org/observations/178330221	restauration					iNaturalist	Observations	iNaturalist research-grade observations		HUMAN_OBSERVATION				https://www.inaturalist.org/observations/178330221	178330221		restauration													PRESENT								T5/D27/Tr/O/256
4424111754				CC_BY_NC_4_0	2023-10-05T10:03:57Z		https://www.inaturalist.org/observations/177468364	restauration					iNaturalist	Observations	iNaturalist research-grade observations		HUMAN_OBSERVATION				https://www.inaturalist.org/observations/177468364	177468364		restauration													PRESENT								T2/D27/SD/O/27
4424099674				CC_BY_NC_4_0	2023-10-05T10:06:00Z		https://www.inaturalist.org/observations/177468141	restauration					iNaturalist	Observations	iNaturalist research-grade observations		HUMAN_OBSERVATION				https://www.inaturalist.org/observations/177468141	177468141		restauration													PRESENT								T2/D27/SD/O/34
4424096686				CC_BY_NC_4_0	2023-10-05T10:06:53Z		https://www.inaturalist.org/observations/177467978	restauration					iNaturalist	Observations	iNaturalist research-grade observations		HUMAN_OBSERVATION				https://www.inaturalist.org/observations/177467978	177467978		restauration													PRESENT								T2/D27/SD/O/38
4424079732				CC_BY_NC_4_0	2023-10-05T10:02:20Z		https://www.inaturalist.org/observations/177470386	restauration					iNaturalist	Observations	iNaturalist research-grade observations		HUMAN_OBSERVATION				https://www.inaturalist.org/observations/177470386	177470386		restauration													PRESENT								T2/D27/SD/O/68
4420814803				CC_BY_NC_4_0	2023-10-01T04:47:09Z		https://www.inaturalist.org/observations/185680914	bean_ar					iNaturalist	Observations	iNaturalist research-grade observations		HUMAN_OBSERVATION				https://www.inaturalist.org/observations/185680914	185680914		bean_ar													PRESENT								Tree 8 metres high in rainforest. Locally common.
4420612227				CC0_1_0					PhysicalObject		http://biocol.org/urn:lsid:biocol.org:col:15670		E	E	Royal Botanic Garden Edinburgh Herbarium	E	PRESERVED_SPECIMEN				https://data.rbge.org.uk/herb/E01182456	E01182456															PRESENT
4420612226				CC0_1_0					PhysicalObject		http://biocol.org/urn:lsid:biocol.org:col:15670		E	E	Royal Botanic Garden Edinburgh Herbarium	E	PRESERVED_SPECIMEN				https://data.rbge.org.uk/herb/E01182445	E01182445															PRESENT
4420612225				CC0_1_0					PhysicalObject		http://biocol.org/urn:lsid:biocol.org:col:15670		E	E	Royal Botanic Garden Edinburgh Herbarium	E	PRESERVED_SPECIMEN				https://data.rbge.org.uk/herb/E01182434	E01182434															PRESENT
4420606231				CC0_1_0					PhysicalObject		http://biocol.org/urn:lsid:biocol.org:col:15670		E	E	Royal Botanic Garden Edinburgh Herbarium	E	PRESERVED_SPECIMEN				https://data.rbge.org.uk/herb/E01182453	E01182453															PRESENT
4420606230				CC0_1_0					PhysicalObject		http://biocol.org/urn:lsid:biocol.org:col:15670		E	E	Royal Botanic Garden Edinburgh Herbarium	E	PRESERVED_SPECIMEN				https://data.rbge.org.uk/herb/E01182442	E01182442															PRESENT
4420606229				CC0_1_0					PhysicalObject		http://biocol.org/urn:lsid:biocol.org:col:15670		E	E	Royal Botanic Garden Edinburgh Herbarium	E	PRESERVED_SPECIMEN				https://data.rbge.org.uk/herb/E01182439	E01182439															PRESENT
4420606228				CC0_1_0					PhysicalObject		http://biocol.org/urn:lsid:biocol.org:col:15670		E	E	Royal Botanic Garden Edinburgh Herbarium	E	PRESERVED_SPECIMEN				https://data.rbge.org.uk/herb/E01182431	E01182431															PRESENT
4420604223				CC0_1_0					PhysicalObject		http://biocol.org/urn:lsid:biocol.org:col:15670		E	E	Royal Botanic Garden Edinburgh Herbarium	E	PRESERVED_SPECIMEN				https://data.rbge.org.uk/herb/E01182452	E01182452															PRESENT
4420604222				CC0_1_0					PhysicalObject		http://biocol.org/urn:lsid:biocol.org:col:15670		E	E	Royal Botanic Garden Edinburgh Herbarium	E	PRESERVED_SPECIMEN				https://data.rbge.org.uk/herb/E01182449	E01182449															PRESENT
4420604221				CC0_1_0					PhysicalObject		http://biocol.org/urn:lsid:biocol.org:col:15670		E	E	Royal Botanic Garden Edinburgh Herbarium	E	PRESERVED_SPECIMEN				https://data.rbge.org.uk/herb/E01182441	E01182441															PRESENT
4420604220				CC0_1_0					PhysicalObject		http://biocol.org/urn:lsid:biocol.org:col:15670		E	E	Royal Botanic Garden Edinburgh Herbarium	E	PRESERVED_SPECIMEN				https://data.rbge.org.uk/herb/E01182438	E01182438															PRESENT
4420501231				CC0_1_0					PhysicalObject		http://biocol.org/urn:lsid:biocol.org:col:15670		E	E	Royal Botanic Garden Edinburgh Herbarium	E	PRESERVED_SPECIMEN				https://data.rbge.org.uk/herb/E01182455	E01182455															PRESENT
4420501230				CC0_1_0					PhysicalObject		http://biocol.org/urn:lsid:biocol.org:col:15670		E	E	Royal Botanic Garden Edinburgh Herbarium	E	PRESERVED_SPECIMEN				https://data.rbge.org.uk/herb/E01182444	E01182444															PRESENT
4420501229				CC0_1_0					PhysicalObject		http://biocol.org/urn:lsid:biocol.org:col:15670		E	E	Royal Botanic Garden Edinburgh Herbarium	E	PRESERVED_SPECIMEN				https://data.rbge.org.uk/herb/E01182433	E01182433															PRESENT
4420500232				CC0_1_0					PhysicalObject		http://biocol.org/urn:lsid:biocol.org:col:15670		E	E	Royal Botanic Garden Edinburgh Herbarium	E	PRESERVED_SPECIMEN				https://data.rbge.org.uk/herb/E01182451	E01182451															PRESENT
4420500231				CC0_1_0					PhysicalObject		http://biocol.org/urn:lsid:biocol.org:col:15670		E	E	Royal Botanic Garden Edinburgh Herbarium	E	PRESERVED_SPECIMEN				https://data.rbge.org.uk/herb/E01182448	E01182448															PRESENT
4420500230				CC0_1_0					PhysicalObject		http://biocol.org/urn:lsid:biocol.org:col:15670		E	E	Royal Botanic Garden Edinburgh Herbarium	E	PRESERVED_SPECIMEN				https://data.rbge.org.uk/herb/E01182440	E01182440															PRESENT
4420500229				CC0_1_0					PhysicalObject		http://biocol.org/urn:lsid:biocol.org:col:15670		E	E	Royal Botanic Garden Edinburgh Herbarium	E	PRESERVED_SPECIMEN				https://data.rbge.org.uk/herb/E01182437	E01182437															PRESENT
4420496235				CC0_1_0					PhysicalObject		http://biocol.org/urn:lsid:biocol.org:col:15670		E	E	Royal Botanic Garden Edinburgh Herbarium	E	PRESERVED_SPECIMEN				https://data.rbge.org.uk/herb/E01182450	E01182450															PRESENT
4420496234				CC0_1_0					PhysicalObject		http://biocol.org/urn:lsid:biocol.org:col:15670		E	E	Royal Botanic Garden Edinburgh Herbarium	E	PRESERVED_SPECIMEN				https://data.rbge.org.uk/herb/E01182447	E01182447															PRESENT
4420496233				CC0_1_0					PhysicalObject		http://biocol.org/urn:lsid:biocol.org:col:15670		E	E	Royal Botanic Garden Edinburgh Herbarium	E	PRESERVED_SPECIMEN				https://data.rbge.org.uk/herb/E01182436	E01182436															PRESENT
4420495223				CC0_1_0					PhysicalObject		http://biocol.org/urn:lsid:biocol.org:col:15670		E	E	Royal Botanic Garden Edinburgh Herbarium	E	PRESERVED_SPECIMEN				https://data.rbge.org.uk/herb/E01182454	E01182454															PRESENT
4420495222				CC0_1_0					PhysicalObject		http://biocol.org/urn:lsid:biocol.org:col:15670		E	E	Royal Botanic Garden Edinburgh Herbarium	E	PRESERVED_SPECIMEN				https://data.rbge.org.uk/herb/E01182443	E01182443															PRESENT
4420495221				CC0_1_0					PhysicalObject		http://biocol.org/urn:lsid:biocol.org:col:15670		E	E	Royal Botanic Garden Edinburgh Herbarium	E	PRESERVED_SPECIMEN				https://data.rbge.org.uk/herb/E01182432	E01182432															PRESENT
4420494226				CC0_1_0					PhysicalObject		http://biocol.org/urn:lsid:biocol.org:col:15670		E	E	Royal Botanic Garden Edinburgh Herbarium	E	PRESERVED_SPECIMEN				https://data.rbge.org.uk/herb/E01182457	E01182457															PRESENT
4420494225				CC0_1_0					PhysicalObject		http://biocol.org/urn:lsid:biocol.org:col:15670		E	E	Royal Botanic Garden Edinburgh Herbarium	E	PRESERVED_SPECIMEN				https://data.rbge.org.uk/herb/E01182446	E01182446															PRESENT
4420494224				CC0_1_0					PhysicalObject		http://biocol.org/urn:lsid:biocol.org:col:15670		E	E	Royal Botanic Garden Edinburgh Herbarium	E	PRESERVED_SPECIMEN				https://data.rbge.org.uk/herb/E01182435	E01182435															PRESENT
4419949304	http://creativecommons.org/licenses/by-nc/4.0/legalcode	Herbarium of the Faculty of Sciences and Technology, University of Coimbra, Portugal (COI). Specimen COI00108008. http://coicatalogue.uc.pt/specimen/COI00108008		CC_BY_NC_4_0	2023-09-27T11:34:46Z		http://coicatalogue.uc.pt/specimen/COI00108008		PhysicalObject	43398bf6-d23a-44f6-8425-bf40bc368630			COI	COI	COI - Herbarium of University of Coimbra		PRESERVED_SPECIMEN				d3c0af5e-bcbd-49cf-9e14-d7900ea82986	http://coicatalogue.uc.pt/specimen/COI00108008	7	Henriques, JÃºlio Augusto	http://www.wikidata.org/entity/Q5396407						flowering						PRESENT	Sheet:1
4419949302	http://creativecommons.org/licenses/by-nc/4.0/legalcode	Herbarium of the Faculty of Sciences and Technology, University of Coimbra, Portugal (COI). Specimen COI00108009. http://coicatalogue.uc.pt/specimen/COI00108009		CC_BY_NC_4_0	2023-09-27T11:34:59Z		http://coicatalogue.uc.pt/specimen/COI00108009		PhysicalObject	43398bf6-d23a-44f6-8425-bf40bc368630			COI	COI	COI - Herbarium of University of Coimbra		PRESERVED_SPECIMEN				77f4325b-f8af-4ca7-a452-3d65bcd9a965	http://coicatalogue.uc.pt/specimen/COI00108009	16	Henriques, JÃºlio Augusto	http://www.wikidata.org/entity/Q5396407						fruiting						PRESENT	Sheet:1
4416877953				CC_BY_NC_4_0	2023-09-27T08:45:25Z		https://www.inaturalist.org/observations/184832030	Andry.A.R					iNaturalist	Observations	iNaturalist research-grade observations		HUMAN_OBSERVATION				https://www.inaturalist.org/observations/184832030	184832030		Andry.A.R													PRESENT
4416229324		http://www.tropicos.org/Specimen/103381008		CC_BY_4_0				Missouri Botanical Garden	PhysicalObject		http://biocol.org/urn:lsid:biocol.org:col:15859		MO	Tropicos	Tropicos	MOBOT	PRESERVED_SPECIMEN				urn:catalog:MO:Tropicos:103381008	103381008	BarberÃ¡ 3418	Patricia BarberÃ¡;Eric Akouangou;J. Boussengui-Nongo;Jean de Dieu Kaparidi;Jacques BiÃ© Mba;Christ Dibouba Kombil		2											PRESENT
4416187371		http://www.tropicos.org/Specimen/103381007		CC_BY_4_0				Missouri Botanical Garden	PhysicalObject		http://biocol.org/urn:lsid:biocol.org:col:15859		LBV	Tropicos	Tropicos	MOBOT	PRESERVED_SPECIMEN				urn:catalog:MO:Tropicos:103381007	103381007	BarberÃ¡ 3418	Patricia BarberÃ¡;Eric Akouangou;J. Boussengui-Nongo;Jean de Dieu Kaparidi;Jacques BiÃ© Mba;Christ Dibouba Kombil		2											PRESENT
4407068124				CC_BY_NC_4_0	2023-09-04T05:01:29Z		https://www.inaturalist.org/observations/181025635	restauration					iNaturalist	Observations	iNaturalist research-grade observations		HUMAN_OBSERVATION				https://www.inaturalist.org/observations/181025635	181025635		restauration													PRESENT								T8/Polybag/SD/G/775
4401874393		http://www.tropicos.org/Specimen/103364017		CC_BY_4_0				Missouri Botanical Garden	PhysicalObject		http://biocol.org/urn:lsid:biocol.org:col:15859		MO	Tropicos	Tropicos	MOBOT	PRESERVED_SPECIMEN				urn:catalog:MO:Tropicos:103364017	103364017	Gervais 460	Gervais		5											PRESENT
4401848350		http://www.tropicos.org/Specimen/103364018		CC_BY_4_0				Missouri Botanical Garden	PhysicalObject		http://biocol.org/urn:lsid:biocol.org:col:15859		P	Tropicos	Tropicos	MOBOT	PRESERVED_SPECIMEN				urn:catalog:MO:Tropicos:103364018	103364018	Gervais 460	Gervais		5											PRESENT
4401839348		http://www.tropicos.org/Specimen/103364016		CC_BY_4_0				Missouri Botanical Garden	PhysicalObject		http://biocol.org/urn:lsid:biocol.org:col:15859		TAN	Tropicos	Tropicos	MOBOT	PRESERVED_SPECIMEN				urn:catalog:MO:Tropicos:103364016	103364016	Gervais 460	Gervais		5											PRESENT
4401249319			en	CC0_1_0	2023-08-22T16:11:28Z				Physical Object	http://grscicoll.org/institution/california-academy-sciences	http://grscicoll.org/institutional-collection/botany		CAS	BOT-BC			PRESERVED_SPECIMEN				urn:catalog:CAS:BOT-BC:702129	702129	11483	Daniel, T. F.; Shevock, J.; Soares, E.													PRESENT								Tree to 8 m; corolla white; scarce in grassy clearing.
4400465685				CC_BY_NC_4_0	2023-08-18T07:59:29Z		https://www.inaturalist.org/observations/178488837	restauration					iNaturalist	Observations	iNaturalist research-grade observations		HUMAN_OBSERVATION				https://www.inaturalist.org/observations/178488837	178488837		restauration													PRESENT								T11/D40/SD+VAM/O/485
4400460994				CC_BY_NC_4_0	2023-08-18T08:16:25Z		https://www.inaturalist.org/observations/178325664	restauration					iNaturalist	Observations	iNaturalist research-grade observations		HUMAN_OBSERVATION				https://www.inaturalist.org/observations/178325664	178325664		restauration													PRESENT								T2/D27/SD/G/118
4400460993				CC_BY_NC_4_0	2023-08-18T08:16:32Z		https://www.inaturalist.org/observations/178325565	restauration					iNaturalist	Observations	iNaturalist research-grade observations		HUMAN_OBSERVATION				https://www.inaturalist.org/observations/178325565	178325565		restauration													PRESENT								T2/D27/SD/G/115
4400460992				CC_BY_NC_4_0	2023-08-18T08:16:57Z		https://www.inaturalist.org/observations/178324971	restauration					iNaturalist	Observations	iNaturalist research-grade observations		HUMAN_OBSERVATION				https://www.inaturalist.org/observations/178324971	178324971		restauration													PRESENT								T2/D27/SD/G/106
4400457022				CC_BY_NC_4_0	2023-08-18T08:14:56Z		https://www.inaturalist.org/observations/178328017	restauration					iNaturalist	Observations	iNaturalist research-grade observations		HUMAN_OBSERVATION				https://www.inaturalist.org/observations/178328017	178328017		restauration													PRESENT								T4/D40/SD/G/190
4400447879				CC_BY_NC_4_0	2023-08-18T08:16:06Z		https://www.inaturalist.org/observations/178326528	restauration					iNaturalist	Observations	iNaturalist research-grade observations		HUMAN_OBSERVATION				https://www.inaturalist.org/observations/178326528	178326528		restauration													PRESENT								T3/D40/SD/O/125
4400446785				CC_BY_NC_4_0	2023-08-18T08:04:04Z		https://www.inaturalist.org/observations/178333547	restauration					iNaturalist	Observations	iNaturalist research-grade observations		HUMAN_OBSERVATION				https://www.inaturalist.org/observations/178333547	178333547		restauration													PRESENT								T9/D27/SD+VAM/O/370
4400446783				CC_BY_NC_4_0	2023-08-18T08:06:46Z		https://www.inaturalist.org/observations/178331864	restauration					iNaturalist	Observations	iNaturalist research-grade observations		HUMAN_OBSERVATION				https://www.inaturalist.org/observations/178331864	178331864		restauration													PRESENT								T6/D27/Tr/G/317
4400444970				CC_BY_NC_4_0	2023-08-18T08:16:34Z		https://www.inaturalist.org/observations/178325541	restauration					iNaturalist	Observations	iNaturalist research-grade observations		HUMAN_OBSERVATION				https://www.inaturalist.org/observations/178325541	178325541		restauration													PRESENT								T2/D27/SD/G/114
4400435948				CC_BY_NC_4_0	2023-08-18T08:03:31Z		https://www.inaturalist.org/observations/178334841	restauration					iNaturalist	Observations	iNaturalist research-grade observations		HUMAN_OBSERVATION				https://www.inaturalist.org/observations/178334841	178334841		restauration													PRESENT								T10/D27/SD+VAM/G/426
4400426502				CC_BY_NC_4_0	2023-08-18T07:58:43Z		https://www.inaturalist.org/observations/178490525	restauration					iNaturalist	Observations	iNaturalist research-grade observations		HUMAN_OBSERVATION				https://www.inaturalist.org/observations/178490525	178490525		restauration													PRESENT								T12/D40/SD+VAM/G/546
4400425969				CC_BY_NC_4_0	2023-08-18T08:01:13Z		https://www.inaturalist.org/observations/178334882	restauration					iNaturalist	Observations	iNaturalist research-grade observations		HUMAN_OBSERVATION				https://www.inaturalist.org/observations/178334882	178334882		restauration													PRESENT								T10/D27/SD+VAM/G/427
4400425968				CC_BY_NC_4_0	2023-08-18T08:03:54Z		https://www.inaturalist.org/observations/178333991	restauration					iNaturalist	Observations	iNaturalist research-grade observations		HUMAN_OBSERVATION				https://www.inaturalist.org/observations/178333991	178333991		restauration													PRESENT								T9/D27/SD+VAM/O/374
4400425876				CC_BY_NC_4_0	2023-08-22T13:34:25Z		https://www.inaturalist.org/observations/177469523	restauration					iNaturalist	Observations	iNaturalist research-grade observations		HUMAN_OBSERVATION				https://www.inaturalist.org/observations/177469523	177469523		restauration													PRESENT								T1/D27/SD/O/56
4400419728				CC_BY_NC_4_0	2023-08-18T07:57:40Z		https://www.inaturalist.org/observations/178492697	restauration					iNaturalist	Observations	iNaturalist research-grade observations		HUMAN_OBSERVATION				https://www.inaturalist.org/observations/178492697	178492697		restauration													PRESENT								687
4400417978				CC_BY_NC_4_0	2023-08-18T08:03:45Z		https://www.inaturalist.org/observations/178334133	restauration					iNaturalist	Observations	iNaturalist research-grade observations		HUMAN_OBSERVATION				https://www.inaturalist.org/observations/178334133	178334133		restauration													PRESENT								T9/D27/SD+VAM/O/380
4400413919				CC_BY_NC_4_0	2023-08-22T13:35:10Z		https://www.inaturalist.org/observations/177468487	restauration					iNaturalist	Observations	iNaturalist research-grade observations		HUMAN_OBSERVATION				https://www.inaturalist.org/observations/177468487	177468487		restauration													PRESENT								T2/D27/SD/O/25
4400412675				CC_BY_NC_4_0	2023-08-22T13:15:50Z		https://www.inaturalist.org/observations/178495877	restauration					iNaturalist	Observations	iNaturalist research-grade observations		HUMAN_OBSERVATION				https://www.inaturalist.org/observations/178495877	178495877		restauration													PRESENT								T8/Polybag/SD/G/744
4400412674				CC_BY_NC_4_0	2023-08-18T07:57:50Z		https://www.inaturalist.org/observations/178492302	restauration					iNaturalist	Observations	iNaturalist research-grade observations		HUMAN_OBSERVATION				https://www.inaturalist.org/observations/178492302	178492302		restauration													PRESENT								620
4400412656				CC_BY_NC_4_0	2023-08-18T08:10:32Z		https://www.inaturalist.org/observations/178330635	restauration					iNaturalist	Observations	iNaturalist research-grade observations		HUMAN_OBSERVATION				https://www.inaturalist.org/observations/178330635	178330635		restauration													PRESENT								T6/D27/Tr/G/301
4400407907				CC_BY_NC_4_0	2023-08-18T08:16:14Z		https://www.inaturalist.org/observations/178326427	restauration					iNaturalist	Observations	iNaturalist research-grade observations		HUMAN_OBSERVATION				https://www.inaturalist.org/observations/178326427	178326427		restauration													PRESENT								T3/D40/SD/O/122
4400400846				CC_BY_NC_4_0	2023-08-18T07:59:06Z		https://www.inaturalist.org/observations/178489417	restauration					iNaturalist	Observations	iNaturalist research-grade observations		HUMAN_OBSERVATION				https://www.inaturalist.org/observations/178489417	178489417		restauration													PRESENT								T11/D40/SD+VAM/O/559
4400400812				CC_BY_NC_4_0	2023-08-18T08:09:31Z		https://www.inaturalist.org/observations/178330016	restauration					iNaturalist	Observations	iNaturalist research-grade observations		HUMAN_OBSERVATION				https://www.inaturalist.org/observations/178330016	178330016		restauration													PRESENT								T5/D27/Tr/O/251
4400400811				CC_BY_NC_4_0	2023-08-18T08:15:47Z		https://www.inaturalist.org/observations/178326958	restauration					iNaturalist	Observations	iNaturalist research-grade observations		HUMAN_OBSERVATION				https://www.inaturalist.org/observations/178326958	178326958		restauration													PRESENT								T3/D40/SD/O/132
4400399925				CC_BY_NC_4_0	2023-08-18T08:04:17Z		https://www.inaturalist.org/observations/178333140	restauration					iNaturalist	Observations	iNaturalist research-grade observations		HUMAN_OBSERVATION				https://www.inaturalist.org/observations/178333140	178333140		restauration													PRESENT								T9/D27/SD+VAM/O/364
4400399923				CC_BY_NC_4_0	2023-08-18T08:16:53Z		https://www.inaturalist.org/observations/178325220	restauration					iNaturalist	Observations	iNaturalist research-grade observations		HUMAN_OBSERVATION				https://www.inaturalist.org/observations/178325220	178325220		restauration													PRESENT								T2/D27/SD/G/108
4400399859				CC_BY_NC_4_0	2023-08-22T13:34:03Z		https://www.inaturalist.org/observations/177469970	restauration					iNaturalist	Observations	iNaturalist research-grade observations		HUMAN_OBSERVATION				https://www.inaturalist.org/observations/177469970	177469970		restauration													PRESENT								T2/D27/SD/O/79
4400398587				CC_BY_NC_4_0	2023-08-18T07:58:53Z		https://www.inaturalist.org/observations/178490313	restauration					iNaturalist	Observations	iNaturalist research-grade observations		HUMAN_OBSERVATION				https://www.inaturalist.org/observations/178490313	178490313		restauration													PRESENT								T12/D40/SD+VAM/G/542
4400397517				CC_BY_NC_4_0	2023-08-18T07:57:06Z		https://www.inaturalist.org/observations/178493607	restauration					iNaturalist	Observations	iNaturalist research-grade observations		HUMAN_OBSERVATION				https://www.inaturalist.org/observations/178493607	178493607		restauration													PRESENT								623
4400394011				CC_BY_NC_4_0	2023-08-18T08:16:29Z		https://www.inaturalist.org/observations/178325598	restauration					iNaturalist	Observations	iNaturalist research-grade observations		HUMAN_OBSERVATION				https://www.inaturalist.org/observations/178325598	178325598		restauration													PRESENT								T2/D27/SD/G/116
4400392599				CC_BY_NC_4_0	2023-08-18T07:59:01Z		https://www.inaturalist.org/observations/178489905	restauration					iNaturalist	Observations	iNaturalist research-grade observations		HUMAN_OBSERVATION				https://www.inaturalist.org/observations/178489905	178489905		restauration													PRESENT								T11/D40/SD+VAM/O/597
4400389721				CC_BY_NC_4_0	2023-08-18T08:16:46Z		https://www.inaturalist.org/observations/178325282	restauration					iNaturalist	Observations	iNaturalist research-grade observations		HUMAN_OBSERVATION				https://www.inaturalist.org/observations/178325282	178325282		restauration													PRESENT								T2/D27/SD/G/110
4400367838				CC_BY_NC_4_0	2023-08-22T13:35:08Z		https://www.inaturalist.org/observations/177468613	restauration					iNaturalist	Observations	iNaturalist research-grade observations		HUMAN_OBSERVATION				https://www.inaturalist.org/observations/177468613	177468613		restauration													PRESENT								T2/D27/SD/O/23
4400364799				CC_BY_NC_4_0	2023-08-22T13:35:08Z		https://www.inaturalist.org/observations/177468671	restauration					iNaturalist	Observations	iNaturalist research-grade observations		HUMAN_OBSERVATION				https://www.inaturalist.org/observations/177468671	177468671		restauration													PRESENT								T2/D27/SD/O/21
4400351913				CC_BY_NC_4_0	2023-08-22T13:34:45Z		https://www.inaturalist.org/observations/177469115	restauration					iNaturalist	Observations	iNaturalist research-grade observations		HUMAN_OBSERVATION				https://www.inaturalist.org/observations/177469115	177469115		restauration													PRESENT								T1/D27/SD/O/48
4400349559				CC_BY_NC_4_0	2023-08-18T07:58:05Z		https://www.inaturalist.org/observations/178490926	restauration					iNaturalist	Observations	iNaturalist research-grade observations		HUMAN_OBSERVATION				https://www.inaturalist.org/observations/178490926	178490926		restauration													PRESENT								T12/D40/SD+VAM/G/590
4400346892				CC_BY_NC_4_0	2023-08-18T07:57:21Z		https://www.inaturalist.org/observations/178493112	restauration					iNaturalist	Observations	iNaturalist research-grade observations		HUMAN_OBSERVATION				https://www.inaturalist.org/observations/178493112	178493112		restauration													PRESENT								608
4400346860				CC_BY_NC_4_0	2023-08-18T08:10:19Z		https://www.inaturalist.org/observations/178330257	restauration					iNaturalist	Observations	iNaturalist research-grade observations		HUMAN_OBSERVATION				https://www.inaturalist.org/observations/178330257	178330257		restauration													PRESENT								T5/D27/Tr/O/257
4400338952				CC_BY_NC_4_0	2023-08-18T08:16:43Z		https://www.inaturalist.org/observations/178325352	restauration					iNaturalist	Observations	iNaturalist research-grade observations		HUMAN_OBSERVATION				https://www.inaturalist.org/observations/178325352	178325352		restauration													PRESENT								T2/D27/SD/G/111
4400338951				CC_BY_NC_4_0	2023-08-18T08:16:50Z		https://www.inaturalist.org/observations/178325253	restauration					iNaturalist	Observations	iNaturalist research-grade observations		HUMAN_OBSERVATION				https://www.inaturalist.org/observations/178325253	178325253		restauration													PRESENT								T2/D27/SD/G/109
4400337969				CC_BY_NC_4_0	2023-08-18T08:15:44Z		https://www.inaturalist.org/observations/178326975	restauration					iNaturalist	Observations	iNaturalist research-grade observations		HUMAN_OBSERVATION				https://www.inaturalist.org/observations/178326975	178326975		restauration													PRESENT								T3/D40/SD/O/133
4400336536				CC_BY_NC_4_0	2023-08-22T13:34:43Z		https://www.inaturalist.org/observations/177469181	restauration					iNaturalist	Observations	iNaturalist research-grade observations		HUMAN_OBSERVATION				https://www.inaturalist.org/observations/177469181	177469181		restauration													PRESENT								T1/D27/SD/O/50
4400334946				CC_BY_NC_4_0	2023-08-18T08:09:34Z		https://www.inaturalist.org/observations/178330083	restauration					iNaturalist	Observations	iNaturalist research-grade observations		HUMAN_OBSERVATION				https://www.inaturalist.org/observations/178330083	178330083		restauration													PRESENT								T5/D27/Tr/O/252
4400334853				CC_BY_NC_4_0	2023-08-22T13:34:19Z		https://www.inaturalist.org/observations/177469685	restauration					iNaturalist	Observations	iNaturalist research-grade observations		HUMAN_OBSERVATION				https://www.inaturalist.org/observations/177469685	177469685		restauration													PRESENT								T1/D27/SD/O/60
4400330605				CC_BY_NC_4_0	2023-08-18T08:17:00Z		https://www.inaturalist.org/observations/178324839	restauration					iNaturalist	Observations	iNaturalist research-grade observations		HUMAN_OBSERVATION				https://www.inaturalist.org/observations/178324839	178324839		restauration													PRESENT								T2/D27/SD/G/105
4400329050				CC_BY_NC_4_0	2023-08-18T07:59:19Z		https://www.inaturalist.org/observations/178489103	restauration					iNaturalist	Observations	iNaturalist research-grade observations		HUMAN_OBSERVATION				https://www.inaturalist.org/observations/178489103	178489103		restauration													PRESENT								T11/D40/SD+VAM/O/533
4400325917				CC_BY_NC_4_0	2023-08-18T08:09:00Z		https://www.inaturalist.org/observations/178328563	restauration					iNaturalist	Observations	iNaturalist research-grade observations		HUMAN_OBSERVATION				https://www.inaturalist.org/observations/178328563	178328563		restauration													PRESENT								T4/D40/SD/G/198
4400323629				CC_BY_NC_4_0	2023-08-18T07:57:43Z		https://www.inaturalist.org/observations/178492588	restauration					iNaturalist	Observations	iNaturalist research-grade observations		HUMAN_OBSERVATION				https://www.inaturalist.org/observations/178492588	178492588		restauration													PRESENT								680
4400320892				CC_BY_NC_4_0	2023-08-18T07:57:09Z		https://www.inaturalist.org/observations/178493266	restauration					iNaturalist	Observations	iNaturalist research-grade observations		HUMAN_OBSERVATION				https://www.inaturalist.org/observations/178493266	178493266		restauration													PRESENT								624
4400320009				CC_BY_NC_4_0	2023-08-18T08:16:08Z		https://www.inaturalist.org/observations/178326500	restauration					iNaturalist	Observations	iNaturalist research-grade observations		HUMAN_OBSERVATION				https://www.inaturalist.org/observations/178326500	178326500		restauration													PRESENT								T3/D40/SD/O/124
4400317744				CC_BY_NC_4_0	2023-08-22T13:35:28Z		https://www.inaturalist.org/observations/177467162	restauration					iNaturalist	Observations	iNaturalist research-grade observations		HUMAN_OBSERVATION				https://www.inaturalist.org/observations/177467162	177467162		restauration													PRESENT								T1/D27/SD/O/3
4400303523				CC_BY_NC_4_0	2023-08-18T07:56:56Z		https://www.inaturalist.org/observations/178493813	restauration					iNaturalist	Observations	iNaturalist research-grade observations		HUMAN_OBSERVATION				https://www.inaturalist.org/observations/178493813	178493813		restauration													PRESENT								602
4400299868				CC_BY_NC_4_0	2023-08-18T08:15:11Z		https://www.inaturalist.org/observations/178327792	restauration					iNaturalist	Observations	iNaturalist research-grade observations		HUMAN_OBSERVATION				https://www.inaturalist.org/observations/178327792	178327792		restauration													PRESENT								T4/D40/SD/G/184
4400295548				CC_BY_NC_4_0	2023-08-18T07:52:59Z		https://www.inaturalist.org/observations/178495659	restauration					iNaturalist	Observations	iNaturalist research-grade observations		HUMAN_OBSERVATION				https://www.inaturalist.org/observations/178495659	178495659		restauration													PRESENT								T8/Polybag/SD/G/762
4400295537				CC_BY_NC_4_0	2023-08-18T08:07:14Z		https://www.inaturalist.org/observations/178331407	restauration					iNaturalist	Observations	iNaturalist research-grade observations		HUMAN_OBSERVATION				https://www.inaturalist.org/observations/178331407	178331407		restauration													PRESENT								T6/D27/Tr/G/309
4400294965				CC_BY_NC_4_0	2023-08-18T07:59:17Z		https://www.inaturalist.org/observations/178489143	restauration					iNaturalist	Observations	iNaturalist research-grade observations		HUMAN_OBSERVATION				https://www.inaturalist.org/observations/178489143	178489143		restauration													PRESENT								T11/D40/SD+VAM/O/535
4400291497				CC_BY_NC_4_0	2023-08-18T07:58:23Z		https://www.inaturalist.org/observations/178490658	restauration					iNaturalist	Observations	iNaturalist research-grade observations		HUMAN_OBSERVATION				https://www.inaturalist.org/observations/178490658	178490658		restauration													PRESENT								T12/D40/SD+VAM/G/551
4400291496				CC_BY_NC_4_0	2023-08-18T07:58:39Z		https://www.inaturalist.org/observations/178490559	restauration					iNaturalist	Observations	iNaturalist research-grade observations		HUMAN_OBSERVATION				https://www.inaturalist.org/observations/178490559	178490559		restauration													PRESENT								T12/D40/SD+VAM/G/547
4400289494				CC_BY_NC_4_0	2023-08-18T08:06:42Z		https://www.inaturalist.org/observations/178331917	restauration					iNaturalist	Observations	iNaturalist research-grade observations		HUMAN_OBSERVATION				https://www.inaturalist.org/observations/178331917	178331917		restauration													PRESENT								T6/D27/Tr/G/318
4400289466				CC_BY_NC_4_0	2023-08-22T13:32:23Z		https://www.inaturalist.org/observations/177470617	restauration					iNaturalist	Observations	iNaturalist research-grade observations		HUMAN_OBSERVATION				https://www.inaturalist.org/observations/177470617	177470617		restauration													PRESENT								T2/D27/SD/O/63
4400287059				CC_BY_NC_4_0	2023-08-18T07:53:16Z		https://www.inaturalist.org/observations/178495231	restauration					iNaturalist	Observations	iNaturalist research-grade observations		HUMAN_OBSERVATION				https://www.inaturalist.org/observations/178495231	178495231		restauration													PRESENT								T14/D27/Tr+VAM/G/72
4400287004				CC_BY_NC_4_0	2023-08-22T13:19:38Z		https://www.inaturalist.org/observations/178332970	restauration					iNaturalist	Observations	iNaturalist research-grade observations		HUMAN_OBSERVATION				https://www.inaturalist.org/observations/178332970	178332970		restauration													PRESENT								T9/D27/SD+VAM/O/362
4400286999				CC_BY_NC_4_0	2023-08-18T08:16:55Z		https://www.inaturalist.org/observations/178325149	restauration					iNaturalist	Observations	iNaturalist research-grade observations		HUMAN_OBSERVATION				https://www.inaturalist.org/observations/178325149	178325149		restauration													PRESENT								T2/D27/SD/G/107
4400272787				CC_BY_NC_4_0	2023-08-22T13:35:29Z		https://www.inaturalist.org/observations/177467098	restauration					iNaturalist	Observations	iNaturalist research-grade observations		HUMAN_OBSERVATION				https://www.inaturalist.org/observations/177467098	177467098		restauration													PRESENT								T1/D27/SD/O/2
4400240923				CC_BY_NC_4_0	2023-08-18T08:03:38Z		https://www.inaturalist.org/observations/178334688	restauration					iNaturalist	Observations	iNaturalist research-grade observations		HUMAN_OBSERVATION				https://www.inaturalist.org/observations/178334688	178334688		restauration													PRESENT								T10/D27/SD+VAM/G/423
4400240821				CC_BY_NC_4_0	2023-08-22T13:35:10Z		https://www.inaturalist.org/observations/177468537	restauration					iNaturalist	Observations	iNaturalist research-grade observations		HUMAN_OBSERVATION				https://www.inaturalist.org/observations/177468537	177468537		restauration													PRESENT								T2/D27/SD/O/24
4400234969				CC_BY_NC_4_0	2023-08-18T08:09:24Z		https://www.inaturalist.org/observations/178329863	restauration					iNaturalist	Observations	iNaturalist research-grade observations		HUMAN_OBSERVATION				https://www.inaturalist.org/observations/178329863	178329863		restauration													PRESENT								T5/D27/Tr/O/248
4400234967				CC_BY_NC_4_0	2023-08-18T08:15:04Z		https://www.inaturalist.org/observations/178327883	restauration					iNaturalist	Observations	iNaturalist research-grade observations		HUMAN_OBSERVATION				https://www.inaturalist.org/observations/178327883	178327883		restauration													PRESENT								T4/D40/SD/G/187
4400234890				CC_BY_NC_4_0	2023-08-22T13:34:55Z		https://www.inaturalist.org/observations/177468860	restauration					iNaturalist	Observations	iNaturalist research-grade observations		HUMAN_OBSERVATION				https://www.inaturalist.org/observations/177468860	177468860		restauration													PRESENT								T1/D27/SD/O/42
4400233677				CC_BY_NC_4_0	2023-08-18T08:16:15Z		https://www.inaturalist.org/observations/178326183	restauration					iNaturalist	Observations	iNaturalist research-grade observations		HUMAN_OBSERVATION				https://www.inaturalist.org/observations/178326183	178326183		restauration													PRESENT								T3/D40/SD/G/121
4400231868				CC_BY_NC_4_0	2023-08-22T13:35:12Z		https://www.inaturalist.org/observations/177468446	restauration					iNaturalist	Observations	iNaturalist research-grade observations		HUMAN_OBSERVATION				https://www.inaturalist.org/observations/177468446	177468446		restauration													PRESENT								T2/D27/SD/O/26
4400231044				CC_BY_NC_4_0	2023-08-18T07:53:36Z		https://www.inaturalist.org/observations/178494382	restauration					iNaturalist	Observations	iNaturalist research-grade observations		HUMAN_OBSERVATION				https://www.inaturalist.org/observations/178494382	178494382		restauration													PRESENT								T14/D27/Tr+VAM/G/665
4400231006				CC_BY_NC_4_0	2023-08-18T08:09:39Z		https://www.inaturalist.org/observations/178330130	restauration					iNaturalist	Observations	iNaturalist research-grade observations		HUMAN_OBSERVATION				https://www.inaturalist.org/observations/178330130	178330130		restauration													PRESENT								T5/D27/Tr/O/254
4400229967				CC_BY_NC_4_0	2023-08-18T07:59:04Z		https://www.inaturalist.org/observations/178489510	restauration					iNaturalist	Observations	iNaturalist research-grade observations		HUMAN_OBSERVATION				https://www.inaturalist.org/observations/178489510	178489510		restauration													PRESENT								T11/D40/SD+VAM/O/579
4400228908				CC_BY_NC_4_0	2023-08-18T08:16:04Z		https://www.inaturalist.org/observations/178326572	restauration					iNaturalist	Observations	iNaturalist research-grade observations		HUMAN_OBSERVATION				https://www.inaturalist.org/observations/178326572	178326572		restauration													PRESENT								T3/D40/SD/O/126
4400227733				CC_BY_NC_4_0	2023-08-22T13:34:45Z		https://www.inaturalist.org/observations/177469054	restauration					iNaturalist	Observations	iNaturalist research-grade observations		HUMAN_OBSERVATION				https://www.inaturalist.org/observations/177469054	177469054		restauration													PRESENT								T1/D27/SD/O/47
4400224616				CC_BY_NC_4_0	2023-08-18T08:07:04Z		https://www.inaturalist.org/observations/178331736	restauration					iNaturalist	Observations	iNaturalist research-grade observations		HUMAN_OBSERVATION				https://www.inaturalist.org/observations/178331736	178331736		restauration													PRESENT								T6/D27/Tr/G/312
4400221018				CC_BY_NC_4_0	2023-08-18T07:59:08Z		https://www.inaturalist.org/observations/178489355	restauration					iNaturalist	Observations	iNaturalist research-grade observations		HUMAN_OBSERVATION				https://www.inaturalist.org/observations/178489355	178489355		restauration													PRESENT								T11/D40/SD+VAM/O/557
4400219490				CC_BY_NC_4_0	2023-08-18T07:58:26Z		https://www.inaturalist.org/observations/178490625	restauration					iNaturalist	Observations	iNaturalist research-grade observations		HUMAN_OBSERVATION				https://www.inaturalist.org/observations/178490625	178490625		restauration													PRESENT								T12/D40/SD+VAM/G/550
4400217944				CC_BY_NC_4_0	2023-08-18T07:53:11Z		https://www.inaturalist.org/observations/178495564	restauration					iNaturalist	Observations	iNaturalist research-grade observations		HUMAN_OBSERVATION				https://www.inaturalist.org/observations/178495564	178495564		restauration													PRESENT								T8/Polybag/SD/G/722
4400217943				CC_BY_NC_4_0	2023-08-18T07:53:30Z		https://www.inaturalist.org/observations/178494475	restauration					iNaturalist	Observations	iNaturalist research-grade observations		HUMAN_OBSERVATION				https://www.inaturalist.org/observations/178494475	178494475		restauration													PRESENT								T14/D27/Tr+VAM/G/667
4400217898				CC_BY_NC_4_0	2023-08-18T08:15:06Z		https://www.inaturalist.org/observations/178327858	restauration					iNaturalist	Observations	iNaturalist research-grade observations		HUMAN_OBSERVATION				https://www.inaturalist.org/observations/178327858	178327858		restauration													PRESENT								T4/D40/SD/G/186
4400215701				CC_BY_NC_4_0	2023-08-18T07:58:51Z		https://www.inaturalist.org/observations/178490344	restauration					iNaturalist	Observations	iNaturalist research-grade observations		HUMAN_OBSERVATION				https://www.inaturalist.org/observations/178490344	178490344		restauration													PRESENT								T12/D40/SD+VAM/G/543
4400215676				CC_BY_NC_4_0	2023-08-18T08:17:02Z		https://www.inaturalist.org/observations/178324717	restauration					iNaturalist	Observations	iNaturalist research-grade observations		HUMAN_OBSERVATION				https://www.inaturalist.org/observations/178324717	178324717		restauration													PRESENT								T2/D27/SD/G/103
4400215032				CC_BY_NC_4_0	2023-08-18T07:59:12Z		https://www.inaturalist.org/observations/178489288	restauration					iNaturalist	Observations	iNaturalist research-grade observations		HUMAN_OBSERVATION				https://www.inaturalist.org/observations/178489288	178489288		restauration													PRESENT								T11/D40/SD+VAM/O/535
4400205038				CC_BY_NC_4_0	2023-08-18T08:09:03Z		https://www.inaturalist.org/observations/178328602	restauration					iNaturalist	Observations	iNaturalist research-grade observations		HUMAN_OBSERVATION				https://www.inaturalist.org/observations/178328602	178328602		restauration													PRESENT								T4/D40/SD/G/199
4400205037				CC_BY_NC_4_0	2023-08-18T08:16:00Z		https://www.inaturalist.org/observations/178326622	restauration					iNaturalist	Observations	iNaturalist research-grade observations		HUMAN_OBSERVATION				https://www.inaturalist.org/observations/178326622	178326622		restauration													PRESENT								T3/D40/SD/O/127
4400203748				CC_BY_NC_4_0	2023-08-18T07:56:54Z		https://www.inaturalist.org/observations/178493962	restauration					iNaturalist	Observations	iNaturalist research-grade observations		HUMAN_OBSERVATION				https://www.inaturalist.org/observations/178493962	178493962		restauration													PRESENT								T14/D27/Tr+VAM/G/661
4400202491				CC_BY_NC_4_0	2023-08-18T08:09:11Z		https://www.inaturalist.org/observations/178329181	restauration					iNaturalist	Observations	iNaturalist research-grade observations		HUMAN_OBSERVATION				https://www.inaturalist.org/observations/178329181	178329181		restauration													PRESENT								T5/D27/Tr/O/241
4400195029				CC_BY_NC_4_0	2023-08-18T08:15:41Z		https://www.inaturalist.org/observations/178327008	restauration					iNaturalist	Observations	iNaturalist research-grade observations		HUMAN_OBSERVATION				https://www.inaturalist.org/observations/178327008	178327008		restauration													PRESENT								T3/D40/SD/O/134
4400190746				CC_BY_NC_4_0	2023-08-18T08:08:48Z		https://www.inaturalist.org/observations/178328065	restauration					iNaturalist	Observations	iNaturalist research-grade observations		HUMAN_OBSERVATION				https://www.inaturalist.org/observations/178328065	178328065		restauration													PRESENT								T4/D40/SD/G/192
4400190745				CC_BY_NC_4_0	2023-08-18T08:15:31Z		https://www.inaturalist.org/observations/178327174	restauration					iNaturalist	Observations	iNaturalist research-grade observations		HUMAN_OBSERVATION				https://www.inaturalist.org/observations/178327174	178327174		restauration													PRESENT								T3/D40/SD/O/156
4400183643				CC_BY_NC_4_0	2023-08-18T07:53:28Z		https://www.inaturalist.org/observations/178494635	restauration					iNaturalist	Observations	iNaturalist research-grade observations		HUMAN_OBSERVATION				https://www.inaturalist.org/observations/178494635	178494635		restauration													PRESENT								T14/D27/Tr+VAM/G/668
4400183614				CC_BY_NC_4_0	2023-08-18T08:03:56Z		https://www.inaturalist.org/observations/178333859	restauration					iNaturalist	Observations	iNaturalist research-grade observations		HUMAN_OBSERVATION				https://www.inaturalist.org/observations/178333859	178333859		restauration													PRESENT								T9/D27/SD+VAM/O/374
4400183613				CC_BY_NC_4_0	2023-08-18T08:06:40Z		https://www.inaturalist.org/observations/178331978	restauration					iNaturalist	Observations	iNaturalist research-grade observations		HUMAN_OBSERVATION				https://www.inaturalist.org/observations/178331978	178331978		restauration													PRESENT								T6/D27/Tr/G/319
4400179769				CC_BY_NC_4_0	2023-09-05T18:39:30Z		https://www.inaturalist.org/observations/179569007	silviagu					iNaturalist	Observations	iNaturalist research-grade observations		HUMAN_OBSERVATION				https://www.inaturalist.org/observations/179569007	179569007		silviagu													PRESENT
4400174967				CC_BY_NC_4_0	2023-08-18T07:59:21Z		https://www.inaturalist.org/observations/178489034	restauration					iNaturalist	Observations	iNaturalist research-grade observations		HUMAN_OBSERVATION				https://www.inaturalist.org/observations/178489034	178489034		restauration													PRESENT								T11/D40/SD+VAM/O/507
4400174934				CC_BY_NC_4_0	2023-08-18T08:00:51Z		https://www.inaturalist.org/observations/178335386	restauration					iNaturalist	Observations	iNaturalist research-grade observations		HUMAN_OBSERVATION				https://www.inaturalist.org/observations/178335386	178335386		restauration													PRESENT								T10/D27/SD+VAM/G/437
4400171698				CC_BY_NC_4_0	2023-08-18T07:52:31Z		https://www.inaturalist.org/observations/178495910	restauration					iNaturalist	Observations	iNaturalist research-grade observations		HUMAN_OBSERVATION				https://www.inaturalist.org/observations/178495910	178495910		restauration													PRESENT								T8/Polybag/SD/G/745
4400171697				CC_BY_NC_4_0	2023-08-18T07:53:06Z		https://www.inaturalist.org/observations/178495613	restauration					iNaturalist	Observations	iNaturalist research-grade observations		HUMAN_OBSERVATION				https://www.inaturalist.org/observations/178495613	178495613		restauration													PRESENT								T8/Polybag/SD/G/761
4400171694				CC_BY_NC_4_0	2023-08-18T07:58:49Z		https://www.inaturalist.org/observations/178490465	restauration					iNaturalist	Observations	iNaturalist research-grade observations		HUMAN_OBSERVATION				https://www.inaturalist.org/observations/178490465	178490465		restauration													PRESENT								T12/D40/SD+VAM/G/544
4400169608				CC_BY_NC_4_0	2023-08-22T13:34:43Z		https://www.inaturalist.org/observations/177469150	restauration					iNaturalist	Observations	iNaturalist research-grade observations		HUMAN_OBSERVATION				https://www.inaturalist.org/observations/177469150	177469150		restauration													PRESENT								T1/D27/SD/O/49
4400169037				CC_BY_NC_4_0	2023-08-18T07:57:19Z		https://www.inaturalist.org/observations/178493141	restauration					iNaturalist	Observations	iNaturalist research-grade observations		HUMAN_OBSERVATION				https://www.inaturalist.org/observations/178493141	178493141		restauration													PRESENT								607
4400168901				CC_BY_NC_4_0	2023-08-22T13:34:52Z		https://www.inaturalist.org/observations/177468997	restauration					iNaturalist	Observations	iNaturalist research-grade observations		HUMAN_OBSERVATION				https://www.inaturalist.org/observations/177468997	177468997		restauration													PRESENT								T1/D27/SD/O/45
4400168900				CC_BY_NC_4_0	2023-08-22T13:34:56Z		https://www.inaturalist.org/observations/177468799	restauration					iNaturalist	Observations	iNaturalist research-grade observations		HUMAN_OBSERVATION				https://www.inaturalist.org/observations/177468799	177468799		restauration													PRESENT								T1/D27/SD/O/41
4400167514				CC_BY_NC_4_0	2023-08-22T13:33:17Z		https://www.inaturalist.org/observations/177470515	restauration					iNaturalist	Observations	iNaturalist research-grade observations		HUMAN_OBSERVATION				https://www.inaturalist.org/observations/177470515	177470515		restauration													PRESENT								T2/D27/SD/O/65
4400166594				CC_BY_NC_4_0	2023-08-18T07:57:15Z		https://www.inaturalist.org/observations/178493239	restauration					iNaturalist	Observations	iNaturalist research-grade observations		HUMAN_OBSERVATION				https://www.inaturalist.org/observations/178493239	178493239		restauration													PRESENT								606
4400165574				CC_BY_NC_4_0	2023-08-22T13:34:39Z		https://www.inaturalist.org/observations/177469270	restauration					iNaturalist	Observations	iNaturalist research-grade observations		HUMAN_OBSERVATION				https://www.inaturalist.org/observations/177469270	177469270		restauration													PRESENT								T1/D27/SD/O/54
4400160825				CC_BY_NC_4_0	2023-08-22T13:34:40Z		https://www.inaturalist.org/observations/177469255	restauration					iNaturalist	Observations	iNaturalist research-grade observations		HUMAN_OBSERVATION				https://www.inaturalist.org/observations/177469255	177469255		restauration													PRESENT								T1/D27/SD/O/53
4400156803				CC_BY_NC_4_0	2023-08-18T07:53:33Z		https://www.inaturalist.org/observations/178494412	restauration					iNaturalist	Observations	iNaturalist research-grade observations		HUMAN_OBSERVATION				https://www.inaturalist.org/observations/178494412	178494412		restauration													PRESENT								T14/D27/Tr+VAM/G/666
4400156767				CC_BY_NC_4_0	2023-08-18T08:00:56Z		https://www.inaturalist.org/observations/178335319	restauration					iNaturalist	Observations	iNaturalist research-grade observations		HUMAN_OBSERVATION				https://www.inaturalist.org/observations/178335319	178335319		restauration													PRESENT								T10/D27/SD+VAM/G/434
4400156764				CC_BY_NC_4_0	2023-08-18T08:15:55Z		https://www.inaturalist.org/observations/178326706	restauration					iNaturalist	Observations	iNaturalist research-grade observations		HUMAN_OBSERVATION				https://www.inaturalist.org/observations/178326706	178326706		restauration													PRESENT								T3/D40/SD/O/129
4400156669				CC_BY_NC_4_0	2023-08-22T13:33:09Z		https://www.inaturalist.org/observations/177470554	restauration					iNaturalist	Observations	iNaturalist research-grade observations		HUMAN_OBSERVATION				https://www.inaturalist.org/observations/177470554	177470554		restauration													PRESENT								T2/D27/SD/O/64
4400144563				CC_BY_NC_4_0	2023-08-18T07:58:13Z		https://www.inaturalist.org/observations/178490838	restauration					iNaturalist	Observations	iNaturalist research-grade observations		HUMAN_OBSERVATION				https://www.inaturalist.org/observations/178490838	178490838		restauration													PRESENT								T12/D40/SD+VAM/G/555
4400140792				CC_BY_NC_4_0	2023-08-18T08:04:07Z		https://www.inaturalist.org/observations/178333514	restauration					iNaturalist	Observations	iNaturalist research-grade observations		HUMAN_OBSERVATION				https://www.inaturalist.org/observations/178333514	178333514		restauration													PRESENT								T9/D27/SD+VAM/O/369
4400138831				CC_BY_NC_4_0	2023-08-18T07:53:19Z		https://www.inaturalist.org/observations/178494830	restauration					iNaturalist	Observations	iNaturalist research-grade observations		HUMAN_OBSERVATION				https://www.inaturalist.org/observations/178494830	178494830		restauration													PRESENT								T14/D27/Tr+VAM/G/671
4400138830				CC_BY_NC_4_0	2023-08-18T07:56:41Z		https://www.inaturalist.org/observations/178494236	restauration					iNaturalist	Observations	iNaturalist research-grade observations		HUMAN_OBSERVATION				https://www.inaturalist.org/observations/178494236	178494236		restauration													PRESENT								683
4400136881				CC_BY_NC_4_0	2023-08-22T13:34:39Z		https://www.inaturalist.org/observations/177469310	restauration					iNaturalist	Observations	iNaturalist research-grade observations		HUMAN_OBSERVATION				https://www.inaturalist.org/observations/177469310	177469310		restauration													PRESENT								T1/D27/SD/O/55
4400129968				CC_BY_NC_4_0	2023-08-18T08:16:10Z		https://www.inaturalist.org/observations/178326468	restauration					iNaturalist	Observations	iNaturalist research-grade observations		HUMAN_OBSERVATION				https://www.inaturalist.org/observations/178326468	178326468		restauration													PRESENT								T3/D40/SD/O/123
4400123536				CC_BY_NC_4_0	2023-08-18T07:58:07Z		https://www.inaturalist.org/observations/178490897	restauration					iNaturalist	Observations	iNaturalist research-grade observations		HUMAN_OBSERVATION				https://www.inaturalist.org/observations/178490897	178490897		restauration													PRESENT								T12/D40/SD+VAM/G/572
4400115986				CC_BY_NC_4_0	2023-08-18T08:09:05Z		https://www.inaturalist.org/observations/178328632	restauration					iNaturalist	Observations	iNaturalist research-grade observations		HUMAN_OBSERVATION				https://www.inaturalist.org/observations/178328632	178328632		restauration													PRESENT								T4/D40/SD/G/200
4400114016				CC_BY_NC_4_0	2023-08-18T07:53:39Z		https://www.inaturalist.org/observations/178494293	restauration					iNaturalist	Observations	iNaturalist research-grade observations		HUMAN_OBSERVATION				https://www.inaturalist.org/observations/178494293	178494293		restauration													PRESENT								T14/D27/Tr+VAM/G/684
4400109657				CC_BY_NC_4_0	2023-08-18T08:09:13Z		https://www.inaturalist.org/observations/178329384	restauration					iNaturalist	Observations	iNaturalist research-grade observations		HUMAN_OBSERVATION				https://www.inaturalist.org/observations/178329384	178329384		restauration													PRESENT								T5/D27/Tr/O/243
4400107968				CC_BY_NC_4_0	2023-08-18T08:03:42Z		https://www.inaturalist.org/observations/178334565	restauration					iNaturalist	Observations	iNaturalist research-grade observations		HUMAN_OBSERVATION				https://www.inaturalist.org/observations/178334565	178334565		restauration													PRESENT								T10/D27/SD+VAM/G/421
4400107964				CC_BY_NC_4_0	2023-08-18T08:15:19Z		https://www.inaturalist.org/observations/178327338	restauration					iNaturalist	Observations	iNaturalist research-grade observations		HUMAN_OBSERVATION				https://www.inaturalist.org/observations/178327338	178327338		restauration													PRESENT								T3/D40/SD/O/180
4400107963				CC_BY_NC_4_0	2023-08-18T08:15:53Z		https://www.inaturalist.org/observations/178326744	restauration					iNaturalist	Observations	iNaturalist research-grade observations		HUMAN_OBSERVATION				https://www.inaturalist.org/observations/178326744	178326744		restauration													PRESENT								T3/D40/SD/O/130
4400107871				CC_BY_NC_4_0	2023-08-22T13:34:20Z		https://www.inaturalist.org/observations/177469602	restauration					iNaturalist	Observations	iNaturalist research-grade observations		HUMAN_OBSERVATION				https://www.inaturalist.org/observations/177469602	177469602		restauration													PRESENT								T1/D27/SD/O/59
4400097659				CC_BY_NC_4_0	2023-08-18T08:10:42Z		https://www.inaturalist.org/observations/178330789	restauration					iNaturalist	Observations	iNaturalist research-grade observations		HUMAN_OBSERVATION				https://www.inaturalist.org/observations/178330789	178330789		restauration													PRESENT								T6/D27/Tr/G/304
4400093635				CC_BY_NC_4_0	2023-08-18T07:58:00Z		https://www.inaturalist.org/observations/178491005	restauration					iNaturalist	Observations	iNaturalist research-grade observations		HUMAN_OBSERVATION				https://www.inaturalist.org/observations/178491005	178491005		restauration													PRESENT								T12/D40/SD+VAM/G/584
4400093634				CC_BY_NC_4_0	2023-08-18T07:59:28Z		https://www.inaturalist.org/observations/178488937	restauration					iNaturalist	Observations	iNaturalist research-grade observations		HUMAN_OBSERVATION				https://www.inaturalist.org/observations/178488937	178488937		restauration													PRESENT								T11/D40/SD+VAM/O/486
4400093609				CC_BY_NC_4_0	2023-08-18T08:06:54Z		https://www.inaturalist.org/observations/178331813	restauration					iNaturalist	Observations	iNaturalist research-grade observations		HUMAN_OBSERVATION				https://www.inaturalist.org/observations/178331813	178331813		restauration													PRESENT								T6/D27/Tr/G/315
4400093607				CC_BY_NC_4_0	2023-08-18T08:18:19Z		https://www.inaturalist.org/observations/178330823	restauration					iNaturalist	Observations	iNaturalist research-grade observations		HUMAN_OBSERVATION				https://www.inaturalist.org/observations/178330823	178330823		restauration													PRESENT								T6/D27/Tr/G/305
4400091954				CC_BY_NC_4_0	2023-08-18T08:04:02Z		https://www.inaturalist.org/observations/178333592	restauration					iNaturalist	Observations	iNaturalist research-grade observations		HUMAN_OBSERVATION				https://www.inaturalist.org/observations/178333592	178333592		restauration													PRESENT								T9/D27/SD+VAM/O/371
4400087568				CC_BY_NC_4_0	2023-08-18T08:08:55Z		https://www.inaturalist.org/observations/178328480	restauration					iNaturalist	Observations	iNaturalist research-grade observations		HUMAN_OBSERVATION				https://www.inaturalist.org/observations/178328480	178328480		restauration													PRESENT								T4/D40/SD/G/195
4400085649				CC_BY_NC_4_0	2023-08-18T07:58:46Z		https://www.inaturalist.org/observations/178490498	restauration					iNaturalist	Observations	iNaturalist research-grade observations		HUMAN_OBSERVATION				https://www.inaturalist.org/observations/178490498	178490498		restauration													PRESENT								T12/D40/SD+VAM/G/545
4400081958				CC_BY_NC_4_0	2023-08-18T07:56:49Z		https://www.inaturalist.org/observations/178494035	restauration					iNaturalist	Observations	iNaturalist research-grade observations		HUMAN_OBSERVATION				https://www.inaturalist.org/observations/178494035	178494035		restauration													PRESENT								T14/D27/Tr+VAM/G/663
4400081915				CC_BY_NC_4_0	2023-08-18T08:04:25Z		https://www.inaturalist.org/observations/178332863	restauration					iNaturalist	Observations	iNaturalist research-grade observations		HUMAN_OBSERVATION				https://www.inaturalist.org/observations/178332863	178332863		restauration													PRESENT								T9/D27/SD+VAM/O/361
4400081795				CC_BY_NC_4_0	2023-08-22T13:35:27Z		https://www.inaturalist.org/observations/177467207	restauration					iNaturalist	Observations	iNaturalist research-grade observations		HUMAN_OBSERVATION				https://www.inaturalist.org/observations/177467207	177467207		restauration													PRESENT								T1/D27/SD/O/4
4400078021				CC_BY_NC_4_0	2023-08-18T08:08:52Z		https://www.inaturalist.org/observations/178328425	restauration					iNaturalist	Observations	iNaturalist research-grade observations		HUMAN_OBSERVATION				https://www.inaturalist.org/observations/178328425	178328425		restauration													PRESENT								T4/D40/SD/G/194
4400077905				CC_BY_NC_4_0	2023-08-22T13:34:42Z		https://www.inaturalist.org/observations/177469204	restauration					iNaturalist	Observations	iNaturalist research-grade observations		HUMAN_OBSERVATION				https://www.inaturalist.org/observations/177469204	177469204		restauration													PRESENT								T1/D27/SD/O/51
4400076729				CC_BY_NC_4_0	2023-08-18T08:15:23Z		https://www.inaturalist.org/observations/178327284	restauration					iNaturalist	Observations	iNaturalist research-grade observations		HUMAN_OBSERVATION				https://www.inaturalist.org/observations/178327284	178327284		restauration													PRESENT								T3/D40/SD/O/178
4400074915				CC_BY_NC_4_0	2023-08-18T08:01:03Z		https://www.inaturalist.org/observations/178335273	restauration					iNaturalist	Observations	iNaturalist research-grade observations		HUMAN_OBSERVATION				https://www.inaturalist.org/observations/178335273	178335273		restauration													PRESENT								T10/D27/SD+VAM/G/432
4400068742				CC_BY_NC_4_0	2023-08-22T13:34:54Z		https://www.inaturalist.org/observations/177468890	restauration					iNaturalist	Observations	iNaturalist research-grade observations		HUMAN_OBSERVATION				https://www.inaturalist.org/observations/177468890	177468890		restauration													PRESENT								T1/D27/SD/O/43
4400063931				CC_BY_NC_4_0	2023-08-18T08:09:15Z		https://www.inaturalist.org/observations/178329500	restauration					iNaturalist	Observations	iNaturalist research-grade observations		HUMAN_OBSERVATION				https://www.inaturalist.org/observations/178329500	178329500		restauration													PRESENT								T5/D27/Tr/O/244
4400062499				CC_BY_NC_4_0	2023-08-18T08:04:00Z		https://www.inaturalist.org/observations/178333707	restauration					iNaturalist	Observations	iNaturalist research-grade observations		HUMAN_OBSERVATION				https://www.inaturalist.org/observations/178333707	178333707		restauration													PRESENT								T9/D27/SD+VAM/O/372
4400060053				CC_BY_NC_4_0	2023-08-18T08:16:40Z		https://www.inaturalist.org/observations/178325431	restauration					iNaturalist	Observations	iNaturalist research-grade observations		HUMAN_OBSERVATION				https://www.inaturalist.org/observations/178325431	178325431		restauration													PRESENT								T2/D27/SD/G/112
4400058059				CC_BY_NC_4_0	2023-08-18T07:57:55Z		https://www.inaturalist.org/observations/178491080	restauration					iNaturalist	Observations	iNaturalist research-grade observations		HUMAN_OBSERVATION				https://www.inaturalist.org/observations/178491080	178491080		restauration													PRESENT								T12/D40/SD+VAM/G/581
4400058025				CC_BY_NC_4_0	2023-08-18T08:15:32Z		https://www.inaturalist.org/observations/178327136	restauration					iNaturalist	Observations	iNaturalist research-grade observations		HUMAN_OBSERVATION				https://www.inaturalist.org/observations/178327136	178327136		restauration													PRESENT								T3/D40/SD/O/135
4400054712				CC_BY_NC_4_0	2023-08-18T08:01:08Z		https://www.inaturalist.org/observations/178334989	restauration					iNaturalist	Observations	iNaturalist research-grade observations		HUMAN_OBSERVATION				https://www.inaturalist.org/observations/178334989	178334989		restauration													PRESENT								T10/D27/SD+VAM/G/430
4400050646				CC_BY_NC_4_0	2023-08-18T07:57:30Z		https://www.inaturalist.org/observations/178492908	restauration					iNaturalist	Observations	iNaturalist research-grade observations		HUMAN_OBSERVATION				https://www.inaturalist.org/observations/178492908	178492908		restauration													PRESENT								632
4400043500				CC_BY_NC_4_0	2023-08-18T08:06:50Z		https://www.inaturalist.org/observations/178331838	restauration					iNaturalist	Observations	iNaturalist research-grade observations		HUMAN_OBSERVATION				https://www.inaturalist.org/observations/178331838	178331838		restauration													PRESENT								T6/D27/Tr/G/316
4400042676				CC_BY_NC_4_0	2023-08-18T08:03:49Z		https://www.inaturalist.org/observations/178334081	restauration					iNaturalist	Observations	iNaturalist research-grade observations		HUMAN_OBSERVATION				https://www.inaturalist.org/observations/178334081	178334081		restauration													PRESENT								T9/D27/SD+VAM/O/378
4400042675				CC_BY_NC_4_0	2023-08-18T08:11:23Z		https://www.inaturalist.org/observations/178328042	restauration					iNaturalist	Observations	iNaturalist research-grade observations		HUMAN_OBSERVATION				https://www.inaturalist.org/observations/178328042	178328042		restauration													PRESENT								T4/D40/SD/G/191
4400038604				CC_BY_NC_4_0	2023-08-18T07:52:49Z		https://www.inaturalist.org/observations/178495735	restauration					iNaturalist	Observations	iNaturalist research-grade observations		HUMAN_OBSERVATION				https://www.inaturalist.org/observations/178495735	178495735		restauration													PRESENT								T8/Polybag/SD/G/764
4400038600				CC_BY_NC_4_0	2023-08-18T07:58:03Z		https://www.inaturalist.org/observations/178490983	restauration					iNaturalist	Observations	iNaturalist research-grade observations		HUMAN_OBSERVATION				https://www.inaturalist.org/observations/178490983	178490983		restauration													PRESENT								T12/D40/SD+VAM/G/587
4400022925				CC_BY_NC_4_0	2023-08-18T08:04:11Z		https://www.inaturalist.org/observations/178333269	restauration					iNaturalist	Observations	iNaturalist research-grade observations		HUMAN_OBSERVATION				https://www.inaturalist.org/observations/178333269	178333269		restauration													PRESENT								T9/D27/SD+VAM/O/367
4400022924				CC_BY_NC_4_0	2023-08-18T08:09:26Z		https://www.inaturalist.org/observations/178329903	restauration					iNaturalist	Observations	iNaturalist research-grade observations		HUMAN_OBSERVATION				https://www.inaturalist.org/observations/178329903	178329903		restauration													PRESENT								T5/D27/Tr/O/249
4400020979				CC_BY_NC_4_0	2023-08-18T08:15:14Z		https://www.inaturalist.org/observations/178327740	restauration					iNaturalist	Observations	iNaturalist research-grade observations		HUMAN_OBSERVATION				https://www.inaturalist.org/observations/178327740	178327740		restauration													PRESENT								T4/D40/SD/G/183
4400019934				CC_BY_NC_4_0	2023-08-18T07:56:47Z		https://www.inaturalist.org/observations/178494189	restauration					iNaturalist	Observations	iNaturalist research-grade observations		HUMAN_OBSERVATION				https://www.inaturalist.org/observations/178494189	178494189		restauration													PRESENT								T14/D27/Tr+VAM/G/682
4400015787				CC_BY_NC_4_0	2023-08-18T08:03:58Z		https://www.inaturalist.org/observations/178333801	restauration					iNaturalist	Observations	iNaturalist research-grade observations		HUMAN_OBSERVATION				https://www.inaturalist.org/observations/178333801	178333801		restauration													PRESENT								T9/D27/SD+VAM/O/373
4400011820				CC_BY_NC_4_0	2023-08-18T07:58:59Z		https://www.inaturalist.org/observations/178490044	restauration					iNaturalist	Observations	iNaturalist research-grade observations		HUMAN_OBSERVATION				https://www.inaturalist.org/observations/178490044	178490044		restauration													PRESENT								T11/D40/SD+VAM/O/596
4400011787				CC_BY_NC_4_0	2023-08-18T08:10:40Z		https://www.inaturalist.org/observations/178330753	restauration					iNaturalist	Observations	iNaturalist research-grade observations		HUMAN_OBSERVATION				https://www.inaturalist.org/observations/178330753	178330753		restauration													PRESENT								T6/D27/Tr/G/303
4400004998				CC_BY_NC_4_0	2023-08-18T08:06:57Z		https://www.inaturalist.org/observations/178331783	restauration					iNaturalist	Observations	iNaturalist research-grade observations		HUMAN_OBSERVATION				https://www.inaturalist.org/observations/178331783	178331783		restauration													PRESENT								T6/D27/Tr/G/314
4400004876				CC_BY_NC_4_0	2023-08-22T13:33:59Z		https://www.inaturalist.org/observations/177470087	restauration					iNaturalist	Observations	iNaturalist research-grade observations		HUMAN_OBSERVATION				https://www.inaturalist.org/observations/177470087	177470087		restauration													PRESENT								T2/D27/SD/O/76
4399999793				CC_BY_NC_4_0	2023-08-22T13:15:08Z		https://www.inaturalist.org/observations/178496205	restauration					iNaturalist	Observations	iNaturalist research-grade observations		HUMAN_OBSERVATION				https://www.inaturalist.org/observations/178496205	178496205		restauration													PRESENT								T8/Polybag/SD/G/731
4399999757				CC_BY_NC_4_0	2023-08-18T08:07:06Z		https://www.inaturalist.org/observations/178331667	restauration					iNaturalist	Observations	iNaturalist research-grade observations		HUMAN_OBSERVATION				https://www.inaturalist.org/observations/178331667	178331667		restauration													PRESENT								T6/D27/Tr/G/311
4399999756				CC_BY_NC_4_0	2023-08-18T08:16:28Z		https://www.inaturalist.org/observations/178325628	restauration					iNaturalist	Observations	iNaturalist research-grade observations		HUMAN_OBSERVATION				https://www.inaturalist.org/observations/178325628	178325628		restauration													PRESENT								T2/D27/SD/G/117
4399999682				CC_BY_NC_4_0	2023-08-22T13:31:32Z		https://www.inaturalist.org/observations/177470664	restauration					iNaturalist	Observations	iNaturalist research-grade observations		HUMAN_OBSERVATION				https://www.inaturalist.org/observations/177470664	177470664		restauration													PRESENT								T2/D27/SD/O/61
4399998914				CC_BY_NC_4_0	2023-08-18T07:59:25Z		https://www.inaturalist.org/observations/178488987	restauration					iNaturalist	Observations	iNaturalist research-grade observations		HUMAN_OBSERVATION				https://www.inaturalist.org/observations/178488987	178488987		restauration													PRESENT								T11/D40/SD+VAM/O/506
4399998874				CC_BY_NC_4_0	2023-08-18T08:03:35Z		https://www.inaturalist.org/observations/178334734	restauration					iNaturalist	Observations	iNaturalist research-grade observations		HUMAN_OBSERVATION				https://www.inaturalist.org/observations/178334734	178334734		restauration													PRESENT								T10/D27/SD+VAM/G/424
4399998869				CC_BY_NC_4_0	2023-08-18T08:16:22Z		https://www.inaturalist.org/observations/178325725	restauration					iNaturalist	Observations	iNaturalist research-grade observations		HUMAN_OBSERVATION				https://www.inaturalist.org/observations/178325725	178325725		restauration													PRESENT								T2/D27/SD/G/119
4399997856				CC_BY_NC_4_0	2023-08-18T08:15:25Z		https://www.inaturalist.org/observations/178327221	restauration					iNaturalist	Observations	iNaturalist research-grade observations		HUMAN_OBSERVATION				https://www.inaturalist.org/observations/178327221	178327221		restauration													PRESENT								T3/D40/SD/O/157
4399996780				CC_BY_NC_4_0	2023-08-18T08:14:59Z		https://www.inaturalist.org/observations/178327959	restauration					iNaturalist	Observations	iNaturalist research-grade observations		HUMAN_OBSERVATION				https://www.inaturalist.org/observations/178327959	178327959		restauration													PRESENT								T4/D40/SD/G/189
4399994032				CC_BY_NC_4_0	2023-08-18T07:57:58Z		https://www.inaturalist.org/observations/178491041	restauration					iNaturalist	Observations	iNaturalist research-grade observations		HUMAN_OBSERVATION				https://www.inaturalist.org/observations/178491041	178491041		restauration													PRESENT								T12/D40/SD+VAM/G/582
4399994000				CC_BY_NC_4_0	2023-08-18T08:04:13Z		https://www.inaturalist.org/observations/178333235	restauration					iNaturalist	Observations	iNaturalist research-grade observations		HUMAN_OBSERVATION				https://www.inaturalist.org/observations/178333235	178333235		restauration													PRESENT								T9/D27/SD+VAM/O/366
4399993999				CC_BY_NC_4_0	2023-08-18T08:18:16Z		https://www.inaturalist.org/observations/178331255	restauration					iNaturalist	Observations	iNaturalist research-grade observations		HUMAN_OBSERVATION				https://www.inaturalist.org/observations/178331255	178331255		restauration													PRESENT								T6/D27/Tr/G/303
4399987672				CC_BY_NC_4_0	2023-08-22T13:34:52Z		https://www.inaturalist.org/observations/177468959	restauration					iNaturalist	Observations	iNaturalist research-grade observations		HUMAN_OBSERVATION				https://www.inaturalist.org/observations/177468959	177468959		restauration													PRESENT								T1/D27/SD/O/44
4399985918				CC_BY_NC_4_0	2023-08-18T08:03:46Z		https://www.inaturalist.org/observations/178334105	restauration					iNaturalist	Observations	iNaturalist research-grade observations		HUMAN_OBSERVATION				https://www.inaturalist.org/observations/178334105	178334105		restauration													PRESENT								T9/D27/SD+VAM/O/380
4399985914				CC_BY_NC_4_0	2023-08-18T08:16:17Z		https://www.inaturalist.org/observations/178325899	restauration					iNaturalist	Observations	iNaturalist research-grade observations		HUMAN_OBSERVATION				https://www.inaturalist.org/observations/178325899	178325899		restauration													PRESENT								T3/D40/SD/O/140
4399980594				CC_BY_NC_4_0	2023-08-18T07:57:03Z		https://www.inaturalist.org/observations/178493668	restauration					iNaturalist	Observations	iNaturalist research-grade observations		HUMAN_OBSERVATION				https://www.inaturalist.org/observations/178493668	178493668		restauration													PRESENT								621
4399980593				CC_BY_NC_4_0	2023-08-18T07:57:24Z		https://www.inaturalist.org/observations/178492975	restauration					iNaturalist	Observations	iNaturalist research-grade observations		HUMAN_OBSERVATION				https://www.inaturalist.org/observations/178492975	178492975		restauration													PRESENT								610
4399980577				CC_BY_NC_4_0	2023-08-18T08:09:36Z		https://www.inaturalist.org/observations/178330109	restauration					iNaturalist	Observations	iNaturalist research-grade observations		HUMAN_OBSERVATION				https://www.inaturalist.org/observations/178330109	178330109		restauration													PRESENT								T5/D27/Tr/O/253
4399979937				CC_BY_NC_4_0	2023-08-18T08:15:17Z		https://www.inaturalist.org/observations/178327695	restauration					iNaturalist	Observations	iNaturalist research-grade observations		HUMAN_OBSERVATION				https://www.inaturalist.org/observations/178327695	178327695		restauration													PRESENT								T4/D40/SD/G/181
4399977928				CC_BY_NC_4_0	2023-08-18T08:03:40Z		https://www.inaturalist.org/observations/178334633	restauration					iNaturalist	Observations	iNaturalist research-grade observations		HUMAN_OBSERVATION				https://www.inaturalist.org/observations/178334633	178334633		restauration													PRESENT								T10/D27/SD+VAM/G/422
4399977926				CC_BY_NC_4_0	2023-08-18T08:07:24Z		https://www.inaturalist.org/observations/178330871	restauration					iNaturalist	Observations	iNaturalist research-grade observations		HUMAN_OBSERVATION				https://www.inaturalist.org/observations/178330871	178330871		restauration													PRESENT								T6/D27/Tr/G/306
4399971741				CC_BY_NC_4_0	2023-08-18T07:53:22Z		https://www.inaturalist.org/observations/178494743	restauration					iNaturalist	Observations	iNaturalist research-grade observations		HUMAN_OBSERVATION				https://www.inaturalist.org/observations/178494743	178494743		restauration													PRESENT								T14/D27/Tr+VAM/G/670
4399971740				CC_BY_NC_4_0	2023-08-18T07:58:17Z		https://www.inaturalist.org/observations/178490783	restauration					iNaturalist	Observations	iNaturalist research-grade observations		HUMAN_OBSERVATION				https://www.inaturalist.org/observations/178490783	178490783		restauration													PRESENT								T12/D40/SD+VAM/G/553
4399971739				CC_BY_NC_4_0	2023-08-18T07:58:28Z		https://www.inaturalist.org/observations/178490585	restauration					iNaturalist	Observations	iNaturalist research-grade observations		HUMAN_OBSERVATION				https://www.inaturalist.org/observations/178490585	178490585		restauration													PRESENT								T12/D40/SD+VAM/G/549
4399969960				CC_BY_NC_4_0	2023-08-22T13:16:21Z		https://www.inaturalist.org/observations/178335682	restauration					iNaturalist	Observations	iNaturalist research-grade observations		HUMAN_OBSERVATION				https://www.inaturalist.org/observations/178335682	178335682		restauration													PRESENT								T11/D40/SD+VAM/O/481
4399969954				CC_BY_NC_4_0	2023-08-18T08:17:04Z		https://www.inaturalist.org/observations/178324693	restauration					iNaturalist	Observations	iNaturalist research-grade observations		HUMAN_OBSERVATION				https://www.inaturalist.org/observations/178324693	178324693		restauration													PRESENT								T2/D27/SD/G/102
4399965002				CC_BY_NC_4_0	2023-08-18T08:01:06Z		https://www.inaturalist.org/observations/178335018	restauration					iNaturalist	Observations	iNaturalist research-grade observations		HUMAN_OBSERVATION				https://www.inaturalist.org/observations/178335018	178335018		restauration													PRESENT								T10/D27/SD+VAM/G/431
4399962957				CC_BY_NC_4_0	2023-08-18T07:57:13Z		https://www.inaturalist.org/observations/178493254	restauration					iNaturalist	Observations	iNaturalist research-grade observations		HUMAN_OBSERVATION				https://www.inaturalist.org/observations/178493254	178493254		restauration													PRESENT								605
4399962913				CC_BY_NC_4_0	2023-08-18T08:15:01Z		https://www.inaturalist.org/observations/178327924	restauration					iNaturalist	Observations	iNaturalist research-grade observations		HUMAN_OBSERVATION				https://www.inaturalist.org/observations/178327924	178327924		restauration													PRESENT								T4/D40/SD/G/188
4399957849				CC_BY_NC_4_0	2023-08-18T08:00:48Z		https://www.inaturalist.org/observations/178335416	restauration					iNaturalist	Observations	iNaturalist research-grade observations		HUMAN_OBSERVATION				https://www.inaturalist.org/observations/178335416	178335416		restauration													PRESENT								T10/D27/SD+VAM/G/437
4399953856				CC_BY_NC_4_0	2023-08-18T07:57:32Z		https://www.inaturalist.org/observations/178492760	restauration					iNaturalist	Observations	iNaturalist research-grade observations		HUMAN_OBSERVATION				https://www.inaturalist.org/observations/178492760	178492760		restauration													PRESENT								655
4399953813				CC_BY_NC_4_0	2023-08-18T08:09:19Z		https://www.inaturalist.org/observations/178329608	restauration					iNaturalist	Observations	iNaturalist research-grade observations		HUMAN_OBSERVATION				https://www.inaturalist.org/observations/178329608	178329608		restauration													PRESENT								T5/D27/Tr/O/246
4399951778				CC_BY_NC_4_0	2023-08-18T08:04:15Z		https://www.inaturalist.org/observations/178333181	restauration					iNaturalist	Observations	iNaturalist research-grade observations		HUMAN_OBSERVATION				https://www.inaturalist.org/observations/178333181	178333181		restauration													PRESENT								T9/D27/SD+VAM/O/365
4399951777				CC_BY_NC_4_0	2023-08-22T13:19:10Z		https://www.inaturalist.org/observations/178333082	restauration					iNaturalist	Observations	iNaturalist research-grade observations		HUMAN_OBSERVATION				https://www.inaturalist.org/observations/178333082	178333082		restauration													PRESENT								T9/D27/SD+VAM/O/363
4399947843				CC_BY_NC_4_0	2023-08-18T07:59:33Z		https://www.inaturalist.org/observations/178488734	restauration					iNaturalist	Observations	iNaturalist research-grade observations		HUMAN_OBSERVATION				https://www.inaturalist.org/observations/178488734	178488734		restauration													PRESENT
4399947743				CC_BY_NC_4_0	2023-08-22T13:34:01Z		https://www.inaturalist.org/observations/177470013	restauration					iNaturalist	Observations	iNaturalist research-grade observations		HUMAN_OBSERVATION				https://www.inaturalist.org/observations/177470013	177470013		restauration													PRESENT								T2/D27/SD/O/78
4399946709				CC_BY_NC_4_0	2023-08-18T07:52:56Z		https://www.inaturalist.org/observations/178495701	restauration					iNaturalist	Observations	iNaturalist research-grade observations		HUMAN_OBSERVATION				https://www.inaturalist.org/observations/178495701	178495701		restauration													PRESENT								T8/Polybag/SD/G/763
4399943871				CC_BY_NC_4_0	2023-08-18T07:52:27Z		https://www.inaturalist.org/observations/178495950	restauration					iNaturalist	Observations	iNaturalist research-grade observations		HUMAN_OBSERVATION				https://www.inaturalist.org/observations/178495950	178495950		restauration													PRESENT								T8/Polybag/SD/G/766
4399923712				CC_BY_NC_4_0	2023-08-18T08:15:08Z		https://www.inaturalist.org/observations/178327828	restauration					iNaturalist	Observations	iNaturalist research-grade observations		HUMAN_OBSERVATION				https://www.inaturalist.org/observations/178327828	178327828		restauration													PRESENT								T4/D40/SD/G/185
4399922538				CC_BY_NC_4_0	2023-08-18T07:57:26Z		https://www.inaturalist.org/observations/178492938	restauration					iNaturalist	Observations	iNaturalist research-grade observations		HUMAN_OBSERVATION				https://www.inaturalist.org/observations/178492938	178492938		restauration													PRESENT								611
4399921617				CC_BY_NC_4_0	2023-08-18T08:07:10Z		https://www.inaturalist.org/observations/178331626	restauration					iNaturalist	Observations	iNaturalist research-grade observations		HUMAN_OBSERVATION				https://www.inaturalist.org/observations/178331626	178331626		restauration													PRESENT								T6/D27/Tr/G/310
4399920473				CC_BY_NC_4_0	2023-08-22T13:31:46Z		https://www.inaturalist.org/observations/177470638	restauration					iNaturalist	Observations	iNaturalist research-grade observations		HUMAN_OBSERVATION				https://www.inaturalist.org/observations/177470638	177470638		restauration													PRESENT								T2/D27/SD/O/62
4399920059				CC_BY_NC_4_0	2023-08-18T07:59:14Z		https://www.inaturalist.org/observations/178489179	restauration					iNaturalist	Observations	iNaturalist research-grade observations		HUMAN_OBSERVATION				https://www.inaturalist.org/observations/178489179	178489179		restauration													PRESENT								T11/D40/SD+VAM/O/514
4399920023				CC_BY_NC_4_0	2023-08-18T08:09:47Z		https://www.inaturalist.org/observations/178330174	restauration					iNaturalist	Observations	iNaturalist research-grade observations		HUMAN_OBSERVATION				https://www.inaturalist.org/observations/178330174	178330174		restauration													PRESENT								T5/D27/Tr/O/255
4399918996				CC_BY_NC_4_0	2023-08-18T08:03:33Z		https://www.inaturalist.org/observations/178334793	restauration					iNaturalist	Observations	iNaturalist research-grade observations		HUMAN_OBSERVATION				https://www.inaturalist.org/observations/178334793	178334793		restauration													PRESENT								T10/D27/SD+VAM/G/425
4399914988				CC_BY_NC_4_0	2023-08-18T08:10:38Z		https://www.inaturalist.org/observations/178330660	restauration					iNaturalist	Observations	iNaturalist research-grade observations		HUMAN_OBSERVATION				https://www.inaturalist.org/observations/178330660	178330660		restauration													PRESENT								T6/D27/Tr/G/302
4399914005				CC_BY_NC_4_0	2023-08-18T08:00:53Z		https://www.inaturalist.org/observations/178335354	restauration					iNaturalist	Observations	iNaturalist research-grade observations		HUMAN_OBSERVATION				https://www.inaturalist.org/observations/178335354	178335354		restauration													PRESENT								T10/D27/SD+VAM/G/435
4399914001				CC_BY_NC_4_0	2023-08-18T08:16:20Z		https://www.inaturalist.org/observations/178325751	restauration					iNaturalist	Observations	iNaturalist research-grade observations		HUMAN_OBSERVATION				https://www.inaturalist.org/observations/178325751	178325751		restauration													PRESENT								T2/D27/SD/G/120
4399912947				CC_BY_NC_4_0	2023-08-18T08:09:22Z		https://www.inaturalist.org/observations/178329727	restauration					iNaturalist	Observations	iNaturalist research-grade observations		HUMAN_OBSERVATION				https://www.inaturalist.org/observations/178329727	178329727		restauration													PRESENT								T5/D27/Tr/O/247
4399909545				CC_BY_NC_4_0	2023-08-18T07:53:24Z		https://www.inaturalist.org/observations/178494703	restauration					iNaturalist	Observations	iNaturalist research-grade observations		HUMAN_OBSERVATION				https://www.inaturalist.org/observations/178494703	178494703		restauration													PRESENT								T14/D27/Tr+VAM/G/669
4399905542				CC_BY_NC_4_0	2023-08-18T07:58:56Z		https://www.inaturalist.org/observations/178490259	restauration					iNaturalist	Observations	iNaturalist research-grade observations		HUMAN_OBSERVATION				https://www.inaturalist.org/observations/178490259	178490259		restauration													PRESENT								T12/D40/SD+VAM/G/541
4399904568				CC_BY_NC_4_0	2023-08-18T07:57:47Z		https://www.inaturalist.org/observations/178492458	restauration					iNaturalist	Observations	iNaturalist research-grade observations		HUMAN_OBSERVATION				https://www.inaturalist.org/observations/178492458	178492458		restauration													PRESENT								660
4399902753				CC_BY_NC_4_0	2023-08-18T07:58:20Z		https://www.inaturalist.org/observations/178490761	restauration					iNaturalist	Observations	iNaturalist research-grade observations		HUMAN_OBSERVATION				https://www.inaturalist.org/observations/178490761	178490761		restauration													PRESENT								T12/D40/SD+VAM/G/552
4399899742				CC_BY_NC_4_0	2023-08-18T08:09:08Z		https://www.inaturalist.org/observations/178329077	restauration					iNaturalist	Observations	iNaturalist research-grade observations		HUMAN_OBSERVATION				https://www.inaturalist.org/observations/178329077	178329077		restauration													PRESENT								T5/D27/Tr/O/241
4399897004				CC_BY_NC_4_0	2023-08-18T08:15:59Z		https://www.inaturalist.org/observations/178326663	restauration					iNaturalist	Observations	iNaturalist research-grade observations		HUMAN_OBSERVATION				https://www.inaturalist.org/observations/178326663	178326663		restauration													PRESENT								T3/D40/SD/O/128
4399896907				CC_BY_NC_4_0	2023-08-22T13:34:42Z		https://www.inaturalist.org/observations/177469224	restauration					iNaturalist	Observations	iNaturalist research-grade observations		HUMAN_OBSERVATION				https://www.inaturalist.org/observations/177469224	177469224		restauration													PRESENT								T1/D27/SD/O/52
4399896906				CC_BY_NC_4_0	2023-08-22T13:34:46Z		https://www.inaturalist.org/observations/177469026	restauration					iNaturalist	Observations	iNaturalist research-grade observations		HUMAN_OBSERVATION				https://www.inaturalist.org/observations/177469026	177469026		restauration													PRESENT								T1/D27/SD/O/46
4399896905				CC_BY_NC_4_0	2023-08-22T13:35:08Z		https://www.inaturalist.org/observations/177468630	restauration					iNaturalist	Observations	iNaturalist research-grade observations		HUMAN_OBSERVATION				https://www.inaturalist.org/observations/177468630	177468630		restauration													PRESENT								T2/D27/SD/O/22
4399889973				CC_BY_NC_4_0	2023-08-18T08:09:18Z		https://www.inaturalist.org/observations/178329577	restauration					iNaturalist	Observations	iNaturalist research-grade observations		HUMAN_OBSERVATION				https://www.inaturalist.org/observations/178329577	178329577		restauration													PRESENT								T5/D27/Tr/O/245
4399887886				CC_BY_NC_4_0	2023-08-18T08:08:58Z		https://www.inaturalist.org/observations/178328530	restauration					iNaturalist	Observations	iNaturalist research-grade observations		HUMAN_OBSERVATION				https://www.inaturalist.org/observations/178328530	178328530		restauration													PRESENT								T4/D40/SD/G/196
4399881850				CC_BY_NC_4_0	2023-08-18T08:06:38Z		https://www.inaturalist.org/observations/178332028	restauration					iNaturalist	Observations	iNaturalist research-grade observations		HUMAN_OBSERVATION				https://www.inaturalist.org/observations/178332028	178332028		restauration													PRESENT								T6/D27/Tr/G/320
4399879899				CC_BY_NC_4_0	2023-08-18T08:01:11Z		https://www.inaturalist.org/observations/178334931	restauration					iNaturalist	Observations	iNaturalist research-grade observations		HUMAN_OBSERVATION				https://www.inaturalist.org/observations/178334931	178334931		restauration													PRESENT								T10/D27/SD+VAM/G/428
4399879897				CC_BY_NC_4_0	2023-08-18T08:15:21Z		https://www.inaturalist.org/observations/178327308	restauration					iNaturalist	Observations	iNaturalist research-grade observations		HUMAN_OBSERVATION				https://www.inaturalist.org/observations/178327308	178327308		restauration													PRESENT								T3/D40/SD/O/179
4399878476				CC_BY_NC_4_0	2023-09-07T11:25:16Z		https://www.inaturalist.org/observations/178492749	restauration					iNaturalist	Observations	iNaturalist research-grade observations		HUMAN_OBSERVATION				https://www.inaturalist.org/observations/178492749	178492749		restauration													PRESENT								695
4399878475				CC_BY_NC_4_0	2023-08-18T07:58:09Z		https://www.inaturalist.org/observations/178490868	restauration					iNaturalist	Observations	iNaturalist research-grade observations		HUMAN_OBSERVATION				https://www.inaturalist.org/observations/178490868	178490868		restauration													PRESENT								T12/D40/SD+VAM/G/575
4399873491				CC_BY_NC_4_0	2023-08-18T07:57:00Z		https://www.inaturalist.org/observations/178493749	restauration					iNaturalist	Observations	iNaturalist research-grade observations		HUMAN_OBSERVATION				https://www.inaturalist.org/observations/178493749	178493749		restauration													PRESENT								T13/D27/Tr+VAM/O/601
4399871011				CC_BY_NC_4_0	2023-08-18T08:10:21Z		https://www.inaturalist.org/observations/178330362	restauration					iNaturalist	Observations	iNaturalist research-grade observations		HUMAN_OBSERVATION				https://www.inaturalist.org/observations/178330362	178330362		restauration													PRESENT								T5/D27/Tr/O/258
4399870902				CC_BY_NC_4_0	2023-08-22T13:33:58Z		https://www.inaturalist.org/observations/177470151	restauration					iNaturalist	Observations	iNaturalist research-grade observations		HUMAN_OBSERVATION				https://www.inaturalist.org/observations/177470151	177470151		restauration													PRESENT								T2/D27/SD/O/75
4399865696				CC_BY_NC_4_0	2023-08-18T08:04:09Z		https://www.inaturalist.org/observations/178333307	restauration					iNaturalist	Observations	iNaturalist research-grade observations		HUMAN_OBSERVATION				https://www.inaturalist.org/observations/178333307	178333307		restauration													PRESENT								T9/D27/SD+VAM/O/368
4399864517				CC_BY_NC_4_0	2023-08-18T07:58:15Z		https://www.inaturalist.org/observations/178490804	restauration					iNaturalist	Observations	iNaturalist research-grade observations		HUMAN_OBSERVATION				https://www.inaturalist.org/observations/178490804	178490804		restauration													PRESENT								T12/D40/SD+VAM/G/554
4399860797				CC_BY_NC_4_0	2023-08-18T07:53:14Z		https://www.inaturalist.org/observations/178495445	restauration					iNaturalist	Observations	iNaturalist research-grade observations		HUMAN_OBSERVATION				https://www.inaturalist.org/observations/178495445	178495445		restauration													PRESENT								T8/Polybag/SD/G/721
4399858915				CC_BY_NC_4_0	2023-08-18T08:08:49Z		https://www.inaturalist.org/observations/178328168	restauration					iNaturalist	Observations	iNaturalist research-grade observations		HUMAN_OBSERVATION				https://www.inaturalist.org/observations/178328168	178328168		restauration													PRESENT								T4/D40/SD/G/193
4399857995				CC_BY_NC_4_0	2023-08-18T08:00:59Z		https://www.inaturalist.org/observations/178335303	restauration					iNaturalist	Observations	iNaturalist research-grade observations		HUMAN_OBSERVATION				https://www.inaturalist.org/observations/178335303	178335303		restauration													PRESENT								T10/D27/SD+VAM/G/433
4399857888				CC_BY_NC_4_0	2023-08-22T13:34:19Z		https://www.inaturalist.org/observations/177469757	restauration					iNaturalist	Observations	iNaturalist research-grade observations		HUMAN_OBSERVATION				https://www.inaturalist.org/observations/177469757	177469757		restauration													PRESENT								T1/D27/SD/O/80
4399857887				CC_BY_NC_4_0	2023-08-22T13:34:21Z		https://www.inaturalist.org/observations/177469559	restauration					iNaturalist	Observations	iNaturalist research-grade observations		HUMAN_OBSERVATION				https://www.inaturalist.org/observations/177469559	177469559		restauration													PRESENT								T1/D27/SD/O/57
4399857027				CC_BY_NC_4_0	2023-08-22T13:18:02Z		https://www.inaturalist.org/observations/178335444	restauration					iNaturalist	Observations	iNaturalist research-grade observations		HUMAN_OBSERVATION				https://www.inaturalist.org/observations/178335444	178335444		restauration													PRESENT								T10/D27/SD+VAM/G/438
4399857025				CC_BY_NC_4_0	2023-08-18T08:07:17Z		https://www.inaturalist.org/observations/178331385	restauration					iNaturalist	Observations	iNaturalist research-grade observations		HUMAN_OBSERVATION				https://www.inaturalist.org/observations/178331385	178331385		restauration													PRESENT								T6/D27/Tr/G/308
4399856027				CC_BY_NC_4_0	2023-08-22T13:15:14Z		https://www.inaturalist.org/observations/178495990	restauration					iNaturalist	Observations	iNaturalist research-grade observations		HUMAN_OBSERVATION				https://www.inaturalist.org/observations/178495990	178495990		restauration													PRESENT								T8/Polybag/SD/G/768
4399855999				CC_BY_NC_4_0	2023-08-18T08:10:30Z		https://www.inaturalist.org/observations/178330451	restauration					iNaturalist	Observations	iNaturalist research-grade observations		HUMAN_OBSERVATION				https://www.inaturalist.org/observations/178330451	178330451		restauration													PRESENT								T5/D27/Tr/O/260
4399855998				CC_BY_NC_4_0	2023-08-18T08:09:29Z		https://www.inaturalist.org/observations/178329967	restauration					iNaturalist	Observations	iNaturalist research-grade observations		HUMAN_OBSERVATION				https://www.inaturalist.org/observations/178329967	178329967		restauration													PRESENT								T5/D27/Tr/O/250
4399855997				CC_BY_NC_4_0	2023-08-18T08:16:36Z		https://www.inaturalist.org/observations/178325501	restauration					iNaturalist	Observations	iNaturalist research-grade observations		HUMAN_OBSERVATION				https://www.inaturalist.org/observations/178325501	178325501		restauration													PRESENT								T2/D27/SD/G/113
439538930				CC_BY_4_0						http://grbio.org/institution/museum-national-dhistoire-naturelle			MNHN	P			PRESERVED_SPECIMEN				http://coldb.mnhn.fr/catalognumber/mnhn/p/p00724425	P00724425		Florence, J.													PRESENT	hb
439317925				CC_BY_4_0						http://grbio.org/institution/museum-national-dhistoire-naturelle			MNHN	P			PRESERVED_SPECIMEN				http://coldb.mnhn.fr/catalognumber/mnhn/p/p00724445	P00724445		Florence, J.													PRESENT	hb
439206033				CC_BY_4_0						http://grbio.org/institution/museum-national-dhistoire-naturelle			MNHN	P			PRESERVED_SPECIMEN				http://coldb.mnhn.fr/catalognumber/mnhn/p/p00724424	P00724424		Klein, H.													PRESENT	hb							reÃ§u le 27 avril 1935
439160996				CC_BY_4_0						http://grbio.org/institution/museum-national-dhistoire-naturelle			MNHN	P			PRESERVED_SPECIMEN				http://coldb.mnhn.fr/catalognumber/mnhn/p/p00389014	P00389014		Vermoesen, F.M.C.													PRESENT	hb
438959776				CC_BY_4_0						http://grbio.org/institution/museum-national-dhistoire-naturelle			MNHN	P			PRESERVED_SPECIMEN				http://coldb.mnhn.fr/catalognumber/mnhn/p/p00048832	P00048832		Du Puy, B.;Du Puy, D.;Ravonjiarisoa, P.													PRESENT	hb
438952294				CC_BY_4_0						http://grbio.org/institution/museum-national-dhistoire-naturelle			MNHN	P			PRESERVED_SPECIMEN				http://coldb.mnhn.fr/catalognumber/mnhn/p/p00287328	P00287328		s.c.													PRESENT	hb							Acquis en Novembre 1886
438902609				CC_BY_4_0						http://grbio.org/institution/museum-national-dhistoire-naturelle			MNHN	P			PRESERVED_SPECIMEN				http://coldb.mnhn.fr/catalognumber/mnhn/p/p00724426	P00724426		Gentry, A.H.													PRESENT	hb
438872361				CC_BY_4_0						http://grbio.org/institution/museum-national-dhistoire-naturelle			MNHN	P			PRESERVED_SPECIMEN				http://coldb.mnhn.fr/catalognumber/mnhn/p/p00724427	P00724427		Florence, J.													PRESENT	hb
438872360				CC_BY_4_0						http://grbio.org/institution/museum-national-dhistoire-naturelle			MNHN	P			PRESERVED_SPECIMEN				http://coldb.mnhn.fr/catalognumber/mnhn/p/p00724428	P00724428		Florence, J.													PRESENT	hb
438872359				CC_BY_4_0						http://grbio.org/institution/museum-national-dhistoire-naturelle			MNHN	P			PRESERVED_SPECIMEN				http://coldb.mnhn.fr/catalognumber/mnhn/p/p00724421	P00724421		Lecomte, H.													PRESENT	hb							ReÃ§u le 11 dÃ©cembre 1895
438650837				CC_BY_4_0						http://grbio.org/institution/museum-national-dhistoire-naturelle			MNHN	P			PRESERVED_SPECIMEN				http://coldb.mnhn.fr/catalognumber/mnhn/p/p00724442	P00724442		Klaine, T.J.													PRESENT	hb							DonnÃ© par M. L. Pierre, le 25 mars 1904
438650836				CC_BY_4_0						http://grbio.org/institution/museum-national-dhistoire-naturelle			MNHN	P			PRESERVED_SPECIMEN				http://coldb.mnhn.fr/catalognumber/mnhn/p/p00724444	P00724444		Klaine, T.J.													PRESENT	hb							DonnÃ© par M. L. Pierre, le 25 mars 1904
438618606				CC_BY_4_0						http://grbio.org/institution/museum-national-dhistoire-naturelle			MNHN	P			PRESERVED_SPECIMEN				http://coldb.mnhn.fr/catalognumber/mnhn/p/p00287327	P00287327		Commerson, P.													PRESENT	hb							Acquis en Novembre 1886
438582507				CC_BY_4_0						http://grbio.org/institution/museum-national-dhistoire-naturelle			MNHN	P			PRESERVED_SPECIMEN				http://coldb.mnhn.fr/catalognumber/mnhn/p/p00724440	P00724440		HallÃ©, N.;Le Thomas, A.													PRESENT	hb							Mission Biol. Gabon, dir. P.P. GrassÃ©
438538916				CC_BY_4_0						http://grbio.org/institution/museum-national-dhistoire-naturelle			MNHN	P			PRESERVED_SPECIMEN				http://coldb.mnhn.fr/catalognumber/mnhn/p/p00724439	P00724439		Pauly, A.													PRESENT	hb
437985068				CC_BY_4_0						http://grbio.org/institution/museum-national-dhistoire-naturelle			MNHN	P			PRESERVED_SPECIMEN				http://coldb.mnhn.fr/catalognumber/mnhn/p/p00724441	P00724441		Klaine, T.J.													PRESENT	hb							DonnÃ© par M. L. Pierre, le 25 mars 1904
437916723				CC_BY_4_0						http://grbio.org/institution/museum-national-dhistoire-naturelle			MNHN	P			PRESERVED_SPECIMEN				http://coldb.mnhn.fr/catalognumber/mnhn/p/p00724446	P00724446		HallÃ©, N.													PRESENT	hb
437652137				CC_BY_4_0						http://grbio.org/institution/museum-national-dhistoire-naturelle			MNHN	P			PRESERVED_SPECIMEN				http://coldb.mnhn.fr/catalognumber/mnhn/p/p00389013	P00389013		Mann, G.													PRESENT	hb
437540377				CC_BY_4_0						http://grbio.org/institution/museum-national-dhistoire-naturelle			MNHN	P			PRESERVED_SPECIMEN				http://coldb.mnhn.fr/catalognumber/mnhn/p/p00724443	P00724443		HallÃ©, N.;Villiers, J.F.													PRESENT	hb
437287563				CC_BY_4_0						http://grbio.org/institution/museum-national-dhistoire-naturelle			MNHN	P			PRESERVED_SPECIMEN				http://coldb.mnhn.fr/catalognumber/mnhn/p/p030723	P030723		Commerson, P.													PRESENT	hb
437287562				CC_BY_4_0						http://grbio.org/institution/museum-national-dhistoire-naturelle			MNHN	P			PRESERVED_SPECIMEN				http://coldb.mnhn.fr/catalognumber/mnhn/p/p00287326	P00287326		[Commerson], [P.]													PRESENT	hb							Acquis en Novembre 1886
437251237				CC_BY_4_0						http://grbio.org/institution/museum-national-dhistoire-naturelle			MNHN	P			PRESERVED_SPECIMEN				http://coldb.mnhn.fr/catalognumber/mnhn/p/p00724437	P00724437		HallÃ©, N.													PRESENT	hb							Mission Biol. Gabon, dir. P.P. GrassÃ©
437207698				CC_BY_4_0						http://grbio.org/institution/museum-national-dhistoire-naturelle			MNHN	P			PRESERVED_SPECIMEN				http://coldb.mnhn.fr/catalognumber/mnhn/p/p00724423	P00724423		I.N.E.F.													PRESENT	hb
4177535913				CC_BY_NC_4_0	2023-08-18T08:17:58Z		https://www.inaturalist.org/observations/178324576	restauration					iNaturalist	Observations	iNaturalist research-grade observations		HUMAN_OBSERVATION				https://www.inaturalist.org/observations/178324576	178324576		restauration													PRESENT								T2/D27/SD/G/101
4177496473				CC_BY_NC_4_0	2023-08-18T08:15:49Z		https://www.inaturalist.org/observations/178326870	restauration					iNaturalist	Observations	iNaturalist research-grade observations		HUMAN_OBSERVATION				https://www.inaturalist.org/observations/178326870	178326870		restauration													PRESENT								K_B (January 2023)
4177215809				CC_BY_NC_4_0	2023-08-11T10:07:03Z		https://www.inaturalist.org/observations/177469580	restauration					iNaturalist	Observations	iNaturalist research-grade observations		HUMAN_OBSERVATION				https://www.inaturalist.org/observations/177469580	177469580		restauration													PRESENT								T1/D27/SD/O/58
4165473921				CC_BY_NC_4_0	2023-07-25T08:42:21Z		https://www.inaturalist.org/observations/173803961	David Rabehevitra					iNaturalist	Observations	iNaturalist research-grade observations		HUMAN_OBSERVATION				https://www.inaturalist.org/observations/173803961	173803961		David Rabehevitra													PRESENT								Young tree, 1.5m, common.
4162473319				CC_BY_NC_4_0	2023-07-14T12:45:00Z		https://www.inaturalist.org/observations/172637834	nomentsoa					iNaturalist	Observations	iNaturalist research-grade observations		HUMAN_OBSERVATION				https://www.inaturalist.org/observations/172637834	172637834		nomentsoa													PRESENT								Arongana
4162208290				CC_BY_NC_4_0	2023-07-19T10:16:03Z		https://www.inaturalist.org/observations/172638018	nomentsoa					iNaturalist	Observations	iNaturalist research-grade observations		HUMAN_OBSERVATION				https://www.inaturalist.org/observations/172638018	172638018		nomentsoa													PRESENT
4144834313		http://www.tropicos.org/Specimen/103337628		CC_BY_4_0				Missouri Botanical Garden	PhysicalObject		http://biocol.org/urn:lsid:biocol.org:col:15859		MO	Tropicos	Tropicos	MOBOT	PRESERVED_SPECIMEN				urn:catalog:MO:Tropicos:103337628	103337628	Mbading Mbading 709	Wilfried Mbading Mbading;Jean de Dieu Kaparidi;Anne-HÃ©lÃ¨ne Paradis;Axelle Vouma		2											PRESENT
4144818308		http://www.tropicos.org/Specimen/103337627		CC_BY_4_0				Missouri Botanical Garden	PhysicalObject		http://biocol.org/urn:lsid:biocol.org:col:15859		LBV	Tropicos	Tropicos	MOBOT	PRESERVED_SPECIMEN				urn:catalog:MO:Tropicos:103337627	103337627	Mbading Mbading 709	Wilfried Mbading Mbading;Jean de Dieu Kaparidi;Anne-HÃ©lÃ¨ne Paradis;Axelle Vouma		2											PRESENT
4133167336		http://www.tropicos.org/Specimen/103333324		CC_BY_4_0				Missouri Botanical Garden	PhysicalObject		http://biocol.org/urn:lsid:biocol.org:col:15859		MO	Tropicos	Tropicos	MOBOT	PRESERVED_SPECIMEN				urn:catalog:MO:Tropicos:103333324	103333324	Antilahimena 8940	P. Antilahimena		5											PRESENT
4132984319		http://www.tropicos.org/Specimen/103333322		CC_BY_4_0				Missouri Botanical Garden	PhysicalObject		http://biocol.org/urn:lsid:biocol.org:col:15859		TAN	Tropicos	Tropicos	MOBOT	PRESERVED_SPECIMEN				urn:catalog:MO:Tropicos:103333322	103333322	Antilahimena 8940	P. Antilahimena		5											PRESENT
4132977329		http://www.tropicos.org/Specimen/103333323		CC_BY_4_0				Missouri Botanical Garden	PhysicalObject		http://biocol.org/urn:lsid:biocol.org:col:15859		P	Tropicos	Tropicos	MOBOT	PRESERVED_SPECIMEN				urn:catalog:MO:Tropicos:103333323	103333323	Antilahimena 8940	P. Antilahimena		5											PRESENT
4131563885				CC_BY_4_0	2023-07-16T07:02:03Z		https://portal.torcherbaria.org/portal/collections/individual/index.php?occid=31111936	Botanical Research Institute of Texas			fea81a47-2365-45cc-bef9-b6bbff7457e6		BRIT	BRIT			PRESERVED_SPECIMEN				1f77cc9b-16c3-4922-855b-9034906af46f	BRIT867100															PRESENT
4130479308				CC_BY_4_0						http://grbio.org/institution/museum-national-dhistoire-naturelle			MNHN	P			PRESERVED_SPECIMEN				http://coldb.mnhn.fr/catalognumber/mnhn/p/p01138096	P01138096		Miandrimanana, C.;&, al.													PRESENT	hb
4130472305				CC_BY_4_0						http://grbio.org/institution/museum-national-dhistoire-naturelle			MNHN	P			PRESERVED_SPECIMEN				http://coldb.mnhn.fr/catalognumber/mnhn/p/p01090472	P01090472		Letsara, R.													PRESENT	hb
4122292313				CC0_1_0	2023-04-18T15:47:00Z					urn:lsid:biocol.org:col:15463	urn:uuid:60e28f81-e634-4869-aa3e-732caed713c8		US	US	NMNH Extant Biology		PRESERVED_SPECIMEN				http://n2t.net/ark:/65665/321cec9d6-52b3-46a5-8adb-37819d303391		2551	D. Nguema, G. Moussavou & H. Memiaghe		1											PRESENT
4122279356				CC0_1_0	2023-04-18T15:47:00Z					urn:lsid:biocol.org:col:15463	urn:uuid:60e28f81-e634-4869-aa3e-732caed713c8		US	US	NMNH Extant Biology		PRESERVED_SPECIMEN				http://n2t.net/ark:/65665/363cfb035-74b8-4f03-9196-508955fb246a		2647	D. Nguema, G. Moussavou & H. Memiaghe		1											PRESENT
4122253418				CC0_1_0	2023-04-18T15:46:00Z					urn:lsid:biocol.org:col:15463	urn:uuid:60e28f81-e634-4869-aa3e-732caed713c8		US	US	NMNH Extant Biology		PRESERVED_SPECIMEN				http://n2t.net/ark:/65665/3e8b87262-477d-4d67-abc8-b395807c1767		2417	D. Nguema, G. Moussavou & H. Memiaghe		1											PRESENT
4122247446				CC0_1_0	2023-04-18T15:47:00Z					urn:lsid:biocol.org:col:15463	urn:uuid:60e28f81-e634-4869-aa3e-732caed713c8		US	US	NMNH Extant Biology		PRESERVED_SPECIMEN				http://n2t.net/ark:/65665/3f866e6f7-6467-4db9-9791-5ffdb01690d5		2564	D. Nguema, G. Moussavou & H. Memiaghe		1											PRESENT
4101506303		http://www.tropicos.org/Specimen/103309982		CC_BY_4_0				Missouri Botanical Garden	PhysicalObject		http://biocol.org/urn:lsid:biocol.org:col:15859		TAN	Tropicos	Tropicos	MOBOT	PRESERVED_SPECIMEN				urn:catalog:MO:Tropicos:103309982	103309982	Razafindraibe 186	M. Razafindraibe		1											PRESENT
4093056359				CC_BY_4_0													PRESERVED_SPECIMEN				FloraAmeaÃ§ada-TRST 1115		TRST1115	Dilson Madre Deus;Angela Lima;Pascoal Sousa;Lewis Eduardo;EstevÃ£o Soares;AntÃ³nio Camuenha													PRESENT								Corpo com pequenas fissuras, corte da casca apresenta cor castanho, lÃ¡tex cor de laranja, cerne branco
4092769225				CC_BY_4_0													PRESERVED_SPECIMEN				FloraAmeaÃ§ada-TRST 796		TRST796	Dilson Madre Deus;Angela Lima;Diosdado Nguema;Pascoal Sousa;EstevÃ£o Soares;AntÃ³nio "MalÃ©" Cabangala;Dimas;Samuel													PRESENT								lÃ¡tex de cor laranja, corte da casca apresenta cor laranja, cerne branco
4092768976				CC_BY_4_0													PRESERVED_SPECIMEN				FloraAmeaÃ§ada-TRST 1019		TRST1019	Dilson Madre Deus;Pascoal Sousa;EstevÃ£o Soares;Lewis Eduardo													PRESENT								sem lÃ¡tex, corte da casca apresenta cor vermelha, tronco rugoso com botÃµes, cerne barnco
4092768780				CC_BY_4_0													PRESERVED_SPECIMEN				FloraAmeaÃ§ada-TRST 31		TRST31	Laura Benitez;Anaximenes Nascimento;TomÃ© de Almeida;EstevÃ£o Soares;Gabriel Oquiongo;Franscisco AlamÃ³;Davy Ikabanga;Davide Dias;Ana Sofia SimÃµes;Susana GonÃ§alves													PRESENT								folha e casca, lÃ¡tex vermalho
4092768339				CC_BY_4_0													PRESERVED_SPECIMEN				FloraAmeaÃ§ada-TRST 187		TRST187	Tariq StÃ©vart;Laura Benitez;Dilson Madre Deus;Pascoal Sousa;AntÃ³nio Camuenha													PRESENT								corte da casca de cor acastanha avermelhada
4092178488	https://creativecommons.org/licenses/by-nc/4.0/legalcode			CC_BY_NC_4_0						4c5bf646-457d-431d-b055-6c27f468ff0a			STPH	STPH			PRESERVED_SPECIMEN				4df5cf94-937b-4cb3-8142-aa6cf7c69409	2112		Oliveira, Faustino de													PRESENT	Sheet - 1
4092178402	https://creativecommons.org/licenses/by-nc/4.0/legalcode			CC_BY_NC_4_0						4c5bf646-457d-431d-b055-6c27f468ff0a			STPH	STPH			PRESERVED_SPECIMEN				4b22a86f-72c7-4e4d-b8d4-932c466cc1ee	2113		Oliveira, Faustino de													PRESENT	Sheet - 1
4081242320				CC_BY_4_0						http://grbio.org/institution/museum-national-dhistoire-naturelle			MNHN	P			PRESERVED_SPECIMEN				http://coldb.mnhn.fr/catalognumber/mnhn/p/p00877624	P00877624		Dupuy, D.													PRESENT	hb
4074966379		http://www.tropicos.org/Specimen/103301594		CC_BY_4_0				Missouri Botanical Garden	PhysicalObject		http://biocol.org/urn:lsid:biocol.org:col:15859		SERG	Tropicos	Tropicos	MOBOT	PRESERVED_SPECIMEN				urn:catalog:MO:Tropicos:103301594	103301594	Transects 2472	Transects GuinÃ©e;Moussa DiabatÃ©;Faya Julien Simbiano;Lansana KonatÃ©		2											PRESENT
4074965379		http://www.tropicos.org/Specimen/103301413		CC_BY_4_0				Missouri Botanical Garden	PhysicalObject		http://biocol.org/urn:lsid:biocol.org:col:15859		BRLU	Tropicos	Tropicos	MOBOT	PRESERVED_SPECIMEN				urn:catalog:MO:Tropicos:103301413	103301413	Transects 2384	Transects GuinÃ©e;Moussa DiabatÃ©;Faya Julien Simbiano;Lansana KonatÃ©		2											PRESENT
4074964378		http://www.tropicos.org/Specimen/103301412		CC_BY_4_0				Missouri Botanical Garden	PhysicalObject		http://biocol.org/urn:lsid:biocol.org:col:15859		SERG	Tropicos	Tropicos	MOBOT	PRESERVED_SPECIMEN				urn:catalog:MO:Tropicos:103301412	103301412	Transects 2384	Transects GuinÃ©e;Moussa DiabatÃ©;Faya Julien Simbiano;Lansana KonatÃ©		2											PRESENT
4074963378		http://www.tropicos.org/Specimen/103301307		CC_BY_4_0				Missouri Botanical Garden	PhysicalObject		http://biocol.org/urn:lsid:biocol.org:col:15859		BRLU	Tropicos	Tropicos	MOBOT	PRESERVED_SPECIMEN				urn:catalog:MO:Tropicos:103301307	103301307	Transects 2329	Transects GuinÃ©e;Moussa DiabatÃ©;Faya Julien Simbiano;Lansana KonatÃ©		2											PRESENT
4074963376		http://www.tropicos.org/Specimen/103301280		CC_BY_4_0				Missouri Botanical Garden	PhysicalObject		http://biocol.org/urn:lsid:biocol.org:col:15859		SERG	Tropicos	Tropicos	MOBOT	PRESERVED_SPECIMEN				urn:catalog:MO:Tropicos:103301280	103301280	Transects 2317	Transects GuinÃ©e;Moussa DiabatÃ©;Faya Julien Simbiano;Lansana KonatÃ©		2											PRESENT
4074963371		http://www.tropicos.org/Specimen/103301170		CC_BY_4_0				Missouri Botanical Garden	PhysicalObject		http://biocol.org/urn:lsid:biocol.org:col:15859		SERG	Tropicos	Tropicos	MOBOT	PRESERVED_SPECIMEN				urn:catalog:MO:Tropicos:103301170	103301170	Transects 2263	Transects GuinÃ©e;Moussa DiabatÃ©;Faya Julien Simbiano;Lansana KonatÃ©		2											PRESENT
4074962369		http://www.tropicos.org/Specimen/103301234		CC_BY_4_0				Missouri Botanical Garden	PhysicalObject		http://biocol.org/urn:lsid:biocol.org:col:15859		SERG	Tropicos	Tropicos	MOBOT	PRESERVED_SPECIMEN				urn:catalog:MO:Tropicos:103301234	103301234	Transects 2294	Transects GuinÃ©e;Moussa DiabatÃ©;Faya Julien Simbiano;Lansana KonatÃ©		2											PRESENT
4074961372		http://www.tropicos.org/Specimen/103301281		CC_BY_4_0				Missouri Botanical Garden	PhysicalObject		http://biocol.org/urn:lsid:biocol.org:col:15859		BRLU	Tropicos	Tropicos	MOBOT	PRESERVED_SPECIMEN				urn:catalog:MO:Tropicos:103301281	103301281	Transects 2317	Transects GuinÃ©e;Moussa DiabatÃ©;Faya Julien Simbiano;Lansana KonatÃ©		2											PRESENT
4074961367		http://www.tropicos.org/Specimen/103301171		CC_BY_4_0				Missouri Botanical Garden	PhysicalObject		http://biocol.org/urn:lsid:biocol.org:col:15859		BRLU	Tropicos	Tropicos	MOBOT	PRESERVED_SPECIMEN				urn:catalog:MO:Tropicos:103301171	103301171	Transects 2263	Transects GuinÃ©e;Moussa DiabatÃ©;Faya Julien Simbiano;Lansana KonatÃ©		2											PRESENT
4074956393		http://www.tropicos.org/Specimen/103301595		CC_BY_4_0				Missouri Botanical Garden	PhysicalObject		http://biocol.org/urn:lsid:biocol.org:col:15859		BRLU	Tropicos	Tropicos	MOBOT	PRESERVED_SPECIMEN				urn:catalog:MO:Tropicos:103301595	103301595	Transects 2472	Transects GuinÃ©e;Moussa DiabatÃ©;Faya Julien Simbiano;Lansana KonatÃ©		2											PRESENT
4074954369		http://www.tropicos.org/Specimen/103301235		CC_BY_4_0				Missouri Botanical Garden	PhysicalObject		http://biocol.org/urn:lsid:biocol.org:col:15859		BRLU	Tropicos	Tropicos	MOBOT	PRESERVED_SPECIMEN				urn:catalog:MO:Tropicos:103301235	103301235	Transects 2294	Transects GuinÃ©e;Moussa DiabatÃ©;Faya Julien Simbiano;Lansana KonatÃ©		2											PRESENT
4074952366		http://www.tropicos.org/Specimen/103301306		CC_BY_4_0				Missouri Botanical Garden	PhysicalObject		http://biocol.org/urn:lsid:biocol.org:col:15859		SERG	Tropicos	Tropicos	MOBOT	PRESERVED_SPECIMEN				urn:catalog:MO:Tropicos:103301306	103301306	Transects 2329	Transects GuinÃ©e;Moussa DiabatÃ©;Faya Julien Simbiano;Lansana KonatÃ©		2											PRESENT
4073223108				CC_BY_4_0	1967-12-31T00:00:00Z		http://www.botanicalcollections.be/specimen/BR0000022745583	Meise Botanic Garden	PhysicalObject	http://biocol.org/urn:lsid:biocol.org:col:15605	gbif:ih:irn:124997		MeiseBG	BR	Meise Botanic Garden Herbarium		PRESERVED_SPECIMEN				http://www.botanicalcollections.be/specimen/BR0000022745583	BR0000022745583	S904	Billiet F.	http://viaf.org/viaf/284058110												PRESENT	HerbariumSheet
4072856449				CC_BY_4_0	2022-09-22T00:00:00Z		http://www.botanicalcollections.be/specimen/BR0000005602230	Meise Botanic Garden	PhysicalObject	http://biocol.org/urn:lsid:biocol.org:col:15605	gbif:ih:irn:124997		MeiseBG	BR	Meise Botanic Garden Herbarium		PRESERVED_SPECIMEN				http://www.botanicalcollections.be/specimen/BR0000005602230	BR0000005602230	3778	PÃ©rez Viso R.	http://www.wikidata.org/entity/Q62990355												PRESENT	HerbariumSheet
4072254858				CC_BY_4_0													HUMAN_OBSERVATION				P3 M12AA 1_288					2	2	individuals									PRESENT
4072254851				CC_BY_4_0													HUMAN_OBSERVATION				P3 N3 1 09_1104					2	2	individuals									PRESENT
4072254827				CC_BY_4_0													HUMAN_OBSERVATION				P8 N3 1 08_1171					1	1	individuals									PRESENT
4072254823				CC_BY_4_0													HUMAN_OBSERVATION				P5 Parcelle5 6 02_3404					1	1	individuals									PRESENT
4072254793				CC_BY_4_0													HUMAN_OBSERVATION				P1 M12Y 1_98					1	1	individuals									PRESENT
4072254756				CC_BY_4_0													HUMAN_OBSERVATION				T1 M15A 1 06_625					1	1	individuals									PRESENT
4072254755				CC_BY_4_0													HUMAN_OBSERVATION				T1 M44A 1 _534					14	14	individuals									PRESENT
4072254735				CC_BY_4_0													HUMAN_OBSERVATION				P2 parcelleB 1 06_2859					1	1	individuals									PRESENT
4072254725				CC_BY_4_0													HUMAN_OBSERVATION				P2 M12BE 1_201					3	3	individuals									PRESENT
4072254698				CC_BY_4_0													HUMAN_OBSERVATION				P1 N5 1 08_1143					13	13	individuals									PRESENT
4072254641				CC_BY_4_0													HUMAN_OBSERVATION				P1 M42C 3_107					4	4	individuals									PRESENT
4072254593				CC_BY_4_0													HUMAN_OBSERVATION				P3 M12AM 1_292					11	11	individuals									PRESENT
4072254536				CC_BY_4_0													HUMAN_OBSERVATION				P1 M17G 1 06_2368					1	1	individuals									PRESENT
4072254453				CC_BY_4_0													HUMAN_OBSERVATION				P5 M12R 1 06_3319					3	3	individuals									PRESENT
4072254449				CC_BY_4_0													HUMAN_OBSERVATION				T2 V170L 1-1_1311					1	1	individuals									PRESENT
4072254409				CC_BY_4_0													HUMAN_OBSERVATION				P1 M12BI 1_89					3	3	individuals									PRESENT
4072254392				CC_BY_4_0													HUMAN_OBSERVATION				P1 M49A 1_116					5	5	individuals									PRESENT
4072254372				CC_BY_4_0													HUMAN_OBSERVATION				P4 parcelleB 1 06_3300					3	3	individuals									PRESENT
4072254345				CC_BY_4_0													HUMAN_OBSERVATION				P3 M12R 1 06_2897					2	2	individuals									PRESENT
4072254292				CC_BY_4_0													HUMAN_OBSERVATION				P6 M12BI 1_451					1	1	individuals									PRESENT
4072254253				CC_BY_4_0													HUMAN_OBSERVATION				P1 M12AA 1 _71					3	3	individuals									PRESENT
4072254220				CC_BY_4_0													HUMAN_OBSERVATION				P2 M12R 1 06_2603					1	1	individuals									PRESENT
4072254194				CC_BY_4_0													HUMAN_OBSERVATION				P1 M42C 1 _102					2	2	individuals									PRESENT
4072254183				CC_BY_4_0													HUMAN_OBSERVATION				P1 Parcelle5 5 02_2504					1	1	individuals									PRESENT
4072254173				CC_BY_4_0													HUMAN_OBSERVATION				P2 M42I 1_216					1	1	individuals									PRESENT
4072254162				CC_BY_4_0													HUMAN_OBSERVATION				P3 Parcelle2 1 02_3009					1	1	individuals									PRESENT
4072254111				CC_BY_4_0													HUMAN_OBSERVATION				P4 M12I 3 06_3116					4	4	individuals									PRESENT
4072254108				CC_BY_4_0													HUMAN_OBSERVATION				P3 parcelleB 1 06_3105					2	2	individuals									PRESENT
4072254067				CC_BY_4_0													HUMAN_OBSERVATION				P1 M154AD 3 10_2315					1	1	individuals									PRESENT
4072253937				CC_BY_4_0													HUMAN_OBSERVATION				P2 parcelleA 1 06_2851					11	11	individuals									PRESENT
4072253862				CC_BY_4_0													HUMAN_OBSERVATION				P2 M12AI 1 _199					1	1	individuals									PRESENT
4072253856				CC_BY_4_0													HUMAN_OBSERVATION				P1 M12BI 2_90					5	5	individuals									PRESENT
4072253848				CC_BY_4_0													HUMAN_OBSERVATION				T1 N3 1 09_1113					2	2	individuals									PRESENT
4072253724				CC_BY_4_0													HUMAN_OBSERVATION				P5 M12F 1 06_772					1	1	individuals									PRESENT
4072253661				CC_BY_4_0													HUMAN_OBSERVATION				P4 M12AA 1_378					5	5	individuals									PRESENT
4072253594				CC_BY_4_0													HUMAN_OBSERVATION				P1 M12AI 1_79					2	2	individuals									PRESENT
4072253553				CC_BY_4_0													HUMAN_OBSERVATION				P7 M12F 1 06_793					2	2	individuals									PRESENT
4072253448				CC_BY_4_0													HUMAN_OBSERVATION				P2 M12? 1 06_688					5	5	individuals									PRESENT
4072253441				CC_BY_4_0													HUMAN_OBSERVATION				P1 M12AM 1_85					6	6	individuals									PRESENT
4072253361				CC_BY_4_0													HUMAN_OBSERVATION				P2 M12I 1 06_703					1	1	individuals									PRESENT
4072253303				CC_BY_4_0													HUMAN_OBSERVATION				P3 M12BE 1_299					2	2	individuals									PRESENT
4072253284				CC_BY_4_0													HUMAN_OBSERVATION				P6 M154AC 1 10_3451					1	1	individuals									PRESENT
4072253190				CC_BY_4_0													HUMAN_OBSERVATION				P5 M17G 1 06_3364					7	7	individuals									PRESENT
4072253130				CC_BY_4_0													HUMAN_OBSERVATION				P2 M42C 1_211					2	2	individuals									PRESENT
4072253128				CC_BY_4_0													HUMAN_OBSERVATION				P1 M12AA 2_75					3	3	individuals									PRESENT
4072253113				CC_BY_4_0													HUMAN_OBSERVATION				P1 M12BJ 1_94					9	9	individuals									PRESENT
4072253096				CC_BY_4_0													HUMAN_OBSERVATION				P3 N2 1 08_1155					1	1	individuals									PRESENT
4072253086				CC_BY_4_0													HUMAN_OBSERVATION				P1 Parcelle3 1 02_2422					1	1	individuals									PRESENT
4072253048				CC_BY_4_0													HUMAN_OBSERVATION				P2 M12BJ 1_206					5	5	individuals									PRESENT
4072252986				CC_BY_4_0													HUMAN_OBSERVATION				P8 M12S 1 06_3556					4	4	individuals									PRESENT
4072252916				CC_BY_4_0													HUMAN_OBSERVATION				P3 MO264 1_317					3	3	individuals									PRESENT
4072252868				CC_BY_4_0													HUMAN_OBSERVATION				P3 N4 1 08_1157					6	6	individuals									PRESENT
4072252832				CC_BY_4_0													HUMAN_OBSERVATION				P2 Parcelle5 4 02_2803					1	1	individuals									PRESENT
4072252794				CC_BY_4_0													HUMAN_OBSERVATION				P3 M12F 1 06_721					1	1	individuals									PRESENT
4072252770				CC_BY_4_0													HUMAN_OBSERVATION				T2 Parcelle1 6 02_897					1	1	individuals									PRESENT
4072252766				CC_BY_4_0													HUMAN_OBSERVATION				P7 M12 Y 1_461					7	7	individuals									PRESENT
4072252717				CC_BY_4_0													HUMAN_OBSERVATION				P3 parcelleA 1 06_3101					1	1	individuals									PRESENT
4072252660				CC_BY_4_0													HUMAN_OBSERVATION				T1 N5 1 08_1177					3	3	individuals									PRESENT
4072252588				CC_BY_4_0													HUMAN_OBSERVATION				T1 M12BJ 1_501					7	7	individuals									PRESENT
4072252552				CC_BY_4_0													HUMAN_OBSERVATION				P5 111F 1_411					1	1	individuals									PRESENT
4072252548				CC_BY_4_0													HUMAN_OBSERVATION				P5 N5 1 08_1165					1	1	individuals									PRESENT
4072252537				CC_BY_4_0													HUMAN_OBSERVATION				T1 M12AA 1 _472					1	1	individuals									PRESENT
4072252482				CC_BY_4_0													HUMAN_OBSERVATION				T1 M12AI 1_481					2	2	individuals									PRESENT
4072252464				CC_BY_4_0													HUMAN_OBSERVATION				P2 N1 1 08_1145					1	1	individuals									PRESENT
4072252458				CC_BY_4_0													HUMAN_OBSERVATION				P5 parcelleB 1 06_3427					11	11	individuals									PRESENT
4072252111				CC_BY_4_0													HUMAN_OBSERVATION				P6 N3 1 08_1169					2	2	individuals									PRESENT
4072252110				CC_BY_4_0													HUMAN_OBSERVATION				P1 M12I 1 06_669					1	1	individuals									PRESENT
4072252054				CC_BY_4_0													HUMAN_OBSERVATION				P2 N7 1 08_1153					1	1	individuals									PRESENT
4072252022				CC_BY_4_0													HUMAN_OBSERVATION				P2 Parcelle4 1 02_2747					1	1	individuals									PRESENT
4072251982				CC_BY_4_0													HUMAN_OBSERVATION				T2 M12BI 1_564					1	1	individuals									PRESENT
4072251961				CC_BY_4_0													HUMAN_OBSERVATION				P2 M12E 1 06_694					5	5	individuals									PRESENT
4072251936				CC_BY_4_0													HUMAN_OBSERVATION				T1 N1 1 09_1108					1	1	individuals									PRESENT
4072251866				CC_BY_4_0													HUMAN_OBSERVATION				P1 M12I 1 06_648					5	5	individuals									PRESENT
4072251794				CC_BY_4_0													HUMAN_OBSERVATION				P4 M12F 1 06_747					3	3	individuals									PRESENT
4072251749				CC_BY_4_0													HUMAN_OBSERVATION				T1 M12Y 1_810					7	7	individuals									PRESENT
4072251740				CC_BY_4_0													HUMAN_OBSERVATION				P1 N4 1 08_1141					4	4	individuals									PRESENT
4072251738				CC_BY_4_0													HUMAN_OBSERVATION				P3 M12 Y 1_284					5	5	individuals									PRESENT
4072251660				CC_BY_4_0													HUMAN_OBSERVATION				P4 M12R 1 06_3144					2	2	individuals									PRESENT
4072251582				CC_BY_4_0													HUMAN_OBSERVATION				P1 M12BI 3_92					1	1	individuals									PRESENT
4072251495				CC_BY_4_0													HUMAN_OBSERVATION				P5 M12S 1 06_3323					1	1	individuals									PRESENT
4072251479				CC_BY_4_0													HUMAN_OBSERVATION				P2 N5 1 08_1151					3	3	individuals									PRESENT
4072251342				CC_BY_4_0													HUMAN_OBSERVATION				P3 M42C 3_312					1	1	individuals									PRESENT
4072251338				CC_BY_4_0													HUMAN_OBSERVATION				P1 N2 1 08_1140					1	1	individuals									PRESENT
4071191324		http://www.tropicos.org/Specimen/103295197		CC_BY_4_0				Missouri Botanical Garden	PhysicalObject		http://biocol.org/urn:lsid:biocol.org:col:15859		MO	Tropicos	Tropicos	MOBOT	PRESERVED_SPECIMEN				urn:catalog:MO:Tropicos:103295197	103295197	Haba 602	Ouo-Ouo Haba;Moussa DiabatÃ©;Lansana KonatÃ©		3											PRESENT
4071158320		http://www.tropicos.org/Specimen/103295198		CC_BY_4_0				Missouri Botanical Garden	PhysicalObject		http://biocol.org/urn:lsid:biocol.org:col:15859		BRLU	Tropicos	Tropicos	MOBOT	PRESERVED_SPECIMEN				urn:catalog:MO:Tropicos:103295198	103295198	Haba 602	Ouo-Ouo Haba;Moussa DiabatÃ©;Lansana KonatÃ©		3											PRESENT
4071145328		http://www.tropicos.org/Specimen/103295196		CC_BY_4_0				Missouri Botanical Garden	PhysicalObject		http://biocol.org/urn:lsid:biocol.org:col:15859		SERG	Tropicos	Tropicos	MOBOT	PRESERVED_SPECIMEN				urn:catalog:MO:Tropicos:103295196	103295196	Haba 602	Ouo-Ouo Haba;Moussa DiabatÃ©;Lansana KonatÃ©		3											PRESENT
4066550279				CC_BY_4_0									LBV				PRESERVED_SPECIMEN				162739-BID-AF-2020-040-REG			Schoenmaker J.													PRESENT		donated from LBV
4066549147				CC_BY_4_0									LBV				PRESERVED_SPECIMEN				160642-BID-AF-2020-040-REG			Nek													PRESENT		donated from LBV
4066549127				CC_BY_4_0									LBV				PRESERVED_SPECIMEN				160477-BID-AF-2020-040-REG			Nek													PRESENT		donated from LBV
4066545695				CC_BY_4_0									TOGO				PRESERVED_SPECIMEN				133934-BID-AF-2020-040-REG	TOGO03924		Guelly													PRESENT		donated from TOGO
4066544690				CC_BY_4_0									TOGO				PRESERVED_SPECIMEN				133933-BID-AF-2020-040-REG	TOGO03923		Guelly													PRESENT		donated from TOGO
4066532302				CC_BY_4_0									YA				PRESERVED_SPECIMEN				96534-BID-AF-2020-040-REG	YA0049824		Meijer W.						Fruiting							PRESENT		donated from YA
4066528276				CC_BY_4_0									YA				PRESERVED_SPECIMEN				96362-BID-AF-2020-040-REG	YA0049702		sans nom de collecteur													PRESENT		donated from Ya
4066528266				CC_BY_4_0									YA				PRESERVED_SPECIMEN				96285-BID-AF-2020-040-REG	YA0049440		Manning S.D.													PRESENT		donated from YA
4066528256				CC_BY_4_0									YA				PRESERVED_SPECIMEN				96205-BID-AF-2020-040-REG	YA0049420		Geerling C.													PRESENT		donated from YA
4066528255				CC_BY_4_0									YA				PRESERVED_SPECIMEN				96197-BID-AF-2020-040-REG	YA0049413		Bamps P.R.J.													PRESENT		donated from YA
4066527272				CC_BY_4_0									YA				PRESERVED_SPECIMEN				96284-BID-AF-2020-040-REG	YA0049439		Thomas D.W.													PRESENT		donated from YA
4066527271				CC_BY_4_0									YA				PRESERVED_SPECIMEN				96273-BID-AF-2020-040-REG	YA0049434		van der Zon A.P.M.													PRESENT		donated from YA
4066527265				CC_BY_4_0									YA				PRESERVED_SPECIMEN				96237-BID-AF-2020-040-REG	YA0049424		Leeuwenberg A.J.M.													PRESENT		donated from YA
4066527263				CC_BY_4_0									YA				PRESERVED_SPECIMEN				96215-BID-AF-2020-040-REG	YA0049711		Mbarga A.													PRESENT		donated from Ya
4066527262				CC_BY_4_0									YA				PRESERVED_SPECIMEN				96204-BID-AF-2020-040-REG	YA0049419		Fotius													PRESENT		donated from YA
4066527261				CC_BY_4_0									YA				PRESERVED_SPECIMEN				96196-BID-AF-2020-040-REG	YA0049412		C.N.A.D.													PRESENT		donated from YA
4066525251				CC_BY_4_0									YA				PRESERVED_SPECIMEN				96528-BID-AF-2020-040-REG	YA0049821		Letouzey R.													PRESENT		donated from YA
4066525230				CC_BY_4_0									YA				PRESERVED_SPECIMEN				96366-BID-AF-2020-040-REG	YA0049694		sans nom de collecteur													PRESENT		donated from Ya
4066525219				CC_BY_4_0									YA				PRESERVED_SPECIMEN				96281-BID-AF-2020-040-REG	YA0049437		Mikio													PRESENT		donated from YA
4066525218				CC_BY_4_0									YA				PRESERVED_SPECIMEN				96278-BID-AF-2020-040-REG	YA0049436		Hoshino													PRESENT		donated from YA
4066525216				CC_BY_4_0									YA				PRESERVED_SPECIMEN				96267-BID-AF-2020-040-REG	YA0049430		Asonganyi J.N.													PRESENT		donated from YA
4066525213				CC_BY_4_0									YA				PRESERVED_SPECIMEN				96234-BID-AF-2020-040-REG	YA0049423		Webb J.													PRESENT		donated from YA
4066525211				CC_BY_4_0									YA				PRESERVED_SPECIMEN				96212-BID-AF-2020-040-REG	YA0049714		Nana P.													PRESENT		donated from Ya
4066525210				CC_BY_4_0									YA				PRESERVED_SPECIMEN				96209-BID-AF-2020-040-REG	YA0049717		Mpom B.													PRESENT		donated from Ya
4066525209				CC_BY_4_0									YA				PRESERVED_SPECIMEN				96201-BID-AF-2020-040-REG	YA0049417		inconnu													PRESENT		donated from YA
4066520945				CC_BY_4_0									UCJ				PRESERVED_SPECIMEN				4649113-BID-AF-2020-040-REG	UCJ008609		AkÃ© Assi L.													PRESENT		donated from UCJ
4066518045				CC_BY_4_0									LBV				PRESERVED_SPECIMEN				1457742-BID-AF-2020-040-REG			Simons													PRESENT		donated from LBV
4066516981				CC_BY_4_0									UCJ				PRESERVED_SPECIMEN				4649112-BID-AF-2020-040-REG	UCJ008608		AkÃ© Assi L.													PRESENT		donated from UCJ
4066511549				CC_BY_4_0									LBV				PRESERVED_SPECIMEN				1538961-BID-AF-2020-040-REG			StÃ©vart													PRESENT		donated from LBV
4066510819				CC_BY_4_0									LBV				PRESERVED_SPECIMEN				364226-BID-AF-2020-040-REG			Wieringa J.J.													PRESENT		donated from LBV
4066510282				CC_BY_4_0									LBV				PRESERVED_SPECIMEN				1457988-BID-AF-2020-040-REG			Damen T.H.J.													PRESENT		donated from LBV
4066509888				CC_BY_4_0									LBV				PRESERVED_SPECIMEN				1346327-BID-AF-2020-040-REG			Sita													PRESENT		donated from LBV
4066505981				CC_BY_4_0									LBV				PRESERVED_SPECIMEN				1399588-BID-AF-2020-040-REG			Nguema Ekomo													PRESENT		donated from LBV
4066505232				CC_BY_4_0									LBV				PRESERVED_SPECIMEN				332975-BID-AF-2020-040-REG			Walters													PRESENT		donated from LBV
4066504675				CC_BY_4_0									LBV				PRESERVED_SPECIMEN				308198-BID-AF-2020-040-REG			Thomas D.W.													PRESENT		donated from LBV
4066503088				CC_BY_4_0									LBV				PRESERVED_SPECIMEN				366762-BID-AF-2020-040-REG			Niangadouma													PRESENT		donated from LBV
4066503054				CC_BY_4_0									LBV				PRESERVED_SPECIMEN				364977-BID-AF-2020-040-REG			Wieringa J.J.													PRESENT		donated from LBV
4066502645				CC_BY_4_0									LBV				PRESERVED_SPECIMEN				340609-BID-AF-2020-040-REG			Bourobou H.P.													PRESENT		donated from LBV
4066501691				CC_BY_4_0									LBV				PRESERVED_SPECIMEN				350065-BID-AF-2020-040-REG			Wilks													PRESENT		donated from LBV
4066501550				CC_BY_4_0									LBV				PRESERVED_SPECIMEN				335677-BID-AF-2020-040-REG	LBV0001672		Ngok Banak L.													PRESENT		donated from LBV
4066498781				CC_BY_4_0									LBV				PRESERVED_SPECIMEN				190566-BID-AF-2020-040-REG			Wieringa J.J.													PRESENT		donated from LBV
4066497054				CC_BY_4_0									LBV				PRESERVED_SPECIMEN				310376-BID-AF-2020-040-REG			Sosef													PRESENT		donated from LBV
4066496906				CC_BY_4_0									LBV				PRESERVED_SPECIMEN				308245-BID-AF-2020-040-REG			Thomas D.W.													PRESENT		donated from LBV
4066496383				CC_BY_4_0									LBV				PRESERVED_SPECIMEN				237680-BID-AF-2020-040-REG			Louis A.M.													PRESENT		donated from LBV
4066494768				CC_BY_4_0									LBV				PRESERVED_SPECIMEN				300774-BID-AF-2020-040-REG			Wilde (WALK-B)													PRESENT		donated from LBV
4066494625				CC_BY_4_0									LBV				PRESERVED_SPECIMEN				292653-BID-AF-2020-040-REG			Wilde (WALK-B)													PRESENT		donated from LBV
4066492143				CC_BY_4_0									LBV				PRESERVED_SPECIMEN				169793-BID-AF-2020-040-REG			Breteler F.J.													PRESENT		donated from LBV
4066491848				CC_BY_4_0									LBV				PRESERVED_SPECIMEN				162442-BID-AF-2020-040-REG			Schoenmaker J.													PRESENT		donated from LBV
4066489288				CC_BY_4_0									LBV				PRESERVED_SPECIMEN				237007-BID-AF-2020-040-REG			Louis A.M.													PRESENT		donated from LBV
4066488919				CC_BY_4_0									LBV				PRESERVED_SPECIMEN				185483-BID-AF-2020-040-REG			Reitsma J.M.													PRESENT		donated from LBV
4066488765				CC_BY_4_0									LBV				PRESERVED_SPECIMEN				177651-BID-AF-2020-040-REG			Louis A.M.													PRESENT		donated from LBV
4066488712				CC_BY_4_0									LBV				PRESERVED_SPECIMEN				176474-BID-AF-2020-040-REG			Leeuwenberg													PRESENT		donated from LBV
4066488656				CC_BY_4_0									LBV				PRESERVED_SPECIMEN				175877-BID-AF-2020-040-REG			Breteler F.J.													PRESENT		donated from LBV
4066488405				CC_BY_4_0									LBV				PRESERVED_SPECIMEN				169731-BID-AF-2020-040-REG			Breteler F.J.													PRESENT		donated from LBV
4066487845				CC_BY_4_0									LBV				PRESERVED_SPECIMEN				180430-BID-AF-2020-040-REG			Wieringa J.J.													PRESENT		donated from LBV
4066485892				CC_BY_4_0									HNB				PRESERVED_SPECIMEN				6360084-BID-AF-2020-040-REG	WAG0278182		Akoegninou													PRESENT		donated from WAG
4066479189				CC_BY_4_0									LBV				PRESERVED_SPECIMEN				161208-BID-AF-2020-040-REG			de Wilde J.J.F.E.													PRESENT		donated from LBV
4066478223				CC_BY_4_0									LBV				PRESERVED_SPECIMEN				162103-BID-AF-2020-040-REG			Bos J.J.													PRESENT		donated from LBV
4066469666				CC_BY_4_0									TOGO				PRESERVED_SPECIMEN				133935-BID-AF-2020-040-REG	TOGO03925		Brunel J.-F.													PRESENT		donated from TOGO
4066467687				CC_BY_4_0									TOGO				PRESERVED_SPECIMEN				133932-BID-AF-2020-040-REG	TOGO03922		Guelly													PRESENT		donated from TOGO
4066462033				CC_BY_4_0									YA				PRESERVED_SPECIMEN				111257-BID-AF-2020-040-REG	YA0061713		Betti J. L.													PRESENT		donated from YA
4066445276				CC_BY_4_0									YA				PRESERVED_SPECIMEN				96530-BID-AF-2020-040-REG	YA0049822		Letouzey R.													PRESENT		donated from YA
4066445245				CC_BY_4_0									YA				PRESERVED_SPECIMEN				96288-BID-AF-2020-040-REG	YA0049442		Onana J.-M.													PRESENT		donated from YA
4066445243				CC_BY_4_0									YA				PRESERVED_SPECIMEN				96277-BID-AF-2020-040-REG	YA0049435		van der Zon A.P.M.													PRESENT		donated from YA
4066445242				CC_BY_4_0									YA				PRESERVED_SPECIMEN				96266-BID-AF-2020-040-REG	YA0049429		Beentje H.J.													PRESENT		donated from YA
4066445236				CC_BY_4_0									YA				PRESERVED_SPECIMEN				96211-BID-AF-2020-040-REG	YA0049715		Ndongo													PRESENT		donated from YA
4066445235				CC_BY_4_0									YA				PRESERVED_SPECIMEN				96208-BID-AF-2020-040-REG	YA0049422		Lowe J.													PRESENT		donated from YA
4066445234				CC_BY_4_0									YA				PRESERVED_SPECIMEN				96200-BID-AF-2020-040-REG	YA0049416		Nditapah													PRESENT		donated from YA
4066445233				CC_BY_4_0									YA				PRESERVED_SPECIMEN				96192-BID-AF-2020-040-REG	YA0049409		Surville													PRESENT		donated from YA
4066445232				CC_BY_4_0									YA				PRESERVED_SPECIMEN				96189-BID-AF-2020-040-REG	YA0049406		Endengle E.													PRESENT		donated from YA
4066442287				CC_BY_4_0									YA				PRESERVED_SPECIMEN				96532-BID-AF-2020-040-REG	YA0049823		Breyne H.													PRESENT		donated from YA
4066442251				CC_BY_4_0									YA				PRESERVED_SPECIMEN				96271-BID-AF-2020-040-REG	YA0049432		Leeuwenberg A.J.M.													PRESENT		donated from YA
4066442244				CC_BY_4_0									YA				PRESERVED_SPECIMEN				96213-BID-AF-2020-040-REG	YA0049713		Nana P.													PRESENT		donated from Ya
4066442243				CC_BY_4_0									YA				PRESERVED_SPECIMEN				96202-BID-AF-2020-040-REG	YA0049418		inconnu													PRESENT		donated from YA
4066442242				CC_BY_4_0									YA				PRESERVED_SPECIMEN				96194-BID-AF-2020-040-REG	YA0049410		inconnu													PRESENT		donated from YA
4066441255				CC_BY_4_0									YA				PRESERVED_SPECIMEN				96364-BID-AF-2020-040-REG	YA0049695		sans nom de collecteur													PRESENT		donated from Ya
4066441246				CC_BY_4_0									YA				PRESERVED_SPECIMEN				96290-BID-AF-2020-040-REG	YA0049443		Onana J.-M.													PRESENT		donated from YA
4066441245				CC_BY_4_0									YA				PRESERVED_SPECIMEN				96287-BID-AF-2020-040-REG	YA0049441		Manning S.D.													PRESENT		donated from YA
4066441236				CC_BY_4_0									YA				PRESERVED_SPECIMEN				96210-BID-AF-2020-040-REG	YA0049716		Nana P.													PRESENT		donated from Ya
4066441235				CC_BY_4_0									YA				PRESERVED_SPECIMEN				96207-BID-AF-2020-040-REG	YA0049421		Lowe J.													PRESENT		donated from YA
4066441234				CC_BY_4_0									YA				PRESERVED_SPECIMEN				96199-BID-AF-2020-040-REG	YA0049415		Mbenkum													PRESENT		donated from YA
4066441233				CC_BY_4_0									YA				PRESERVED_SPECIMEN				96191-BID-AF-2020-040-REG	YA0049408		Raynal J.													PRESENT		donated from YA
4066441232				CC_BY_4_0									YA				PRESERVED_SPECIMEN				96188-BID-AF-2020-040-REG	YA0049405		Letouzey R.													PRESENT		donated from YA
4066440283				CC_BY_4_0									YA				PRESERVED_SPECIMEN				96536-BID-AF-2020-040-REG	YA0049825		van der Burgt													PRESENT		donated from YA
4066440252				CC_BY_4_0									YA				PRESERVED_SPECIMEN				96264-BID-AF-2020-040-REG	YA0049428		Goetghebeur													PRESENT		donated from YA
4066440249				CC_BY_4_0									YA				PRESERVED_SPECIMEN				96239-BID-AF-2020-040-REG	YA0049425		de Wilde J.J.F.E.													PRESENT		donated from YA
4066440244				CC_BY_4_0									YA				PRESERVED_SPECIMEN				96206-BID-AF-2020-040-REG	YA0049718		Bena P.													PRESENT		donated from Ya
4066440243				CC_BY_4_0									YA				PRESERVED_SPECIMEN				96198-BID-AF-2020-040-REG	YA0049414		Bos J.J.													PRESENT		donated from YA
4066440242				CC_BY_4_0									YA				PRESERVED_SPECIMEN				96190-BID-AF-2020-040-REG	YA0049407		Breteler F.J.													PRESENT		donated from YA
4066438258				CC_BY_4_0									YA				PRESERVED_SPECIMEN				96283-BID-AF-2020-040-REG	YA0049438		Thomas D.W.													PRESENT		donated from YA
4066438257				CC_BY_4_0									YA				PRESERVED_SPECIMEN				96272-BID-AF-2020-040-REG	YA0049433		Thomas D.													PRESENT		donated from YA
4066438256				CC_BY_4_0									YA				PRESERVED_SPECIMEN				96269-BID-AF-2020-040-REG	YA0049431		Leeuwenberg A.J.M.													PRESENT		donated from YA
4066438255				CC_BY_4_0									YA				PRESERVED_SPECIMEN				96261-BID-AF-2020-040-REG	YA0049427		Leeuwenberg A.J.M.													PRESENT		donated from YA
4066438254				CC_BY_4_0									YA				PRESERVED_SPECIMEN				96258-BID-AF-2020-040-REG	YA0049426		Leeuwenberg A.J.M.													PRESENT		donated from YA
4066438249				CC_BY_4_0									YA				PRESERVED_SPECIMEN				96214-BID-AF-2020-040-REG	YA0049712		Mbarga A.													PRESENT		donated from Ya
4066438248				CC_BY_4_0									YA				PRESERVED_SPECIMEN				96203-BID-AF-2020-040-REG	YA0049719		Tchoungui F.													PRESENT		donated from Ya
4066438247				CC_BY_4_0									YA				PRESERVED_SPECIMEN				96195-BID-AF-2020-040-REG	YA0049411		Ndi S.													PRESENT		donated from YA
4066436000				CC_BY_4_0									UCJ				PRESERVED_SPECIMEN				4649110-BID-AF-2020-040-REG	UCJ008606		J. MiÃ¨ge & L. AkÃ© Assi													PRESENT		donated from UCJ
4066434496				CC_BY_4_0									LBV				PRESERVED_SPECIMEN				1570758-BID-AF-2020-040-REG			Mouandza Mbembo													PRESENT		donated from LBV
4066427980				CC_BY_4_0									UCJ				PRESERVED_SPECIMEN				4649111-BID-AF-2020-040-REG	UCJ008607		sans collecteur													PRESENT		donated from UCJ
4066425378				CC_BY_4_0									LBV				PRESERVED_SPECIMEN				1465234-BID-AF-2020-040-REG			Towns													PRESENT		donated from LBV
4066425332				CC_BY_4_0									LBV				PRESERVED_SPECIMEN				1462316-BID-AF-2020-040-REG			Quiroz-Villarreal													PRESENT		donated from LBV
4066424866				CC_BY_4_0									LBV				PRESERVED_SPECIMEN				1439347-BID-AF-2020-040-REG			Raymakers													PRESENT		donated from LBV
4066424651				CC_BY_4_0									LBV				PRESERVED_SPECIMEN				1346328-BID-AF-2020-040-REG			Boussiengui Nongo J.													PRESENT		donated from LBV
4066424650				CC_BY_4_0									LBV				PRESERVED_SPECIMEN				1346320-BID-AF-2020-040-REG			Gauchotte													PRESENT		donated from LBV
4066423118				CC_BY_4_0									LBV				PRESERVED_SPECIMEN				1465229-BID-AF-2020-040-REG			Towns													PRESENT		donated from LBV
4066422654				CC_BY_4_0									LBV				PRESERVED_SPECIMEN				1346322-BID-AF-2020-040-REG			Durand													PRESENT		donated from LBV
4066422653				CC_BY_4_0									LBV				PRESERVED_SPECIMEN				1346319-BID-AF-2020-040-REG			Boussiengui Nongo J.													PRESENT		donated from LBV
4066421685				CC_BY_4_0									LBV				PRESERVED_SPECIMEN				1346321-BID-AF-2020-040-REG			Estasse													PRESENT		donated from LBV
4066421684				CC_BY_4_0									LBV				PRESERVED_SPECIMEN				1346318-BID-AF-2020-040-REG			Moungazi													PRESENT		donated from LBV
4066421482				CC_BY_4_0									LBV				PRESERVED_SPECIMEN				1294909-BID-AF-2020-040-REG			Walters													PRESENT		donated from LBV
4066417332				CC_BY_4_0									LBV				PRESERVED_SPECIMEN				1465103-BID-AF-2020-040-REG			Towns													PRESENT		donated from LBV
4066417326				CC_BY_4_0									LBV				PRESERVED_SPECIMEN				1465048-BID-AF-2020-040-REG			Towns													PRESENT		donated from LBV
4066414450				CC_BY_4_0									LBV				PRESERVED_SPECIMEN				350156-BID-AF-2020-040-REG	LBV0003586		Wieringa J.J.													PRESENT		donated from LBV
4066412877				CC_BY_4_0									LBV				PRESERVED_SPECIMEN				1320012-BID-AF-2020-040-REG			White													PRESENT		donated from LBV
4066412589				CC_BY_4_0									LBV				PRESERVED_SPECIMEN				1189945-BID-AF-2020-040-REG			Wieringa J.J.													PRESENT		donated from LBV
4066408734				CC_BY_4_0									LBV				PRESERVED_SPECIMEN				363322-BID-AF-2020-040-REG	LBV0003414		Niangadouma													PRESENT		donated from LBV
4066408697				CC_BY_4_0									LBV				PRESERVED_SPECIMEN				359549-BID-AF-2020-040-REG			Wilks													PRESENT		donated from LBV
4066401720				CC_BY_4_0									LBV				PRESERVED_SPECIMEN				309682-BID-AF-2020-040-REG			Wilks													PRESENT		donated from LBV
4066401634				CC_BY_4_0									LBV				PRESERVED_SPECIMEN				307501-BID-AF-2020-040-REG	LBV0004572		Louis A.M.													PRESENT		donated from LBV
4066400673				CC_BY_4_0									LBV				PRESERVED_SPECIMEN				308335-BID-AF-2020-040-REG			White													PRESENT		donated from LBV
4066399657				CC_BY_4_0									LBV				PRESERVED_SPECIMEN				340456-BID-AF-2020-040-REG			Bourobou H.P.													PRESENT		donated from LBV
4066399495				CC_BY_4_0									LBV				PRESERVED_SPECIMEN				332987-BID-AF-2020-040-REG	LBV0003531		Niangadouma													PRESENT		donated from LBV
4066399494				CC_BY_4_0									LBV				PRESERVED_SPECIMEN				332976-BID-AF-2020-040-REG			Walters													PRESENT		donated from LBV
4066399493				CC_BY_4_0									LBV				PRESERVED_SPECIMEN				332965-BID-AF-2020-040-REG			Bradley A.F.													PRESENT		donated from LBV
4066398925				CC_BY_4_0									LBV				PRESERVED_SPECIMEN				311460-BID-AF-2020-040-REG			Florence J.													PRESENT		donated from LBV
4066397470				CC_BY_4_0									LBV				PRESERVED_SPECIMEN				332988-BID-AF-2020-040-REG	LBV0003518		Niangadouma													PRESENT		donated from LBV
4066390874				CC_BY_4_0									LBV				PRESERVED_SPECIMEN				307187-BID-AF-2020-040-REG			Louis A.M.													PRESENT		donated from LBV
4066389912				CC_BY_4_0									LBV				PRESERVED_SPECIMEN				226682-BID-AF-2020-040-REG			de Wilde J.J.F.E.													PRESENT		donated from LBV
4066389830				CC_BY_4_0									LBV				PRESERVED_SPECIMEN				208774-BID-AF-2020-040-REG			Breteler F.J.													PRESENT		donated from LBV
4066389621				CC_BY_4_0									LBV				PRESERVED_SPECIMEN				183435-BID-AF-2020-040-REG			van Bergen M.A.													PRESENT		donated from LBV
4066389546				CC_BY_4_0									LBV				PRESERVED_SPECIMEN				178950-BID-AF-2020-040-REG			Louis A.M.													PRESENT		donated from LBV
4066389499				CC_BY_4_0									LBV				PRESERVED_SPECIMEN				177322-BID-AF-2020-040-REG			Louis A.M.													PRESENT		donated from LBV
4066389281				CC_BY_4_0									LBV				PRESERVED_SPECIMEN				277049-BID-AF-2020-040-REG			Lowry II													PRESENT		donated from LBV
4066388827				CC_BY_4_0									LBV				PRESERVED_SPECIMEN				190641-BID-AF-2020-040-REG			Wieringa J.J.													PRESENT		donated from LBV
4066388803				CC_BY_4_0									LBV				PRESERVED_SPECIMEN				188961-BID-AF-2020-040-REG			Reitsma J.M.													PRESENT		donated from LBV
4066388139				CC_BY_4_0									LBV				PRESERVED_SPECIMEN				312872-BID-AF-2020-040-REG			Florence J.													PRESENT		donated from LBV
4066388073				CC_BY_4_0									LBV				PRESERVED_SPECIMEN				310595-BID-AF-2020-040-REG			Sosef													PRESENT		donated from LBV
4066387843				CC_BY_4_0									LBV				PRESERVED_SPECIMEN				307122-BID-AF-2020-040-REG			Louis A.M.													PRESENT		donated from LBV
4066387173				CC_BY_4_0									LBV				PRESERVED_SPECIMEN				227259-BID-AF-2020-040-REG			Breteler F.J.													PRESENT		donated from LBV
4066386912				CC_BY_4_0									LBV				PRESERVED_SPECIMEN				184774-BID-AF-2020-040-REG			de Wilde J.J.F.E.													PRESENT		donated from LBV
4066386899				CC_BY_4_0									LBV				PRESERVED_SPECIMEN				184631-BID-AF-2020-040-REG			de Wilde J.J.F.E.													PRESENT		donated from LBV
4066386727				CC_BY_4_0									LBV				PRESERVED_SPECIMEN				177011-BID-AF-2020-040-REG			Leeuwenberg													PRESENT		donated from LBV
4066386177				CC_BY_4_0									LBV				PRESERVED_SPECIMEN				227247-BID-AF-2020-040-REG			Breteler F.J.													PRESENT		donated from LBV
4066386003				CC_BY_4_0									LBV				PRESERVED_SPECIMEN				188964-BID-AF-2020-040-REG			Reitsma J.M.													PRESENT		donated from LBV
4066385912				CC_BY_4_0									LBV				PRESERVED_SPECIMEN				185521-BID-AF-2020-040-REG			Reitsma J.M.													PRESENT		donated from LBV
4066385504				CC_BY_4_0									LBV				PRESERVED_SPECIMEN				172277-BID-AF-2020-040-REG			Breteler F.J.													PRESENT		donated from LBV
4066385156				CC_BY_4_0									LBV				PRESERVED_SPECIMEN				167786-BID-AF-2020-040-REG			Breteler F.J.													PRESENT		donated from LBV
4066384744				CC_BY_4_0									LBV				PRESERVED_SPECIMEN				160237-BID-AF-2020-040-REG			Nek													PRESENT		donated from LBV
4066384256				CC_BY_4_0									LBV				PRESERVED_SPECIMEN				172550-BID-AF-2020-040-REG			Breteler F.J.													PRESENT		donated from LBV
4066383440				CC_BY_4_0									HNG				PRESERVED_SPECIMEN				150448-BID-AF-2020-040-REG	HNG0000439		KeÃ¯ta S,M, DorÃ© T,S, Sow B,													PRESENT		donated from HNG
4066383159				CC_BY_4_0									LBV				PRESERVED_SPECIMEN				168984-BID-AF-2020-040-REG			Breteler F.J.													PRESENT		donated from LBV
4066383007				CC_BY_4_0									LBV				PRESERVED_SPECIMEN				163918-BID-AF-2020-040-REG			Breteler F.J.													PRESENT		donated from LBV
4066382840				CC_BY_4_0									LBV				PRESERVED_SPECIMEN				161853-BID-AF-2020-040-REG			Wieringa J.J.													PRESENT		donated from LBV
4063308457	https://creativecommons.org/licenses/by-nc/4.0/legalcode			CC_BY_NC_4_0						4c5bf646-457d-431d-b055-6c27f468ff0a			STPH	STPH			PRESERVED_SPECIMEN				dcb0c823-72d7-4d31-b0e1-d151d917f9d6	2847		Paiva, Jorge													PRESENT	Sheet - 1
4062222331		http://www.tropicos.org/Specimen/103201777		CC_BY_4_0				Missouri Botanical Garden	PhysicalObject		http://biocol.org/urn:lsid:biocol.org:col:15859		BRLU	Tropicos	Tropicos	MOBOT	PRESERVED_SPECIMEN				urn:catalog:MO:Tropicos:103201777	103201777	Transects 1249a	Transects GuinÃ©e;Moussa DiabatÃ©;Mohamed DiabatÃ©;Oumar TraorÃ©;Lansana KonatÃ©;Mamady SidibÃ©		4											PRESENT
4062220343		http://www.tropicos.org/Specimen/103179920		CC_BY_4_0				Missouri Botanical Garden	PhysicalObject		http://biocol.org/urn:lsid:biocol.org:col:15859		PRP	Tropicos	Tropicos	MOBOT	PRESERVED_SPECIMEN				urn:catalog:MO:Tropicos:103179920	103179920	Dias 155	Davide Dias;Dionisio Fernandes		9											PRESENT
4062218509		http://www.tropicos.org/Specimen/103164344		CC_BY_4_0				Missouri Botanical Garden	PhysicalObject		http://biocol.org/urn:lsid:biocol.org:col:15859		TAN	Tropicos	Tropicos	MOBOT	PRESERVED_SPECIMEN				urn:catalog:MO:Tropicos:103164344	103164344	Ralainaorina 80	T. N. Ralainaorina;T.V. Rivoharison		5											PRESENT
4062218062		http://www.tropicos.org/Specimen/101818962		CC_BY_4_0				Missouri Botanical Garden	PhysicalObject		http://biocol.org/urn:lsid:biocol.org:col:15859		TAN	Tropicos	Tropicos	MOBOT	PRESERVED_SPECIMEN				urn:catalog:MO:Tropicos:101818962	101818962	Kotozafy 976	Alphonse Kotozafy		5											PRESENT
4062186002		http://www.tropicos.org/Specimen/102206829		CC_BY_4_0				Missouri Botanical Garden	PhysicalObject		http://biocol.org/urn:lsid:biocol.org:col:15859		CNARP	Tropicos	Tropicos	MOBOT	PRESERVED_SPECIMEN				urn:catalog:MO:Tropicos:102206829	102206829	Hong-Wa 223	Cynthia Hong-Wa		5											PRESENT
4062153281		http://www.tropicos.org/Specimen/102264072		CC_BY_4_0				Missouri Botanical Garden	PhysicalObject		http://biocol.org/urn:lsid:biocol.org:col:15859		TEF	Tropicos	Tropicos	MOBOT	PRESERVED_SPECIMEN				urn:catalog:MO:Tropicos:102264072	102264072	Callmander 340	Martin W. Callmander		6											PRESENT
4062116390		http://www.tropicos.org/Specimen/103239075		CC_BY_4_0				Missouri Botanical Garden	PhysicalObject		http://biocol.org/urn:lsid:biocol.org:col:15859		TAN	Tropicos	Tropicos	MOBOT	PRESERVED_SPECIMEN				urn:catalog:MO:Tropicos:103239075	103239075	Rivoharison 359	T.V. Rivoharison;Hasina N. Rakouth;Fortunat Rakotoarivony;Nivo Rakotonirina;S. Andriamiadana;Roger Lala Andriamiarisoa		3											PRESENT
4062114301		http://www.tropicos.org/Specimen/103232773		CC_BY_4_0				Missouri Botanical Garden	PhysicalObject		http://biocol.org/urn:lsid:biocol.org:col:15859		LBV	Tropicos	Tropicos	MOBOT	PRESERVED_SPECIMEN				urn:catalog:MO:Tropicos:103232773	103232773	Ikabanga 1893	Davy Ikabanga;Raoul Niangadouma;Christ Bikoukou;Jacques BiÃ© Mba;Roland Mitola;Jan Klein		3											PRESENT
4062110516		http://www.tropicos.org/Specimen/103184229		CC_BY_4_0				Missouri Botanical Garden	PhysicalObject		http://biocol.org/urn:lsid:biocol.org:col:15859		STPH	Tropicos	Tropicos	MOBOT	PRESERVED_SPECIMEN				urn:catalog:MO:Tropicos:103184229	103184229	Eduardo 50	Lewis Eduardo		4											PRESENT
4062110318		http://www.tropicos.org/Specimen/103180874		CC_BY_4_0				Missouri Botanical Garden	PhysicalObject		http://biocol.org/urn:lsid:biocol.org:col:15859		HNG	Tropicos	Tropicos	MOBOT	PRESERVED_SPECIMEN				urn:catalog:MO:Tropicos:103180874	103180874	DiabatÃ© 4859	Moussa DiabatÃ©;Mohamed DiabatÃ©;Lansana KonatÃ©		7											PRESENT
4062107636		http://www.tropicos.org/Specimen/101977093		CC_BY_4_0				Missouri Botanical Garden	PhysicalObject		http://biocol.org/urn:lsid:biocol.org:col:15859		TEF	Tropicos	Tropicos	MOBOT	PRESERVED_SPECIMEN				urn:catalog:MO:Tropicos:101977093	101977093	Andriamihajarivo 33	Tefy Andriamihajarivo		6											PRESENT
4062106591		http://www.tropicos.org/Specimen/101956123		CC_BY_4_0				Missouri Botanical Garden	PhysicalObject		http://biocol.org/urn:lsid:biocol.org:col:15859		LBV	Tropicos	Tropicos	MOBOT	PRESERVED_SPECIMEN				urn:catalog:MO:Tropicos:101956123	101956123	Niangadouma 141	Raoul Niangadouma;Gretchen Walters		3											PRESENT
4062101445		http://www.tropicos.org/Specimen/103213039		CC_BY_4_0				Missouri Botanical Garden	PhysicalObject		http://biocol.org/urn:lsid:biocol.org:col:15859		WAG	Tropicos	Tropicos	MOBOT	PRESERVED_SPECIMEN				urn:catalog:MO:Tropicos:103213039	103213039	KoÃ¯vogui 576	Kolou KoÃ¯vogui;Moussa DiabatÃ©;Oumar TraorÃ©;Mohamed DiabatÃ©;Lansana KonatÃ©		6											PRESENT
4062097288		http://www.tropicos.org/Specimen/103232242		CC_BY_4_0				Missouri Botanical Garden	PhysicalObject		http://biocol.org/urn:lsid:biocol.org:col:15859		LBV	Tropicos	Tropicos	MOBOT	PRESERVED_SPECIMEN				urn:catalog:MO:Tropicos:103232242	103232242	Ikabanga 1730	Davy Ikabanga;Raoul Niangadouma;Christ Bikoukou;Jacques BiÃ© Mba;Roland Mitola;Jan Klein		3											PRESENT
4062094356		http://www.tropicos.org/Specimen/101940798		CC_BY_4_0				Missouri Botanical Garden	PhysicalObject		http://biocol.org/urn:lsid:biocol.org:col:15859		TEF	Tropicos	Tropicos	MOBOT	PRESERVED_SPECIMEN				urn:catalog:MO:Tropicos:101940798	101940798	Andrianjafy 205	N.M. Andrianjafy;et al.		6											PRESENT
4062089420		http://www.tropicos.org/Specimen/103190284		CC_BY_4_0				Missouri Botanical Garden	PhysicalObject		http://biocol.org/urn:lsid:biocol.org:col:15859		LBV	Tropicos	Tropicos	MOBOT	PRESERVED_SPECIMEN				urn:catalog:MO:Tropicos:103190284	103190284	Paradis 736	Anne-HÃ©lÃ¨ne Paradis;Eric Akouangou;Jean de Dieu Kaparidi;Christ Dibouba Kombil;Bruno Ghelani		3											PRESENT
4062085507		http://www.tropicos.org/Specimen/103138046		CC_BY_4_0				Missouri Botanical Garden	PhysicalObject		http://biocol.org/urn:lsid:biocol.org:col:15859		BRLU	Tropicos	Tropicos	MOBOT	PRESERVED_SPECIMEN				urn:catalog:MO:Tropicos:103138046	103138046	Ikabanga 1131	Davy Ikabanga;Diosdado Nguema;Antonio Alberto;Dilson Madre Deus;Pascoal Sousa;Angela Lima		5											PRESENT
4062075148		http://www.tropicos.org/Specimen/103182849		CC_BY_4_0				Missouri Botanical Garden	PhysicalObject		http://biocol.org/urn:lsid:biocol.org:col:15859		PRP	Tropicos	Tropicos	MOBOT	PRESERVED_SPECIMEN				urn:catalog:MO:Tropicos:103182849	103182849	Transects 1074	Transects Principe;Davide Dias;Osvaldo Lima;Jeremias Prazeres;RocilÃ£o do Carmo		4											PRESENT
4062075061		http://www.tropicos.org/Specimen/103180869		CC_BY_4_0				Missouri Botanical Garden	PhysicalObject		http://biocol.org/urn:lsid:biocol.org:col:15859		P	Tropicos	Tropicos	MOBOT	PRESERVED_SPECIMEN				urn:catalog:MO:Tropicos:103180869	103180869	DiabatÃ© 4859	Moussa DiabatÃ©;Mohamed DiabatÃ©;Lansana KonatÃ©		7											PRESENT
4062074437		http://www.tropicos.org/Specimen/103167983		CC_BY_4_0				Missouri Botanical Garden	PhysicalObject		http://biocol.org/urn:lsid:biocol.org:col:15859		STPH	Tropicos	Tropicos	MOBOT	PRESERVED_SPECIMEN				urn:catalog:MO:Tropicos:103167983	103167983	Transects 187	Transects Sao TomÃ©;Dilson Madre Deus;Gilles Dauby;Davy Ikabanga;J. Engel;EstevÃ£o Soares;Antonio Alberto		2											PRESENT
4062069201		http://www.tropicos.org/Specimen/103184903		CC_BY_4_0				Missouri Botanical Garden	PhysicalObject		http://biocol.org/urn:lsid:biocol.org:col:15859		COI	Tropicos	Tropicos	MOBOT	PRESERVED_SPECIMEN				urn:catalog:MO:Tropicos:103184903	103184903	Lima 29	Angela Lima;AntÃ³nio Camuenha;Dilson Madre Deus;EstevÃ£o Soares;Lewis Eduardo;Pascoal Sousa		5											PRESENT
4062069183		http://www.tropicos.org/Specimen/103184392		CC_BY_4_0				Missouri Botanical Garden	PhysicalObject		http://biocol.org/urn:lsid:biocol.org:col:15859		COI	Tropicos	Tropicos	MOBOT	PRESERVED_SPECIMEN				urn:catalog:MO:Tropicos:103184392	103184392	Eduardo 106b	Lewis Eduardo;Maria do CÃ©u;Angela Lima;Pascoal Sousa;Dilson Madre Deus;AntÃ³nio Camuenha;EstevÃ£o Soares		5											PRESENT
4062068919		http://www.tropicos.org/Specimen/103179057		CC_BY_4_0				Missouri Botanical Garden	PhysicalObject		http://biocol.org/urn:lsid:biocol.org:col:15859		LBV	Tropicos	Tropicos	MOBOT	PRESERVED_SPECIMEN				urn:catalog:MO:Tropicos:103179057	103179057	Transect 32	Transect, MBG-USTM;Davy Ikabanga;Christ Bikoukou;Roland Mitola;Roger Boussougou;Boulekagui, Maxime A.		2											PRESENT
4062057921		http://www.tropicos.org/Specimen/101818140		CC_BY_4_0				Missouri Botanical Garden	PhysicalObject		http://biocol.org/urn:lsid:biocol.org:col:15859		TAN	Tropicos	Tropicos	MOBOT	PRESERVED_SPECIMEN				urn:catalog:MO:Tropicos:101818140	101818140	Andrianantoanina 121	Olivier Andrianantoanina;et al.		10											PRESENT
4062056544		http://www.tropicos.org/Specimen/103147564		CC_BY_4_0				Missouri Botanical Garden	PhysicalObject		http://biocol.org/urn:lsid:biocol.org:col:15859		P	Tropicos	Tropicos	MOBOT	PRESERVED_SPECIMEN				urn:catalog:MO:Tropicos:103147564	103147564	KoÃ¯vogui 156	Kolou KoÃ¯vogui;Moussa DiabatÃ©;Philomena Yarwoah;Lansana KonatÃ©		6											PRESENT
4062050090		http://www.tropicos.org/Specimen/103140197		CC_BY_4_0				Missouri Botanical Garden	PhysicalObject		http://biocol.org/urn:lsid:biocol.org:col:15859		BRLU	Tropicos	Tropicos	MOBOT	PRESERVED_SPECIMEN				urn:catalog:MO:Tropicos:103140197	103140197	Yarwoah 170	Philomena Yarwoah;Lansana KonatÃ©		4											PRESENT
4062044073		http://www.tropicos.org/Specimen/103138049		CC_BY_4_0				Missouri Botanical Garden	PhysicalObject		http://biocol.org/urn:lsid:biocol.org:col:15859		STPH	Tropicos	Tropicos	MOBOT	PRESERVED_SPECIMEN				urn:catalog:MO:Tropicos:103138049	103138049	Ikabanga 1131	Davy Ikabanga;Diosdado Nguema;Antonio Alberto;Dilson Madre Deus;Pascoal Sousa;Angela Lima		5											PRESENT
4062037374		http://www.tropicos.org/Specimen/102493674		CC_BY_4_0				Missouri Botanical Garden	PhysicalObject		http://biocol.org/urn:lsid:biocol.org:col:15859		P	Tropicos	Tropicos	MOBOT	PRESERVED_SPECIMEN				urn:catalog:MO:Tropicos:102493674	102493674	Bernard 1323	Roger Bernard;et al.		6											PRESENT
4062027058		http://www.tropicos.org/Specimen/1500868		CC_BY_4_0				Missouri Botanical Garden	PhysicalObject		http://biocol.org/urn:lsid:biocol.org:col:15859			Tropicos	Tropicos	MOBOT	PRESERVED_SPECIMEN				urn:catalog:MO:Tropicos:1500868	1500868	Gentry 33565	Alwyn H. Gentry		1											PRESENT
4062022035		http://www.tropicos.org/Specimen/103021182		CC_BY_4_0				Missouri Botanical Garden	PhysicalObject		http://biocol.org/urn:lsid:biocol.org:col:15859		P	Tropicos	Tropicos	MOBOT	PRESERVED_SPECIMEN				urn:catalog:MO:Tropicos:103021182	103021182	Rakotonirina 156	Giovanni A. Rakotonirina;P. Antilahimena;Anthony R. Syde		5											PRESENT
4061985152		http://www.tropicos.org/Specimen/1202526		CC_BY_4_0				Missouri Botanical Garden	PhysicalObject		http://biocol.org/urn:lsid:biocol.org:col:15859			Tropicos	Tropicos	MOBOT	PRESERVED_SPECIMEN				urn:catalog:MO:Tropicos:1202526	1202526	Razafindrabe 308	J.-B. Razafindrabe		5											PRESENT
4061980329		http://www.tropicos.org/Specimen/102927913		CC_BY_4_0				Missouri Botanical Garden	PhysicalObject		http://biocol.org/urn:lsid:biocol.org:col:15859		LBV	Tropicos	Tropicos	MOBOT	PRESERVED_SPECIMEN				urn:catalog:MO:Tropicos:102927913	102927913	Nguema 2958	Diosdado Nguema;HervÃ© Memiague;Gauthier Moussavou;Landry Tchignoumba;Wilfried Mbading Mbading		3											PRESENT
4061980203		http://www.tropicos.org/Specimen/103015531		CC_BY_4_0				Missouri Botanical Garden	PhysicalObject		http://biocol.org/urn:lsid:biocol.org:col:15859		P	Tropicos	Tropicos	MOBOT	PRESERVED_SPECIMEN				urn:catalog:MO:Tropicos:103015531	103015531	Trigui 377	S.M. Trigui;M.H. Razanajatovo;S.D. Ramandimbimanana		6											PRESENT
4061975919		http://www.tropicos.org/Specimen/103184227		CC_BY_4_0				Missouri Botanical Garden	PhysicalObject		http://biocol.org/urn:lsid:biocol.org:col:15859		COI	Tropicos	Tropicos	MOBOT	PRESERVED_SPECIMEN				urn:catalog:MO:Tropicos:103184227	103184227	Eduardo 50	Lewis Eduardo		4											PRESENT
4061975719		http://www.tropicos.org/Specimen/103180872		CC_BY_4_0				Missouri Botanical Garden	PhysicalObject		http://biocol.org/urn:lsid:biocol.org:col:15859		WAG	Tropicos	Tropicos	MOBOT	PRESERVED_SPECIMEN				urn:catalog:MO:Tropicos:103180872	103180872	DiabatÃ© 4859	Moussa DiabatÃ©;Mohamed DiabatÃ©;Lansana KonatÃ©		7											PRESENT
4061974727		http://www.tropicos.org/Specimen/103011486		CC_BY_4_0				Missouri Botanical Garden	PhysicalObject		http://biocol.org/urn:lsid:biocol.org:col:15859		TEF	Tropicos	Tropicos	MOBOT	PRESERVED_SPECIMEN				urn:catalog:MO:Tropicos:103011486	103011486	Ramandimbimanana 51	S.D. Ramandimbimanana		4											PRESENT
4061972794		http://www.tropicos.org/Specimen/103014328		CC_BY_4_0				Missouri Botanical Garden	PhysicalObject		http://biocol.org/urn:lsid:biocol.org:col:15859		P	Tropicos	Tropicos	MOBOT	PRESERVED_SPECIMEN				urn:catalog:MO:Tropicos:103014328	103014328	Tahinarivony 619	A. J. Tahinarivony;N.S. Rasoanaivo		5											PRESENT
4061957522		http://www.tropicos.org/Specimen/102982912		CC_BY_4_0				Missouri Botanical Garden	PhysicalObject		http://biocol.org/urn:lsid:biocol.org:col:15859		TAN	Tropicos	Tropicos	MOBOT	PRESERVED_SPECIMEN				urn:catalog:MO:Tropicos:102982912	102982912	Birkinshaw 2208	Chris Birkinshaw		1											PRESENT
4061945817		http://www.tropicos.org/Specimen/103137829		CC_BY_4_0				Missouri Botanical Garden	PhysicalObject		http://biocol.org/urn:lsid:biocol.org:col:15859		COI	Tropicos	Tropicos	MOBOT	PRESERVED_SPECIMEN				urn:catalog:MO:Tropicos:103137829	103137829	Ikabanga 1066	Davy Ikabanga;Diosdado Nguema;Maria do CÃ©u;Antonio Alberto;Lewis Eduardo;Dilson Madre Deus;Pascoal Sousa;Angela Lima		4											PRESENT
4061944715		http://www.tropicos.org/Specimen/102959176		CC_BY_4_0				Missouri Botanical Garden	PhysicalObject		http://biocol.org/urn:lsid:biocol.org:col:15859		LBV	Tropicos	Tropicos	MOBOT	PRESERVED_SPECIMEN				urn:catalog:MO:Tropicos:102959176	102959176	Nguema 2417	Diosdado Nguema;HervÃ© Memiague;P. Bissiemou;Etienne Mounoumoulossi		3											PRESENT
4061939708		http://www.tropicos.org/Specimen/102928351		CC_BY_4_0				Missouri Botanical Garden	PhysicalObject		http://biocol.org/urn:lsid:biocol.org:col:15859		P	Tropicos	Tropicos	MOBOT	PRESERVED_SPECIMEN				urn:catalog:MO:Tropicos:102928351	102928351	Ikabanga 516	Davy Ikabanga;AurÃ©lien Mokea		6											PRESENT
4061939158		http://www.tropicos.org/Specimen/102863783		CC_BY_4_0				Missouri Botanical Garden	PhysicalObject		http://biocol.org/urn:lsid:biocol.org:col:15859		LBV	Tropicos	Tropicos	MOBOT	PRESERVED_SPECIMEN				urn:catalog:MO:Tropicos:102863783	102863783	Ikabanga 19	Davy Ikabanga		4											PRESENT
4061931249		http://www.tropicos.org/Specimen/103121835		CC_BY_4_0				Missouri Botanical Garden	PhysicalObject		http://biocol.org/urn:lsid:biocol.org:col:15859		DSM	Tropicos	Tropicos	MOBOT	PRESERVED_SPECIMEN				urn:catalog:MO:Tropicos:103121835	103121835	Soah 725	Shabani Soah;L. Festo;M. Msafiri		2											PRESENT
4061927077		http://www.tropicos.org/Specimen/102938500		CC_BY_4_0				Missouri Botanical Garden	PhysicalObject		http://biocol.org/urn:lsid:biocol.org:col:15859		YA	Tropicos	Tropicos	MOBOT	PRESERVED_SPECIMEN				urn:catalog:MO:Tropicos:102938500	102938500	Droissart 1051	Vincent Droissart;GyslÃ¨ne Kamdem;Narcisse Kamdem;Pierre Ploton													PRESENT
4061911637		http://www.tropicos.org/Specimen/102867823		CC_BY_4_0				Missouri Botanical Garden	PhysicalObject		http://biocol.org/urn:lsid:biocol.org:col:15859		P	Tropicos	Tropicos	MOBOT	PRESERVED_SPECIMEN				urn:catalog:MO:Tropicos:102867823	102867823	Tahinarivony 233	A. J. Tahinarivony;Mintina Roberta Cathy Madiomanana;Morgane Ammann		6											PRESENT
4061910414		http://www.tropicos.org/Specimen/102888263		CC_BY_4_0				Missouri Botanical Garden	PhysicalObject		http://biocol.org/urn:lsid:biocol.org:col:15859		WAG	Tropicos	Tropicos	MOBOT	PRESERVED_SPECIMEN				urn:catalog:MO:Tropicos:102888263	102888263	Laizer 3610	Gabriel Simon Laizer;M. Rajabu		5											PRESENT
4061902394		http://www.tropicos.org/Specimen/103189922		CC_BY_4_0				Missouri Botanical Garden	PhysicalObject		http://biocol.org/urn:lsid:biocol.org:col:15859		LBV	Tropicos	Tropicos	MOBOT	PRESERVED_SPECIMEN				urn:catalog:MO:Tropicos:103189922	103189922	Paradis 510	Anne-HÃ©lÃ¨ne Paradis;Eric Akouangou;Jean de Dieu Kaparidi		2											PRESENT
4061900329		http://www.tropicos.org/Specimen/103213037		CC_BY_4_0				Missouri Botanical Garden	PhysicalObject		http://biocol.org/urn:lsid:biocol.org:col:15859		SERG	Tropicos	Tropicos	MOBOT	PRESERVED_SPECIMEN				urn:catalog:MO:Tropicos:103213037	103213037	KoÃ¯vogui 576	Kolou KoÃ¯vogui;Moussa DiabatÃ©;Oumar TraorÃ©;Mohamed DiabatÃ©;Lansana KonatÃ©		6											PRESENT
4061890081		http://www.tropicos.org/Specimen/103180870		CC_BY_4_0				Missouri Botanical Garden	PhysicalObject		http://biocol.org/urn:lsid:biocol.org:col:15859		SERG	Tropicos	Tropicos	MOBOT	PRESERVED_SPECIMEN				urn:catalog:MO:Tropicos:103180870	103180870	DiabatÃ© 4859	Moussa DiabatÃ©;Mohamed DiabatÃ©;Lansana KonatÃ©		7											PRESENT
4061890028		http://www.tropicos.org/Specimen/103179913		CC_BY_4_0				Missouri Botanical Garden	PhysicalObject		http://biocol.org/urn:lsid:biocol.org:col:15859		STPH	Tropicos	Tropicos	MOBOT	PRESERVED_SPECIMEN				urn:catalog:MO:Tropicos:103179913	103179913	Dias 153	Davide Dias;Osvaldo Lima;Jeremias Prazeres;JosÃ© Tavares;Dionisio Fernandes;Laura Benitez		6											PRESENT
4061890025		http://www.tropicos.org/Specimen/103179858		CC_BY_4_0				Missouri Botanical Garden	PhysicalObject		http://biocol.org/urn:lsid:biocol.org:col:15859		STPH	Tropicos	Tropicos	MOBOT	PRESERVED_SPECIMEN				urn:catalog:MO:Tropicos:103179858	103179858	Dias 131	Davide Dias		3											PRESENT
4061889439		http://www.tropicos.org/Specimen/103167725		CC_BY_4_0				Missouri Botanical Garden	PhysicalObject		http://biocol.org/urn:lsid:biocol.org:col:15859		STPH	Tropicos	Tropicos	MOBOT	PRESERVED_SPECIMEN				urn:catalog:MO:Tropicos:103167725	103167725	Transects 796	Transects Sao TomÃ©;Dilson Madre Deus;Angela Lima;Diosdado Nguema;Pascoal Sousa;EstevÃ£o Soares		2											PRESENT
4061887865		http://www.tropicos.org/Specimen/103179912		CC_BY_4_0				Missouri Botanical Garden	PhysicalObject		http://biocol.org/urn:lsid:biocol.org:col:15859		COI	Tropicos	Tropicos	MOBOT	PRESERVED_SPECIMEN				urn:catalog:MO:Tropicos:103179912	103179912	Dias 153	Davide Dias;Osvaldo Lima;Jeremias Prazeres;JosÃ© Tavares;Dionisio Fernandes;Laura Benitez		6											PRESENT
4061887861		http://www.tropicos.org/Specimen/103179857		CC_BY_4_0				Missouri Botanical Garden	PhysicalObject		http://biocol.org/urn:lsid:biocol.org:col:15859		COI	Tropicos	Tropicos	MOBOT	PRESERVED_SPECIMEN				urn:catalog:MO:Tropicos:103179857	103179857	Dias 131	Davide Dias		3											PRESENT
4061887737		http://www.tropicos.org/Specimen/103177228		CC_BY_4_0				Missouri Botanical Garden	PhysicalObject		http://biocol.org/urn:lsid:biocol.org:col:15859		LBV	Tropicos	Tropicos	MOBOT	PRESERVED_SPECIMEN				urn:catalog:MO:Tropicos:103177228	103177228	Klein 252	Jan Klein;Diosdado Nguema;Eric Akouangou;Jean de Dieu Kaparidi;Igor Nguimbit		2											PRESENT
4061878656		http://www.tropicos.org/Specimen/102837906		CC_BY_4_0				Missouri Botanical Garden	PhysicalObject		http://biocol.org/urn:lsid:biocol.org:col:15859		TAN	Tropicos	Tropicos	MOBOT	PRESERVED_SPECIMEN				urn:catalog:MO:Tropicos:102837906	102837906	Randrianaivo 2233	Richard Randrianaivo;Tahiry Rivo Harison Victoria;Armand Rakotomalala;Herizo Njakatiana Andriamahefa;Claudia Rasolofomanana Lovasoa Maminiaina Lucile;Tantely Rasoambolanoro Maminiaina;Ihavontsoa Rasolonirina Tsilavina Elinah;Armand Randriantsarafara;Andry Rasamuel;Ravakiniaina Rasolofomanana Lovasoa		4											PRESENT
4061872087		http://www.tropicos.org/Specimen/103182847		CC_BY_4_0				Missouri Botanical Garden	PhysicalObject		http://biocol.org/urn:lsid:biocol.org:col:15859		COI	Tropicos	Tropicos	MOBOT	PRESERVED_SPECIMEN				urn:catalog:MO:Tropicos:103182847	103182847	Transects 1074	Transects Principe;Davide Dias;Osvaldo Lima;Jeremias Prazeres;RocilÃ£o do Carmo		4											PRESENT
4061857494		http://www.tropicos.org/Specimen/103147565		CC_BY_4_0				Missouri Botanical Garden	PhysicalObject		http://biocol.org/urn:lsid:biocol.org:col:15859		SERG	Tropicos	Tropicos	MOBOT	PRESERVED_SPECIMEN				urn:catalog:MO:Tropicos:103147565	103147565	KoÃ¯vogui 156	Kolou KoÃ¯vogui;Moussa DiabatÃ©;Philomena Yarwoah;Lansana KonatÃ©		6											PRESENT
4061854604		http://www.tropicos.org/Specimen/102743699		CC_BY_4_0				Missouri Botanical Garden	PhysicalObject		http://biocol.org/urn:lsid:biocol.org:col:15859		TAN	Tropicos	Tropicos	MOBOT	PRESERVED_SPECIMEN				urn:catalog:MO:Tropicos:102743699	102743699	Antilahimena 7513	P. Antilahimena;FÃ©lix Edmond		3											PRESENT
4061834839		http://www.tropicos.org/Specimen/101704247		CC_BY_4_0				Missouri Botanical Garden	PhysicalObject		http://biocol.org/urn:lsid:biocol.org:col:15859		TAN	Tropicos	Tropicos	MOBOT	PRESERVED_SPECIMEN				urn:catalog:MO:Tropicos:101704247	101704247	Rakotovao 316	Charles Rakotovao		4											PRESENT
4061832612		http://www.tropicos.org/Specimen/101127714		CC_BY_4_0				Missouri Botanical Garden	PhysicalObject		http://biocol.org/urn:lsid:biocol.org:col:15859			Tropicos	Tropicos	MOBOT	PRESERVED_SPECIMEN				urn:catalog:MO:Tropicos:101127714	101127714	Hassold 488	Sonja Hassold		1											PRESENT
4061830669		http://www.tropicos.org/Specimen/103104852		CC_BY_4_0				Missouri Botanical Garden	PhysicalObject		http://biocol.org/urn:lsid:biocol.org:col:15859		STPH	Tropicos	Tropicos	MOBOT	PRESERVED_SPECIMEN				urn:catalog:MO:Tropicos:103104852	103104852	Transects 109bis	Transects Principe;Tariq StÃ©vart;Davide Dias;Laura Benitez;Faustino de Oliveira;Balou Rocha													PRESENT
4061829029		http://www.tropicos.org/Specimen/102965168		CC_BY_4_0				Missouri Botanical Garden	PhysicalObject		http://biocol.org/urn:lsid:biocol.org:col:15859		TAN	Tropicos	Tropicos	MOBOT	PRESERVED_SPECIMEN				urn:catalog:MO:Tropicos:102965168	102965168	Razanatsoa 646	J. Razanatsoa;Roger Bernard;Brock Mashburn		3											PRESENT
4061825218		http://www.tropicos.org/Specimen/102704061		CC_BY_4_0				Missouri Botanical Garden	PhysicalObject		http://biocol.org/urn:lsid:biocol.org:col:15859		TAN	Tropicos	Tropicos	MOBOT	PRESERVED_SPECIMEN				urn:catalog:MO:Tropicos:102704061	102704061	Randrianasolo 1325	Armand Randrianasolo;L. Rasoaviety;Fortunat Rakotoarivony;Nivo H. Rakotoarivelo;Rainer W. Bussmann		5											PRESENT
4061824049		http://www.tropicos.org/Specimen/3626687		CC_BY_4_0				Missouri Botanical Garden	PhysicalObject		http://biocol.org/urn:lsid:biocol.org:col:15859			Tropicos	Tropicos	MOBOT	PRESERVED_SPECIMEN				urn:catalog:MO:Tropicos:3626687	3626687	Mamadou 72	E.M. Mamadou		3											PRESENT
4061824045		http://www.tropicos.org/Specimen/3626632		CC_BY_4_0				Missouri Botanical Garden	PhysicalObject		http://biocol.org/urn:lsid:biocol.org:col:15859			Tropicos	Tropicos	MOBOT	PRESERVED_SPECIMEN				urn:catalog:MO:Tropicos:3626632	3626632	Mamadou 279	E.M. Mamadou		4											PRESENT
4061824042		http://www.tropicos.org/Specimen/3626588		CC_BY_4_0				Missouri Botanical Garden	PhysicalObject		http://biocol.org/urn:lsid:biocol.org:col:15859			Tropicos	Tropicos	MOBOT	PRESERVED_SPECIMEN				urn:catalog:MO:Tropicos:3626588	3626588	Mamadou 185	E.M. Mamadou		4											PRESENT
4061809542		http://www.tropicos.org/Specimen/100297504		CC_BY_4_0				Missouri Botanical Garden	PhysicalObject		http://biocol.org/urn:lsid:biocol.org:col:15859			Tropicos	Tropicos	MOBOT	PRESERVED_SPECIMEN				urn:catalog:MO:Tropicos:100297504	100297504	Nikolov 1671	Lachezar Nikolov;Hafany Tombondray;Adolphe Lehavana		3											PRESENT
4061808370		http://www.tropicos.org/Specimen/3625975		CC_BY_4_0				Missouri Botanical Garden	PhysicalObject		http://biocol.org/urn:lsid:biocol.org:col:15859			Tropicos	Tropicos	MOBOT	PRESERVED_SPECIMEN				urn:catalog:MO:Tropicos:3625975	3625975	Mouandza Mbembo 385	Jean-Claude Mouandza Mbembo		5											PRESENT
4061797641		http://www.tropicos.org/Specimen/102636713		CC_BY_4_0				Missouri Botanical Garden	PhysicalObject		http://biocol.org/urn:lsid:biocol.org:col:15859		BRLU	Tropicos	Tropicos	MOBOT	PRESERVED_SPECIMEN				urn:catalog:MO:Tropicos:102636713	102636713	Randrianaivo 1624	Richard Randrianaivo;Faustino de Oliveira;Antonio Alberto;Adalio Esperito Sainto;Pedro Leton;EstevÃ£o Soares;Agusto Pereira		5											PRESENT
4061783879		http://www.tropicos.org/Specimen/103014329		CC_BY_4_0				Missouri Botanical Garden	PhysicalObject		http://biocol.org/urn:lsid:biocol.org:col:15859		TEF	Tropicos	Tropicos	MOBOT	PRESERVED_SPECIMEN				urn:catalog:MO:Tropicos:103014329	103014329	Tahinarivony 619	A. J. Tahinarivony;N.S. Rasoanaivo		5											PRESENT
4061772129		http://www.tropicos.org/Specimen/103015532		CC_BY_4_0				Missouri Botanical Garden	PhysicalObject		http://biocol.org/urn:lsid:biocol.org:col:15859		TEF	Tropicos	Tropicos	MOBOT	PRESERVED_SPECIMEN				urn:catalog:MO:Tropicos:103015532	103015532	Trigui 377	S.M. Trigui;M.H. Razanajatovo;S.D. Ramandimbimanana		6											PRESENT
4061769654		http://www.tropicos.org/Specimen/102984184		CC_BY_4_0				Missouri Botanical Garden	PhysicalObject		http://biocol.org/urn:lsid:biocol.org:col:15859		TAN	Tropicos	Tropicos	MOBOT	PRESERVED_SPECIMEN				urn:catalog:MO:Tropicos:102984184	102984184	Letsara 1337	R. Letsara		5											PRESENT
4061769613		http://www.tropicos.org/Specimen/102982913		CC_BY_4_0				Missouri Botanical Garden	PhysicalObject		http://biocol.org/urn:lsid:biocol.org:col:15859		BM	Tropicos	Tropicos	MOBOT	PRESERVED_SPECIMEN				urn:catalog:MO:Tropicos:102982913	102982913	Birkinshaw 2208	Chris Birkinshaw		1											PRESENT
4061753043		http://www.tropicos.org/Specimen/102959424		CC_BY_4_0				Missouri Botanical Garden	PhysicalObject		http://biocol.org/urn:lsid:biocol.org:col:15859		LBV	Tropicos	Tropicos	MOBOT	PRESERVED_SPECIMEN				urn:catalog:MO:Tropicos:102959424	102959424	Nguema 2551	Diosdado Nguema;HervÃ© Memiague;P. Bissiemou;Etienne Mounoumoulossi		3											PRESENT
4061745103		http://www.tropicos.org/Specimen/1944867		CC_BY_4_0				Missouri Botanical Garden	PhysicalObject		http://biocol.org/urn:lsid:biocol.org:col:15859			Tropicos	Tropicos	MOBOT	PRESERVED_SPECIMEN				urn:catalog:MO:Tropicos:1944867	1944867	Kibure 1021	O.A. Kibure;John A. Mlangwa;H. Bofu;P. Betela		3											PRESENT
4061744598		http://www.tropicos.org/Specimen/1874544		CC_BY_4_0				Missouri Botanical Garden	PhysicalObject		http://biocol.org/urn:lsid:biocol.org:col:15859			Tropicos	Tropicos	MOBOT	PRESERVED_SPECIMEN				urn:catalog:MO:Tropicos:1874544	1874544	Eboroke 1015	Sylvain Eboroke													PRESENT
4061732864		http://www.tropicos.org/Specimen/1745412		CC_BY_4_0				Missouri Botanical Garden	PhysicalObject		http://biocol.org/urn:lsid:biocol.org:col:15859			Tropicos	Tropicos	MOBOT	PRESERVED_SPECIMEN				urn:catalog:MO:Tropicos:1745412	1745412	Aridy 345	J. Aridy		4											PRESENT
4061731898		http://www.tropicos.org/Specimen/1818395		CC_BY_4_0				Missouri Botanical Garden	PhysicalObject		http://biocol.org/urn:lsid:biocol.org:col:15859			Tropicos	Tropicos	MOBOT	PRESERVED_SPECIMEN				urn:catalog:MO:Tropicos:1818395	1818395	Sainge 412	M. Sainge		1											PRESENT
4061726365		http://www.tropicos.org/Specimen/102888264		CC_BY_4_0				Missouri Botanical Garden	PhysicalObject		http://biocol.org/urn:lsid:biocol.org:col:15859		MA	Tropicos	Tropicos	MOBOT	PRESERVED_SPECIMEN				urn:catalog:MO:Tropicos:102888264	102888264	Laizer 3610	Gabriel Simon Laizer;M. Rajabu		5											PRESENT
4061723711		http://www.tropicos.org/Specimen/102928352		CC_BY_4_0				Missouri Botanical Garden	PhysicalObject		http://biocol.org/urn:lsid:biocol.org:col:15859		BRLU	Tropicos	Tropicos	MOBOT	PRESERVED_SPECIMEN				urn:catalog:MO:Tropicos:102928352	102928352	Ikabanga 516	Davy Ikabanga;AurÃ©lien Mokea		6											PRESENT
4061722617		http://www.tropicos.org/Specimen/102889464		CC_BY_4_0				Missouri Botanical Garden	PhysicalObject		http://biocol.org/urn:lsid:biocol.org:col:15859		P	Tropicos	Tropicos	MOBOT	PRESERVED_SPECIMEN				urn:catalog:MO:Tropicos:102889464	102889464	Martial 161	Martial;Casmir Z. Rakotonirina;Georges Be		4											PRESENT
4061718552		http://www.tropicos.org/Specimen/1695178		CC_BY_4_0				Missouri Botanical Garden	PhysicalObject		http://biocol.org/urn:lsid:biocol.org:col:15859			Tropicos	Tropicos	MOBOT	PRESERVED_SPECIMEN				urn:catalog:MO:Tropicos:1695178	1695178	Bradley 1084	Adam F. Bradley;Gretchen Walters;Ginot N. Essouma;Alphonse Mbaniboua;et al.		5											PRESENT
4061716621		http://www.tropicos.org/Specimen/1568103		CC_BY_4_0				Missouri Botanical Garden	PhysicalObject		http://biocol.org/urn:lsid:biocol.org:col:15859			Tropicos	Tropicos	MOBOT	PRESERVED_SPECIMEN				urn:catalog:MO:Tropicos:1568103	1568103	Mwangoka 1566	Moses A. Mwangoka;P. Mponda;et al.		5											PRESENT
4061703677		http://www.tropicos.org/Specimen/1799082		CC_BY_4_0				Missouri Botanical Garden	PhysicalObject		http://biocol.org/urn:lsid:biocol.org:col:15859			Tropicos	Tropicos	MOBOT	PRESERVED_SPECIMEN				urn:catalog:MO:Tropicos:1799082	1799082	Gentry 11873	Alwyn H. Gentry													PRESENT
4061693683		http://www.tropicos.org/Specimen/102867824		CC_BY_4_0				Missouri Botanical Garden	PhysicalObject		http://biocol.org/urn:lsid:biocol.org:col:15859		WAG	Tropicos	Tropicos	MOBOT	PRESERVED_SPECIMEN				urn:catalog:MO:Tropicos:102867824	102867824	Tahinarivony 233	A. J. Tahinarivony;Mintina Roberta Cathy Madiomanana;Morgane Ammann		6											PRESENT
4061691500		http://www.tropicos.org/Specimen/1434852		CC_BY_4_0				Missouri Botanical Garden	PhysicalObject		http://biocol.org/urn:lsid:biocol.org:col:15859			Tropicos	Tropicos	MOBOT	PRESERVED_SPECIMEN				urn:catalog:MO:Tropicos:1434852	1434852	Elia 66	John Elia;John A. Mlangwa		6											PRESENT
4061691497		http://www.tropicos.org/Specimen/1434665		CC_BY_4_0				Missouri Botanical Garden	PhysicalObject		http://biocol.org/urn:lsid:biocol.org:col:15859			Tropicos	Tropicos	MOBOT	PRESERVED_SPECIMEN				urn:catalog:MO:Tropicos:1434665	1434665	Mwangoka 451	Moses A. Mwangoka		6											PRESENT
4061681087		http://www.tropicos.org/Specimen/102493676		CC_BY_4_0				Missouri Botanical Garden	PhysicalObject		http://biocol.org/urn:lsid:biocol.org:col:15859		WAG	Tropicos	Tropicos	MOBOT	PRESERVED_SPECIMEN				urn:catalog:MO:Tropicos:102493676	102493676	Bernard 1323	Roger Bernard;et al.		6											PRESENT
4061678493		http://www.tropicos.org/Specimen/1348876		CC_BY_4_0				Missouri Botanical Garden	PhysicalObject		http://biocol.org/urn:lsid:biocol.org:col:15859			Tropicos	Tropicos	MOBOT	PRESERVED_SPECIMEN				urn:catalog:MO:Tropicos:1348876	1348876	Mwangoka 426	Moses A. Mwangoka		6											PRESENT
4061674904		http://www.tropicos.org/Specimen/3628346		CC_BY_4_0				Missouri Botanical Garden	PhysicalObject		http://biocol.org/urn:lsid:biocol.org:col:15859			Tropicos	Tropicos	MOBOT	PRESERVED_SPECIMEN				urn:catalog:MO:Tropicos:3628346	3628346	Boussengui-Nongo 41	J. Boussengui-Nongo		3											PRESENT
4061674764		http://www.tropicos.org/Specimen/3625255		CC_BY_4_0				Missouri Botanical Garden	PhysicalObject		http://biocol.org/urn:lsid:biocol.org:col:15859			Tropicos	Tropicos	MOBOT	PRESERVED_SPECIMEN				urn:catalog:MO:Tropicos:3625255	3625255	Boussengui-Nongo 59	J. Boussengui-Nongo		3											PRESENT
4061664749		http://www.tropicos.org/Specimen/1282848		CC_BY_4_0				Missouri Botanical Garden	PhysicalObject		http://biocol.org/urn:lsid:biocol.org:col:15859			Tropicos	Tropicos	MOBOT	PRESERVED_SPECIMEN				urn:catalog:MO:Tropicos:1282848	1282848	ATBP 710	ATBP		4											PRESENT
4061656063		http://www.tropicos.org/Specimen/1216158		CC_BY_4_0				Missouri Botanical Garden	PhysicalObject		http://biocol.org/urn:lsid:biocol.org:col:15859			Tropicos	Tropicos	MOBOT	PRESERVED_SPECIMEN				urn:catalog:MO:Tropicos:1216158	1216158	Kotozafy 735	Alphonse Kotozafy;Paul Rasabo;F. Ratalata		2											PRESENT
4061653338		http://www.tropicos.org/Specimen/1216163		CC_BY_4_0				Missouri Botanical Garden	PhysicalObject		http://biocol.org/urn:lsid:biocol.org:col:15859			Tropicos	Tropicos	MOBOT	PRESERVED_SPECIMEN				urn:catalog:MO:Tropicos:1216163	1216163	Kotozafy 740	Alphonse Kotozafy;Paul Rasabo;F. Ratalata		2											PRESENT
4061643148		http://www.tropicos.org/Specimen/1398764		CC_BY_4_0				Missouri Botanical Garden	PhysicalObject		http://biocol.org/urn:lsid:biocol.org:col:15859			Tropicos	Tropicos	MOBOT	PRESERVED_SPECIMEN				urn:catalog:MO:Tropicos:1398764	1398764	Gobbo 261	Grace Gobbo		6											PRESENT
4061642668		http://www.tropicos.org/Specimen/1348604		CC_BY_4_0				Missouri Botanical Garden	PhysicalObject		http://biocol.org/urn:lsid:biocol.org:col:15859			Tropicos	Tropicos	MOBOT	PRESERVED_SPECIMEN				urn:catalog:MO:Tropicos:1348604	1348604	Mwangoka 365	Moses A. Mwangoka		6											PRESENT
4061637724		http://www.tropicos.org/Specimen/3625709		CC_BY_4_0				Missouri Botanical Garden	PhysicalObject		http://biocol.org/urn:lsid:biocol.org:col:15859			Tropicos	Tropicos	MOBOT	PRESERVED_SPECIMEN				urn:catalog:MO:Tropicos:3625709	3625709	Mouandza Mbembo 612	Jean-Claude Mouandza Mbembo		7											PRESENT
4061633811		http://www.tropicos.org/Specimen/3626484		CC_BY_4_0				Missouri Botanical Garden	PhysicalObject		http://biocol.org/urn:lsid:biocol.org:col:15859			Tropicos	Tropicos	MOBOT	PRESERVED_SPECIMEN				urn:catalog:MO:Tropicos:3626484	3626484	Mamadou 4	E.M. Mamadou		3											PRESENT
4061629236		http://www.tropicos.org/Specimen/1310467		CC_BY_4_0				Missouri Botanical Garden	PhysicalObject		http://biocol.org/urn:lsid:biocol.org:col:15859			Tropicos	Tropicos	MOBOT	PRESERVED_SPECIMEN				urn:catalog:MO:Tropicos:1310467	1310467	Mwangoka 91	Moses A. Mwangoka;C.J. Kayombo		6											PRESENT
4061619566		http://www.tropicos.org/Specimen/921819		CC_BY_4_0				Missouri Botanical Garden	PhysicalObject		http://biocol.org/urn:lsid:biocol.org:col:15859			Tropicos	Tropicos	MOBOT	PRESERVED_SPECIMEN				urn:catalog:MO:Tropicos:921819	921819	Kotozafy 430	Alphonse Kotozafy		2											PRESENT
4061611681		http://www.tropicos.org/Specimen/921832		CC_BY_4_0				Missouri Botanical Garden	PhysicalObject		http://biocol.org/urn:lsid:biocol.org:col:15859			Tropicos	Tropicos	MOBOT	PRESERVED_SPECIMEN				urn:catalog:MO:Tropicos:921832	921832	Kotozafy 435	Alphonse Kotozafy		2											PRESENT
4061611680		http://www.tropicos.org/Specimen/921821		CC_BY_4_0				Missouri Botanical Garden	PhysicalObject		http://biocol.org/urn:lsid:biocol.org:col:15859			Tropicos	Tropicos	MOBOT	PRESERVED_SPECIMEN				urn:catalog:MO:Tropicos:921821	921821	Kotozafy 431	Alphonse Kotozafy		2											PRESENT
4061611679		http://www.tropicos.org/Specimen/921799		CC_BY_4_0				Missouri Botanical Garden	PhysicalObject		http://biocol.org/urn:lsid:biocol.org:col:15859			Tropicos	Tropicos	MOBOT	PRESERVED_SPECIMEN				urn:catalog:MO:Tropicos:921799	921799	Kotozafy 416	Alphonse Kotozafy		2											PRESENT
4061610545		http://www.tropicos.org/Specimen/209198		CC_BY_4_0				Missouri Botanical Garden	PhysicalObject		http://biocol.org/urn:lsid:biocol.org:col:15859			Tropicos	Tropicos	MOBOT	PRESERVED_SPECIMEN				urn:catalog:MO:Tropicos:209198	209198	Randriamampionona 87	BÃ©bÃ©ronn Randriamampionona		8											PRESENT
4061605886		http://www.tropicos.org/Specimen/534240		CC_BY_4_0				Missouri Botanical Garden	PhysicalObject		http://biocol.org/urn:lsid:biocol.org:col:15859			Tropicos	Tropicos	MOBOT	PRESERVED_SPECIMEN				urn:catalog:MO:Tropicos:534240	534240	Nkhoma 275	C.N. Nkhoma;et al.		6											PRESENT
4061605524		http://www.tropicos.org/Specimen/207919		CC_BY_4_0				Missouri Botanical Garden	PhysicalObject		http://biocol.org/urn:lsid:biocol.org:col:15859			Tropicos	Tropicos	MOBOT	PRESERVED_SPECIMEN				urn:catalog:MO:Tropicos:207919	207919	Lovett 4714	J.C. Lovett;C.J. Kayombo		12											PRESENT
4061595573		http://www.tropicos.org/Specimen/209082		CC_BY_4_0				Missouri Botanical Garden	PhysicalObject		http://biocol.org/urn:lsid:biocol.org:col:15859			Tropicos	Tropicos	MOBOT	PRESERVED_SPECIMEN				urn:catalog:MO:Tropicos:209082	209082	Andrianantoanina 235	Olivier Andrianantoanina		10											PRESENT
4061573302		http://www.tropicos.org/Specimen/1539413		CC_BY_4_0				Missouri Botanical Garden	PhysicalObject		http://biocol.org/urn:lsid:biocol.org:col:15859			Tropicos	Tropicos	MOBOT	PRESERVED_SPECIMEN				urn:catalog:MO:Tropicos:1539413	1539413	Kindeketa 543	William J. Kindeketa		7											PRESENT
4061570740		http://www.tropicos.org/Specimen/102241781		CC_BY_4_0				Missouri Botanical Garden	PhysicalObject		http://biocol.org/urn:lsid:biocol.org:col:15859		TAN	Tropicos	Tropicos	MOBOT	PRESERVED_SPECIMEN				urn:catalog:MO:Tropicos:102241781	102241781	Rakotovao 2773	Charles Rakotovao;et al.		3											PRESENT
4061569891		http://www.tropicos.org/Specimen/535651		CC_BY_4_0				Missouri Botanical Garden	PhysicalObject		http://biocol.org/urn:lsid:biocol.org:col:15859			Tropicos	Tropicos	MOBOT	PRESERVED_SPECIMEN				urn:catalog:MO:Tropicos:535651	535651	Harder 3181	Daniel K. Harder;et al.		6											PRESENT
4061564145		http://www.tropicos.org/Specimen/1884492		CC_BY_4_0				Missouri Botanical Garden	PhysicalObject		http://biocol.org/urn:lsid:biocol.org:col:15859			Tropicos	Tropicos	MOBOT	PRESERVED_SPECIMEN				urn:catalog:MO:Tropicos:1884492	1884492	Abeid 1026	Y.S. Abeid;F.M. Mbago;A. Kashura		5											PRESENT
4061560203		http://www.tropicos.org/Specimen/1516852		CC_BY_4_0				Missouri Botanical Garden	PhysicalObject		http://biocol.org/urn:lsid:biocol.org:col:15859			Tropicos	Tropicos	MOBOT	PRESERVED_SPECIMEN				urn:catalog:MO:Tropicos:1516852	1516852	Sallu 422	A. Ntemi Sallu		5											PRESENT
4061560171		http://www.tropicos.org/Specimen/1515466		CC_BY_4_0				Missouri Botanical Garden	PhysicalObject		http://biocol.org/urn:lsid:biocol.org:col:15859			Tropicos	Tropicos	MOBOT	PRESERVED_SPECIMEN				urn:catalog:MO:Tropicos:1515466	1515466	Mlangwa 317	John A. Mlangwa		8											PRESENT
4061550012		http://www.tropicos.org/Specimen/102199044		CC_BY_4_0				Missouri Botanical Garden	PhysicalObject		http://biocol.org/urn:lsid:biocol.org:col:15859		TAN	Tropicos	Tropicos	MOBOT	PRESERVED_SPECIMEN				urn:catalog:MO:Tropicos:102199044	102199044	Razanatsoa 189	H. Razanatsoa		3											PRESENT
4061543297		http://www.tropicos.org/Specimen/1437575		CC_BY_4_0				Missouri Botanical Garden	PhysicalObject		http://biocol.org/urn:lsid:biocol.org:col:15859			Tropicos	Tropicos	MOBOT	PRESERVED_SPECIMEN				urn:catalog:MO:Tropicos:1437575	1437575	Mwangoka 539	Moses A. Mwangoka		6											PRESENT
4061535955		http://www.tropicos.org/Specimen/102213990		CC_BY_4_0				Missouri Botanical Garden	PhysicalObject		http://biocol.org/urn:lsid:biocol.org:col:15859		TAN	Tropicos	Tropicos	MOBOT	PRESERVED_SPECIMEN				urn:catalog:MO:Tropicos:102213990	102213990	Rakotovao 1812	Charles Rakotovao;FÃ©lix Edmond		5											PRESENT
4061520066		http://www.tropicos.org/Specimen/1509403		CC_BY_4_0				Missouri Botanical Garden	PhysicalObject		http://biocol.org/urn:lsid:biocol.org:col:15859			Tropicos	Tropicos	MOBOT	PRESERVED_SPECIMEN				urn:catalog:MO:Tropicos:1509403	1509403	Walters 501	Gretchen Walters;et al.		4											PRESENT
4061519595		http://www.tropicos.org/Specimen/1457483		CC_BY_4_0				Missouri Botanical Garden	PhysicalObject		http://biocol.org/urn:lsid:biocol.org:col:15859			Tropicos	Tropicos	MOBOT	PRESERVED_SPECIMEN				urn:catalog:MO:Tropicos:1457483	1457483	Kayombo 2785	C.J. Kayombo;S. Kikoti		7											PRESENT
4061504385		http://www.tropicos.org/Specimen/1348891		CC_BY_4_0				Missouri Botanical Garden	PhysicalObject		http://biocol.org/urn:lsid:biocol.org:col:15859			Tropicos	Tropicos	MOBOT	PRESERVED_SPECIMEN				urn:catalog:MO:Tropicos:1348891	1348891	Mwangoka 445	Moses A. Mwangoka		6											PRESENT
4061501550		http://www.tropicos.org/Specimen/102198325		CC_BY_4_0				Missouri Botanical Garden	PhysicalObject		http://biocol.org/urn:lsid:biocol.org:col:15859		TAN	Tropicos	Tropicos	MOBOT	PRESERVED_SPECIMEN				urn:catalog:MO:Tropicos:102198325	102198325	Razanatsoa 147	H. Razanatsoa		5											PRESENT
4061498678		http://www.tropicos.org/Specimen/102460820		CC_BY_4_0				Missouri Botanical Garden	PhysicalObject		http://biocol.org/urn:lsid:biocol.org:col:15859		TAN	Tropicos	Tropicos	MOBOT	PRESERVED_SPECIMEN				urn:catalog:MO:Tropicos:102460820	102460820	Rabenantoandro 1752	Johny Rabenantoandro;E. Ramisy		5											PRESENT
4061478266		http://www.tropicos.org/Specimen/1216164		CC_BY_4_0				Missouri Botanical Garden	PhysicalObject		http://biocol.org/urn:lsid:biocol.org:col:15859			Tropicos	Tropicos	MOBOT	PRESERVED_SPECIMEN				urn:catalog:MO:Tropicos:1216164	1216164	Kotozafy 741	Alphonse Kotozafy;Paul Rasabo;F. Ratalata		2											PRESENT
4061455828		http://www.tropicos.org/Specimen/1056802		CC_BY_4_0				Missouri Botanical Garden	PhysicalObject		http://biocol.org/urn:lsid:biocol.org:col:15859			Tropicos	Tropicos	MOBOT	PRESERVED_SPECIMEN				urn:catalog:MO:Tropicos:1056802	1056802	Ravelonarivo 89	DÃ©sirÃ© Ravelonarivo;et al.		6											PRESENT
4061455392		http://www.tropicos.org/Specimen/990210		CC_BY_4_0				Missouri Botanical Garden	PhysicalObject		http://biocol.org/urn:lsid:biocol.org:col:15859			Tropicos	Tropicos	MOBOT	PRESERVED_SPECIMEN				urn:catalog:MO:Tropicos:990210	990210	Rwaburindore 3889	P.K. Rwaburindore		6											PRESENT
4061448584		http://www.tropicos.org/Specimen/921822		CC_BY_4_0				Missouri Botanical Garden	PhysicalObject		http://biocol.org/urn:lsid:biocol.org:col:15859			Tropicos	Tropicos	MOBOT	PRESERVED_SPECIMEN				urn:catalog:MO:Tropicos:921822	921822	Kotozafy 432	Alphonse Kotozafy		2											PRESENT
4061448583		http://www.tropicos.org/Specimen/921811		CC_BY_4_0				Missouri Botanical Garden	PhysicalObject		http://biocol.org/urn:lsid:biocol.org:col:15859			Tropicos	Tropicos	MOBOT	PRESERVED_SPECIMEN				urn:catalog:MO:Tropicos:921811	921811	Kotozafy 426	Alphonse Kotozafy		4											PRESENT
4061441628		http://www.tropicos.org/Specimen/921812		CC_BY_4_0				Missouri Botanical Garden	PhysicalObject		http://biocol.org/urn:lsid:biocol.org:col:15859			Tropicos	Tropicos	MOBOT	PRESERVED_SPECIMEN				urn:catalog:MO:Tropicos:921812	921812	Kotozafy 427	Alphonse Kotozafy		2											PRESENT
4061431946		http://www.tropicos.org/Specimen/103233395		CC_BY_4_0				Missouri Botanical Garden	PhysicalObject		http://biocol.org/urn:lsid:biocol.org:col:15859		LBV	Tropicos	Tropicos	MOBOT	PRESERVED_SPECIMEN				urn:catalog:MO:Tropicos:103233395	103233395	RelevÃ© 64	USTM RelevÃ©;Raoul Niangadouma;Christ Bikoukou;Jacques BiÃ© Mba;Roland Mitola;Jan Klein;Teddy Ombama Obaka		2											PRESENT
4061424557		http://www.tropicos.org/Specimen/205932		CC_BY_4_0				Missouri Botanical Garden	PhysicalObject		http://biocol.org/urn:lsid:biocol.org:col:15859			Tropicos	Tropicos	MOBOT	PRESERVED_SPECIMEN				urn:catalog:MO:Tropicos:205932	205932	Gereau 5422	Roy E. Gereau;et al.		6											PRESENT
4061418697		http://www.tropicos.org/Specimen/101977092		CC_BY_4_0				Missouri Botanical Garden	PhysicalObject		http://biocol.org/urn:lsid:biocol.org:col:15859		TAN	Tropicos	Tropicos	MOBOT	PRESERVED_SPECIMEN				urn:catalog:MO:Tropicos:101977092	101977092	Andriamihajarivo 33	Tefy Andriamihajarivo		6											PRESENT
4061416195		http://www.tropicos.org/Specimen/103208679		CC_BY_4_0				Missouri Botanical Garden	PhysicalObject		http://biocol.org/urn:lsid:biocol.org:col:15859		BRLU	Tropicos	Tropicos	MOBOT	PRESERVED_SPECIMEN				urn:catalog:MO:Tropicos:103208679	103208679	Transects 1970	Transects GuinÃ©e;Moussa DiabatÃ©;Mohamed DiabatÃ©;Oumar TraorÃ©		2											PRESENT
4061403419		http://www.tropicos.org/Specimen/101940797		CC_BY_4_0				Missouri Botanical Garden	PhysicalObject		http://biocol.org/urn:lsid:biocol.org:col:15859		CNARP	Tropicos	Tropicos	MOBOT	PRESERVED_SPECIMEN				urn:catalog:MO:Tropicos:101940797	101940797	Andrianjafy 205	N.M. Andrianjafy;et al.		6											PRESENT
4061401225		http://www.tropicos.org/Specimen/103184902		CC_BY_4_0				Missouri Botanical Garden	PhysicalObject		http://biocol.org/urn:lsid:biocol.org:col:15859		WAG	Tropicos	Tropicos	MOBOT	PRESERVED_SPECIMEN				urn:catalog:MO:Tropicos:103184902	103184902	Lima 29	Angela Lima;AntÃ³nio Camuenha;Dilson Madre Deus;EstevÃ£o Soares;Lewis Eduardo;Pascoal Sousa		5											PRESENT
4061400988		http://www.tropicos.org/Specimen/103179919		CC_BY_4_0				Missouri Botanical Garden	PhysicalObject		http://biocol.org/urn:lsid:biocol.org:col:15859		STPH	Tropicos	Tropicos	MOBOT	PRESERVED_SPECIMEN				urn:catalog:MO:Tropicos:103179919	103179919	Dias 155	Davide Dias;Dionisio Fernandes		9											PRESENT
4061398820		http://www.tropicos.org/Specimen/103184439		CC_BY_4_0				Missouri Botanical Garden	PhysicalObject		http://biocol.org/urn:lsid:biocol.org:col:15859		STPH	Tropicos	Tropicos	MOBOT	PRESERVED_SPECIMEN				urn:catalog:MO:Tropicos:103184439	103184439	Eduardo 130	Lewis Eduardo;Angela Lima;Dilson Madre Deus;Pascoal Sousa;EstevÃ£o Soares;AntÃ³nio Camuenha		4											PRESENT
4061398583		http://www.tropicos.org/Specimen/103179918		CC_BY_4_0				Missouri Botanical Garden	PhysicalObject		http://biocol.org/urn:lsid:biocol.org:col:15859		COI	Tropicos	Tropicos	MOBOT	PRESERVED_SPECIMEN				urn:catalog:MO:Tropicos:103179918	103179918	Dias 155	Davide Dias;Dionisio Fernandes		9											PRESENT
4061394960		http://www.tropicos.org/Specimen/103235027		CC_BY_4_0				Missouri Botanical Garden	PhysicalObject		http://biocol.org/urn:lsid:biocol.org:col:15859		TAN	Tropicos	Tropicos	MOBOT	PRESERVED_SPECIMEN				urn:catalog:MO:Tropicos:103235027	103235027	Razakamalala 9075	Richard Razakamalala		3											PRESENT
4061394818		http://www.tropicos.org/Specimen/103232189		CC_BY_4_0				Missouri Botanical Garden	PhysicalObject		http://biocol.org/urn:lsid:biocol.org:col:15859		LBV	Tropicos	Tropicos	MOBOT	PRESERVED_SPECIMEN				urn:catalog:MO:Tropicos:103232189	103232189	Ikabanga 1699	Davy Ikabanga;Raoul Niangadouma;Christ Bikoukou;Jacques BiÃ© Mba;Roland Mitola;Jan Klein		2											PRESENT
4061394577		http://www.tropicos.org/Specimen/103226227		CC_BY_4_0				Missouri Botanical Garden	PhysicalObject		http://biocol.org/urn:lsid:biocol.org:col:15859		TAN	Tropicos	Tropicos	MOBOT	PRESERVED_SPECIMEN				urn:catalog:MO:Tropicos:103226227	103226227	Randriatahina 122	Randriatahina, James		5											PRESENT
4061377969		http://www.tropicos.org/Specimen/103213038		CC_BY_4_0				Missouri Botanical Garden	PhysicalObject		http://biocol.org/urn:lsid:biocol.org:col:15859		BRLU	Tropicos	Tropicos	MOBOT	PRESERVED_SPECIMEN				urn:catalog:MO:Tropicos:103213038	103213038	KoÃ¯vogui 576	Kolou KoÃ¯vogui;Moussa DiabatÃ©;Oumar TraorÃ©;Mohamed DiabatÃ©;Lansana KonatÃ©		6											PRESENT
4061368791		http://www.tropicos.org/Specimen/103138047		CC_BY_4_0				Missouri Botanical Garden	PhysicalObject		http://biocol.org/urn:lsid:biocol.org:col:15859		COI	Tropicos	Tropicos	MOBOT	PRESERVED_SPECIMEN				urn:catalog:MO:Tropicos:103138047	103138047	Ikabanga 1131	Davy Ikabanga;Diosdado Nguema;Antonio Alberto;Dilson Madre Deus;Pascoal Sousa;Angela Lima		5											PRESENT
4061366876		http://www.tropicos.org/Specimen/103180871		CC_BY_4_0				Missouri Botanical Garden	PhysicalObject		http://biocol.org/urn:lsid:biocol.org:col:15859		BRLU	Tropicos	Tropicos	MOBOT	PRESERVED_SPECIMEN				urn:catalog:MO:Tropicos:103180871	103180871	DiabatÃ© 4859	Moussa DiabatÃ©;Mohamed DiabatÃ©;Lansana KonatÃ©		7											PRESENT
4061366822		http://www.tropicos.org/Specimen/103179914		CC_BY_4_0				Missouri Botanical Garden	PhysicalObject		http://biocol.org/urn:lsid:biocol.org:col:15859		PRP	Tropicos	Tropicos	MOBOT	PRESERVED_SPECIMEN				urn:catalog:MO:Tropicos:103179914	103179914	Dias 153	Davide Dias;Osvaldo Lima;Jeremias Prazeres;JosÃ© Tavares;Dionisio Fernandes;Laura Benitez		6											PRESENT
4061363734		http://www.tropicos.org/Specimen/103184905		CC_BY_4_0				Missouri Botanical Garden	PhysicalObject		http://biocol.org/urn:lsid:biocol.org:col:15859		STPH	Tropicos	Tropicos	MOBOT	PRESERVED_SPECIMEN				urn:catalog:MO:Tropicos:103184905	103184905	Lima 29	Angela Lima;AntÃ³nio Camuenha;Dilson Madre Deus;EstevÃ£o Soares;Lewis Eduardo;Pascoal Sousa		5											PRESENT
4061363717		http://www.tropicos.org/Specimen/103184394		CC_BY_4_0				Missouri Botanical Garden	PhysicalObject		http://biocol.org/urn:lsid:biocol.org:col:15859		STPH	Tropicos	Tropicos	MOBOT	PRESERVED_SPECIMEN				urn:catalog:MO:Tropicos:103184394	103184394	Eduardo 106b	Lewis Eduardo;Maria do CÃ©u;Angela Lima;Pascoal Sousa;Dilson Madre Deus;AntÃ³nio Camuenha;EstevÃ£o Soares		5											PRESENT
4061363656		http://www.tropicos.org/Specimen/103182848		CC_BY_4_0				Missouri Botanical Garden	PhysicalObject		http://biocol.org/urn:lsid:biocol.org:col:15859		STPH	Tropicos	Tropicos	MOBOT	PRESERVED_SPECIMEN				urn:catalog:MO:Tropicos:103182848	103182848	Transects 1074	Transects Principe;Davide Dias;Osvaldo Lima;Jeremias Prazeres;RocilÃ£o do Carmo		4											PRESENT
4061362421		http://www.tropicos.org/Specimen/101956122		CC_BY_4_0				Missouri Botanical Garden	PhysicalObject		http://biocol.org/urn:lsid:biocol.org:col:15859		US	Tropicos	Tropicos	MOBOT	PRESERVED_SPECIMEN				urn:catalog:MO:Tropicos:101956122	101956122	Niangadouma 141	Raoul Niangadouma;Gretchen Walters		3											PRESENT
4061356917		http://www.tropicos.org/Specimen/103184437		CC_BY_4_0				Missouri Botanical Garden	PhysicalObject		http://biocol.org/urn:lsid:biocol.org:col:15859		COI	Tropicos	Tropicos	MOBOT	PRESERVED_SPECIMEN				urn:catalog:MO:Tropicos:103184437	103184437	Eduardo 130	Lewis Eduardo;Angela Lima;Dilson Madre Deus;Pascoal Sousa;EstevÃ£o Soares;AntÃ³nio Camuenha		4											PRESENT
4061342121		http://www.tropicos.org/Specimen/103167948		CC_BY_4_0				Missouri Botanical Garden	PhysicalObject		http://biocol.org/urn:lsid:biocol.org:col:15859		STPH	Tropicos	Tropicos	MOBOT	PRESERVED_SPECIMEN				urn:catalog:MO:Tropicos:103167948	103167948	Transects 31	Transects Sao TomÃ©;Laura Benitez;EstevÃ£o Soares;Davide Dias;Davy Ikabanga		2											PRESENT
4061341456		http://www.tropicos.org/Specimen/103150711		CC_BY_4_0				Missouri Botanical Garden	PhysicalObject		http://biocol.org/urn:lsid:biocol.org:col:15859		TAN	Tropicos	Tropicos	MOBOT	PRESERVED_SPECIMEN				urn:catalog:MO:Tropicos:103150711	103150711	Martial 742	Martial		5											PRESENT
4061337249		http://www.tropicos.org/Specimen/101819002		CC_BY_4_0				Missouri Botanical Garden	PhysicalObject		http://biocol.org/urn:lsid:biocol.org:col:15859		TAN	Tropicos	Tropicos	MOBOT	PRESERVED_SPECIMEN				urn:catalog:MO:Tropicos:101819002	101819002	Kotozafy 993	Alphonse Kotozafy		4											PRESENT
4061337233		http://www.tropicos.org/Specimen/101818430		CC_BY_4_0				Missouri Botanical Garden	PhysicalObject		http://biocol.org/urn:lsid:biocol.org:col:15859		TAN	Tropicos	Tropicos	MOBOT	PRESERVED_SPECIMEN				urn:catalog:MO:Tropicos:101818430	101818430	Andrianantoanina 205	Olivier Andrianantoanina;R. Bezana		10											PRESENT
4061335032		http://www.tropicos.org/Specimen/103147566		CC_BY_4_0				Missouri Botanical Garden	PhysicalObject		http://biocol.org/urn:lsid:biocol.org:col:15859		BRLU	Tropicos	Tropicos	MOBOT	PRESERVED_SPECIMEN				urn:catalog:MO:Tropicos:103147566	103147566	KoÃ¯vogui 156	Kolou KoÃ¯vogui;Moussa DiabatÃ©;Philomena Yarwoah;Lansana KonatÃ©		6											PRESENT
4061334658		http://www.tropicos.org/Specimen/103140196		CC_BY_4_0				Missouri Botanical Garden	PhysicalObject		http://biocol.org/urn:lsid:biocol.org:col:15859		SERG	Tropicos	Tropicos	MOBOT	PRESERVED_SPECIMEN				urn:catalog:MO:Tropicos:103140196	103140196	Yarwoah 170	Philomena Yarwoah;Lansana KonatÃ©		4											PRESENT
4061334544		http://www.tropicos.org/Specimen/103137831		CC_BY_4_0				Missouri Botanical Garden	PhysicalObject		http://biocol.org/urn:lsid:biocol.org:col:15859		STPH	Tropicos	Tropicos	MOBOT	PRESERVED_SPECIMEN				urn:catalog:MO:Tropicos:103137831	103137831	Ikabanga 1066	Davy Ikabanga;Diosdado Nguema;Maria do CÃ©u;Antonio Alberto;Lewis Eduardo;Dilson Madre Deus;Pascoal Sousa;Angela Lima		4											PRESENT
4061327672		http://www.tropicos.org/Specimen/101794986		CC_BY_4_0				Missouri Botanical Garden	PhysicalObject		http://biocol.org/urn:lsid:biocol.org:col:15859		TAN	Tropicos	Tropicos	MOBOT	PRESERVED_SPECIMEN				urn:catalog:MO:Tropicos:101794986	101794986	Laha 49	Rolland Laha		5											PRESENT
4061317739		http://www.tropicos.org/Specimen/101874628		CC_BY_4_0				Missouri Botanical Garden	PhysicalObject		http://biocol.org/urn:lsid:biocol.org:col:15859		DSM	Tropicos	Tropicos	MOBOT	PRESERVED_SPECIMEN				urn:catalog:MO:Tropicos:101874628	101874628	Mhoro 209	B.E. Mhoro		1											PRESENT
4061310438		http://www.tropicos.org/Specimen/103015530		CC_BY_4_0				Missouri Botanical Garden	PhysicalObject		http://biocol.org/urn:lsid:biocol.org:col:15859		K	Tropicos	Tropicos	MOBOT	PRESERVED_SPECIMEN				urn:catalog:MO:Tropicos:103015530	103015530	Trigui 377	S.M. Trigui;M.H. Razanajatovo;S.D. Ramandimbimanana		6											PRESENT
4061306194		http://www.tropicos.org/Specimen/103104853		CC_BY_4_0				Missouri Botanical Garden	PhysicalObject		http://biocol.org/urn:lsid:biocol.org:col:15859		PRP	Tropicos	Tropicos	MOBOT	PRESERVED_SPECIMEN				urn:catalog:MO:Tropicos:103104853	103104853	Transects 109bis	Transects Principe;Tariq StÃ©vart;Davide Dias;Laura Benitez;Faustino de Oliveira;Balou Rocha													PRESENT
4061292409		http://www.tropicos.org/Specimen/103151385		CC_BY_4_0				Missouri Botanical Garden	PhysicalObject		http://biocol.org/urn:lsid:biocol.org:col:15859		TAN	Tropicos	Tropicos	MOBOT	PRESERVED_SPECIMEN				urn:catalog:MO:Tropicos:103151385	103151385	Rivoharison 136	T.V. Rivoharison		5											PRESENT
4061292298		http://www.tropicos.org/Specimen/103021183		CC_BY_4_0				Missouri Botanical Garden	PhysicalObject		http://biocol.org/urn:lsid:biocol.org:col:15859		TAN	Tropicos	Tropicos	MOBOT	PRESERVED_SPECIMEN				urn:catalog:MO:Tropicos:103021183	103021183	Rakotonirina 156	Giovanni A. Rakotonirina;P. Antilahimena;Anthony R. Syde		5											PRESENT
4061278224		http://www.tropicos.org/Specimen/103147568		CC_BY_4_0				Missouri Botanical Garden	PhysicalObject		http://biocol.org/urn:lsid:biocol.org:col:15859		HNG	Tropicos	Tropicos	MOBOT	PRESERVED_SPECIMEN				urn:catalog:MO:Tropicos:103147568	103147568	KoÃ¯vogui 156	Kolou KoÃ¯vogui;Moussa DiabatÃ©;Philomena Yarwoah;Lansana KonatÃ©		6											PRESENT
4061263026		http://www.tropicos.org/Specimen/102959606		CC_BY_4_0				Missouri Botanical Garden	PhysicalObject		http://biocol.org/urn:lsid:biocol.org:col:15859		LBV	Tropicos	Tropicos	MOBOT	PRESERVED_SPECIMEN				urn:catalog:MO:Tropicos:102959606	102959606	Nguema 2647	Diosdado Nguema;HervÃ© Memiague;P. Bissiemou;Etienne Mounoumoulossi		3											PRESENT
4061257676		http://www.tropicos.org/Specimen/103016853		CC_BY_4_0				Missouri Botanical Garden	PhysicalObject		http://biocol.org/urn:lsid:biocol.org:col:15859		WAG	Tropicos	Tropicos	MOBOT	PRESERVED_SPECIMEN				urn:catalog:MO:Tropicos:103016853	103016853	Texier 802	Nicolas Texier;Raoul Niangadouma;Diosdado Nguema;Eric Akouangou;Jean de Dieu Kaparidi;Elie Nzigou Doubindou		4											PRESENT
4061257594		http://www.tropicos.org/Specimen/103015533		CC_BY_4_0				Missouri Botanical Garden	PhysicalObject		http://biocol.org/urn:lsid:biocol.org:col:15859		WAG	Tropicos	Tropicos	MOBOT	PRESERVED_SPECIMEN				urn:catalog:MO:Tropicos:103015533	103015533	Trigui 377	S.M. Trigui;M.H. Razanajatovo;S.D. Ramandimbimanana		6											PRESENT
4061257369		http://www.tropicos.org/Specimen/103011485		CC_BY_4_0				Missouri Botanical Garden	PhysicalObject		http://biocol.org/urn:lsid:biocol.org:col:15859		P	Tropicos	Tropicos	MOBOT	PRESERVED_SPECIMEN				urn:catalog:MO:Tropicos:103011485	103011485	Ramandimbimanana 51	S.D. Ramandimbimanana		4											PRESENT
4061246558		http://www.tropicos.org/Specimen/102930455		CC_BY_4_0				Missouri Botanical Garden	PhysicalObject		http://biocol.org/urn:lsid:biocol.org:col:15859		TAN	Tropicos	Tropicos	MOBOT	PRESERVED_SPECIMEN				urn:catalog:MO:Tropicos:102930455	102930455	Andriamanantena 50	Andriamanantena;Gervais		5											PRESENT
4061239802		http://www.tropicos.org/Specimen/103014327		CC_BY_4_0				Missouri Botanical Garden	PhysicalObject		http://biocol.org/urn:lsid:biocol.org:col:15859		K	Tropicos	Tropicos	MOBOT	PRESERVED_SPECIMEN				urn:catalog:MO:Tropicos:103014327	103014327	Tahinarivony 619	A. J. Tahinarivony;N.S. Rasoanaivo		5											PRESENT
4061224488		http://www.tropicos.org/Specimen/102982911		CC_BY_4_0				Missouri Botanical Garden	PhysicalObject		http://biocol.org/urn:lsid:biocol.org:col:15859		P	Tropicos	Tropicos	MOBOT	PRESERVED_SPECIMEN				urn:catalog:MO:Tropicos:102982911	102982911	Birkinshaw 2208	Chris Birkinshaw		1											PRESENT
4061216930		http://www.tropicos.org/Specimen/102867822		CC_BY_4_0				Missouri Botanical Garden	PhysicalObject		http://biocol.org/urn:lsid:biocol.org:col:15859		K	Tropicos	Tropicos	MOBOT	PRESERVED_SPECIMEN				urn:catalog:MO:Tropicos:102867822	102867822	Tahinarivony 233	A. J. Tahinarivony;Mintina Roberta Cathy Madiomanana;Morgane Ammann		6											PRESENT
4061213259		http://www.tropicos.org/Specimen/102959450		CC_BY_4_0				Missouri Botanical Garden	PhysicalObject		http://biocol.org/urn:lsid:biocol.org:col:15859		LBV	Tropicos	Tropicos	MOBOT	PRESERVED_SPECIMEN				urn:catalog:MO:Tropicos:102959450	102959450	Nguema 2564	Diosdado Nguema;HervÃ© Memiague;P. Bissiemou;Etienne Mounoumoulossi		3											PRESENT
4061207800		http://www.tropicos.org/Specimen/102933687		CC_BY_4_0				Missouri Botanical Garden	PhysicalObject		http://biocol.org/urn:lsid:biocol.org:col:15859		MA	Tropicos	Tropicos	MOBOT	PRESERVED_SPECIMEN				urn:catalog:MO:Tropicos:102933687	102933687	Gereau 7420	Roy E. Gereau;Marc S.M. Sosef;Gilbert Paluku;Jeanne Mbey;J. Amboko		5											PRESENT
4061205764		http://www.tropicos.org/Specimen/103016855		CC_BY_4_0				Missouri Botanical Garden	PhysicalObject		http://biocol.org/urn:lsid:biocol.org:col:15859		LBV	Tropicos	Tropicos	MOBOT	PRESERVED_SPECIMEN				urn:catalog:MO:Tropicos:103016855	103016855	Texier 802	Nicolas Texier;Raoul Niangadouma;Diosdado Nguema;Eric Akouangou;Jean de Dieu Kaparidi;Elie Nzigou Doubindou		4											PRESENT
4061199590		http://www.tropicos.org/Specimen/102889465		CC_BY_4_0				Missouri Botanical Garden	PhysicalObject		http://biocol.org/urn:lsid:biocol.org:col:15859		TAN	Tropicos	Tropicos	MOBOT	PRESERVED_SPECIMEN				urn:catalog:MO:Tropicos:102889465	102889465	Martial 161	Martial;Casmir Z. Rakotonirina;Georges Be		4											PRESENT
4061196258		http://www.tropicos.org/Specimen/102928353		CC_BY_4_0				Missouri Botanical Garden	PhysicalObject		http://biocol.org/urn:lsid:biocol.org:col:15859		BR	Tropicos	Tropicos	MOBOT	PRESERVED_SPECIMEN				urn:catalog:MO:Tropicos:102928353	102928353	Ikabanga 516	Davy Ikabanga;AurÃ©lien Mokea		6											PRESENT
4061178654		http://www.tropicos.org/Specimen/102896094		CC_BY_4_0				Missouri Botanical Garden	PhysicalObject		http://biocol.org/urn:lsid:biocol.org:col:15859		TAN	Tropicos	Tropicos	MOBOT	PRESERVED_SPECIMEN				urn:catalog:MO:Tropicos:102896094	102896094	Randrianaivo 2530	Richard Randrianaivo;D. Rabary;Jean Chrysostome Bevao		4											PRESENT
4061176353		http://www.tropicos.org/Specimen/102863782		CC_BY_4_0				Missouri Botanical Garden	PhysicalObject		http://biocol.org/urn:lsid:biocol.org:col:15859		US	Tropicos	Tropicos	MOBOT	PRESERVED_SPECIMEN				urn:catalog:MO:Tropicos:102863782	102863782	Ikabanga 19	Davy Ikabanga		4											PRESENT
4061165789		http://www.tropicos.org/Specimen/102775356		CC_BY_4_0				Missouri Botanical Garden	PhysicalObject		http://biocol.org/urn:lsid:biocol.org:col:15859		LBV	Tropicos	Tropicos	MOBOT	PRESERVED_SPECIMEN				urn:catalog:MO:Tropicos:102775356	102775356	StÃ©vart 4172	Tariq StÃ©vart;Yves Azizet IssembÃ©		5											PRESENT
4061160565		http://www.tropicos.org/Specimen/102928355		CC_BY_4_0				Missouri Botanical Garden	PhysicalObject		http://biocol.org/urn:lsid:biocol.org:col:15859		LBV	Tropicos	Tropicos	MOBOT	PRESERVED_SPECIMEN				urn:catalog:MO:Tropicos:102928355	102928355	Ikabanga 516	Davy Ikabanga;AurÃ©lien Mokea		6											PRESENT
4061134930		http://www.tropicos.org/Specimen/102734314		CC_BY_4_0				Missouri Botanical Garden	PhysicalObject		http://biocol.org/urn:lsid:biocol.org:col:15859		WAG	Tropicos	Tropicos	MOBOT	PRESERVED_SPECIMEN				urn:catalog:MO:Tropicos:102734314	102734314	Jongkind 7565	C. C. H. Jongkind;N.-S. Loua;J.-L. HoliÃ©		2											PRESENT
4061126371		http://www.tropicos.org/Specimen/101134164		CC_BY_4_0				Missouri Botanical Garden	PhysicalObject		http://biocol.org/urn:lsid:biocol.org:col:15859			Tropicos	Tropicos	MOBOT	PRESERVED_SPECIMEN				urn:catalog:MO:Tropicos:101134164	101134164	Transects 104	Transects Principe;Tariq StÃ©vart;Davide Dias;Laura Benitez;Faustino de Oliveira;Balou Rocha													PRESENT
4061120711		http://www.tropicos.org/Specimen/102740805		CC_BY_4_0				Missouri Botanical Garden	PhysicalObject		http://biocol.org/urn:lsid:biocol.org:col:15859		SERG	Tropicos	Tropicos	MOBOT	PRESERVED_SPECIMEN				urn:catalog:MO:Tropicos:102740805	102740805	Bidault 177	Ehoarn Bidault;Moussa DiabatÃ©;Tariq StÃ©vart;D. Bilivogui;Gononan TraorÃ©		3											PRESENT
4061096958		http://www.tropicos.org/Specimen/102748023		CC_BY_4_0				Missouri Botanical Garden	PhysicalObject		http://biocol.org/urn:lsid:biocol.org:col:15859		YA	Tropicos	Tropicos	MOBOT	PRESERVED_SPECIMEN				urn:catalog:MO:Tropicos:102748023	102748023	Sainge 95	M. Sainge		6											PRESENT
4061090122		http://www.tropicos.org/Specimen/3626392		CC_BY_4_0				Missouri Botanical Garden	PhysicalObject		http://biocol.org/urn:lsid:biocol.org:col:15859			Tropicos	Tropicos	MOBOT	PRESERVED_SPECIMEN				urn:catalog:MO:Tropicos:3626392	3626392	Nguema 841	Diosdado Nguema		1											PRESENT
4061068562		http://www.tropicos.org/Specimen/3251071		CC_BY_4_0				Missouri Botanical Garden	PhysicalObject		http://biocol.org/urn:lsid:biocol.org:col:15859			Tropicos	Tropicos	MOBOT	PRESERVED_SPECIMEN				urn:catalog:MO:Tropicos:3251071	3251071	Commerson s.n.	P. Commerson													PRESENT
4061050366		http://www.tropicos.org/Specimen/2858451		CC_BY_4_0				Missouri Botanical Garden	PhysicalObject		http://biocol.org/urn:lsid:biocol.org:col:15859			Tropicos	Tropicos	MOBOT	PRESERVED_SPECIMEN				urn:catalog:MO:Tropicos:2858451	2858451	Kayombo 5059	C.J. Kayombo		5											PRESENT
4061034668		http://www.tropicos.org/Specimen/102557468		CC_BY_4_0				Missouri Botanical Garden	PhysicalObject		http://biocol.org/urn:lsid:biocol.org:col:15859		EA	Tropicos	Tropicos	MOBOT	PRESERVED_SPECIMEN				urn:catalog:MO:Tropicos:102557468	102557468	Luke 12066	W.R.Q. Luke;Fermin		1											PRESENT
4061028786		http://www.tropicos.org/Specimen/1920715		CC_BY_4_0				Missouri Botanical Garden	PhysicalObject		http://biocol.org/urn:lsid:biocol.org:col:15859			Tropicos	Tropicos	MOBOT	PRESERVED_SPECIMEN				urn:catalog:MO:Tropicos:1920715	1920715	Gilagiza 28	B.M. Gilagiza		6											PRESENT
4061028669		http://www.tropicos.org/Specimen/1891499		CC_BY_4_0				Missouri Botanical Garden	PhysicalObject		http://biocol.org/urn:lsid:biocol.org:col:15859			Tropicos	Tropicos	MOBOT	PRESERVED_SPECIMEN				urn:catalog:MO:Tropicos:1891499	1891499	Wilks 2395	Chris M. Wilks;Augustin Moungazi		7											PRESENT
4061020717		http://www.tropicos.org/Specimen/1896414		CC_BY_4_0				Missouri Botanical Garden	PhysicalObject		http://biocol.org/urn:lsid:biocol.org:col:15859			Tropicos	Tropicos	MOBOT	PRESERVED_SPECIMEN				urn:catalog:MO:Tropicos:1896414	1896414	Aridy 445	J. Aridy		4											PRESENT
4061019480		http://www.tropicos.org/Specimen/1921002		CC_BY_4_0				Missouri Botanical Garden	PhysicalObject		http://biocol.org/urn:lsid:biocol.org:col:15859			Tropicos	Tropicos	MOBOT	PRESERVED_SPECIMEN				urn:catalog:MO:Tropicos:1921002	1921002	Gilagiza 92	B.M. Gilagiza		6											PRESENT
4061017541		http://www.tropicos.org/Specimen/2124166		CC_BY_4_0				Missouri Botanical Garden	PhysicalObject		http://biocol.org/urn:lsid:biocol.org:col:15859			Tropicos	Tropicos	MOBOT	PRESERVED_SPECIMEN				urn:catalog:MO:Tropicos:2124166	2124166	McMillen 18	H.L. McMillen;H. Bakari;Jestina		3											PRESENT
4061009921		http://www.tropicos.org/Specimen/1937193		CC_BY_4_0				Missouri Botanical Garden	PhysicalObject		http://biocol.org/urn:lsid:biocol.org:col:15859			Tropicos	Tropicos	MOBOT	PRESERVED_SPECIMEN				urn:catalog:MO:Tropicos:1937193	1937193	Walters 1405	Gretchen Walters;Gauthier Moussavou													PRESENT
4061004395		http://www.tropicos.org/Specimen/1812300		CC_BY_4_0				Missouri Botanical Garden	PhysicalObject		http://biocol.org/urn:lsid:biocol.org:col:15859			Tropicos	Tropicos	MOBOT	PRESERVED_SPECIMEN				urn:catalog:MO:Tropicos:1812300	1812300	Mwangulango 997	Nathan A. Mwangulango		5											PRESENT
4060992601		http://www.tropicos.org/Specimen/1797169		CC_BY_4_0				Missouri Botanical Garden	PhysicalObject		http://biocol.org/urn:lsid:biocol.org:col:15859			Tropicos	Tropicos	MOBOT	PRESERVED_SPECIMEN				urn:catalog:MO:Tropicos:1797169	1797169	Gentry 11254	Alwyn H. Gentry													PRESENT
4060981606		http://www.tropicos.org/Specimen/1541028		CC_BY_4_0				Missouri Botanical Garden	PhysicalObject		http://biocol.org/urn:lsid:biocol.org:col:15859			Tropicos	Tropicos	MOBOT	PRESERVED_SPECIMEN				urn:catalog:MO:Tropicos:1541028	1541028	Kindeketa 872	William J. Kindeketa;Dickson		6											PRESENT
4060981557		http://www.tropicos.org/Specimen/1539351		CC_BY_4_0				Missouri Botanical Garden	PhysicalObject		http://biocol.org/urn:lsid:biocol.org:col:15859			Tropicos	Tropicos	MOBOT	PRESERVED_SPECIMEN				urn:catalog:MO:Tropicos:1539351	1539351	Kindeketa 495	William J. Kindeketa		4											PRESENT
4060981423		http://www.tropicos.org/Specimen/1509277		CC_BY_4_0				Missouri Botanical Garden	PhysicalObject		http://biocol.org/urn:lsid:biocol.org:col:15859			Tropicos	Tropicos	MOBOT	PRESERVED_SPECIMEN				urn:catalog:MO:Tropicos:1509277	1509277	Walters 463	Gretchen Walters;et al.		6											PRESENT
4060977532		http://www.tropicos.org/Specimen/1705094		CC_BY_4_0				Missouri Botanical Garden	PhysicalObject		http://biocol.org/urn:lsid:biocol.org:col:15859			Tropicos	Tropicos	MOBOT	PRESERVED_SPECIMEN				urn:catalog:MO:Tropicos:1705094	1705094	Mlangwa 1670	John A. Mlangwa;H.A. Msangi		6											PRESENT
4060977527		http://www.tropicos.org/Specimen/1704846		CC_BY_4_0				Missouri Botanical Garden	PhysicalObject		http://biocol.org/urn:lsid:biocol.org:col:15859			Tropicos	Tropicos	MOBOT	PRESERVED_SPECIMEN				urn:catalog:MO:Tropicos:1704846	1704846	Mlangwa 1611	John A. Mlangwa;H.A. Msangi		6											PRESENT
4060968675		http://www.tropicos.org/Specimen/1559458		CC_BY_4_0				Missouri Botanical Garden	PhysicalObject		http://biocol.org/urn:lsid:biocol.org:col:15859			Tropicos	Tropicos	MOBOT	PRESERVED_SPECIMEN				urn:catalog:MO:Tropicos:1559458	1559458	Mlangwa 1125	John A. Mlangwa;William J. Kindeketa;et al.		4											PRESENT
4060966705		http://www.tropicos.org/Specimen/1438849		CC_BY_4_0				Missouri Botanical Garden	PhysicalObject		http://biocol.org/urn:lsid:biocol.org:col:15859			Tropicos	Tropicos	MOBOT	PRESERVED_SPECIMEN				urn:catalog:MO:Tropicos:1438849	1438849	Mwangoka 747	Moses A. Mwangoka		6											PRESENT
4060965905		http://www.tropicos.org/Specimen/1457502		CC_BY_4_0				Missouri Botanical Garden	PhysicalObject		http://biocol.org/urn:lsid:biocol.org:col:15859			Tropicos	Tropicos	MOBOT	PRESERVED_SPECIMEN				urn:catalog:MO:Tropicos:1457502	1457502	Kayombo 2798	C.J. Kayombo;S. Kikoti		6											PRESENT
4060964945		http://www.tropicos.org/Specimen/1572787		CC_BY_4_0				Missouri Botanical Garden	PhysicalObject		http://biocol.org/urn:lsid:biocol.org:col:15859			Tropicos	Tropicos	MOBOT	PRESERVED_SPECIMEN				urn:catalog:MO:Tropicos:1572787	1572787	Sitoni 1283	D. Sitoni;M. Timoteo		3											PRESENT
4060960282		http://www.tropicos.org/Specimen/1541628		CC_BY_4_0				Missouri Botanical Garden	PhysicalObject		http://biocol.org/urn:lsid:biocol.org:col:15859			Tropicos	Tropicos	MOBOT	PRESERVED_SPECIMEN				urn:catalog:MO:Tropicos:1541628	1541628	Festo 979	L. Festo;Gabriel Simon Laizer;et al.		6											PRESENT
4060960156		http://www.tropicos.org/Specimen/1517324		CC_BY_4_0				Missouri Botanical Garden	PhysicalObject		http://biocol.org/urn:lsid:biocol.org:col:15859			Tropicos	Tropicos	MOBOT	PRESERVED_SPECIMEN				urn:catalog:MO:Tropicos:1517324	1517324	Mwangulango 312	Nathan A. Mwangulango		9											PRESENT
4060959346		http://www.tropicos.org/Specimen/1442837		CC_BY_4_0				Missouri Botanical Garden	PhysicalObject		http://biocol.org/urn:lsid:biocol.org:col:15859			Tropicos	Tropicos	MOBOT	PRESERVED_SPECIMEN				urn:catalog:MO:Tropicos:1442837	1442837	Kayombo 2248	C.J. Kayombo		6											PRESENT
4060957044		http://www.tropicos.org/Specimen/1500850		CC_BY_4_0				Missouri Botanical Garden	PhysicalObject		http://biocol.org/urn:lsid:biocol.org:col:15859			Tropicos	Tropicos	MOBOT	PRESERVED_SPECIMEN				urn:catalog:MO:Tropicos:1500850	1500850	Gentry 33544	Alwyn H. Gentry		1											PRESENT
4060954816		http://www.tropicos.org/Specimen/102493673		CC_BY_4_0				Missouri Botanical Garden	PhysicalObject		http://biocol.org/urn:lsid:biocol.org:col:15859		K	Tropicos	Tropicos	MOBOT	PRESERVED_SPECIMEN				urn:catalog:MO:Tropicos:102493673	102493673	Bernard 1323	Roger Bernard;et al.		6											PRESENT
4060952961		http://www.tropicos.org/Specimen/102493675		CC_BY_4_0				Missouri Botanical Garden	PhysicalObject		http://biocol.org/urn:lsid:biocol.org:col:15859		TAN	Tropicos	Tropicos	MOBOT	PRESERVED_SPECIMEN				urn:catalog:MO:Tropicos:102493675	102493675	Bernard 1323	Roger Bernard;et al.		6											PRESENT
4060948498		http://www.tropicos.org/Specimen/1347744		CC_BY_4_0				Missouri Botanical Garden	PhysicalObject		http://biocol.org/urn:lsid:biocol.org:col:15859			Tropicos	Tropicos	MOBOT	PRESERVED_SPECIMEN				urn:catalog:MO:Tropicos:1347744	1347744	Mwangoka 178	Moses A. Mwangoka		7											PRESENT
4060947609		http://www.tropicos.org/Specimen/1355236		CC_BY_4_0				Missouri Botanical Garden	PhysicalObject		http://biocol.org/urn:lsid:biocol.org:col:15859			Tropicos	Tropicos	MOBOT	PRESERVED_SPECIMEN				urn:catalog:MO:Tropicos:1355236	1355236	Schmidt 3585	Heidi H. Schmidt;et al.		4											PRESENT
4060945596		http://www.tropicos.org/Specimen/1386836		CC_BY_4_0				Missouri Botanical Garden	PhysicalObject		http://biocol.org/urn:lsid:biocol.org:col:15859			Tropicos	Tropicos	MOBOT	PRESERVED_SPECIMEN				urn:catalog:MO:Tropicos:1386836	1386836	Festo 419	L. Festo;C.J. Kayombo		6											PRESENT
4060938206		http://www.tropicos.org/Specimen/102414358		CC_BY_4_0				Missouri Botanical Garden	PhysicalObject		http://biocol.org/urn:lsid:biocol.org:col:15859		TAN	Tropicos	Tropicos	MOBOT	PRESERVED_SPECIMEN				urn:catalog:MO:Tropicos:102414358	102414358	Miandrimanana 174	Cyprien Miandrimanana;et al.		4											PRESENT
4060934393		http://www.tropicos.org/Specimen/1216490		CC_BY_4_0				Missouri Botanical Garden	PhysicalObject		http://biocol.org/urn:lsid:biocol.org:col:15859			Tropicos	Tropicos	MOBOT	PRESERVED_SPECIMEN				urn:catalog:MO:Tropicos:1216490	1216490	Kotozafy 789	Alphonse Kotozafy;Paul Rasabo;F. Ratalata		10											PRESENT
4060927327		http://www.tropicos.org/Specimen/1248970		CC_BY_4_0				Missouri Botanical Garden	PhysicalObject		http://biocol.org/urn:lsid:biocol.org:col:15859			Tropicos	Tropicos	MOBOT	PRESERVED_SPECIMEN				urn:catalog:MO:Tropicos:1248970	1248970	Vasey 378	N. Vasey;R. Behasy		6											PRESENT
4060918547		http://www.tropicos.org/Specimen/1134215		CC_BY_4_0				Missouri Botanical Garden	PhysicalObject		http://biocol.org/urn:lsid:biocol.org:col:15859			Tropicos	Tropicos	MOBOT	PRESERVED_SPECIMEN				urn:catalog:MO:Tropicos:1134215	1134215	Service Forestier Madagascar 15103	Service Forestier (SF)													PRESENT
4060913062		http://www.tropicos.org/Specimen/1216159		CC_BY_4_0				Missouri Botanical Garden	PhysicalObject		http://biocol.org/urn:lsid:biocol.org:col:15859			Tropicos	Tropicos	MOBOT	PRESERVED_SPECIMEN				urn:catalog:MO:Tropicos:1216159	1216159	Kotozafy 736	Alphonse Kotozafy;Paul Rasabo;F. Ratalata		2											PRESENT
4060912713		http://www.tropicos.org/Specimen/1162308		CC_BY_4_0				Missouri Botanical Garden	PhysicalObject		http://biocol.org/urn:lsid:biocol.org:col:15859			Tropicos	Tropicos	MOBOT	PRESERVED_SPECIMEN				urn:catalog:MO:Tropicos:1162308	1162308	Renehan 16	G. Renehan		3											PRESENT
4060912298		http://www.tropicos.org/Specimen/1217042		CC_BY_4_0				Missouri Botanical Garden	PhysicalObject		http://biocol.org/urn:lsid:biocol.org:col:15859			Tropicos	Tropicos	MOBOT	PRESERVED_SPECIMEN				urn:catalog:MO:Tropicos:1217042	1217042	Kotozafy 899	Alphonse Kotozafy		5											PRESENT
4060912290		http://www.tropicos.org/Specimen/1216162		CC_BY_4_0				Missouri Botanical Garden	PhysicalObject		http://biocol.org/urn:lsid:biocol.org:col:15859			Tropicos	Tropicos	MOBOT	PRESERVED_SPECIMEN				urn:catalog:MO:Tropicos:1216162	1216162	Kotozafy 739	Alphonse Kotozafy;Paul Rasabo;F. Ratalata		2											PRESENT
4060911087		http://www.tropicos.org/Specimen/1216157		CC_BY_4_0				Missouri Botanical Garden	PhysicalObject		http://biocol.org/urn:lsid:biocol.org:col:15859			Tropicos	Tropicos	MOBOT	PRESERVED_SPECIMEN				urn:catalog:MO:Tropicos:1216157	1216157	Kotozafy 734	Alphonse Kotozafy;Paul Rasabo;F. Ratalata		2											PRESENT
4060902511		http://www.tropicos.org/Specimen/1007199		CC_BY_4_0				Missouri Botanical Garden	PhysicalObject		http://biocol.org/urn:lsid:biocol.org:col:15859			Tropicos	Tropicos	MOBOT	PRESERVED_SPECIMEN				urn:catalog:MO:Tropicos:1007199	1007199	Gereau 5887	Roy E. Gereau;F.M. Mbago;C.J. Kayombo;H. Matama		7											PRESENT
4060895545		http://www.tropicos.org/Specimen/1007113		CC_BY_4_0				Missouri Botanical Garden	PhysicalObject		http://biocol.org/urn:lsid:biocol.org:col:15859			Tropicos	Tropicos	MOBOT	PRESERVED_SPECIMEN				urn:catalog:MO:Tropicos:1007113	1007113	Gereau 5850	Roy E. Gereau;F.M. Mbago;et al.		7											PRESENT
4060889917		http://www.tropicos.org/Specimen/957620		CC_BY_4_0				Missouri Botanical Garden	PhysicalObject		http://biocol.org/urn:lsid:biocol.org:col:15859			Tropicos	Tropicos	MOBOT	PRESERVED_SPECIMEN				urn:catalog:MO:Tropicos:957620	957620	Turk 430	Dan Turk		6											PRESENT
4060889817		http://www.tropicos.org/Specimen/951152		CC_BY_4_0				Missouri Botanical Garden	PhysicalObject		http://biocol.org/urn:lsid:biocol.org:col:15859			Tropicos	Tropicos	MOBOT	PRESERVED_SPECIMEN				urn:catalog:MO:Tropicos:951152	951152	Harder 2788	Daniel K. Harder;et al.		3											PRESENT
4060889520		http://www.tropicos.org/Specimen/921809		CC_BY_4_0				Missouri Botanical Garden	PhysicalObject		http://biocol.org/urn:lsid:biocol.org:col:15859			Tropicos	Tropicos	MOBOT	PRESERVED_SPECIMEN				urn:catalog:MO:Tropicos:921809	921809	Kotozafy 425	Alphonse Kotozafy		2											PRESENT
4060884524		http://www.tropicos.org/Specimen/921829		CC_BY_4_0				Missouri Botanical Garden	PhysicalObject		http://biocol.org/urn:lsid:biocol.org:col:15859			Tropicos	Tropicos	MOBOT	PRESERVED_SPECIMEN				urn:catalog:MO:Tropicos:921829	921829	Kotozafy 434	Alphonse Kotozafy		2											PRESENT
4060884523		http://www.tropicos.org/Specimen/921807		CC_BY_4_0				Missouri Botanical Garden	PhysicalObject		http://biocol.org/urn:lsid:biocol.org:col:15859			Tropicos	Tropicos	MOBOT	PRESERVED_SPECIMEN				urn:catalog:MO:Tropicos:921807	921807	Kotozafy 424	Alphonse Kotozafy		2											PRESENT
4060884030		http://www.tropicos.org/Specimen/971328		CC_BY_4_0				Missouri Botanical Garden	PhysicalObject		http://biocol.org/urn:lsid:biocol.org:col:15859			Tropicos	Tropicos	MOBOT	PRESERVED_SPECIMEN				urn:catalog:MO:Tropicos:971328	971328	Harder 3328	Daniel K. Harder;et al.		6											PRESENT
4060883525		http://www.tropicos.org/Specimen/921828		CC_BY_4_0				Missouri Botanical Garden	PhysicalObject		http://biocol.org/urn:lsid:biocol.org:col:15859			Tropicos	Tropicos	MOBOT	PRESERVED_SPECIMEN				urn:catalog:MO:Tropicos:921828	921828	Kotozafy 433	Alphonse Kotozafy		2											PRESENT
4060883524		http://www.tropicos.org/Specimen/921817		CC_BY_4_0				Missouri Botanical Garden	PhysicalObject		http://biocol.org/urn:lsid:biocol.org:col:15859			Tropicos	Tropicos	MOBOT	PRESERVED_SPECIMEN				urn:catalog:MO:Tropicos:921817	921817	Kotozafy 429	Alphonse Kotozafy		2											PRESENT
4060883523		http://www.tropicos.org/Specimen/921806		CC_BY_4_0				Missouri Botanical Garden	PhysicalObject		http://biocol.org/urn:lsid:biocol.org:col:15859			Tropicos	Tropicos	MOBOT	PRESERVED_SPECIMEN				urn:catalog:MO:Tropicos:921806	921806	Kotozafy 423	Alphonse Kotozafy		2											PRESENT
4060882912		http://www.tropicos.org/Specimen/954985		CC_BY_4_0				Missouri Botanical Garden	PhysicalObject		http://biocol.org/urn:lsid:biocol.org:col:15859			Tropicos	Tropicos	MOBOT	PRESERVED_SPECIMEN				urn:catalog:MO:Tropicos:954985	954985	Turk 248	Dan Turk		10											PRESENT
4060880632		http://www.tropicos.org/Specimen/926908		CC_BY_4_0				Missouri Botanical Garden	PhysicalObject		http://biocol.org/urn:lsid:biocol.org:col:15859			Tropicos	Tropicos	MOBOT	PRESERVED_SPECIMEN				urn:catalog:MO:Tropicos:926908	926908	Antilahimena 97	P. Antilahimena		10											PRESENT
4060880582		http://www.tropicos.org/Specimen/921815		CC_BY_4_0				Missouri Botanical Garden	PhysicalObject		http://biocol.org/urn:lsid:biocol.org:col:15859			Tropicos	Tropicos	MOBOT	PRESERVED_SPECIMEN				urn:catalog:MO:Tropicos:921815	921815	Kotozafy 428	Alphonse Kotozafy		2											PRESENT
4060863557		http://www.tropicos.org/Specimen/208394		CC_BY_4_0				Missouri Botanical Garden	PhysicalObject		http://biocol.org/urn:lsid:biocol.org:col:15859			Tropicos	Tropicos	MOBOT	PRESERVED_SPECIMEN				urn:catalog:MO:Tropicos:208394	208394	Lovett 315	Peter Lovett;C.J. Kayombo		6											PRESENT
4060863551		http://www.tropicos.org/Specimen/202459		CC_BY_4_0				Missouri Botanical Garden	PhysicalObject		http://biocol.org/urn:lsid:biocol.org:col:15859			Tropicos	Tropicos	MOBOT	PRESERVED_SPECIMEN				urn:catalog:MO:Tropicos:202459	202459	Lowry 4561	Porter P. Lowry II		5											PRESENT
4053692612				CC_BY_4_0							CNF		UJLOG	UCJ			HUMAN_OBSERVATION				CNFDOB018127																PRESENT
4050443463			fr | en	CC_BY_4_0								EB6380B5-80AF-5935-E053-0514A8C08744					HUMAN_OBSERVATION				6bcc4025-0dfe-47c5-b920-143243d99fd4																PRESENT				TaxREF
4042929603				CC_BY_NC_4_0			http://nsii.org.cn/2017/specimen.php?id=20411014						KUN				PRESERVED_SPECIMEN				20411014	1321673		"éƒ­æ°¸æ°, åˆ˜æˆ"													PRESENT
4042917658				CC_BY_NC_4_0			http://nsii.org.cn/2017/specimen.php?id=16528627						PE				PRESERVED_SPECIMEN				16528627	1942412		H.J.Beentje													PRESENT
4042896893				CC_BY_NC_4_0			http://nsii.org.cn/2017/specimen.php?id=6959195						PE				PRESERVED_SPECIMEN				6959195	1228320		A.A.Enti													PRESENT
4042820692				CC_BY_NC_4_0			http://nsii.org.cn/2017/specimen.php?id=20411015						KUN				PRESERVED_SPECIMEN				20411015	1321674		"éƒ­æ°¸æ°, åˆ˜æˆ"													PRESENT
4042820586				CC_BY_NC_4_0			http://nsii.org.cn/2017/specimen.php?id=20096302						KUN				PRESERVED_SPECIMEN				20096302	1484897		"æŽå¾·é“¢, å¼ æŒº, é©¬é¹é£ž"													PRESENT
4042782726				CC_BY_NC_4_0			http://nsii.org.cn/2017/specimen.php?id=16529368						PE				PRESERVED_SPECIMEN				16529368	1943177		J.Schoenmaker													PRESENT
4042636041				CC_BY_NC_4_0			http://nsii.org.cn/2017/specimen.php?id=6959194						PE				PRESERVED_SPECIMEN				6959194	1228321		A.A.Enti													PRESENT
4032188406	Users are required to adhere to Bell Museum collections policy. Questions may be directed to the curator in charge.		en	CC0_1_0	2023-03-16T14:57:51Z		https://bellatlas.umn.edu:443/collections/individual/index.php?occid=3061386	Bell Museum			f292c83d-305c-4b22-97cc-cd9c72e2931e		MIN	Plants			PRESERVED_SPECIMEN				23104cc9-89fb-44b9-bd07-f83d1f92f5cf	482351	2684	Rakotozafy, A; Phillipson, P													PRESENT							1370105	common in disturbed places; tree to 10m, latex yellow, becoming red. Most young parts covered with roufus indumentum. Leaves glossy, dark green above, with red midrib. Young fruits pale green
4032158278		http://www.tropicos.org/Specimen/103160642		CC_BY_4_0				Missouri Botanical Garden	PhysicalObject		http://biocol.org/urn:lsid:biocol.org:col:15859		MO	Tropicos	Tropicos	MOBOT	PRESERVED_SPECIMEN				urn:catalog:MO:Tropicos:103160642	103160642	Abeid 4025	Y.S. Abeid;K.J. Ally;A.J. Ally		7											PRESENT
4032147327		http://www.tropicos.org/Specimen/102837907		CC_BY_4_0				Missouri Botanical Garden	PhysicalObject		http://biocol.org/urn:lsid:biocol.org:col:15859		MO	Tropicos	Tropicos	MOBOT	PRESERVED_SPECIMEN				urn:catalog:MO:Tropicos:102837907	102837907	Randrianaivo 2233	Richard Randrianaivo;Tahiry Rivo Harison Victoria;Armand Rakotomalala;Herizo Njakatiana Andriamahefa;Claudia Rasolofomanana Lovasoa Maminiaina Lucile;Tantely Rasoambolanoro Maminiaina;Ihavontsoa Rasolonirina Tsilavina Elinah;Armand Randriantsarafara;Andry Rasamuel;Ravakiniaina Rasolofomanana Lovasoa		4											PRESENT
4032138077		http://www.tropicos.org/Specimen/102557469		CC_BY_4_0				Missouri Botanical Garden	PhysicalObject		http://biocol.org/urn:lsid:biocol.org:col:15859		MO	Tropicos	Tropicos	MOBOT	PRESERVED_SPECIMEN				urn:catalog:MO:Tropicos:102557469	102557469	Luke 12066	W.R.Q. Luke;Fermin		1											PRESENT
4032136331		http://www.tropicos.org/Specimen/102743002		CC_BY_4_0				Missouri Botanical Garden	PhysicalObject		http://biocol.org/urn:lsid:biocol.org:col:15859		MO	Tropicos	Tropicos	MOBOT	PRESERVED_SPECIMEN				urn:catalog:MO:Tropicos:102743002	102743002	Antilahimena 7355	P. Antilahimena;FÃ©lix Edmond		2											PRESENT
4032130978		http://www.tropicos.org/Specimen/102493677		CC_BY_4_0				Missouri Botanical Garden	PhysicalObject		http://biocol.org/urn:lsid:biocol.org:col:15859		MO	Tropicos	Tropicos	MOBOT	PRESERVED_SPECIMEN				urn:catalog:MO:Tropicos:102493677	102493677	Bernard 1323	Roger Bernard;et al.		6											PRESENT
4032126184		http://www.tropicos.org/Specimen/103147567		CC_BY_4_0				Missouri Botanical Garden	PhysicalObject		http://biocol.org/urn:lsid:biocol.org:col:15859		MO	Tropicos	Tropicos	MOBOT	PRESERVED_SPECIMEN				urn:catalog:MO:Tropicos:103147567	103147567	KoÃ¯vogui 156	Kolou KoÃ¯vogui;Moussa DiabatÃ©;Philomena Yarwoah;Lansana KonatÃ©		6											PRESENT
4032118343		http://www.tropicos.org/Specimen/103016854		CC_BY_4_0				Missouri Botanical Garden	PhysicalObject		http://biocol.org/urn:lsid:biocol.org:col:15859		MO	Tropicos	Tropicos	MOBOT	PRESERVED_SPECIMEN				urn:catalog:MO:Tropicos:103016854	103016854	Texier 802	Nicolas Texier;Raoul Niangadouma;Diosdado Nguema;Eric Akouangou;Jean de Dieu Kaparidi;Elie Nzigou Doubindou		4											PRESENT
4032118333		http://www.tropicos.org/Specimen/103015534		CC_BY_4_0				Missouri Botanical Garden	PhysicalObject		http://biocol.org/urn:lsid:biocol.org:col:15859		MO	Tropicos	Tropicos	MOBOT	PRESERVED_SPECIMEN				urn:catalog:MO:Tropicos:103015534	103015534	Trigui 377	S.M. Trigui;M.H. Razanajatovo;S.D. Ramandimbimanana		6											PRESENT
4032116509		http://www.tropicos.org/Specimen/102578035		CC_BY_4_0				Missouri Botanical Garden	PhysicalObject		http://biocol.org/urn:lsid:biocol.org:col:15859		MO	Tropicos	Tropicos	MOBOT	PRESERVED_SPECIMEN				urn:catalog:MO:Tropicos:102578035	102578035	Randriamiharisoa 4	T. Randriamiharisoa;Jean;Rivo		2											PRESENT
4032104808		http://www.tropicos.org/Specimen/102198326		CC_BY_4_0				Missouri Botanical Garden	PhysicalObject		http://biocol.org/urn:lsid:biocol.org:col:15859		MO	Tropicos	Tropicos	MOBOT	PRESERVED_SPECIMEN				urn:catalog:MO:Tropicos:102198326	102198326	Razanatsoa 147	H. Razanatsoa		5											PRESENT
4032103931		http://www.tropicos.org/Specimen/102928354		CC_BY_4_0				Missouri Botanical Garden	PhysicalObject		http://biocol.org/urn:lsid:biocol.org:col:15859		MO	Tropicos	Tropicos	MOBOT	PRESERVED_SPECIMEN				urn:catalog:MO:Tropicos:102928354	102928354	Ikabanga 516	Davy Ikabanga;AurÃ©lien Mokea		6											PRESENT
4032102926		http://www.tropicos.org/Specimen/102539471		CC_BY_4_0				Missouri Botanical Garden	PhysicalObject		http://biocol.org/urn:lsid:biocol.org:col:15859		MO	Tropicos	Tropicos	MOBOT	PRESERVED_SPECIMEN				urn:catalog:MO:Tropicos:102539471	102539471	Leal 282	Miguel E. Leal;Diosdado Nguema;Etienne Mounoumoulossi;P. Bissiemou		3											PRESENT
4032098777		http://www.tropicos.org/Specimen/102544403		CC_BY_4_0				Missouri Botanical Garden	PhysicalObject		http://biocol.org/urn:lsid:biocol.org:col:15859		MO	Tropicos	Tropicos	MOBOT	PRESERVED_SPECIMEN				urn:catalog:MO:Tropicos:102544403	102544403	Mwangoka 4710	Moses A. Mwangoka;Jaclyn Hall		3											PRESENT
4032080273		http://www.tropicos.org/Specimen/102742821		CC_BY_4_0				Missouri Botanical Garden	PhysicalObject		http://biocol.org/urn:lsid:biocol.org:col:15859		MO	Tropicos	Tropicos	MOBOT	PRESERVED_SPECIMEN				urn:catalog:MO:Tropicos:102742821	102742821	Antilahimena 7338	P. Antilahimena;FÃ©lix Edmond		2											PRESENT
4032068149		http://www.tropicos.org/Specimen/102740806		CC_BY_4_0				Missouri Botanical Garden	PhysicalObject		http://biocol.org/urn:lsid:biocol.org:col:15859		MO	Tropicos	Tropicos	MOBOT	PRESERVED_SPECIMEN				urn:catalog:MO:Tropicos:102740806	102740806	Bidault 177	Ehoarn Bidault;Moussa DiabatÃ©;Tariq StÃ©vart;D. Bilivogui;Gononan TraorÃ©		3											PRESENT
4032065062		http://www.tropicos.org/Specimen/102264073		CC_BY_4_0				Missouri Botanical Garden	PhysicalObject		http://biocol.org/urn:lsid:biocol.org:col:15859		MO	Tropicos	Tropicos	MOBOT	PRESERVED_SPECIMEN				urn:catalog:MO:Tropicos:102264073	102264073	Callmander 340	Martin W. Callmander		6											PRESENT
4032030780		http://www.tropicos.org/Specimen/102414359		CC_BY_4_0				Missouri Botanical Garden	PhysicalObject		http://biocol.org/urn:lsid:biocol.org:col:15859		MO	Tropicos	Tropicos	MOBOT	PRESERVED_SPECIMEN				urn:catalog:MO:Tropicos:102414359	102414359	Miandrimanana 174	Cyprien Miandrimanana;et al.		4											PRESENT
4032009550		http://www.tropicos.org/Specimen/103184438		CC_BY_4_0				Missouri Botanical Garden	PhysicalObject		http://biocol.org/urn:lsid:biocol.org:col:15859		MO	Tropicos	Tropicos	MOBOT	PRESERVED_SPECIMEN				urn:catalog:MO:Tropicos:103184438	103184438	Eduardo 130	Lewis Eduardo;Angela Lima;Dilson Madre Deus;Pascoal Sousa;EstevÃ£o Soares;AntÃ³nio Camuenha		4											PRESENT
4032001552		http://www.tropicos.org/Specimen/102241782		CC_BY_4_0				Missouri Botanical Garden	PhysicalObject		http://biocol.org/urn:lsid:biocol.org:col:15859		MO	Tropicos	Tropicos	MOBOT	PRESERVED_SPECIMEN				urn:catalog:MO:Tropicos:102241782	102241782	Rakotovao 2773	Charles Rakotovao;et al.		3											PRESENT
4031999154		http://www.tropicos.org/Specimen/103150712		CC_BY_4_0				Missouri Botanical Garden	PhysicalObject		http://biocol.org/urn:lsid:biocol.org:col:15859		MO	Tropicos	Tropicos	MOBOT	PRESERVED_SPECIMEN				urn:catalog:MO:Tropicos:103150712	103150712	Martial 742	Martial		5											PRESENT
4031982946		http://www.tropicos.org/Specimen/103021184		CC_BY_4_0				Missouri Botanical Garden	PhysicalObject		http://biocol.org/urn:lsid:biocol.org:col:15859		MO	Tropicos	Tropicos	MOBOT	PRESERVED_SPECIMEN				urn:catalog:MO:Tropicos:103021184	103021184	Rakotonirina 156	Giovanni A. Rakotonirina;P. Antilahimena;Anthony R. Syde		5											PRESENT
4031969374		http://www.tropicos.org/Specimen/103180873		CC_BY_4_0				Missouri Botanical Garden	PhysicalObject		http://biocol.org/urn:lsid:biocol.org:col:15859		MO	Tropicos	Tropicos	MOBOT	PRESERVED_SPECIMEN				urn:catalog:MO:Tropicos:103180873	103180873	DiabatÃ© 4859	Moussa DiabatÃ©;Mohamed DiabatÃ©;Lansana KonatÃ©		7											PRESENT
4031967279		http://www.tropicos.org/Specimen/101819003		CC_BY_4_0				Missouri Botanical Garden	PhysicalObject		http://biocol.org/urn:lsid:biocol.org:col:15859		MO	Tropicos	Tropicos	MOBOT	PRESERVED_SPECIMEN				urn:catalog:MO:Tropicos:101819003	101819003	Kotozafy 993	Alphonse Kotozafy		4											PRESENT
4031955522		http://www.tropicos.org/Specimen/103184904		CC_BY_4_0				Missouri Botanical Garden	PhysicalObject		http://biocol.org/urn:lsid:biocol.org:col:15859		MO	Tropicos	Tropicos	MOBOT	PRESERVED_SPECIMEN				urn:catalog:MO:Tropicos:103184904	103184904	Lima 29	Angela Lima;AntÃ³nio Camuenha;Dilson Madre Deus;EstevÃ£o Soares;Lewis Eduardo;Pascoal Sousa		5											PRESENT
4031930959		http://www.tropicos.org/Specimen/103226228		CC_BY_4_0				Missouri Botanical Garden	PhysicalObject		http://biocol.org/urn:lsid:biocol.org:col:15859		MO	Tropicos	Tropicos	MOBOT	PRESERVED_SPECIMEN				urn:catalog:MO:Tropicos:103226228	103226228	Randriatahina 122	Randriatahina, James		5											PRESENT
4031921307		http://www.tropicos.org/Specimen/103184228		CC_BY_4_0				Missouri Botanical Garden	PhysicalObject		http://biocol.org/urn:lsid:biocol.org:col:15859		MO	Tropicos	Tropicos	MOBOT	PRESERVED_SPECIMEN				urn:catalog:MO:Tropicos:103184228	103184228	Eduardo 50	Lewis Eduardo		4											PRESENT
4031920040		http://www.tropicos.org/Specimen/103011487		CC_BY_4_0				Missouri Botanical Garden	PhysicalObject		http://biocol.org/urn:lsid:biocol.org:col:15859		MO	Tropicos	Tropicos	MOBOT	PRESERVED_SPECIMEN				urn:catalog:MO:Tropicos:103011487	103011487	Ramandimbimanana 51	S.D. Ramandimbimanana		4											PRESENT
4031910757		http://www.tropicos.org/Specimen/102982914		CC_BY_4_0				Missouri Botanical Garden	PhysicalObject		http://biocol.org/urn:lsid:biocol.org:col:15859		MO	Tropicos	Tropicos	MOBOT	PRESERVED_SPECIMEN				urn:catalog:MO:Tropicos:102982914	102982914	Birkinshaw 2208	Chris Birkinshaw		1											PRESENT
4031903247		http://www.tropicos.org/Specimen/102959449		CC_BY_4_0				Missouri Botanical Garden	PhysicalObject		http://biocol.org/urn:lsid:biocol.org:col:15859		MO	Tropicos	Tropicos	MOBOT	PRESERVED_SPECIMEN				urn:catalog:MO:Tropicos:102959449	102959449	Nguema 2564	Diosdado Nguema;HervÃ© Memiague;P. Bissiemou;Etienne Mounoumoulossi		3											PRESENT
4031888215		http://www.tropicos.org/Specimen/101818431		CC_BY_4_0				Missouri Botanical Garden	PhysicalObject		http://biocol.org/urn:lsid:biocol.org:col:15859		MO	Tropicos	Tropicos	MOBOT	PRESERVED_SPECIMEN				urn:catalog:MO:Tropicos:101818431	101818431	Andrianantoanina 205	Olivier Andrianantoanina;R. Bezana		10											PRESENT
4031870298		http://www.tropicos.org/Specimen/103235028		CC_BY_4_0				Missouri Botanical Garden	PhysicalObject		http://biocol.org/urn:lsid:biocol.org:col:15859		MO	Tropicos	Tropicos	MOBOT	PRESERVED_SPECIMEN				urn:catalog:MO:Tropicos:103235028	103235028	Razakamalala 9075	Richard Razakamalala		3											PRESENT
[truncated: 3,623 more rows]
[truncated: 162 more columns]
