# Supplementary material for: A scoping review of tropical pioneer trees’ roles for restoration and conservation management: Harungana madagascariensis (Hypericaceae) a widespread African species as a model
Source: PeerJ. 2025 May 23;13:e19458. doi: 10.7717/peerj.19458 (PMC12105622; doi:10.7717/peerj.19458)
Supplement: Supplemental Information 4 [file peerj-13-19458-s004.xlsx]

## Sheet: Supplemental Table S4
Scientific name	Order	Family	Interaction
Aleurocanthus alternans	Hemiptera	Aleyrodidae	Undefined
Andropadus importunus	Passeriformes	Pycnonotidae	Predation or mutualism (frugivory)
Anopheles implexus	Diptera	Culicidae	Mutualism (potential) - flower visitation
Apalis thoracica	Passeriformes	Cisticolidae	Predation or mutualism (frugivory)
Apis mellifera	Hymenoptera	Apidae	Mutualism (potential) - flower visitation
Apis mellifera adansonii	Hymenoptera	Apidae	Mutualism (potential) - flower visitation
Apis mellifera unicolor	Hymenoptera	Apidae	Mutualism (potential) - flower visitation
Arizelocichla masukuensis	Passeriformes	Pycnonotidae	Predation or mutualism (frugivory)
Avahi laniger	Primates	Indriidae	Predation or mutualism (frugivory)
Baeopogon indicator	Passeriformes	Pycnonotidae	Predation or mutualism (frugivory)
Baillonella toxisperma	Ericales	Sapotaceae	Competition
Borocera marginepunctata	Lepidoptera	Lasiocampidae	Predation (folivory)
Buccanodon duchaillui	Piciformes	Lybiidae	Predation or mutualism (frugivory)
Bycanistes brevis	Bucerotiformes	Bucerotidae	Predation or mutualism (frugivory)
Bycanistes subcylindricus	Bucerotiformes	Bucerotidae	Predation or mutualism (frugivory)
Calcarisporium acerosum	Hypocreales	Calcarisporiaceae	Commensalism
Calyptocichla serinus	Passeriformes	Pycnonotidae	Predation or mutualism (frugivory)
Carausius morosus	Phasmatodea	Lonchodidae	Undefined
Ceratina ericia	Hymenoptera	Apidae	Mutualism (potential) - flower visitation
Ceratina sp.	Hymenoptera	Apidae	Mutualism (potential) - flower visitation
Cercopithecus aethiops pygerythrus	Primates	Cercopithecidae	Predation (folivory) and Predation or mutualism (frugivory)
Cercopithecus ascanius	Primates	Cercopithecidae	Predation or mutualism (frugivory)
Cercopithecus mitis stuhlmanni	Primates	Cercopithecidae	Predation or mutualism (frugivory)
Cheilolejeunea sp.	Porellales	Lejeuneaceae	Commensalism
Chlorocebus tantalus tantalus	Primates	Cercopithecidae	Predation or mutualism (frugivory)
Chlorocichla laetissima	Passeriformes	Pycnonotidae	Predation or mutualism (frugivory)
Cinnyricinclus leucogaster	Passeriformes	Sturnidae	Predation or mutualism (frugivory)
Cinnyris reichenowi	Passeriformes	Nectariniidae	Mutualism (potential) - flower visitation
Cinnyris venustus	Passeriformes	Nectariniidae	Mutualism (potential) - flower visitation
Circinotrichum poonense	Xylariales	Xylariaceae	Commensalism
Colius striatus	Coliiformes	Coliidae	Predation or mutualism (frugivory)
Ctenoplectra antinorii	Hymenoptera	Apidae	Mutualism (potential) - flower visitation
Cyanomitra verticalis	Passeriformes	Nectariniidae	Commensalism
Eulemur rubriventer	Primates	Lemuridae	Predation or mutualism (frugivory)
Euplectes capensis	Passeriformes	Ploceidae	Predation or mutualism (frugivory)
Eurillas ansorgei	Passeriformes	Pycnonotidae	Predation or mutualism (frugivory)
Eurillas curvirostris	Passeriformes	Pycnonotidae	Predation or mutualism (frugivory)
Eurillas gracilis	Passeriformes	Pycnonotidae	Predation or mutualism (frugivory)
Eurillas latirostris	Passeriformes	Pycnonotidae	Predation or mutualism (frugivory)
Eurillas virens	Passeriformes	Pycnonotidae	Predation or mutualism (frugivory)
Gorilla beringei graueri	Primates	Hominidae	Predation (herbivory)
Gymnobucco bonapartei	Piciformes	Lybiidae	Predation or mutualism (frugivory)
Gyrothriz ramosa	Xylariales	Microdochiaceae	Commensalism
honeyguide sp.	Piciformes	NA	Predation or mutualism (frugivory)
Hypotrigona gribodoi	Hymenoptera	Apidae	Mutualism (potential) - flower visitation
Icerya nigroareolata	Hemiptera	Monophlebidae	Undefined
Idiocercus pirozynskii	NA	Ascomycota (Phyllum)	Predation (parasitism)
Iduna pallida	Passeriformes	Acrocephalidae	Predation or mutualism (frugivory)
Imbrasia truncata	Lepidoptera	Saturniidae	Undefined
Lasioglossum (Ipomalictus) guineacola	Hymenoptera	Halictidae	Undefined
Lasioglossum sp.	Hymenoptera	Halictidae	Mutualism (potential) - flower visitation
Liparis ambohimangana	Asparagales	Orchidaceae	Commensalism
Loxodonta cyclotis	Proboscidea	Elephantidae	Predation (folivory and stem damage)
Megachile ?gratiosa	Hymenoptera	Megachilidae	Mutualism (potential) - flower visitation
Meliponula ?denoiti	Hymenoptera	Apidae	Mutualism (potential) - flower visitation
Meliponula bocandei	Hymenoptera	Apidae	Mutualism (potential) - flower visitation
Meliponula erthyra	Hymenoptera	Apidae	Mutualism (potential) - flower visitation
Meliponula ferruginea	Hymenoptera	Apidae	Mutualism (potential) - flower visitation
Meliponula lendliana	Hymenoptera	Apidae	Mutualism (potential) - flower visitation
Memnoniella echinata	Hypocreales	Stachybotryaceae	Commensalism
Merops gularis	Coraciiformes	Meropidae	Commensalism
Microcebus rufus	Primates	Cheirogaleidae	Predation or mutualism (frugivory)
mistletoes sp.1	NA	NA	Predation (parasitism)
mistletoes sp.2	NA	NA	Predation (parasitism)
mistletoes sp.3	NA	NA	Predation (parasitism)
mistletoes sp.4	NA	NA	Predation (parasitism)
mistletoes sp.5	NA	NA	Predation (parasitism)
mistletoes sp.6	NA	NA	Predation (parasitism)
mistletoes sp.7	NA	NA	Predation (parasitism)
mistletoes sp.8	NA	NA	Predation (parasitism)
mistletoes sp.9	NA	NA	Predation (parasitism)
Myrmicaria opaciventris	Hymenoptera	Formicidae	Mutualism (myrmecochory)
Oecophylla longinoda	Hymenoptera	Formicidae	Undefined
Pachyhalictus (Dictyohalictus) harunganae	Hymenoptera	Halictidae	Undefined
Pan paniscus	Primates	Hominidae	Predation or mutualism (frugivory)
Pan troglodytes	Primates	Hominidae	Predation (florivory and folivory) and Predation or mutualism (frugivory)
Parasaissetia nigra	Hemiptera	Coccidae	Undefined
Parastictococcus gowdeyi	Hemiptera	Stictococcidae	Undefined
Pasites friesei	Hymenoptera	Apidae	Undefined
Paulianaleyrodes tetracerae Cohic, var. harunganae n.var	Hemiptera	Aleyrodidae	Undefined
Periconia cookei	Pleosporales	Periconiaceae	Commensalism
Pheidole sp.	Hymenoptera	Formicidae	Mutualism (myrmecochory)
Phrosyne brevicornis	Coleoptera	Cerambycidae	Undefined
Phyllastrephus cabanisi	Passeriformes	Pycnonotidae	Predation or mutualism (frugivory)
Phyllastrephus hypochloris	Passeriformes	Pycnonotidae	Predation or mutualism (frugivory)
Phylloscopus trochilus	Passeriformes	Phylloscopidae	Predation or mutualism (frugivory)
Planococcoides njalensis	Hemiptera	Pseudococcidae	Undefined
Ploceus baglafecht	Passeriformes	Ploceidae	Commensalism
Ploceus cucullatus	Passeriformes	Ploceidae	Commensalism
Ploceus nigerrimus	Passeriformes	Ploceidae	Commensalism
Pogoniulus bilineatus	Piciformes	Lybiidae	Predation or mutualism (frugivory)
Popillia merkli	Coleoptera	Scarabaeidae	Undefined
Procolobus rufomitratus	Primates	Cercopithecidae	Predation (folivory)
Psidium guajava	Myrtales	Myrtaceae	Competition
Pycnonotus barbatus	Passeriformes	Pycnonotidae	Predation or mutualism (frugivory)
Pycnonotus jocosus	Passeriformes	Pycnonotidae	Predation or mutualism (frugivory)
Saxicola torquatus	Passeriformes	Muscicapidae	Predation or mutualism (frugivory)
Scolytoplatypus rugosus	Coleoptera	Curculionidae	Undefined
Sellalictus sp.	Hymenoptera	Halictidae	Mutualism (potential) - flower visitation
Sipyloidea sipylus	Phasmatodea	Lonchodidae	Undefined
Sporidesmium pseudoseptatum	NA	Chaetosphaeriaceae	Commensalism
Stachylidium bicolor	Glomerellales	Plectosphaerellaceae	Commensalism
Stelgidillas gracilirostris	Passeriformes	Pycnonotidae	Predation or mutualism (frugivory)
Stelgidillas gracilirostris	Passeriformes	Pycnonotidae	Predation or mutualism (frugivory)
Stenocrobylus festivus	Orthoptera	Acrididae	Undefined
Stictococcus formicarius	Hemiptera	Stictococcidae	Undefined
Stictococcus intermedius	Hemiptera	Stictococcidae	Undefined
Streptopelia semitorquata	Columbiformes	Columbidae	Predation or mutualism (frugivory)
Sylvia atricapilla	Passeriformes	Sylviidae	Predation or mutualism (frugivory)
Terpsiphone viridis	Passeriformes	Monarchidae	Predation or mutualism (frugivory)
Thescelocichla leucopleura	Passeriformes	Pycnonotidae	Predation or mutualism (frugivory)
Thrinchostoma nachtigali	Hymenoptera	Halictidae	Undefined
Thrinchostoma sp.	Hymenoptera	Halictidae	Mutualism (potential) - flower visitation
Thrinchostoma torridum	Hymenoptera	Halictidae	Mutualism (potential) - flower visitation
Torulla herbarum f. quaternella	Pleosporales	Torulaceae	Commensalism
Trachyphonus purpuratus	Piciformes	Lybiidae	Predation or mutualism (frugivory)
Turdus pelios	Passeriformes	Turdidae	Predation or mutualism (frugivory)
Varecia variegata	Primates	Lemuridae	Predation (folivory) and Predation or mutualism (frugivory)
Xyleborinus concavus	Coleoptera	Curculionidae	Undefined
Xyleborinus laevipennis	Coleoptera	Curculionidae	Undefined
Xylocopa flavorufa	Hymenoptera	Apidae	Mutualism (potential) - flower visitation
Xylocopa gabonica	Hymenoptera	Apidae	Mutualism (potential) - flower visitation
Xylocopa hottentotta	Hymenoptera	Apidae	Mutualism (potential) - flower visitation
Xylocopa torrida	Hymenoptera	Apidae	Mutualism (potential) - flower visitation
Zosterops senegalensis	Passeriformes	Zosteropidae	Predation or mutualism (frugivory)
